# Supplementary material for: A genome-wide landscape of mRNAs, lncRNAs, and circRNAs during subcutaneous adipogenesis in pigs
Source: J Anim Sci Biotechnol. 2018 Nov 1;9:76. doi: 10.1186/s40104-018-0292-7 (PMC6211446; doi:10.1186/s40104-018-0292-7)
Supplement: Supplementary file 6 — List of differentially expressed (DE) genes for D4 vs D0. Gene ID, fold change, gene name, biotype, and position of differentially expressed mRNAs, lncRNAs, and circRNAs between D4 versus D0. (XLSX 385 kb) [file 40104_2018_292_MOESM6_ESM.xlsx]

## Sheet: DE mRNAs
Additional file 6 List of differentially expressed (DE) genes for D4 versus D0. List of differentially expressed (DE) mRNAs for D4 versus D0.
Gene	D4_count	D4_normalize	D0_count	D0_normalize	FoldChange	Log2FoldChange	pval	padj	Up/Down	Significant	GeneName	Biotype	Position
gene1086	91457	1229.94	738588	9797.23	0.12554	-2.99379	0	0	down	yes	THBS1	protein_coding	chrNC_010443.5:131728781-131746098:-
gene23386	466602	6275	14167	187.923	33.3914	5.0614	0	0	up	yes	SCD	protein_coding	chrNC_010456.5:111461560-111478033:+
gene24339	729776	9814.24	176368	2339.49	4.19504	2.06868	0	0	up	yes	COL3A1	protein_coding	chrNC_010457.5:93556914-93595678:+
gene5364	46921	631.007	435398	5775.47	0.109256	-3.19421	0	0	down	yes	SERPINE1	protein_coding	chrNC_010445.4:8863738-8871572:+
gene17961	166368	2237.36	649920	8621.07	0.259523	-1.94607	0	0	down	yes	VIM	protein_coding	chrNC_010452.4:43516441-43526172:+
gene3680	75474	1015	456718	6058.28	0.167539	-2.57743	0	0	down	yes	TPM4	protein_coding	chrNC_010444.4:61453721-61476781:-
gene23234	23474	315.685	307460	4078.4	0.0774042	-3.69145	0	0	down	yes	ACTA2	protein_coding	chrNC_010456.5:100868145-100886732:-
gene16575	30451	409.514	308350	4090.2	0.100121	-3.32019	0	0	down	yes	TAGLN	protein_coding	chrNC_010451.4:44561756-44567385:+
gene26475	151402	2036.1	470075	6235.46	0.326535	-1.61469	0	0	down	yes	CALD1	protein_coding	chrNC_010460.4:14267955-14486641:-
gene821	30429	409.218	225881	2996.27	0.136576	-2.87223	0	0	down	yes	TPM1	protein_coding	chrNC_010443.5:108986981-109016090:-
gene8782	34689	466.508	223898	2969.96	0.157075	-2.67047	0	0	down	yes	LGALS1	protein_coding	chrNC_010447.5:10149069-10152514:-
gene26961	32903	442.489	215301	2855.93	0.154937	-2.69025	0	0	down	yes	TMSB4X	protein_coding	chrNC_010461.5:9649516-9651662:+
gene1408	259359	3487.93	57640	764.584	4.56187	2.18963	0	0	up	yes	RPS29	protein_coding	chrNC_010443.5:179454923-179456847:-
gene11917	108163	1454.61	5144	68.2342	21.3179	4.41399	0	0	up	yes	FABP3	protein_coding	chrNC_010448.4:87943003-87950708:-
gene18705	176953	2379.71	33127	439.423	5.41554	2.4371	0	0	up	yes	COL4A1	protein_coding	chrNC_010453.5:76858332-76997409:-
gene11027	277623	3733.55	85884	1139.24	3.27725	1.71248	0	0	up	yes	FTL	protein_coding	chrNC_010448.4:54231121-54232756:+
gene3156	99985	1344.63	7226	95.8515	14.0282	3.81026	0	0	up	yes	CAT	protein_coding	chrNC_010444.4:26493664-26533881:-
gene17376	103935	1397.75	9079	120.431	11.6062	3.53682	0	0	up	yes	GLUL	protein_coding	chrNC_010451.4:123751551-123762575:-
gene24976	90745	1220.36	6426	85.2397	14.3169	3.83964	0	0	up	yes	SELENOP	protein_coding	chrNC_010458.4:27537885-27547863:-
rna78603	107631	1447.45	12810	169.922	8.51832	3.09057	0	0	up	yes	rna78603	protein_coding	chrNC_000845.1:2274-3844:+
gene24596	735	9.88449	80193	1063.75	0.00929216	-6.74977	0	0	down	yes	DES	protein_coding	chrNC_010457.5:121428539-121435426:+
gene9133	31410	422.411	150521	1996.63	0.211562	-2.24085	0	0	down	yes	MYL6	protein_coding	chrNC_010447.5:21559226-21562418:+
gene23975	80478	1082.29	3998	53.0327	20.408	4.35106	0	0	up	yes	ACSL1	protein_coding	chrNC_010457.5:45866858-45936327:-
gene2096	48378	650.601	179537	2381.52	0.273187	-1.87204	0	0	down	yes	TNC	protein_coding	chrNC_010443.5:255533235-255630381:-
gene1857	10503	141.247	91737	1216.87	0.116074	-3.10688	0	0	down	yes	TPM2	protein_coding	chrNC_010443.5:236402249-236410390:-
gene6316	1325	17.819	62744	832.287	0.0214096	-5.5456	0	0	down	yes	ACTG2	protein_coding	chrNC_010445.4:69097366-69121542:-
gene18070	60520	813.89	187419	2486.08	0.327379	-1.61097	0	0	down	yes	ITGB1	protein_coding	chrNC_010452.4:56078393-56130608:-
gene17160	67998	914.457	4265	56.5744	16.1638	4.01469	0	0	up	yes	CD36	protein_coding	chrNC_010451.4:99685748-99782296:-
gene17228	134107	1803.51	33559	445.154	4.05143	2.01843	0	0	up	yes	LAMB1	protein_coding	chrNC_010451.4:107670120-107747242:-
gene5184	51795	696.554	169171	2244.02	0.310404	-1.68778	0	0	down	yes	ACTB	protein_coding	chrNC_010445.4:4084275-4090383:-
gene10461	110267	1482.9	23054	305.807	4.84914	2.27773	0	0	up	yes	MMP2	protein_coding	chrNC_010448.4:30059247-30087031:-
gene10885	60112	808.403	2762	36.6374	22.065	4.46369	0	0	up	yes	APOE	protein_coding	chrNC_010448.4:51373113-51375333:+
gene21146	55562	747.214	1610	21.3563	34.9879	5.12878	0	0	up	yes	PTX3	protein_coding	chrNC_010455.5:97273594-97279570:+
gene22100	55717	749.298	4345	57.6356	13.0006	3.70051	0	0	up	yes	LPL	protein_coding	chrNC_010456.5:4104761-4134964:+
gene4537	103620	1393.51	25929	343.943	4.05157	2.01848	0	0	up	yes	VCAN	protein_coding	chrNC_010444.4:91682177-91811674:+
gene26622	6500	87.4139	61753	819.142	0.106714	-3.22818	0	0	down	yes	CAV1	protein_coding	chrNC_010460.4:29648120-29682451:-
gene13777	19729	265.321	90622	1202.08	0.220718	-2.17973	0	0	down	yes	IQGAP1	protein_coding	chrNC_010449.5:53020479-53129964:+
gene7379	55265	743.219	5090	67.5179	11.0077	3.46045	0	0	up	yes	FABP4	protein_coding	chrNC_010446.5:55096400-55101209:+
gene3292	44411	597.252	618	8.19765	72.8564	6.18698	0	0	up	yes	SPON1	protein_coding	chrNC_010444.4:44967982-45299677:-
gene28036	29798	400.732	110130	1460.85	0.274314	-1.8661	0	0	down	yes	FLNA	protein_coding	chrNC_010461.5:124889934-124915000:+
gene23830	20625	277.371	90265	1197.35	0.231654	-2.10995	0	0	down	yes	ACTR3	protein_coding	chrNC_010457.5:20104808-20171721:+
gene9617	120932	1626.33	246573	3270.74	0.497235	-1.008	0	0	down	yes	GAPDH	protein_coding	chrNC_010447.5:64129678-64135194:-
gene12144	19561	263.062	83050	1101.64	0.238791	-2.06618	0	0	down	yes	LOC733637	protein_coding	chrNC_010448.4:103413841-103424790:-
gene18706	64645	869.364	12006	159.257	5.45887	2.4486	0	0	up	yes	COL4A2	protein_coding	chrNC_010453.5:76996885-77161617:+
rna78601	46429	624.39	4655	61.7477	10.112	3.33799	0	0	up	yes	rna78601	protein_coding	chrNC_000845.1:1246-2205:+
gene6251	5345	71.8811	48054	637.427	0.112768	-3.14858	0	0	down	yes	CAPG	protein_coding	chrNC_010445.4:59335483-59366855:+
gene7642	50340	676.987	6672	88.5028	7.64932	2.93533	0	0	up	yes	ALDH9A1	protein_coding	chrNC_010446.5:85029914-85057650:+
gene24756	63043	847.82	12622	167.428	5.06378	2.34021	0	0	up	yes	COL6A3	protein_coding	chrNC_010457.5:137011549-137103687:-
gene17146	2774	37.3055	39108	518.76	0.0719129	-3.79761	0	0	down	yes	SEMA3D	protein_coding	chrNC_010451.4:95280637-95486109:+
gene19619	46376	623.678	6499	86.208	7.23457	2.85491	0	0	up	yes	ACACA	protein_coding	chrNC_010454.4:38580916-38875067:-
gene23844	49408	664.453	7922	105.084	6.32307	2.66063	0	0	up	yes	DBI	protein_coding	chrNC_010457.5:24895575-24900710:+
gene3250	40929	550.425	109497	1452.46	0.378961	-1.39988	0	0	down	yes	LDHA	protein_coding	chrNC_010444.4:40814163-40827284:-
gene5691	52431	705.107	10336	137.105	5.14282	2.36256	0	0	up	yes	ARL6IP1	protein_coding	chrNC_010445.4:26759365-26770325:+
gene27388	14122	189.917	60545	803.118	0.236474	-2.08025	0	0	down	yes	MSN	protein_coding	chrNC_010461.5:51844197-51967674:+
gene835	76835	1033.3	159226	2112.1	0.489228	-1.03142	0	0	down	yes	ANXA2	protein_coding	chrNC_010443.5:111588721-111635064:+
gene10563	32355	435.119	3109	41.2403	10.5508	3.39928	0	0	up	yes	CEBPA	protein_coding	chrNC_010448.4:43083200-43085884:-
gene13447	28336	381.071	1813	24.0491	15.8455	3.986	0	0	up	yes	FKBP5	protein_coding	chrNC_010449.5:31441764-31550704:-
gene1789	43715	587.892	107732	1429.04	0.411388	-1.28143	0	0	down	yes	ANXA1	protein_coding	chrNC_010443.5:226414200-226431963:+
gene13828	25180	338.628	271	3.59476	94.2003	6.55766	0	0	up	yes	PLIN1	protein_coding	chrNC_010449.5:55237517-55250797:-
gene8874	6190	83.2449	39518	524.199	0.158804	-2.65468	0	0	down	yes	TUBA1A	protein_coding	chrNC_010447.5:15186059-15190211:-
gene18825	24356	327.546	74886	993.349	0.32974	-1.6006	0	0	down	yes	ACTG1	protein_coding	chrNC_010454.4:1320355-1323219:+
gene27715	10357	139.284	48533	643.781	0.216353	-2.20854	0	0	down	yes	PLS3	protein_coding	chrNC_010461.5:94885098-94971664:+
gene16861	18795	252.761	64870	860.488	0.293741	-1.76738	0	0	down	yes	FMOD	protein_coding	chrNC_010451.4:64062995-64073853:-
gene6611	33239	447.008	4005	53.1256	8.41417	3.07282	0	0	up	yes	LOC100625479	protein_coding	chrNC_010445.4:102195743-102205687:+
gene21905	27601	371.186	1937	25.6939	14.4464	3.85264	0	0	up	yes	SLC5A3	protein_coding	chrNC_010455.5:197688632-197723323:+
gene9444	28350	381.259	2394	31.756	12.0059	3.58567	0	0	up	yes	MGST1	protein_coding	chrNC_010447.5:56259566-56283823:-
gene13292	4239	57.0073	33581	445.446	0.127978	-2.96603	0	0	down	yes	CLIC1	protein_coding	chrNC_010449.5:23842829-23851162:-
gene7283	6822	91.7442	39565	524.822	0.17481	-2.51614	0	0	down	yes	SDC2	protein_coding	chrNC_010446.5:40003618-40129483:-
gene7382	29871	401.714	3245	43.0443	9.33256	3.22227	0	0	up	yes	FABP5	protein_coding	chrNC_010446.5:55277831-55282585:-
gene15348	7794	104.816	41232	546.935	0.191643	-2.38351	0	0	down	yes	SFRP2	protein_coding	chrNC_010450.4:75337311-75345926:+
gene3113	44208	594.522	9718	128.907	4.61201	2.20539	0	0	up	yes	HSD17B12	protein_coding	chrNC_010444.4:18461487-18611761:-
gene14602	31421	422.559	84060	1115.04	0.378963	-1.39987	0	0	down	yes	CALM1	protein_coding	chrNC_010449.5:112160823-112171754:+
gene9412	34416	462.836	5226	69.3219	6.67662	2.73912	0	0	up	yes	ABCC9	protein_coding	chrNC_010447.5:51536531-51673583:+
gene12089	4284	57.6125	32635	432.897	0.133086	-2.90957	0	0	down	yes	TUBB6	protein_coding	chrNC_010448.4:97233639-97240692:-
gene22808	35308	474.832	6010	79.7215	5.95613	2.57438	0	0	up	yes	NID1	protein_coding	chrNC_010456.5:55239327-55346948:+
gene1990	34818	468.242	6029	79.9735	5.85497	2.54966	0	0	up	yes	ABCA1	protein_coding	chrNC_010443.5:246144277-246278492:-
gene13730	16041	215.724	54728	725.957	0.297158	-1.7507	0	0	down	yes	CEMIP	protein_coding	chrNC_010449.5:49622534-49792547:+
gene2472	6381	85.8135	35204	466.974	0.183765	-2.44407	0	0	down	yes	CD151	protein_coding	chrNC_010444.4:525000-529568:+
gene18420	46265	622.185	12246	162.441	3.83022	1.93743	0	0	up	yes	ITM2B	protein_coding	chrNC_010453.5:19349088-19377931:-
gene8872	33457	449.939	83398	1106.26	0.406722	-1.29789	0	0	down	yes	TUBA1B	protein_coding	chrNC_010447.5:15150229-15153620:-
gene6668	3899	52.4349	28924	383.671	0.136666	-2.87127	0	0	down	yes	LBH	protein_coding	chrNC_010445.4:109078285-109113536:-
gene16339	19559	263.035	716	9.4976	27.6949	4.79155	0	0	up	yes	FZD4	protein_coding	chrNC_010451.4:20714995-20721460:-
gene8361	21098	283.732	62153	824.448	0.344148	-1.5389	0	0	down	yes	SARS	protein_coding	chrNC_010446.5:110857067-110874712:-
gene22144	76905	1034.24	31162	413.358	2.50204	1.32311	0	0	up	yes	LOXL2	protein_coding	chrNC_010456.5:7435861-7540699:-
gene14112	87282	1173.79	38370	508.971	2.30621	1.20552	0	0	up	yes	MMP14	protein_coding	chrNC_010449.5:76174502-76185931:-
gene3976	18447	248.081	617	8.18439	30.3114	4.92179	0	0	up	yes	COL5A3	protein_coding	chrNC_010444.4:68828197-68869914:-
gene26541	2548	34.2662	24120	319.947	0.1071	-3.22297	0	0	down	yes	FLNC	protein_coding	chrNC_010460.4:19759734-19787616:-
gene8135	60105	808.309	21667	287.409	2.8124	1.4918	0	0	up	yes	TXNIP	protein_coding	chrNC_010446.5:99348589-99351760:+
gene9581	39509	531.328	10043	133.218	3.9884	1.99581	0	0	up	yes	C1S	protein_coding	chrNC_010447.5:63670309-63681466:-
gene12332	29247	393.322	5198	68.9505	5.70441	2.51208	0	0	up	yes	PTGFR	protein_coding	chrNC_010448.4:134727334-134777067:-
gene8276	7037	94.6356	33441	443.589	0.213341	-2.22877	0	0	down	yes	RHOC	protein_coding	chrNC_010446.5:107731713-107737705:+
gene19267	51274	689.547	17130	227.226	3.03463	1.60152	0	0	up	yes	ACLY	protein_coding	chrNC_010454.4:20796678-20841301:+
gene14840	11423	153.62	41994	557.042	0.275777	-1.85842	0	0	down	yes	WDR1	protein_coding	chrNC_010450.4:6413338-6452383:-
gene3181	29478	396.429	71957	954.496	0.415328	-1.26768	0	0	down	yes	RCN1	protein_coding	chrNC_010444.4:28696528-28714083:-
gene20364	22437	301.739	2727	36.1731	8.34153	3.06031	0	0	up	yes	ACAA1	protein_coding	chrNC_010455.5:22964844-23020138:-
gene23007	80687	1085.1	36685	486.62	2.22988	1.15696	0	0	up	yes	PSAP	protein_coding	chrNC_010456.5:74734185-74820645:-
gene9948	26875	361.423	4770	63.2731	5.7121	2.51402	0	0	up	yes	LUM	protein_coding	chrNC_010447.5:91748871-91756381:+
gene22273	6697	90.0632	31565	418.704	0.2151	-2.21692	0	0	down	yes	PALLD	protein_coding	chrNC_010456.5:20678456-21020125:-
gene17982	2758	37.0904	22032	292.25	0.126913	-2.97809	0	0	down	yes	ITGA8	protein_coding	chrNC_010452.4:46132887-46303659:+
gene24932	22176	298.229	3008	39.9006	7.47431	2.90194	0	0	up	yes	SLC1A3	protein_coding	chrNC_010458.4:21873691-21965315:+
gene8814	13206	177.598	43180	572.775	0.310066	-1.68935	0	0	down	yes	MYH9	protein_coding	chrNC_010447.5:11365603-11456475:+
gene9102	15924	214.15	736	9.7629	21.9351	4.45517	0	0	up	yes	ITGA7	protein_coding	chrNC_010447.5:21126565-21150875:-
gene7997	7383	99.2887	31946	423.758	0.234305	-2.09354	0	0	down	yes	S100A6	protein_coding	chrNC_010446.5:96098264-96099686:+
gene23340	30984	416.682	71524	948.752	0.439189	-1.18709	0	0	down	yes	PGAM1	protein_coding	chrNC_010456.5:108822782-108832818:+
gene19785	40924	550.358	12724	168.781	3.26077	1.70521	0	0	up	yes	CPD	protein_coding	chrNC_010454.4:46462203-46533032:+
gene2811	48243	648.786	17087	226.656	2.86243	1.51724	0	0	up	yes	FTH1	protein_coding	chrNC_010444.4:9535051-9537979:+
gene17636	43175	580.63	89413	1186.05	0.489551	-1.03047	0	0	down	yes	ENAH	protein_coding	chrNC_010452.4:13439772-13609347:-
gene309	22859	307.414	3667	48.6421	6.31993	2.65991	0	0	up	yes	LAMA2	protein_coding	chrNC_010443.5:33765412-34359741:-
gene7401	3409	45.8452	22301	295.819	0.154977	-2.68987	0	0	down	yes	PKIA	protein_coding	chrNC_010446.5:57872114-57879184:-
gene8941	30840	414.745	7737	102.63	4.04117	2.01477	0	0	up	yes	KRT5	protein_coding	chrNC_010447.5:17862047-17868397:-
gene599	31583	424.737	8288	109.939	3.8634	1.94987	0	0	up	yes	REV3L	protein_coding	chrNC_010443.5:77196592-77400551:-
gene25291	19295	259.485	2507	33.2549	7.8029	2.96401	0	0	up	yes	EBF1	protein_coding	chrNC_010458.4:64357999-64753188:+
gene21766	11071	148.886	37311	494.923	0.300826	-1.733	0	0	down	yes	VGLL3	protein_coding	chrNC_010455.5:168790024-168839962:+
gene8550	6610	88.8932	28444	377.304	0.235601	-2.08558	0	0	down	yes	CYR61	protein_coding	chrNC_010446.5:130392404-130395179:-
gene4474	17590	236.555	1978	26.2378	9.01582	3.17246	0	0	up	yes	F2RL2	protein_coding	chrNC_010444.4:85534188-85542062:-
gene21354	13087	175.998	282	3.74068	47.0497	5.55611	0	0	up	yes	ADIPOQ	protein_coding	chrNC_010455.5:124633906-124646237:+
gene24072	9845	132.398	34306	455.063	0.290945	-1.78118	0	0	down	yes	PLEKHB2	protein_coding	chrNC_010457.5:57428259-57489051:+
gene27162	18414	247.637	2445	32.4325	7.63546	2.93271	0	0	up	yes	SRPX	protein_coding	chrNC_010461.5:34075577-34198462:-
gene28593	59153	795.506	25967	344.447	2.30952	1.20759	0	0	up	yes	SLC25A6	protein_coding	chrNW_018084901.1:792985-795766:-
gene15654	17981	241.814	47901	635.398	0.38057	-1.39376	0	0	down	yes	H2AFZ	protein_coding	chrNC_010450.4:120563752-120566023:+
gene25035	14626	196.695	42247	560.398	0.350991	-1.5105	0	0	down	yes	SNX18	protein_coding	chrNC_010458.4:33776964-33801391:+
gene19736	15083	202.84	1249	16.5677	12.2431	3.6139	0	0	up	yes	ALDOC	protein_coding	chrNC_010454.4:44823376-44827273:-
gene26705	12267	164.97	38171	506.331	0.325815	-1.61788	0	0	down	yes	GARS	protein_coding	chrNC_010460.4:42311711-42352201:-
gene4300	3875	52.1121	21859	289.956	0.179724	-2.47614	0	0	down	yes	CNN2	protein_coding	chrNC_010444.4:77376020-77385594:-
gene16281	13415	180.409	68	0.902007	200.008	7.64391	0	0	up	yes	THRSP	protein_coding	chrNC_010451.4:12479913-12484323:+
gene15585	15375	206.767	1463	19.4064	10.6546	3.4134	0	0	up	yes	ELOVL6	protein_coding	chrNC_010450.4:112038670-112190079:+
gene16999	14794	198.954	42001	557.135	0.357102	-1.48559	0	0	down	yes	PEG10	protein_coding	chrNC_010451.4:74474121-74486983:+
gene6716	16162	217.351	2003	26.5694	8.1805	3.03219	0	0	up	yes	SLC5A6	protein_coding	chrNC_010445.4:111919298-111930944:+
gene1691	15541	209	1778	23.5848	8.86162	3.14757	0	0	up	yes	NFIB	protein_coding	chrNC_010443.5:208182397-208427504:+
gene4035	287	3.85966	11469	152.134	0.0253701	-5.30073	0	0	down	yes	CNN1	protein_coding	chrNC_010444.4:70183370-70190756:+
gene10209	23805	320.136	54923	728.543	0.43942	-1.18633	0	0	down	yes	AARS	protein_coding	chrNC_010448.4:13298336-13321423:-
gene25593	11607	156.094	35313	468.42	0.333235	-1.58539	0	0	down	yes	DSTN	protein_coding	chrNC_010459.5:25998830-26050354:+
gene23276	4753	63.9197	22342	296.362	0.215681	-2.21303	0	0	down	yes	MYOF	protein_coding	chrNC_010456.5:104770514-104941212:-
gene20682	11102	149.303	161	2.13563	69.9103	6.12743	0	0	up	yes	IL17RD	protein_coding	chrNC_010455.5:38935631-39006721:-
gene25348	16286	219.019	42807	567.827	0.385714	-1.3744	0	0	down	yes	ANXA6	protein_coding	chrNC_010458.4:71857229-71913723:+
gene20429	15537	208.946	1997	26.4898	7.88778	2.97962	0	0	up	yes	ABHD5	protein_coding	chrNC_010455.5:27006331-27053760:+
gene4814	12785	171.936	36804	488.198	0.352186	-1.50559	0	0	down	yes	HSPA4	protein_coding	chrNC_010444.4:135345724-135391112:+
gene1479	9826	132.143	31528	418.213	0.31597	-1.66214	0	0	down	yes	LGALS3	protein_coding	chrNC_010443.5:184478639-184496155:+
gene6141	26014	349.844	7247	96.1301	3.63927	1.86365	0	0	up	yes	IL1R1	protein_coding	chrNC_010445.4:52192912-52334734:-
gene21374	13524	181.875	37394	496.024	0.366665	-1.44747	0	0	down	yes	LPP	protein_coding	chrNC_010455.5:125782373-126478927:+
gene22226	60344	811.523	29444	390.569	2.0778	1.05505	0	0	up	yes	CTSB	protein_coding	chrNC_010456.5:15014139-15035081:-
gene23022	21577	290.174	50047	663.864	0.437098	-1.19397	0	0	down	yes	P4HA1	protein_coding	chrNC_010456.5:75827207-75919121:-
gene15919	2613	35.1404	16717	221.748	0.15847	-2.65772	0	0	down	yes	CAVIN3	protein_coding	chrNC_010451.4:3378144-3379851:+
gene7766	6098	82.0076	24056	319.098	0.256998	-1.96017	0	0	down	yes	PEA15	protein_coding	chrNC_010446.5:90263600-90276142:-
gene23360	1090	14.6586	12737	168.954	0.0867611	-3.52681	0	0	down	yes	LOXL4	protein_coding	chrNC_010456.5:109571942-109593408:-
gene11808	14567	195.901	38831	515.086	0.380327	-1.39469	0	0	down	yes	CLIC4	protein_coding	chrNC_010448.4:82401041-82483038:+
gene25134	18722	251.779	3738	49.5839	5.07784	2.34421	0	0	up	yes	PIK3R1	protein_coding	chrNC_010458.4:46434757-46523626:+
gene7906	2574	34.6159	16434	217.994	0.158793	-2.65478	0	0	down	yes	ARHGEF2	protein_coding	chrNC_010446.5:94026391-94082206:+
gene20852	11118	149.518	642	8.51601	17.5573	4.134	0	0	up	yes	PPARG	protein_coding	chrNC_010455.5:68301566-68433951:+
gene6253	17522	235.641	3341	44.3177	5.31708	2.41063	0	0	up	yes	RETSAT	protein_coding	chrNC_010445.4:59401161-59416829:+
gene24992	36494	490.782	14015	185.906	2.63994	1.40051	0	0	up	yes	HMGCS1	protein_coding	chrNC_010458.4:27936225-27957261:-
gene17156	3922	52.7442	19091	253.239	0.208279	-2.26341	0	0	down	yes	SEMA3C	protein_coding	chrNC_010451.4:99114649-99432683:+
gene11759	22917	308.194	51123	678.137	0.454472	-1.13774	0	0	down	yes	CDC42	protein_coding	chrNC_010448.4:80035034-80089243:+
gene15452	9833	132.237	30223	400.902	0.329848	-1.60013	0	0	down	yes	PCDH18	protein_coding	chrNC_010450.4:89321487-89335406:+
gene25535	14770	198.631	2192	29.0765	6.83134	2.77217	0	0	up	yes	CDS2	protein_coding	chrNC_010459.5:14151810-14220841:+
gene20932	10405	139.929	533	7.07014	19.7916	4.30682	0	0	up	yes	ACKR4	protein_coding	chrNC_010455.5:73773862-73777770:+
gene28142	2293	30.8369	15111	200.445	0.153843	-2.70047	0	0	down	yes	LOC110257905	protein_coding	chrNC_010462.3:10163547-10165732:+
gene7777	9584	128.888	29424	390.304	0.330226	-1.59848	0	0	down	yes	TAGLN2	protein_coding	chrNC_010446.5:90566272-90574762:+
gene13686	18807	252.922	4156	55.1286	4.58786	2.19782	0	0	up	yes	ELOVL5	protein_coding	chrNC_010449.5:46860768-46932945:-
gene20692	4627	62.2252	20037	265.787	0.234117	-2.0947	0	0	down	yes	SLMAP	protein_coding	chrNC_010455.5:39571930-39720229:+
gene13291	381	5.1238	9707	128.762	0.0397929	-4.65134	0	0	down	yes	DDAH2	protein_coding	chrNC_010449.5:23838993-23842514:-
gene9553	698	9.3869	10512	139.44	0.0673187	-3.89285	0	0	down	yes	MFAP5	protein_coding	chrNC_010447.5:62742520-62757522:+
gene9840	39862	536.076	16928	224.547	2.38737	1.25542	0	0	up	yes	IGF1	protein_coding	chrNC_010447.5:81762027-81909253:+
gene10806	8971	120.645	230	3.05091	39.5438	5.30538	0	0	up	yes	LIPE	protein_coding	chrNC_010448.4:49543671-49560126:+
gene23100	14417	193.884	36586	485.306	0.399508	-1.3237	0	0	down	yes	GHITM	protein_coding	chrNC_010456.5:85385578-85401680:+
gene27204	25544	343.523	8303	110.138	3.11903	1.6411	0	0	up	yes	MAOA	protein_coding	chrNC_010461.5:38930452-39006220:+
gene12429	5909	79.4659	21674	287.502	0.276402	-1.85516	0	0	down	yes	DOCK7	protein_coding	chrNC_010448.4:149745375-149971853:+
gene9220	13787	185.412	2248	29.8193	6.21784	2.63641	0	0	up	yes	SLC16A7	protein_coding	chrNC_010447.5:24713009-24871891:+
gene19800	11462	154.144	1325	17.5759	8.77022	3.13261	0	0	up	yes	RFLNB	protein_coding	chrNC_010454.4:47307657-47316652:+
gene22854	3925	52.7845	17583	233.235	0.226315	-2.1436	0	0	down	yes	C14H1orf198	protein_coding	chrNC_010456.5:59516754-59553705:+
gene19378	7607	102.301	24551	325.664	0.31413	-1.67056	0	0	down	yes	LASP1	protein_coding	chrNC_010454.4:23222706-23267209:-
gene14968	9927	133.501	783	10.3863	12.8535	3.68409	0	0	up	yes	KLB	protein_coding	chrNC_010450.4:30653434-30696123:+
gene10790	1275	17.1466	11422	151.511	0.113171	-3.14343	0	0	down	yes	AXL	protein_coding	chrNC_010448.4:49245802-49277917:+
gene15686	3587	48.239	16667	221.085	0.218192	-2.19633	0	0	down	yes	PDLIM5	protein_coding	chrNC_010450.4:125044027-125259969:-
gene5242	12036	161.864	31775	421.489	0.384028	-1.38072	0	0	down	yes	ARPC1B	protein_coding	chrNC_010445.4:6329737-6342641:+
gene2416	9315	125.271	27142	360.034	0.347942	-1.52308	0	0	down	yes	COL5A1	protein_coding	chrNC_010443.5:273934219-274083264:+
gene8552	1302	17.5097	11310	150.025	0.116712	-3.09898	0	0	down	yes	DDAH1	protein_coding	chrNC_010446.5:130485305-130617534:+
gene17214	8560	115.117	394	5.22634	22.0264	4.46116	0	0	up	yes	PRKAR2B	protein_coding	chrNC_010451.4:106851044-106957519:+
gene7728	9335	125.54	670	8.88742	14.1255	3.82024	0	0	up	yes	ADAMTS4	protein_coding	chrNC_010446.5:89260354-89269238:+
gene14988	1636	22.0014	12077	160.199	0.137338	-2.8642	0	0	down	yes	UCHL1	protein_coding	chrNC_010450.4:32353766-32367288:+
gene24491	36701	493.566	15915	211.109	2.33796	1.22525	0	0	up	yes	IDH1	protein_coding	chrNC_010457.5:111341153-111362330:-
gene24531	13669	183.825	2452	32.5253	5.65174	2.49869	0	0	up	yes	PECR	protein_coding	chrNC_010457.5:118296359-118335886:-
gene2250	24932	335.293	8476	112.433	2.98217	1.57636	0	0	up	yes	ANGPTL2	protein_coding	chrNC_010443.5:267639636-267672918:-
gene10128	11655	156.74	30774	408.211	0.383967	-1.38094	0	0	down	yes	HSBP1	protein_coding	chrNC_010448.4:4795203-4798158:-
gene25768	22500	302.586	7068	93.7557	3.22739	1.69037	0	0	up	yes	ID1	protein_coding	chrNC_010459.5:35316518-35317742:+
gene19935	8149	109.59	24804	329.02	0.33308	-1.58606	0	0	down	yes	KIF1C	protein_coding	chrNC_010454.4:51899762-51924465:-
gene19940	16798	225.904	38701	513.361	0.440049	-1.18426	0	0	down	yes	PFN1	protein_coding	chrNC_010454.4:51962642-51965570:+
gene8854	1101	14.8066	10503	139.32	0.106277	-3.2341	0	0	down	yes	C5H12orf75	protein_coding	chrNC_010447.5:14720117-14755750:-
gene12471	11713	157.52	1666	22.0992	7.12786	2.83347	0	0	up	yes	PLPP3	protein_coding	chrNC_010448.4:155800838-155894919:+
gene5580	9003	121.075	634	8.40989	14.3967	3.84767	0	0	up	yes	SULT1A3	protein_coding	chrNC_010445.4:18351205-18354653:+
gene25350	8243	110.854	375	4.9743	22.2854	4.47803	0	0	up	yes	GPX3	protein_coding	chrNC_010458.4:71980467-71989011:-
gene24547	6902	92.8201	22358	296.575	0.312974	-1.67589	0	0	down	yes	ARPC2	protein_coding	chrNC_010457.5:120297122-120328795:+
gene6018	7663	103.054	23616	313.262	0.328972	-1.60397	0	0	down	yes	ASPN	protein_coding	chrNC_010445.4:42165553-42192902:-
gene1936	23089	310.507	7734	102.59	3.02668	1.59774	0	0	up	yes	COL15A1	protein_coding	chrNC_010443.5:240718128-240829188:+
gene16449	947	12.7355	9659	128.125	0.0993994	-3.33062	0	0	down	yes	MMP1	protein_coding	chrNC_010451.4:33411738-33420205:-
gene262	13933	187.375	2868	38.0435	4.92528	2.30021	0	0	up	yes	SGK1	protein_coding	chrNC_010443.5:29625786-29753619:+
gene1800	1702	22.889	11562	153.368	0.149242	-2.74427	0	0	down	yes	OSTF1	protein_coding	chrNC_010443.5:228142159-228196808:+
gene14503	1426	19.1773	10848	143.897	0.133271	-2.90757	0	0	down	yes	LTBP2	protein_coding	chrNC_010449.5:97744974-97852848:-
gene12377	2157	29.008	12556	166.553	0.174167	-2.52146	0	0	down	yes	CTH	protein_coding	chrNC_010448.4:142454922-142486352:-
gene21900	16448	221.197	4183	55.4867	3.98649	1.99512	0	0	up	yes	ITSN1	protein_coding	chrNC_010455.5:197301515-197492537:+
gene26664	16386	220.364	36954	490.188	0.449549	-1.15345	0	0	down	yes	SEPT7	protein_coding	chrNC_010460.4:38082626-38183354:-
gene15534	1929	25.9417	11894	157.772	0.164426	-2.60449	0	0	down	yes	USP53	protein_coding	chrNC_010450.4:104500204-104560711:-
gene13978	5328	71.6525	18801	249.392	0.287309	-1.79933	0	0	down	yes	CFL2	protein_coding	chrNC_010449.5:65090170-65094521:+
gene17238	3374	45.3745	14949	198.296	0.228823	-2.1277	0	0	down	yes	EPDR1	protein_coding	chrNC_010451.4:108417997-108447180:+
gene19632	7620	102.476	385	5.10695	20.066	4.32668	0	0	up	yes	LOC110256043	protein_coding	chrNC_010454.4:39364414-39433654:-
gene5556	9392	126.306	25732	341.33	0.370041	-1.43424	0	0	down	yes	MVP	protein_coding	chrNC_010445.4:18056548-18081169:+
gene23092	14482	194.758	33771	447.966	0.434761	-1.20171	0	0	down	yes	FAM213A	protein_coding	chrNC_010456.5:82249450-82271227:+
gene24974	7923	106.551	513	6.80485	15.6581	3.96883	0	0	up	yes	GHR	protein_coding	chrNC_010458.4:27126300-27422618:+
gene6483	5955	80.0845	19736	261.794	0.305906	-1.70884	0	0	down	yes	RTN4	protein_coding	chrNC_010445.4:86180022-86252126:+
gene8491	10736	144.381	1615	21.4227	6.73963	2.75267	0	0	up	yes	TGFBR3	protein_coding	chrNC_010446.5:125109939-125310788:+
gene24942	9625	129.44	1182	15.679	8.25561	3.04537	0	0	up	yes	LOC102167255	protein_coding	chrNC_010458.4:23627700-23672724:-
gene26674	6872	92.4166	106	1.40607	65.7269	6.03841	0	0	up	yes	BMPER	protein_coding	chrNC_010460.4:39417830-39664010:-
gene2606	7976	107.264	579	7.68033	13.966	3.80385	0	0	up	yes	PC	protein_coding	chrNC_010444.4:5566608-5587797:+
gene24906	3710	49.8931	15314	203.137	0.245613	-2.02554	0	0	down	yes	RAI14	protein_coding	chrNC_010458.4:20268728-20435846:+
gene14433	13188	177.356	31268	414.764	0.427607	-1.22564	0	0	down	yes	ACTN1	protein_coding	chrNC_010449.5:92550132-92644842:-
gene12339	1284	17.2676	9892	131.216	0.131597	-2.9258	0	0	down	yes	NEXN	protein_coding	chrNC_010448.4:135315000-135382911:-
gene19774	7819	105.152	587	7.78644	13.5045	3.75537	0	0	up	yes	SSH2	protein_coding	chrNC_010454.4:45818103-46085720:-
gene26623	2567	34.5217	12780	169.524	0.203639	-2.29591	0	0	down	yes	CAV2	protein_coding	chrNC_010460.4:29699012-29707277:-
gene9947	36481	490.607	17307	229.574	2.13703	1.09561	0	0	up	yes	DCN	protein_coding	chrNC_010447.5:91678601-91713925:+
gene12771	1396	18.7738	10079	133.696	0.140422	-2.83216	0	0	down	yes	LOC100624785	protein_coding	chrNC_010449.5:1910585-1914668:-
gene12164	13108	176.28	2860	37.9374	4.64661	2.21618	0	0	up	yes	COLEC12	protein_coding	chrNC_010448.4:105808157-106000197:+
gene12337	3184	42.8193	13876	184.063	0.232635	-2.10386	0	0	down	yes	DNAJB4	protein_coding	chrNC_010448.4:135243927-135281376:-
gene17396	8802	118.372	1020	13.5301	8.74877	3.12908	0	0	up	yes	RGL1	protein_coding	chrNC_010451.4:124848358-125143014:+
gene2030	18648	250.784	38912	516.16	0.485864	-1.04138	0	0	down	yes	TXN	protein_coding	chrNC_010443.5:251264180-251278000:-
gene7971	10989	147.783	27325	362.461	0.407722	-1.29434	0	0	down	yes	TPM3	protein_coding	chrNC_010446.5:95542329-95572946:+
gene14616	3067	41.2459	13234	175.547	0.234957	-2.08953	0	0	down	yes	NDUFB1	protein_coding	chrNC_010449.5:113652772-113659937:-
gene26055	9643	129.682	1508	20.0033	6.48301	2.69666	0	0	up	yes	PTGIS	protein_coding	chrNC_010459.5:51153151-51200515:-
gene15279	697	9.37345	7742	102.696	0.0912737	-3.45366	0	0	down	yes	AMCF-II	protein_coding	chrNC_010450.4:70008225-70010360:+
gene4345	10516	141.422	1924	25.5215	5.5413	2.47022	0	0	up	yes	GFPT2	protein_coding	chrNC_010444.4:78285208-78328288:+
gene18785	10270	138.114	1837	24.3675	5.66796	2.50283	0	0	up	yes	FASN	protein_coding	chrNC_010454.4:922405-937560:+
gene6631	2283	30.7024	11396	151.166	0.203104	-2.29971	0	0	down	yes	CRIM1	protein_coding	chrNC_010445.4:103612231-103815493:-
gene13711	27275	366.802	11884	157.639	2.32685	1.21838	0	0	up	yes	CTSH	protein_coding	chrNC_010449.5:48084882-48106072:-
gene13574	24281	326.538	9952	132.011	2.47356	1.30659	0	0	up	yes	PTK7	protein_coding	chrNC_010449.5:38135675-38205662:+
gene25454	711	9.56173	7500	99.4861	0.0961112	-3.37915	0	0	down	yes	ZDHHC2	protein_coding	chrNC_010459.5:4855129-4928109:+
gene4852	13641	183.448	3609	47.8727	3.832	1.9381	0	0	up	yes	CXCL14	protein_coding	chrNC_010444.4:137803988-137813118:-
gene22520	33979	456.959	16671	221.138	2.0664	1.04712	0	0	up	yes	MLEC	protein_coding	chrNC_010456.5:40601982-40617382:+
gene14705	9065	121.909	23270	308.672	0.394946	-1.34027	0	0	down	yes	WARS	protein_coding	chrNC_010449.5:121212981-121238144:-
gene10112	2160	29.0483	10881	144.334	0.201257	-2.31289	0	0	down	yes	WFDC1	protein_coding	chrNC_010448.4:4333729-4365122:-
gene567	8966	120.577	1392	18.4646	6.53018	2.70712	0	0	up	yes	SESN1	protein_coding	chrNC_010443.5:75056731-75170374:-
gene23461	12370	166.355	3021	40.073	4.15131	2.05357	0	0	up	yes	SH3PXD2A	protein_coding	chrNC_010456.5:114515459-114777251:-
gene8900	6128	82.4111	318	4.21821	19.537	4.28814	0	0	up	yes	GPD1	protein_coding	chrNC_010447.5:16008179-16021676:+
gene18076	20613	277.21	7821	103.744	2.67205	1.41795	0	0	up	yes	NRP1	protein_coding	chrNC_010452.4:56280673-56430832:-
gene1471	3887	52.2735	14196	188.307	0.277597	-1.84894	0	0	down	yes	SAMD4A	protein_coding	chrNC_010443.5:183915337-184140122:+
gene7875	776	10.4359	7472	99.1147	0.105291	-3.24755	0	0	down	yes	NES	protein_coding	chrNC_010446.5:93412660-93421899:+
gene26691	2030	27.3	10452	138.644	0.196908	-2.34441	0	0	down	yes	PDE1C	protein_coding	chrNC_010460.4:40818316-41410555:+
gene21041	7909	106.362	1007	13.3577	7.96266	2.99325	0	0	up	yes	PLSCR4	protein_coding	chrNC_010455.5:86542279-86573665:-
gene2734	5065	68.1156	16305	216.283	0.314938	-1.66686	0	0	down	yes	PPP1R14B	protein_coding	chrNC_010444.4:7865445-7867878:+
gene8003	5944	79.9366	288	3.82027	20.9244	4.38711	0	0	up	yes	S100A9	protein_coding	chrNC_010446.5:96236114-96238989:-
gene6364	19263	259.054	7152	94.8699	2.73063	1.44923	0	0	up	yes	ANXA4	protein_coding	chrNC_010445.4:72623311-72654591:-
gene1785	5429	73.0107	108	1.4326	50.9638	5.6714	0	0	up	yes	ALDH1A1	protein_coding	chrNC_010443.5:226163347-226217342:-
gene26660	2656	35.7186	11516	152.758	0.233826	-2.09649	0	0	down	yes	ANLN	protein_coding	chrNC_010460.4:37647952-37710939:-
gene2754	14295	192.243	30558	405.346	0.474269	-1.07622	0	0	down	yes	ATL3	protein_coding	chrNC_010444.4:8361579-8408920:+
gene16244	6354	85.4504	17	0.225502	378.934	8.5658	0	0	up	yes	DGAT2	protein_coding	chrNC_010451.4:10032163-10066082:+
gene5435	370	4.97587	6037	80.0797	0.0621364	-4.00842	0	0	down	yes	ELN	protein_coding	chrNC_010445.4:11214194-11245891:+
gene27670	7850	105.569	1100	14.5913	7.23507	2.85501	0	0	up	yes	TSC22D3	protein_coding	chrNC_010461.5:88171325-88233583:-
gene20693	5376	72.298	16454	218.259	0.331248	-1.59402	0	0	down	yes	FLNB	protein_coding	chrNC_010455.5:39789259-39938751:+
gene23178	3888	52.2869	13782	182.816	0.286009	-1.80587	0	0	down	yes	RASSF4	protein_coding	chrNC_010456.5:91103518-91138501:-
gene12910	9040	121.572	22390	296.999	0.409336	-1.28864	0	0	down	yes	DEK	protein_coding	chrNC_010449.5:13901562-13935477:-
gene23134	3499	47.0556	12948	171.753	0.273973	-1.8679	0	0	down	yes	ANXA8	protein_coding	chrNC_010456.5:88319209-88340716:-
gene17892	12531	168.52	3421	45.3789	3.71363	1.89283	0	0	up	yes	ACO1	protein_coding	chrNC_010452.4:33937833-34001895:-
gene17557	5062	68.0752	15765	209.12	0.325532	-1.61913	0	0	down	yes	KCTD3	protein_coding	chrNC_010452.4:5754180-5815126:+
gene14514	21285	286.247	8706	115.483	2.47868	1.30957	0	0	up	yes	NEK9	protein_coding	chrNC_010449.5:98275973-98322072:-
gene1444	12424	167.081	3413	45.2728	3.69055	1.88384	0	0	up	yes	FRMD6	protein_coding	chrNC_010443.5:181338404-181416813:+
gene4194	3597	48.3735	13009	172.562	0.280325	-1.83483	0	0	down	yes	DAPK3	protein_coding	chrNC_010444.4:74758962-74776355:+
gene20816	15044	202.316	31136	413.013	0.489854	-1.02958	0	0	down	yes	ARPC4	protein_coding	chrNC_010455.5:66075926-66093986:+
gene16341	9078	122.084	1741	23.094	5.28637	2.40228	0	0	up	yes	TMEM135	protein_coding	chrNC_010451.4:20741085-21020899:+
gene7272	4154	55.8642	13990	185.575	0.301033	-1.732	0	0	down	yes	RIDA	protein_coding	chrNC_010446.5:38656270-38665863:+
gene290	1170	15.7345	7883	104.567	0.150474	-2.73242	0	0	down	yes	CTGF	protein_coding	chrNC_010443.5:31674398-31677697:+
gene9689	12821	172.42	3701	49.0931	3.51211	1.81234	0	0	up	yes	ADIPOR2	protein_coding	chrNC_010447.5:68755789-68807247:+
gene6373	11445	153.916	2970	39.3965	3.90684	1.966	0	0	up	yes	ANTXR1	protein_coding	chrNC_010445.4:73157744-73398379:-
gene25700	9664	129.964	2074	27.5112	4.72404	2.24002	0	0	up	yes	CPXM1	protein_coding	chrNC_010459.5:32845154-32852065:+
gene10167	4940	66.4345	83	1.10098	60.3413	5.91507	0	0	up	yes	ADAMTS18	protein_coding	chrNC_010448.4:10488504-10652508:+
gene21260	1916	25.7669	9459	125.472	0.20536	-2.28377	0	0	down	yes	GNB4	protein_coding	chrNC_010455.5:117442594-117513387:-
gene22914	10291	138.396	23817	315.928	0.438063	-1.19079	0	0	down	yes	ARID5B	protein_coding	chrNC_010456.5:65408603-65598485:+
gene577	1069	14.3762	7531	99.8973	0.14391	-2.79676	0	0	down	yes	MICAL1	protein_coding	chrNC_010443.5:75511692-75522760:-
gene5853	2671	35.9204	10973	145.555	0.246782	-2.01869	0	0	down	yes	TNFRSF12A	protein_coding	chrNC_010445.4:39166288-39168294:-
gene17022	7462	100.351	19333	256.449	0.391311	-1.35361	0	0	down	yes	ASNS	protein_coding	chrNC_010451.4:77318341-77336290:-
gene25840	10249	137.831	23621	313.328	0.439895	-1.18477	0	0	down	yes	EIF6	protein_coding	chrNC_010459.5:38638295-38643918:-
gene16439	348	4.68	5523	73.2616	0.0638808	-3.96847	0	0	down	yes	C9H11orf70	protein_coding	chrNC_010451.4:32753274-32795303:+
gene27261	1547	20.8045	8545	113.348	0.183546	-2.44579	0	0	down	yes	SLC38A5	protein_coding	chrNC_010461.5:42590608-42601537:-
gene7563	11975	161.043	3368	44.6759	3.6047	1.84988	0	0	up	yes	SNAI2	protein_coding	chrNC_010446.5:79264880-79268475:+
gene6355	21151	284.445	9046	119.993	2.3705	1.24519	0	0	up	yes	PCYOX1	protein_coding	chrNC_010445.4:72207406-72223605:-
gene25831	7107	95.577	1018	13.5036	7.0779	2.82332	0	0	up	yes	ACSS2	protein_coding	chrNC_010459.5:38260152-38315764:+
gene17395	10543	141.785	23902	317.056	0.447194	-1.16103	0	0	down	yes	ARPC5	protein_coding	chrNC_010451.4:124839062-124847906:-
gene10004	9276	124.746	21939	291.017	0.428657	-1.2221	0	0	down	yes	PPP1R12A	protein_coding	chrNC_010447.5:101490282-101639456:+
gene2417	5787	77.8252	512	6.79158	11.4591	3.51842	0	0	up	yes	FCN2	protein_coding	chrNC_010443.5:274106276-274111970:+
gene23738	11653	156.713	3256	43.1902	3.62843	1.85935	0	0	up	yes	TNFAIP6	protein_coding	chrNC_010457.5:862013-881352:-
gene24736	1460	19.6345	8242	109.329	0.179592	-2.47721	0	0	down	yes	ARL4C	protein_coding	chrNC_010457.5:134618490-134622211:-
gene9760	255	3.42931	5133	68.0883	0.0503657	-4.31142	0	0	down	yes	AMIGO2	protein_coding	chrNC_010447.5:77642144-77645748:-
gene24369	5608	75.418	457	6.06202	12.4411	3.63704	0	0	up	yes	CAVIN2	protein_coding	chrNC_010457.5:96476675-96490231:-
gene14641	23750	319.397	10870	144.188	2.21513	1.14739	0	0	up	yes	ISG12(A)	protein_coding	chrNC_010449.5:115356619-115361537:+
gene8415	8180	110.007	1553	20.6003	5.34008	2.41686	0	0	up	yes	VCAM1	protein_coding	chrNC_010446.5:117496914-117511211:-
gene6415	20205	271.723	8598	114.051	2.38247	1.25246	0	0	up	yes	MDH1	protein_coding	chrNC_010445.4:78247229-78263085:-
gene18542	2015	27.0983	9293	123.27	0.219829	-2.18555	0	0	down	yes	LMO7	protein_coding	chrNC_010453.5:47911076-48133449:+
gene4673	702	9.4407	6253	82.9449	0.113819	-3.13519	0	0	down	yes	CCDC112	protein_coding	chrNC_010444.4:119443404-119480805:-
gene18539	7217	97.0563	1158	15.3607	6.3185	2.65958	0	0	up	yes	TBC1D4	protein_coding	chrNC_010453.5:47543808-47760928:-
gene15609	15478	208.153	5635	74.7472	2.78475	1.47755	0	0	up	yes	HADH	protein_coding	chrNC_010450.4:113952561-114005510:-
gene26846	6769	91.0314	17662	234.283	0.388553	-1.36382	0	0	down	yes	STK17A	protein_coding	chrNC_010460.4:51325438-51362181:-
gene20660	23295	313.278	10768	142.835	2.19328	1.13309	0	0	up	yes	TKT	protein_coding	chrNC_010455.5:35348921-35377518:-
gene11872	17511	235.493	6923	91.8323	2.56438	1.35861	0	0	up	yes	IFI6	protein_coding	chrNC_010448.4:84852782-84858072:-
gene23349	2157	29.008	9494	125.936	0.230339	-2.11817	0	0	down	yes	AVPI1	protein_coding	chrNC_010456.5:109044500-109052228:-
gene8185	13670	183.838	28007	371.508	0.494843	-1.01496	0	0	down	yes	PHGDH	protein_coding	chrNC_010446.5:101445977-101478144:-
gene9277	8455	113.705	20207	268.042	0.424207	-1.23716	0	0	down	yes	RAP1B	protein_coding	chrNC_010447.5:32910181-32961972:+
gene18661	4481	60.2618	13704	181.781	0.331508	-1.59289	0	0	down	yes	ITGBL1	protein_coding	chrNC_010453.5:70042051-70246974:+
gene15450	3335	44.85	11639	154.389	0.2905	-1.78339	0	0	down	yes	SLC7A11	protein_coding	chrNC_010450.4:88608083-88690589:+
gene20580	7105	95.5501	18012	238.926	0.399915	-1.32223	0	0	down	yes	GNAI2	protein_coding	chrNC_010455.5:32705326-32733804:+
gene4208	3645	49.019	12156	161.247	0.303999	-1.71786	0	0	down	yes	HMG20B	protein_coding	chrNC_010444.4:75093071-75098566:-
gene683	2313	31.1059	9622	127.634	0.243712	-2.03675	0	0	down	yes	CD109	protein_coding	chrNC_010443.5:92081675-92241079:-
gene4699	26006	349.736	12887	170.944	2.04591	1.03275	0	0	up	yes	HSD17B4	protein_coding	chrNC_010444.4:123313445-123401386:+
gene10914	1894	25.4711	8752	116.094	0.219401	-2.18836	0	0	down	yes	VASP	protein_coding	chrNC_010448.4:51872810-51886729:+
gene18933	10618	142.794	2985	39.5955	3.60632	1.85053	0	0	up	yes	ACOX1	protein_coding	chrNC_010454.4:5450913-5479550:+
gene5350	1803	24.2473	8477	112.446	0.215635	-2.21334	0	0	down	yes	TRIP6	protein_coding	chrNC_010445.4:8713221-8716891:+
gene19067	7105	95.5501	1249	16.5677	5.76723	2.52788	0	0	up	yes	PITPNC1	protein_coding	chrNC_010454.4:13741195-14019694:+
gene8002	4936	66.3807	381	5.05389	13.1346	3.7153	0	0	up	yes	S100A12	protein_coding	chrNC_010446.5:96225691-96227030:+
gene9486	16247	218.494	6413	85.0672	2.56849	1.36092	0	0	up	yes	LRP6	protein_coding	chrNC_010447.5:60149041-60318719:+
gene27059	9352	125.768	2363	31.3447	4.01242	2.00447	0	0	up	yes	SAT1	protein_coding	chrNC_010461.5:19908037-19910553:+
gene643	6749	90.7625	1113	14.7637	6.14766	2.62004	0	0	up	yes	ME1	protein_coding	chrNC_010443.5:82799878-82989895:+
gene4423	3311	44.5273	11312	150.052	0.296747	-1.7527	0	0	down	yes	CLTB	protein_coding	chrNC_010444.4:81464887-81484712:+
gene9933	11903	160.075	24895	330.227	0.484741	-1.04471	0	0	down	yes	EEA1	protein_coding	chrNC_010447.5:90131707-90257014:+
gene2329	3006	40.4255	10732	142.358	0.283971	-1.81618	0	0	down	yes	PRRX2	protein_coding	chrNC_010443.5:269853134-269902808:+
gene20728	9098	122.352	2259	29.9652	4.08315	2.02968	0	0	up	yes	ADAMTS9	protein_coding	chrNC_010455.5:46033753-46209238:-
gene18486	5337	71.7735	552	7.32218	9.80221	3.29311	0	0	up	yes	RGCC	protein_coding	chrNC_010453.5:25481845-25496548:-
gene7643	13175	177.181	4566	60.5671	2.92537	1.54862	0	0	up	yes	MGST3	protein_coding	chrNC_010446.5:85069603-85095022:-
gene5484	2150	28.9138	9031	119.795	0.241362	-2.05073	0	0	down	yes	PSPH	protein_coding	chrNC_010445.4:16877904-16903062:+
gene22398	6577	88.4494	1071	14.2066	6.22593	2.63829	0	0	up	yes	TMEM120B	protein_coding	chrNC_010456.5:30901813-30957350:-
gene3291	2699	36.2969	10082	133.736	0.271408	-1.88147	0	0	down	yes	RRAS2	protein_coding	chrNC_010444.4:44890129-44961003:+
gene9193	20319	273.256	9210	122.169	2.2367	1.16137	0	0	up	yes	OS9	protein_coding	chrNC_010447.5:22957903-23004464:+
gene16546	4120	55.4069	121	1.60504	34.5205	5.10938	0	0	up	yes	ZBTB16	protein_coding	chrNC_010451.4:41639536-41839254:+
gene22552	9142	122.944	20627	273.613	0.449336	-1.15413	0	0	down	yes	TMEM119	protein_coding	chrNC_010456.5:42190958-42197384:+
gene10513	20051	269.652	9102	120.736	2.23339	1.15924	0	0	up	yes	LONP2	protein_coding	chrNC_010448.4:36372596-36466185:-
gene9253	12447	167.391	25416	337.138	0.496505	-1.01012	0	0	down	yes	MSRB3	protein_coding	chrNC_010447.5:29695824-29863601:+
gene17756	1109	14.9141	6711	89.0201	0.167537	-2.57745	0	0	down	yes	LMOD1	protein_coding	chrNC_010452.4:24165293-24194823:-
gene11599	22731	305.693	10972	145.542	2.10038	1.07065	0	0	up	yes	PGD	protein_coding	chrNC_010448.4:70675751-70692697:+
gene12412	23906	321.495	11809	156.644	2.05239	1.0373	0	0	up	yes	JAK1	protein_coding	chrNC_010448.4:147320288-147567188:+
gene24898	10627	142.915	22580	299.519	0.477147	-1.06749	0	0	down	yes	TARS	protein_coding	chrNC_010458.4:19455294-19486735:+
gene3148	6228	83.7559	15867	210.473	0.397942	-1.32937	0	0	down	yes	CD44	protein_coding	chrNC_010444.4:25788699-25884209:-
gene15530	4358	58.6076	12760	169.259	0.34626	-1.53007	0	0	down	yes	PDE5A	protein_coding	chrNC_010450.4:104270858-104420955:+
gene23045	5784	77.7849	15116	200.511	0.387933	-1.36612	0	0	down	yes	PLAU	protein_coding	chrNC_010456.5:76629313-76635173:+
gene2650	6611	88.9066	16404	217.596	0.408586	-1.29129	0	0	down	yes	DRAP1	protein_coding	chrNC_010444.4:6409623-6411935:-
gene3308	4698	63.18	13300	176.422	0.358119	-1.48149	0	0	down	yes	DKK3	protein_coding	chrNC_010444.4:47385244-47444664:+
gene1321	8027	107.949	1887	25.0307	4.31268	2.10858	0	0	up	yes	SMAD3	protein_coding	chrNC_010443.5:164998457-165124455:+
gene7995	339	4.55897	4560	60.4875	0.0753704	-3.72986	0	0	down	yes	S100A4	protein_coding	chrNC_010446.5:96088102-96091160:+
gene18172	2390	32.1414	9177	121.731	0.264036	-1.92119	0	0	down	yes	KLF6	protein_coding	chrNC_010452.4:66488445-66497830:+
gene16959	4036	54.2773	12141	161.048	0.337025	-1.56907	0	0	down	yes	CDK14	protein_coding	chrNC_010451.4:70678012-71310253:+
gene8849	8748	117.646	19617	260.216	0.452108	-1.14526	0	0	down	yes	NUAK1	protein_coding	chrNC_010447.5:14089584-14177584:+
gene10263	9881	132.883	2902	38.4945	3.45199	1.78743	0	0	up	yes	NQO1	protein_coding	chrNC_010448.4:17292962-17302593:+
gene4765	7056	94.8911	1442	19.1279	4.96088	2.3106	0	0	up	yes	ISOC1	protein_coding	chrNC_010444.4:131857126-131877873:+
gene4393	7143	96.0611	17115	227.027	0.423126	-1.24084	0	0	down	yes	PDLIM7	protein_coding	chrNC_010444.4:80453013-80472660:+
gene30259	4542	61.0821	11	0.145913	418.62	8.7095	0	0	up	yes	LOC110259135	protein_coding	chrNW_018085343.1:26620-60650:+
gene21606	10744	144.488	22460	297.928	0.484978	-1.04401	0	0	down	yes	NECTIN3	protein_coding	chrNC_010455.5:148448581-148578920:-
gene11298	98	1.31793	3812	50.5655	0.0260639	-5.2618	0	0	down	yes	IL11	protein_coding	chrNC_010448.4:59540482-59544909:-
gene24632	651	8.75483	5330	70.7014	0.123828	-3.01359	0	0	down	yes	SERPINE2	protein_coding	chrNC_010457.5:125748383-125777788:-
gene5735	5268	70.8456	14086	186.848	0.379161	-1.39912	0	0	down	yes	LITAF	protein_coding	chrNC_010445.4:31482605-31576211:+
gene8760	5088	68.4249	13789	182.908	0.374094	-1.41853	0	0	down	yes	KDELR3	protein_coding	chrNC_010447.5:9505205-9515723:-
gene22645	2471	33.2307	9207	122.129	0.272095	-1.87782	0	0	down	yes	SELENOM	protein_coding	chrNC_010456.5:47902862-47905350:-
gene27668	4832	64.9821	13349	177.072	0.366981	-1.44622	0	0	down	yes	PRPS1	protein_coding	chrNC_010461.5:88074861-88101925:+
gene19183	7345	98.7777	1640	21.7543	4.54061	2.18288	0	0	up	yes	GRN	protein_coding	chrNC_010454.4:18893772-18900444:-
gene23676	7999	107.573	18131	240.504	0.44728	-1.16075	0	0	down	yes	GLRX3	protein_coding	chrNC_010456.5:139072554-139108063:+
gene10804	3699	49.7452	30	0.397944	125.005	6.96585	0	0	up	yes	CEACAM1	protein_coding	chrNC_010448.4:49437308-49460614:+
gene2517	4596	61.8083	12727	168.821	0.366117	-1.44962	0	0	down	yes	CARS	protein_coding	chrNC_010444.4:2119576-2163378:-
gene10005	1247	16.77	6537	86.7121	0.193399	-2.37035	0	0	down	yes	PAWR	protein_coding	chrNC_010447.5:101693145-101797842:+
gene6623	17496	235.291	7895	104.726	2.24674	1.16783	0	0	up	yes	EIF2AK2	protein_coding	chrNC_010445.4:103041029-103096741:+
gene17641	6092	81.927	1114	14.777	5.54422	2.47098	0	0	up	yes	EPHX1	protein_coding	chrNC_010452.4:13757489-13773071:+
gene12090	4015	53.9949	279	3.70088	14.5897	3.86688	0	0	up	yes	CIDEA	protein_coding	chrNC_010448.4:97253074-97268355:-
gene24334	767	10.3148	5356	71.0463	0.145185	-2.78404	0	0	down	yes	GULP1	protein_coding	chrNC_010457.5:92988094-93252188:+
gene20289	1664	22.3779	7324	97.1515	0.230341	-2.11816	0	0	down	yes	NGLY1	protein_coding	chrNC_010455.5:12616564-12683637:-
gene7297	13214	177.706	5158	68.4199	2.59728	1.377	0	0	up	yes	TP53INP1	protein_coding	chrNC_010446.5:41747654-41766688:+
gene5417	8697	116.96	2466	32.711	3.57554	1.83816	0	0	up	yes	TBL2	protein_coding	chrNC_010445.4:10850347-10892441:-
gene8001	3502	47.0959	108	1.4326	32.8744	5.03889	0	0	up	yes	S100A8	protein_coding	chrNC_010446.5:96209670-96210603:+
gene22502	12703	170.834	4845	64.268	2.65814	1.41042	0	0	up	yes	GCN1	protein_coding	chrNC_010456.5:40151415-40218183:-
gene27110	5108	68.6938	718	9.52413	7.21261	2.85052	0	0	up	yes	GK	protein_coding	chrNC_010461.5:26470422-26558892:+
gene5469	8675	116.664	2485	32.9631	3.53923	1.82344	0	0	up	yes	TPST1	protein_coding	chrNC_010445.4:16407607-16525788:-
gene23441	17018	228.863	7742	102.696	2.22854	1.1561	0	0	up	yes	WBP1L	protein_coding	chrNC_010456.5:113737758-113800564:+
gene24963	3475	46.7328	125	1.6581	28.1845	4.81683	0	0	up	yes	C7	protein_coding	chrNC_010458.4:25846860-25902707:+
gene18913	5953	80.0576	1121	14.8699	5.38389	2.42865	0	0	up	yes	CYGB	protein_coding	chrNC_010454.4:4977245-4988283:+
gene23220	10086	135.639	20721	274.86	0.493485	-1.01892	0	0	down	yes	PAPSS2	protein_coding	chrNC_010456.5:99718299-99816346:+
gene21743	11976	161.057	4517	59.9172	2.68799	1.42653	0	0	up	yes	CRYBG3	protein_coding	chrNC_010455.5:162354343-162478771:-
gene17751	3069	41.2728	9776	129.677	0.318274	-1.65166	0	0	down	yes	CSRP1	protein_coding	chrNC_010452.4:23843130-23864020:-
gene11503	7378	99.2214	16669	221.111	0.44874	-1.15605	0	0	down	yes	GNB1	protein_coding	chrNC_010448.4:63867155-63957514:-
gene20954	3218	43.2766	9997	132.608	0.326349	-1.61551	0	0	down	yes	AMOTL2	protein_coding	chrNC_010455.5:75490936-75507360:-
gene18799	3912	52.6097	11170	148.168	0.355068	-1.49383	0	0	down	yes	PYCR1	protein_coding	chrNC_010454.4:1060028-1064808:+
gene26662	3269	43.9624	89	1.18057	37.2384	5.21872	0	0	up	yes	EEPD1	protein_coding	chrNC_010460.4:37824450-37948855:-
gene17237	132	1.77517	3387	44.9279	0.0395116	-4.66158	0	0	down	yes	SFRP4	protein_coding	chrNC_010451.4:108404314-108414335:-
gene26868	3778	50.8076	10861	144.069	0.352661	-1.50364	0	0	down	yes	RALA	protein_coding	chrNC_010460.4:54548523-54630746:-
gene25203	8503	114.351	2537	33.6528	3.39795	1.76467	0	0	up	yes	SH3PXD2B	protein_coding	chrNC_010458.4:51733170-51858774:+
gene6225	11050	148.604	4045	53.6562	2.76955	1.46965	0	0	up	yes	RMND5A	protein_coding	chrNC_010445.4:58038024-58096852:-
gene9448	1286	17.2945	6214	82.4275	0.209815	-2.25281	0	0	down	yes	EPS8	protein_coding	chrNC_010447.5:56817445-57005117:+
gene94	3311	44.5273	9993	132.555	0.335915	-1.57383	0	0	down	yes	EZR	protein_coding	chrNC_010443.5:8403362-8452750:+
gene24016	7780	104.628	17021	225.78	0.463405	-1.10966	0	0	down	yes	EIF4EBP1	protein_coding	chrNC_010457.5:48423001-48443373:-
gene15558	2739	36.8349	8966	118.932	0.309713	-1.691	0	0	down	yes	CAMK2D	protein_coding	chrNC_010450.4:108916019-109221317:+
gene12545	5273	70.9128	13178	174.804	0.405671	-1.30162	0	0	down	yes	OSBPL9	protein_coding	chrNC_010448.4:160388713-160566381:-
gene1286	1187	15.9631	5948	78.8991	0.202323	-2.30527	0	0	down	yes	RASL12	protein_coding	chrNC_010443.5:163089440-163104027:-
gene24752	11198	150.594	4207	55.8051	2.69857	1.4322	0	0	up	yes	COPS8	protein_coding	chrNC_010457.5:136828222-136838058:+
gene25245	12174	163.719	4824	63.9894	2.55854	1.35532	0	0	up	yes	PANK3	protein_coding	chrNC_010458.4:55313333-55340070:+
gene19352	6593	88.6645	1567	20.786	4.2656	2.09275	0	0	up	yes	ORMDL3	protein_coding	chrNC_010454.4:22411130-22417744:+
gene10326	390	5.24483	4032	53.4837	0.0980641	-3.35013	0	0	down	yes	KIFC3	protein_coding	chrNC_010448.4:19659987-19696104:-
gene5891	5949	80.0038	1262	16.7402	4.77915	2.25675	0	0	up	yes	ECI1	protein_coding	chrNC_010445.4:39750742-39758516:+
gene23972	3660	49.2207	10484	139.068	0.353932	-1.49846	0	0	down	yes	CASP3	protein_coding	chrNC_010457.5:45744320-45753252:-
gene25091	3714	49.9469	316	4.19168	11.9157	3.5748	0	0	up	yes	ELOVL7	protein_coding	chrNC_010458.4:39588122-39680273:-
gene2450	9217	123.953	18977	251.726	0.492411	-1.02206	0	0	down	yes	RNH1	protein_coding	chrNC_010444.4:281919-290522:-
gene14375	14107	189.715	6155	81.6449	2.32366	1.2164	0	0	up	yes	AKAP13	protein_coding	chrNC_010449.5:87889384-88222854:+
gene1028	1909	25.6728	7297	96.7933	0.265233	-1.91467	0	0	down	yes	EHD4	protein_coding	chrNC_010443.5:129374515-129460206:+
gene22334	5787	77.8252	1226	16.2627	4.78552	2.25867	0	0	up	yes	AACS	protein_coding	chrNC_010456.5:28109845-28169261:-
gene1770	4085	54.9362	480	6.36711	8.62813	3.10905	0	0	up	yes	KLF9	protein_coding	chrNC_010443.5:223723613-223747661:-
gene17659	3490	46.9345	260	3.44885	13.6087	3.76646	0	0	up	yes	COQ8A	protein_coding	chrNC_010452.4:14597237-14643394:+
gene26074	7082	95.2408	1918	25.4419	3.74346	1.90437	0	0	up	yes	PTPN1	protein_coding	chrNC_010459.5:52017100-52086747:+
gene951	6187	83.2045	14318	189.926	0.43809	-1.1907	0	0	down	yes	SQOR	protein_coding	chrNC_010443.5:126078335-126137407:-
gene17405	4128	55.5145	11051	146.589	0.378708	-1.40084	0	0	down	yes	FAM129A	protein_coding	chrNC_010451.4:126007493-126172579:-
gene6122	556	7.47725	4292	56.9326	0.131335	-2.92868	0	0	down	yes	FHL2	protein_coding	chrNC_010445.4:49389900-49448459:+
gene3323	8476	113.988	17672	234.416	0.486263	-1.04019	0	0	down	yes	ADM	protein_coding	chrNC_010444.4:49229223-49231521:-
gene19734	3493	46.9749	283	3.75394	12.5135	3.64541	0	0	up	yes	UNC119	protein_coding	chrNC_010454.4:44801265-44807334:-
gene22414	6872	92.4166	15301	202.965	0.455333	-1.13501	0	0	down	yes	ARPC3	protein_coding	chrNC_010456.5:31814382-31823452:-
gene16962	13847	186.218	6131	81.3266	2.28976	1.1952	0	0	up	yes	FZD1	protein_coding	chrNC_010451.4:71346994-71356488:+
gene11922	395	5.31207	3842	50.9634	0.104233	-3.26211	0	0	down	yes	TINAGL1	protein_coding	chrNC_010448.4:88095650-88106092:+
gene8401	275	3.69828	3506	46.5064	0.0795219	-3.6525	0	0	down	yes	COL11A1	protein_coding	chrNC_010446.5:115638381-115841679:+
gene1419	9116	122.595	18533	245.837	0.498683	-1.00381	0	0	down	yes	ARF6	protein_coding	chrNC_010443.5:179697582-179717299:+
gene1236	745	10.019	4707	62.4375	0.160464	-2.63968	0	0	down	yes	LOC100156248	protein_coding	chrNC_010443.5:157820641-157836922:-
gene22685	11473	154.292	4603	61.0579	2.52698	1.33741	0	0	up	yes	SPECC1L	protein_coding	chrNC_010456.5:49332937-49463965:+
gene8462	2866	38.5428	8844	117.314	0.328544	-1.60584	0	0	down	yes	ARHGAP29	protein_coding	chrNC_010446.5:123082137-123158275:+
gene26248	7807	104.991	16570	219.798	0.47767	-1.06592	0	0	down	yes	ESYT2	protein_coding	chrNC_010460.4:565137-643308:+
gene26760	8425	113.302	17454	231.524	0.489374	-1.03099	0	0	down	yes	CBX3	protein_coding	chrNC_010460.4:46193138-46205114:-
gene1993	14358	193.09	6546	86.8315	2.22374	1.15299	0	0	up	yes	SLC44A1	protein_coding	chrNC_010443.5:246548461-246760527:+
gene8549	2420	32.5449	8023	106.424	0.305805	-1.70932	0	0	down	yes	ZNHIT6	protein_coding	chrNC_010446.5:130298109-130409569:+
gene14349	10958	147.366	4300	57.0387	2.58362	1.36939	0	0	up	yes	ARRDC4	protein_coding	chrNC_010449.5:81656760-81669584:-
gene15709	5208	70.0387	1034	13.7158	5.10642	2.35231	0	0	up	yes	FAM13A	protein_coding	chrNC_010450.4:130021581-130327731:+
gene26624	987	13.2735	5201	68.9903	0.192396	-2.37785	0	0	down	yes	TES	protein_coding	chrNC_010460.4:29895878-29936248:-
gene15045	690	9.27932	4502	59.7182	0.155385	-2.68608	0	0	down	yes	RASL11B	protein_coding	chrNC_010450.4:39703399-39708174:+
gene10848	1669	22.4452	6578	87.2559	0.257234	-1.95885	0	0	down	yes	PLAUR	protein_coding	chrNC_010448.4:50489773-50505453:-
gene12843	1763	23.7093	6751	89.5507	0.264759	-1.91725	0	0	down	yes	NEDD9	protein_coding	chrNC_010449.5:7807042-8093553:-
gene25141	1767	23.7631	6758	89.6436	0.265084	-1.91548	0	0	down	yes	CCNB1	protein_coding	chrNC_010458.4:47338239-47348385:+
gene24071	8079	108.649	16861	223.658	0.485781	-1.04162	0	0	down	yes	FAM168B	protein_coding	chrNC_010457.5:57375164-57419257:-
gene17134	6334	85.1814	14262	189.183	0.45026	-1.15117	0	0	down	yes	CROT	protein_coding	chrNC_010451.4:93263606-93308150:-
gene5084	12954	174.209	5672	75.238	2.31544	1.21129	0	0	up	yes	PDGFRB	protein_coding	chrNC_010444.4:151155753-151192818:-
gene6214	4532	60.9476	753	9.9884	6.10184	2.60924	0	0	up	yes	RPIA	protein_coding	chrNC_010445.4:57355973-57386948:-
gene1740	2985	40.1431	8924	118.375	0.339118	-1.56014	0	0	down	yes	VLDLR	protein_coding	chrNC_010443.5:219178501-219210332:-
gene15476	1622	21.8131	6446	85.505	0.255109	-1.97081	0	0	down	yes	JADE1	protein_coding	chrNC_010450.4:96208217-96564132:-
gene1446	2659	35.759	8343	110.668	0.323119	-1.62986	0	0	down	yes	GNG2	protein_coding	chrNC_010443.5:181485257-181651972:+
gene16518	143	1.9231	2996	39.7414	0.0483905	-4.36913	0	0	down	yes	CRYAB	protein_coding	chrNC_010451.4:39638505-39643530:-
gene10990	360	4.84138	3614	47.939	0.10099	-3.30771	0	0	down	yes	EMP3	protein_coding	chrNC_010448.4:53757513-53761833:+
gene562	4532	60.9476	763	10.1211	6.02187	2.59021	0	0	up	yes	FOXO3	protein_coding	chrNC_010443.5:74626673-74760323:+
gene26344	7064	94.9987	2049	27.1796	3.49522	1.80538	0	0	up	yes	GSTK1	protein_coding	chrNC_010460.4:6992623-6999068:-
gene17509	5110	68.7207	12307	163.25	0.420954	-1.24827	0	0	down	yes	CD46	protein_coding	chrNC_010451.4:135025439-135078910:-
gene19500	3397	45.6838	9548	126.652	0.360702	-1.47112	0	0	down	yes	NME1	protein_coding	chrNC_010454.4:27416308-27435044:+
gene4394	2744	36.9021	8433	111.862	0.329889	-1.59995	0	0	down	yes	DBN1	protein_coding	chrNC_010444.4:80480603-80495797:+
gene2050	2642	35.5304	8212	108.931	0.326174	-1.61629	0	0	down	yes	UGCG	protein_coding	chrNC_010443.5:252651850-252690817:+
gene6675	2071	27.8514	7175	95.175	0.292633	-1.77283	0	0	down	yes	CLIP4	protein_coding	chrNC_010445.4:110111015-110181144:-
gene19809	3052	41.0442	8881	117.805	0.348408	-1.52115	0	0	down	yes	MYO1C	protein_coding	chrNC_010454.4:47691252-47715670:-
gene2085	3711	49.9066	459	6.08855	8.1968	3.03506	0	0	up	yes	COL27A1	protein_coding	chrNC_010443.5:254768576-254924893:+
gene17118	5599	75.2969	1331	17.6555	4.2648	2.09248	0	0	up	yes	GPNMB	protein_coding	chrNC_010451.4:92037428-92071501:+
gene19531	16136	217.002	8047	106.742	2.03295	1.02358	0	0	up	yes	SCPEP1	protein_coding	chrNC_010454.4:33265509-33296805:+
gene23077	8201	110.289	2782	36.9027	2.98865	1.5795	0	0	up	yes	ZCCHC24	protein_coding	chrNC_010456.5:81699420-81763994:-
gene14072	2088	28.08	7148	94.8169	0.29615	-1.7556	0	0	down	yes	PCK2	protein_coding	chrNC_010449.5:75187195-75197613:-
gene20931	6454	86.7952	1787	23.7042	3.66159	1.87247	0	0	up	yes	ACAD11	protein_coding	chrNC_010455.5:73733508-73831496:-
gene893	6964	93.6539	14927	198.004	0.47299	-1.08012	0	0	down	yes	MYO5A	protein_coding	chrNC_010443.5:119165751-119398591:+
gene15615	316	4.24966	3362	44.5963	0.0952917	-3.39151	0	0	down	yes	DKK2	protein_coding	chrNC_010450.4:114862056-114974327:+
gene15910	6039	81.2142	13532	179.499	0.452448	-1.14418	0	0	down	yes	ILK	protein_coding	chrNC_010451.4:3145647-3152097:-
gene2617	8093	108.837	2733	36.2527	3.00217	1.58601	0	0	up	yes	CTSF	protein_coding	chrNC_010444.4:5855083-5860258:+
gene16512	4667	62.7631	892	11.8322	5.30443	2.4072	0	0	up	yes	SIK2	protein_coding	chrNC_010451.4:39368555-39483519:+
gene1541	8084	108.716	16517	219.095	0.496205	-1.01099	0	0	down	yes	HIF1A	protein_coding	chrNC_010443.5:190625436-190673926:+
gene21221	7008	94.2456	2108	27.9622	3.37046	1.75295	0	0	up	yes	RPL22L1	protein_coding	chrNC_010455.5:109495771-109499495:-
gene1808	5337	71.7735	12460	165.28	0.434255	-1.20339	0	0	down	yes	PRUNE2	protein_coding	chrNC_010443.5:229578444-229849222:-
gene14480	6709	90.2245	1946	25.8133	3.49527	1.8054	0	0	up	yes	LOC110255331	protein_coding	chrNC_010449.5:96868109-96873604:+
gene3613	1295	17.4155	5584	74.0707	0.23512	-2.08853	0	0	down	yes	JUND	protein_coding	chrNC_010444.4:59530991-59532846:+
gene24474	2064	27.7573	7048	93.4904	0.2969	-1.75195	0	0	down	yes	KLF7	protein_coding	chrNC_010457.5:110282399-110380165:-
gene20427	5745	77.2604	1439	19.0881	4.04758	2.01706	0	0	up	yes	SNRK	protein_coding	chrNC_010455.5:26669208-26724466:+
gene4321	1017	13.6769	4976	66.0057	0.207208	-2.27085	0	0	down	yes	FSTL3	protein_coding	chrNC_010444.4:77656655-77662608:-
gene16865	2082	27.9993	7046	93.4639	0.299574	-1.73902	0	0	down	yes	ATP2B4	protein_coding	chrNC_010451.4:64336354-64445669:+
gene9369	1786	24.0186	6483	85.9958	0.2793	-1.84011	0	0	down	yes	KLHL42	protein_coding	chrNC_010447.5:45929854-45954887:-
gene1710	696	9.36001	4233	56.1499	0.166697	-2.5847	0	0	down	yes	IL33	protein_coding	chrNC_010443.5:215899830-215941944:-
gene9188	1142	15.3579	5195	68.9107	0.222867	-2.16574	0	0	down	yes	ARHGEF25	protein_coding	chrNC_010447.5:22873502-22880830:+
gene2541	887	11.9286	4645	61.615	0.193599	-2.36885	0	0	down	yes	CCND1	protein_coding	chrNC_010444.4:3621242-3633380:-
gene471	10779	144.959	4507	59.7845	2.42469	1.2778	0	0	up	yes	MDN1	protein_coding	chrNC_010443.5:57660222-57826362:-
gene18742	6351	85.4101	1814	24.0624	3.54953	1.82763	0	0	up	yes	GAS6	protein_coding	chrNC_010453.5:78848797-78880733:-
gene17179	4856	65.3049	1040	13.7954	4.73381	2.243	0	0	up	yes	FGL2	protein_coding	chrNC_010451.4:102869044-102875564:+
gene9563	2627	35.3286	7919	105.044	0.336322	-1.57208	0	0	down	yes	SLC2A3	protein_coding	chrNC_010447.5:62963635-63041955:-
gene19279	4385	58.9707	823	10.9169	5.40176	2.43343	0	0	up	yes	LOC110255272	protein_coding	chrNC_010454.4:21037349-21041743:+
gene16408	6060	81.4966	1673	22.192	3.67234	1.8767	0	0	up	yes	SESN3	protein_coding	chrNC_010451.4:27207239-27279205:-
gene9996	2778	37.3593	176	2.33461	16.0024	4.00022	0	0	up	yes	ACSS3	protein_coding	chrNC_010447.5:100272255-100429229:-
gene5495	283	3.80586	3128	41.4923	0.0917245	-3.44655	0	0	down	yes	TGFB1I1	protein_coding	chrNC_010445.4:17093275-17099204:-
gene4062	7719	103.807	2627	34.8467	2.97897	1.57482	0	0	up	yes	ANGPTL4	protein_coding	chrNC_010444.4:70905767-70912892:-
gene24356	1527	20.5355	5895	78.1961	0.262616	-1.92897	0	0	down	yes	INPP1	protein_coding	chrNC_010457.5:94956535-94987286:+
gene12886	3762	50.5924	561	7.44156	6.79864	2.76525	0	0	up	yes	MYLIP	protein_coding	chrNC_010449.5:12117240-12137934:+
gene21776	11988	161.218	5384	71.4177	2.25739	1.17466	0	0	up	yes	GBE1	protein_coding	chrNC_010455.5:173634401-173909646:+
gene18001	7192	96.7201	2341	31.0529	3.11468	1.63909	0	0	up	yes	PHYH	protein_coding	chrNC_010452.4:48404298-48423978:+
gene16635	3614	48.6021	9473	125.658	0.386782	-1.37041	0	0	down	yes	C1QTNF5	protein_coding	chrNC_010451.4:46548175-46550146:-
gene25013	1204	16.1917	5205	69.0433	0.234516	-2.09224	0	0	down	yes	PARP8	protein_coding	chrNC_010458.4:30304800-30486416:+
gene20791	5163	69.4335	1241	16.4616	4.2179	2.07652	0	0	up	yes	ITPR1	protein_coding	chrNC_010455.5:61068131-61398918:+
gene13835	10479	140.925	4421	58.6437	2.40306	1.26487	0	0	up	yes	ANPEP	protein_coding	chrNC_010449.5:55351081-55373856:-
gene8244	4289	57.6797	10509	139.4	0.413771	-1.27309	0	0	down	yes	NRAS	protein_coding	chrNC_010446.5:105845913-105853769:+
gene6310	2777	37.3459	8023	106.424	0.350917	-1.5108	0	0	down	yes	MTHFD2	protein_coding	chrNC_010445.4:68819171-68833641:-
gene1489	896	12.0497	4496	59.6386	0.202045	-2.30725	0	0	down	yes	PELI2	protein_coding	chrNC_010443.5:185397807-185604160:+
gene26075	4807	64.6459	1092	14.4852	4.4629	2.15798	0	0	up	yes	RIPOR3	protein_coding	chrNC_010459.5:52088049-52163964:-
gene24330	2715	36.5121	191	2.53358	14.4113	3.84913	0	0	up	yes	CALCRL	protein_coding	chrNC_010457.5:92233264-92332459:-
gene9944	11554	155.381	5195	68.9107	2.25482	1.17301	0	0	up	yes	BTG1	protein_coding	chrNC_010447.5:90815194-90817936:+
gene10200	13480	181.283	6532	86.6457	2.09223	1.06504	0	0	up	yes	GLG1	protein_coding	chrNC_010448.4:13011829-13165487:+
gene18852	6691	89.9825	2116	28.0683	3.20584	1.6807	0	0	up	yes	TBC1D16	protein_coding	chrNC_010454.4:2384161-2460861:+
gene22895	877	11.7941	4441	58.909	0.200209	-2.32042	0	0	down	yes	FAM13C	protein_coding	chrNC_010456.5:62622895-62754404:-
gene3305	989	13.3004	4664	61.8671	0.214983	-2.21771	0	0	down	yes	MICAL2	protein_coding	chrNC_010444.4:47042475-47302087:-
gene17005	11518	154.897	5228	69.3484	2.23361	1.15938	0	0	up	yes	PON2	protein_coding	chrNC_010451.4:75027270-75051441:-
gene22447	2739	36.8349	7848	104.102	0.353833	-1.49886	0	0	down	yes	WSB2	protein_coding	chrNC_010456.5:34608965-34630980:+
gene17424	3582	48.1718	9227	122.394	0.393578	-1.34528	0	0	down	yes	CENPF	protein_coding	chrNC_010451.4:128948386-129012241:-
gene9347	5278	70.98	1370	18.1728	3.90584	1.96563	0	0	up	yes	KIAA1551	protein_coding	chrNC_010447.5:42263560-42299596:-
gene18025	1903	25.5921	6372	84.5234	0.302781	-1.72365	0	0	down	yes	PRTFDC1	protein_coding	chrNC_010452.4:50365654-50458487:+
gene9818	3623	48.7231	9265	122.898	0.39645	-1.33479	0	0	down	yes	SLC41A2	protein_coding	chrNC_010447.5:79593913-79721599:+
gene9145	12943	174.061	6261	83.051	2.09584	1.06753	0	0	up	yes	STAT2	protein_coding	chrNC_010447.5:21733030-21748960:-
gene24407	4266	57.3704	878	11.6465	4.92597	2.30041	0	0	up	yes	AOX1	protein_coding	chrNC_010457.5:104157748-104234533:+
gene24478	6343	85.3025	13354	177.138	0.481559	-1.05422	0	0	down	yes	CCNYL1	protein_coding	chrNC_010457.5:110873912-110910929:+
gene19077	3290	44.2449	8681	115.152	0.384231	-1.37996	0	0	down	yes	SMURF2	protein_coding	chrNC_010454.4:14368683-14492129:+
gene14615	3076	41.3669	8321	110.376	0.37478	-1.41588	0	0	down	yes	ATXN3	protein_coding	chrNC_010449.5:113611566-113645835:-
gene22550	6893	92.699	14087	186.861	0.496084	-1.01134	0	0	down	yes	CORO1C	protein_coding	chrNC_010456.5:42062468-42145130:+
gene22856	3250	43.7069	442	5.86305	7.45464	2.89814	0	0	up	yes	AGT	protein_coding	chrNC_010456.5:59643030-59656835:+
gene163	3085	41.488	376	4.98757	8.31827	3.05628	0	0	up	yes	LRP11	protein_coding	chrNC_010443.5:16139227-16198974:+
gene7046	5072	68.2097	1307	17.3371	3.93432	1.97611	0	0	up	yes	ST3GAL1	protein_coding	chrNC_010446.5:7814492-7911053:+
gene3328	3969	53.3762	9716	128.881	0.414152	-1.27177	0	0	down	yes	SWAP70	protein_coding	chrNC_010444.4:49721120-49805262:-
gene10761	7963	107.089	2986	39.6087	2.70366	1.43492	0	0	up	yes	PLD3	protein_coding	chrNC_010448.4:48645347-48667394:+
gene27733	6809	91.5694	2288	30.3499	3.01712	1.59317	0	0	up	yes	IL13RA1	protein_coding	chrNC_010461.5:97300960-97353754:+
gene21541	9323	125.378	3860	51.2022	2.44869	1.29201	0	0	up	yes	ARHGAP31	protein_coding	chrNC_010455.5:140837078-140948504:-
gene22499	7667	103.108	2816	37.3537	2.76032	1.46483	0	0	up	yes	ALDH2	protein_coding	chrNC_010456.5:39902317-39933113:-
gene993	1307	17.5769	5147	68.274	0.257447	-1.95765	0	0	down	yes	MAP1A	protein_coding	chrNC_010443.5:127916639-127936952:-
gene15725	384	5.16414	3130	41.5189	0.124381	-3.00717	0	0	down	yes	SPP1	protein_coding	chrNC_010450.4:131077786-131085334:-
gene13591	1673	22.499	5819	77.1879	0.291483	-1.77852	0	0	down	yes	GTPBP2	protein_coding	chrNC_010449.5:38598763-38613217:-
gene4099	3982	53.5511	786	10.4261	5.13623	2.36071	0	0	up	yes	INSR	protein_coding	chrNC_010444.4:71797209-71939923:+
gene19669	368	4.94897	3070	40.723	0.121528	-3.04064	0	0	down	yes	CCL2	protein_coding	chrNC_010454.4:40798109-40800013:-
gene21672	747	10.0459	3954	52.4491	0.191536	-2.38431	0	0	down	yes	COL8A1	protein_coding	chrNC_010455.5:159216138-159374718:-
gene25524	8880	119.421	3632	48.1778	2.47875	1.30961	0	0	up	yes	PSD3	protein_coding	chrNC_010459.5:12645743-13267176:+
gene14068	6374	85.7194	2084	27.6439	3.10085	1.63266	0	0	up	yes	PSME1	protein_coding	chrNC_010449.5:75161830-75164531:-
gene25496	6820	91.7173	2353	31.2121	2.93852	1.55509	0	0	up	yes	GPAT4	protein_coding	chrNC_010459.5:10705998-10724486:+
gene18151	2687	36.1355	7530	99.884	0.361775	-1.46684	0	0	down	yes	NET1	protein_coding	chrNC_010452.4:65428013-65438346:-
gene12223	748	10.0593	3927	52.0909	0.193111	-2.3725	0	0	down	yes	DSC2	protein_coding	chrNC_010448.4:114982259-115021332:-
gene17440	3333	44.8231	8566	113.626	0.394478	-1.34198	0	0	down	yes	RPS6KC1	protein_coding	chrNC_010451.4:130222631-130453584:-
gene462	4412	59.3338	1024	13.5832	4.36819	2.12704	0	0	up	yes	PM20D2	protein_coding	chrNC_010443.5:57188019-57219243:+
gene25006	2202	29.6131	87	1.15404	25.6604	4.68147	0	0	up	yes	FGF10	protein_coding	chrNC_010458.4:28695465-28779953:-
gene9887	2548	34.2662	7240	96.0372	0.356802	-1.48681	0	0	down	yes	NEDD1	protein_coding	chrNC_010447.5:86693802-86737259:-
gene20884	3978	53.4973	9527	126.374	0.423326	-1.24016	0	0	down	yes	TMEM43	protein_coding	chrNC_010455.5:70397069-70417213:-
gene9580	8656	116.408	3552	47.1166	2.47064	1.30489	0	0	up	yes	C1R	protein_coding	chrNC_010447.5:63644097-63655149:+
gene1503	2780	37.3862	309	4.09883	9.1212	3.18922	0	0	up	yes	C1H14orf37	protein_coding	chrNC_010443.5:187118498-187259069:-
gene22871	3997	53.7528	9523	126.321	0.425526	-1.23268	0	0	down	yes	RHOU	protein_coding	chrNC_010456.5:60667104-60677582:-
gene21058	1446	19.4462	5252	69.6668	0.279132	-1.84098	0	0	down	yes	AGTR1	protein_coding	chrNC_010455.5:88934873-88980317:+
gene8453	4902	65.9235	10849	143.91	0.458089	-1.1263	0	0	down	yes	CNN3	protein_coding	chrNC_010446.5:122504450-122528351:+
gene13749	4029	54.1831	9497	125.976	0.430107	-1.21723	0	0	down	yes	HDGFL3	protein_coding	chrNC_010449.5:51730898-51818666:+
gene11743	6957	93.5597	2536	33.6396	2.78124	1.47573	0	0	up	yes	PINK1	protein_coding	chrNC_010448.4:78863195-78884663:+
gene23872	2022	27.1924	6222	82.5337	0.329471	-1.60178	0	0	down	yes	RALB	protein_coding	chrNC_010457.5:31064341-31118437:-
gene16953	971	13.0583	4260	56.5081	0.231087	-2.11349	0	0	down	yes	STEAP2	protein_coding	chrNC_010451.4:70334785-70365687:+
gene19253	12755	171.533	6465	85.757	2.00022	1.00016	0	0	up	yes	STAT3	protein_coding	chrNC_010454.4:20407316-20471091:+
gene18712	7617	102.436	2973	39.4363	2.5975	1.37712	0	0	up	yes	ANKRD10	protein_coding	chrNC_010453.5:77323355-77356049:-
gene23498	6381	85.8135	2209	29.302	2.92859	1.55021	0	0	up	yes	PDCD4	protein_coding	chrNC_010456.5:121271824-121334767:+
gene19278	3402	45.7511	610	8.09153	5.65419	2.49932	0	0	up	yes	LOC100737113	protein_coding	chrNC_010454.4:21024395-21029875:+
gene23876	4272	57.4511	1036	13.7423	4.18059	2.06371	0	0	up	yes	PTPN4	protein_coding	chrNC_010457.5:31305394-31502978:-
gene14607	443	5.95759	3064	40.6434	0.146582	-2.77022	0	0	down	yes	GPR68	protein_coding	chrNC_010449.5:112885160-112904214:-
gene22827	4879	65.6142	1363	18.0799	3.62912	1.85962	0	0	up	yes	IRF2BP2	protein_coding	chrNC_010456.5:56545792-56551131:+
gene10104	6131	82.4514	2082	27.6173	2.9855	1.57797	0	0	up	yes	CRISPLD2	protein_coding	chrNC_010448.4:3881715-3944592:-
gene22051	5924	79.6676	12201	161.844	0.49225	-1.02254	0	0	down	yes	SUMO3	protein_coding	chrNC_010455.5:207475303-207484362:-
gene23593	7386	99.329	2855	37.871	2.62282	1.39112	0	0	up	yes	FGFR2	protein_coding	chrNC_010456.5:131183095-131285001:-
gene15028	5427	72.9838	11470	152.147	0.479692	-1.05982	0	0	down	yes	FRYL	protein_coding	chrNC_010450.4:38395780-38745838:-
gene23239	4080	54.869	951	12.6148	4.34956	2.12087	0	0	up	yes	LIPA	protein_coding	chrNC_010456.5:101131372-101254739:-
gene24007	5637	75.808	1803	23.9165	3.1697	1.66435	0	0	up	yes	FGFR1	protein_coding	chrNC_010457.5:48053895-48106634:+
gene24594	4158	55.918	9564	126.865	0.440769	-1.18191	0	0	down	yes	DNPEP	protein_coding	chrNC_010457.5:121391746-121404138:-
gene12406	5186	69.7428	1550	20.5605	3.39208	1.76217	0	0	up	yes	PDE4B	protein_coding	chrNC_010448.4:146167262-146720105:-
gene24807	1740	23.4	5612	74.4421	0.314338	-1.66961	0	0	down	yes	CAPN10	protein_coding	chrNC_010457.5:139557643-139568764:+
gene25119	626	8.41863	3431	45.5116	0.184978	-2.43458	0	0	down	yes	ADAMTS6	protein_coding	chrNC_010458.4:43702519-44010820:-
gene7572	3694	49.678	784	10.3996	4.77691	2.25608	0	0	up	yes	SPIDR	protein_coding	chrNC_010446.5:79874937-80190744:-
gene11544	287	3.85966	2608	34.5946	0.111568	-3.164	0	0	down	yes	CHD5	protein_coding	chrNC_010448.4:67017410-67086685:-
gene13705	5181	69.6756	1574	20.8788	3.33714	1.73861	0	0	up	yes	TBC1D2B	protein_coding	chrNC_010449.5:47839380-47927287:+
gene26976	6432	86.4994	2314	30.6948	2.81805	1.4947	0	0	up	yes	GPM6B	protein_coding	chrNC_010461.5:10429496-10582768:-
gene7992	1794	24.1262	5674	75.2645	0.320552	-1.64137	0	0	down	yes	S100A16	protein_coding	chrNC_010446.5:96030930-96038602:+
gene7137	2008	27.0042	91	1.2071	22.3711	4.48357	0	0	up	yes	SNTB1	protein_coding	chrNC_010446.5:18288756-18524362:+
gene12043	305	4.10173	2640	35.0191	0.117128	-3.09384	0	0	down	yes	RHBDL2	protein_coding	chrNC_010448.4:94822017-94864106:-
gene14090	4647	62.4942	1288	17.0851	3.65782	1.87099	0	0	up	yes	SLC22A17	protein_coding	chrNC_010449.5:75734724-75741115:+
gene19162	7408	99.6249	2961	39.2771	2.53646	1.34282	0	0	up	yes	HEXIM1	protein_coding	chrNC_010454.4:18267023-18270089:-
gene7281	2674	35.9607	7110	94.3128	0.381292	-1.39103	0	0	down	yes	CPQ	protein_coding	chrNC_010446.5:39492663-39855959:-
gene14740	2262	30.42	6429	85.2795	0.35671	-1.48718	0	0	down	yes	SPON2	protein_coding	chrNC_010450.4:447176-450829:-
gene1141	4702	63.2338	10234	135.752	0.465804	-1.10221	0	0	down	yes	SELENOS	protein_coding	chrNC_010443.5:139829002-139836923:-
gene20868	4378	58.8766	1165	15.4535	3.80992	1.92976	0	0	up	yes	TMCC1	protein_coding	chrNC_010455.5:69039173-69223806:-
gene10474	2305	30.9983	6488	86.0621	0.360185	-1.47319	0	0	down	yes	AKTIP	protein_coding	chrNC_010448.4:31706253-31757878:+
gene2470	2868	38.5697	438	5.80999	6.63851	2.73086	0	0	up	yes	PNPLA2	protein_coding	chrNC_010444.4:513065-517962:+
gene20961	1956	26.3048	5870	77.8644	0.337829	-1.56564	0	0	down	yes	PPP2R3A	protein_coding	chrNC_010455.5:76945318-77147650:+
gene4545	2832	38.0855	7321	97.1117	0.392183	-1.3504	0	0	down	yes	RASA1	protein_coding	chrNC_010444.4:94879615-94992725:+
gene13849	2967	39.9011	7536	99.9636	0.399156	-1.32498	0	0	down	yes	PRC1	protein_coding	chrNC_010449.5:55869749-55900640:+
gene2671	755	10.1535	3617	47.9788	0.211624	-2.24043	0	0	down	yes	EHBP1L1	protein_coding	chrNC_010444.4:6662460-6678721:-
gene21605	492	6.61656	3027	40.1526	0.164785	-2.60134	0	0	down	yes	ZBED2	protein_coding	chrNC_010455.5:148156510-148158769:+
gene21884	5755	77.3949	1974	26.1847	2.95572	1.56351	0	0	up	yes	PAXBP1	protein_coding	chrNC_010455.5:196336952-196371258:-
gene24056	2175	29.25	179	2.3744	12.3189	3.6228	0	0	up	yes	DUSP4	protein_coding	chrNC_010457.5:55491084-55508460:+
gene21330	1034	13.9055	4152	55.0755	0.252481	-1.98575	0	0	down	yes	C13H3orf70	protein_coding	chrNC_010455.5:122958339-123058988:-
gene22661	1871	25.1617	5676	75.2911	0.334193	-1.58125	0	0	down	yes	YWHAH	protein_coding	chrNC_010456.5:48544031-48556496:+
gene8191	9001	121.048	4090	54.2531	2.23117	1.1578	0	0	up	yes	TBX15	protein_coding	chrNC_010446.5:101918891-102032280:+
gene14523	6259	84.1728	2305	30.5754	2.75296	1.46098	0	0	up	yes	C7H14orf1	protein_coding	chrNC_010449.5:98811710-98822641:-
gene11665	4206	56.5635	1119	14.8433	3.8107	1.93006	0	0	up	yes	EFHD2	protein_coding	chrNC_010448.4:74651814-74668352:+
gene9582	2561	34.4411	336	4.45698	7.72745	2.94999	0	0	up	yes	LPCAT3	protein_coding	chrNC_010447.5:63707674-63746369:+
gene5080	6242	83.9442	2313	30.6815	2.73599	1.45206	0	0	up	yes	SLC26A2	protein_coding	chrNC_010444.4:150996868-151027483:+
gene27741	10000	134.483	4814	63.8568	2.10601	1.07451	0	0	up	yes	SLC25A5	protein_coding	chrNC_010461.5:97919295-97922245:+
gene25650	10277	138.208	5009	66.4434	2.08009	1.05664	0	0	up	yes	APMAP	protein_coding	chrNC_010459.5:30768485-30795002:-
gene15489	3356	45.1324	8044	106.702	0.422976	-1.24135	0	0	down	yes	FAT4	protein_coding	chrNC_010450.4:99141967-99312131:-
gene23009	3476	46.7462	755	10.0149	4.66765	2.2227	0	0	up	yes	CHST3	protein_coding	chrNC_010456.5:74850931-74891527:+
gene12235	5120	68.8552	1651	21.9002	3.14404	1.65262	0	0	up	yes	RNF125	protein_coding	chrNC_010448.4:115857697-115905550:+
gene6096	8033	108.03	3487	46.2544	2.33556	1.22377	0	0	up	yes	CIAO1	protein_coding	chrNC_010445.4:46960880-46967003:-
gene7414	1791	24.0859	17	0.225502	106.81	6.7389	0	0	up	yes	PI15	protein_coding	chrNC_010446.5:61114490-61142869:-
gene26913	2032	27.3269	5880	77.9971	0.350358	-1.5131	0	0	down	yes	LOC100519997	protein_coding	chrNC_010461.5:486396-517329:-
gene19887	4671	62.8169	9984	132.436	0.47432	-1.07607	0	0	down	yes	TAX1BP3	protein_coding	chrNC_010454.4:49754162-49759026:-
gene4153	4960	66.7035	1564	20.7462	3.21522	1.68492	0	0	up	yes	PTPRS	protein_coding	chrNC_010444.4:73607815-73680685:+
gene2814	178	2.39379	2150	28.5193	0.0839358	-3.57457	0	0	down	yes	FADS3	protein_coding	chrNC_010444.4:9607627-9627352:+
gene25914	8140	109.469	3564	47.2758	2.31554	1.21135	0	0	up	yes	TOP1	protein_coding	chrNC_010459.5:43710270-43799700:+
gene3796	4365	58.7018	1234	16.3688	3.5862	1.84246	0	0	up	yes	TECR	protein_coding	chrNC_010444.4:64723698-64752209:-
gene15498	5443	73.199	11085	147.04	0.497816	-1.00632	0	0	down	yes	FGF2	protein_coding	chrNC_010450.4:101278877-101344084:-
gene11409	9289	124.921	4368	57.9407	2.15602	1.10837	0	0	up	yes	LOC100513362	protein_coding	chrNC_010448.4:62204719-62230976:-
gene20285	2486	33.4324	328	4.35086	7.6841	2.94188	0	0	up	yes	THRB	protein_coding	chrNC_010455.5:10900716-11360587:-
gene19916	5298	71.249	10852	143.95	0.494958	-1.01462	0	0	down	yes	TXNDC17	protein_coding	chrNC_010454.4:50734669-50737309:-
gene1073	911	12.2514	3809	50.5257	0.242479	-2.04407	0	0	down	yes	C1H15orf52	protein_coding	chrNC_010443.5:130974635-130983973:+
gene27058	2008	27.0042	5785	76.7369	0.351906	-1.50674	0	0	down	yes	ACOT9	protein_coding	chrNC_010461.5:19835674-19864570:-
gene9966	3320	44.6483	714	9.47108	4.71418	2.23701	0	0	up	yes	DUSP6	protein_coding	chrNC_010447.5:93303058-93307510:+
gene20652	8541	114.862	3885	51.5338	2.22886	1.15631	0	0	up	yes	NEK4	protein_coding	chrNC_010455.5:34844972-34909028:-
gene19622	642	8.6338	3232	42.8719	0.201386	-2.31196	0	0	down	yes	DUSP14	protein_coding	chrNC_010454.4:38941052-38978568:+
gene27832	2732	36.7407	6954	92.2435	0.398301	-1.32807	0	0	down	yes	RAP2C	protein_coding	chrNC_010461.5:108332623-108348432:-
gene6410	4784	64.3366	1500	19.8972	3.23345	1.69307	0	0	up	yes	PELI1	protein_coding	chrNC_010445.4:77740460-77796911:+
gene25912	2190	29.4517	224	2.97132	9.91201	3.30918	0	0	up	yes	MAFB	protein_coding	chrNC_010459.5:43408390-43411782:-
gene12485	5816	78.2152	2116	28.0683	2.7866	1.47851	0	0	up	yes	DHCR24	protein_coding	chrNC_010448.4:157483794-157519060:+
gene28785	9603	129.144	4632	61.4426	2.10186	1.07167	0	0	up	yes	HMOX1	protein_coding	chrNW_018084968.1:1954828-1963836:+
gene8407	2838	38.1662	497	6.59261	5.78924	2.53337	0	0	up	yes	S1PR1	protein_coding	chrNC_010446.5:117064632-117069724:-
gene6246	2727	36.6735	6923	91.8323	0.399353	-1.32426	0	0	down	yes	VAMP8	protein_coding	chrNC_010445.4:59187900-59193165:-
gene8056	1697	22.8217	47	0.623446	36.6058	5.194	0	0	up	yes	SELENBP1	protein_coding	chrNC_010446.5:97860925-97894007:+
gene27471	1983	26.6679	154	2.04278	13.0547	3.7065	0	0	up	yes	SLC16A2	protein_coding	chrNC_010461.5:59748685-59861018:+
gene26531	4810	64.6863	1531	20.3084	3.18519	1.67138	0	0	up	yes	AHCYL2	protein_coding	chrNC_010460.4:19260226-19441839:-
gene21981	6320	84.9932	2456	32.5784	2.60888	1.38343	0	0	up	yes	MX1	protein_coding	chrNC_010455.5:204843049-204868927:+
gene26447	4236	56.9669	1214	16.1035	3.53755	1.82275	0	0	up	yes	CREB3L2	protein_coding	chrNC_010460.4:11533184-11666132:+
gene13967	5250	70.6035	1798	23.8501	2.9603	1.56574	0	0	up	yes	NFKBIA	protein_coding	chrNC_010449.5:64508119-64510754:+
gene24860	4828	64.9283	1553	20.6003	3.15182	1.65619	0	0	up	yes	MYO10	protein_coding	chrNC_010458.4:5907111-6145485:-
gene17660	4130	55.5414	9029	119.768	0.463742	-1.10861	0	0	down	yes	CDC42BPA	protein_coding	chrNC_010452.4:14649278-14940988:-
gene12331	5720	76.9242	2099	27.8428	2.7628	1.46613	0	0	up	yes	IFI44L	protein_coding	chrNC_010448.4:134660230-134679212:-
gene22955	3351	45.0652	760	10.0813	4.4702	2.16034	0	0	up	yes	TET1	protein_coding	chrNC_010456.5:71675671-71812732:+
gene4209	1805	24.2742	5351	70.98	0.341986	-1.54799	0	0	down	yes	MFSD12	protein_coding	chrNC_010444.4:75098531-75120795:+
gene287	2652	35.6649	6740	89.4048	0.398914	-1.32585	0	0	down	yes	STX7	protein_coding	chrNC_010443.5:31184905-31237052:+
gene8378	2550	34.2931	6573	87.1896	0.393317	-1.34624	0	0	down	yes	SLC25A24	protein_coding	chrNC_010446.5:111580186-111632390:+
gene8654	3946	53.0669	8715	115.603	0.459045	-1.12329	0	0	down	yes	TSPO	protein_coding	chrNC_010447.5:5723190-5735097:-
gene19836	4381	58.9169	9357	124.119	0.474682	-1.07497	0	0	down	yes	PAFAH1B1	protein_coding	chrNC_010454.4:48567329-48735836:+
gene13596	3113	41.8645	7443	98.73	0.42403	-1.23776	0	0	down	yes	VEGFA	protein_coding	chrNC_010449.5:38746393-38762282:+
gene21150	883	11.8748	3645	48.3502	0.2456	-2.02562	0	0	down	yes	SHOX2	protein_coding	chrNC_010455.5:97879586-97892276:-
gene18783	674	9.06414	3208	42.5535	0.213006	-2.23104	0	0	down	yes	SLC16A3	protein_coding	chrNC_010454.4:796882-807480:-
gene20621	2493	33.5266	6445	85.4917	0.392162	-1.35048	0	0	down	yes	PARP3	protein_coding	chrNC_010455.5:34075807-34084384:+
gene20210	3096	41.6359	7393	98.0667	0.424567	-1.23594	0	0	down	yes	MPRIP	protein_coding	chrNC_010454.4:61077617-61185906:-
gene1803	8822	118.641	4184	55.5	2.13767	1.09604	0	0	up	yes	PCSK5	protein_coding	chrNC_010443.5:228854587-229308054:+
gene23465	2807	37.7493	519	6.88444	5.48329	2.45504	0	0	up	yes	COL17A1	protein_coding	chrNC_010456.5:114959404-115007734:-
gene13389	3751	50.4445	8367	110.987	0.45451	-1.13762	0	0	down	yes	RAB23	protein_coding	chrNC_010449.5:28632065-28658958:+
gene15665	2146	28.86	3	0.0397944	725.228	9.50229	0	0	up	yes	ADH1C	protein_coding	chrNC_010450.4:121089355-121105010:+
gene8724	7166	96.3704	3072	40.7495	2.36495	1.24181	0	0	up	yes	TNRC6B	protein_coding	chrNC_010447.5:8052434-8311811:-
gene18627	2194	29.5055	5933	78.7001	0.374911	-1.41538	0	0	down	yes	RAP2A	protein_coding	chrNC_010453.5:66679162-66718565:+
gene20077	4494	60.4366	1407	18.6636	3.23821	1.6952	0	0	up	yes	NTN1	protein_coding	chrNC_010454.4:54089444-54292191:+
gene11449	2685	36.1086	6719	89.1263	0.40514	-1.30351	0	0	down	yes	UBE2M	protein_coding	chrNC_010448.4:63105532-63108615:-
gene6979	1450	19.5	4659	61.8008	0.31553	-1.66415	0	0	down	yes	GSDMD	protein_coding	chrNC_010446.5:995753-1001964:-
gene20536	5845	78.6052	2229	29.5673	2.65852	1.41062	0	0	up	yes	WDR6	protein_coding	chrNC_010455.5:31642207-31651367:+
gene1179	688	9.25242	3194	42.3678	0.218383	-2.19507	0	0	down	yes	PCSK6	protein_coding	chrNC_010443.5:145508658-145697017:+
gene19984	1597	21.4769	17	0.225502	95.2405	6.5735	0	0	up	yes	SLC2A4	protein_coding	chrNC_010454.4:52628746-52634965:+
gene12136	1238	16.649	4253	56.4152	0.295115	-1.76065	0	0	down	yes	EPB41L3	protein_coding	chrNC_010448.4:101420376-101671177:+
gene13243	384	5.16414	2505	33.2284	0.155414	-2.68581	0	0	down	yes	IER3	protein_coding	chrNC_010449.5:23265560-23266905:-
gene26992	3111	41.8376	7326	97.178	0.430526	-1.21583	0	0	down	yes	CXH4orf3	protein_coding	chrNC_010461.5:12139795-12141315:-
gene24063	7915	106.443	3624	48.0717	2.21426	1.14682	0	0	up	yes	HERC2	protein_coding	chrNC_010457.5:56438117-56649805:+
gene18807	4265	57.3569	9042	119.94	0.478212	-1.06428	0	0	down	yes	ARHGDIA	protein_coding	chrNC_010454.4:1113358-1117319:+
gene12127	9494	127.678	4732	62.7691	2.03409	1.02438	0	0	up	yes	ARHGAP28	protein_coding	chrNC_010448.4:100494385-100681008:-
gene1491	3475	46.7328	876	11.62	4.02176	2.00783	0	0	up	yes	TMEM260	protein_coding	chrNC_010443.5:185821497-185886579:+
gene13781	1206	16.2186	4171	55.3275	0.293139	-1.77035	0	0	down	yes	FES	protein_coding	chrNC_010449.5:53472947-53485084:+
gene26605	5052	67.9407	1773	23.5185	2.88882	1.53048	0	0	up	yes	CPED1	protein_coding	chrNC_010460.4:25655730-25937923:-
gene22814	4738	63.718	1586	21.038	3.02871	1.5987	0	0	up	yes	B3GALNT2	protein_coding	chrNC_010456.5:55749409-55818738:+
gene17183	7062	94.9718	3058	40.5638	2.34129	1.22731	0	0	up	yes	ARMC10	protein_coding	chrNC_010451.4:103179754-103210658:+
gene13480	3814	51.2918	8352	110.788	0.462973	-1.111	0	0	down	yes	MTCH1	protein_coding	chrNC_010449.5:32617426-32635575:-
gene7620	7462	100.351	3346	44.3841	2.26097	1.17694	0	0	up	yes	CREG1	protein_coding	chrNC_010446.5:83458358-83469931:+
gene19571	594	7.98828	2939	38.9853	0.204905	-2.28697	0	0	down	yes	SKA2	protein_coding	chrNC_010454.4:35396565-35433294:-
gene16256	998	13.4214	3743	49.6502	0.270319	-1.88727	0	0	down	yes	LRRC32	protein_coding	chrNC_010451.4:10802228-10815892:-
gene25407	1460	19.6345	4582	60.7794	0.323045	-1.63019	0	0	down	yes	NKD2	protein_coding	chrNC_010458.4:79400323-79419779:-
gene19939	108	1.45241	1722	22.842	0.0635853	-3.97516	0	0	down	yes	ENO3	protein_coding	chrNC_010454.4:51954614-51959991:-
gene1267	411	5.52725	2491	33.0426	0.167276	-2.5797	0	0	down	yes	CCBE1	protein_coding	chrNC_010443.5:161320627-161556539:+
gene19281	3186	42.8462	769	10.2006	4.20035	2.07051	0	0	up	yes	LOC110255312	protein_coding	chrNC_010454.4:21074965-21079393:+
gene8802	3225	43.3707	790	10.4792	4.13874	2.04919	0	0	up	yes	TST	protein_coding	chrNC_010447.5:10749264-10759623:+
gene4684	4358	58.6076	9028	119.755	0.489397	-1.03092	0	0	down	yes	AP3S1	protein_coding	chrNC_010444.4:119965539-120039948:+
gene13792	2054	27.6228	254	3.36926	8.19847	3.03535	0	0	up	yes	KLF15	protein_coding	chrNC_010449.5:53877813-53890558:-
gene19786	8797	118.305	4347	57.6621	2.05169	1.03681	0	0	up	yes	GOSR1	protein_coding	chrNC_010454.4:46541124-46597075:+
gene10813	1029	13.8383	3736	49.5573	0.279238	-1.84043	0	0	down	yes	ERF	protein_coding	chrNC_010448.4:49678858-49686422:+
gene13973	1898	25.5248	5256	69.7198	0.366106	-1.44967	0	0	down	yes	FAM177A1	protein_coding	chrNC_010449.5:64788829-64808640:-
gene12661	7228	97.2042	3261	43.2565	2.24716	1.1681	0	0	up	yes	KDM4A	protein_coding	chrNC_010448.4:167597954-167642381:-
gene203	8649	116.314	4252	56.402	2.06224	1.04421	0	0	up	yes	FUCA2	protein_coding	chrNC_010443.5:21742192-21762901:+
gene21287	2714	36.4986	548	7.26912	5.02106	2.32799	0	0	up	yes	MCCC1	protein_coding	chrNC_010455.5:120983226-121070695:-
gene3165	3548	47.7145	7814	103.651	0.460337	-1.11924	0	0	down	yes	CD59	protein_coding	chrNC_010444.4:27186587-27207303:+
gene11824	3663	49.2611	7979	105.84	0.46543	-1.10336	0	0	down	yes	STMN1	protein_coding	chrNC_010448.4:83356404-83362546:-
gene15254	916	12.3186	3500	46.4268	0.265334	-1.91412	0	0	down	yes	RUFY3	protein_coding	chrNC_010450.4:67494552-67582144:+
gene18620	3151	42.3755	7204	95.5597	0.443446	-1.17317	0	0	down	yes	UGGT2	protein_coding	chrNC_010453.5:65307208-65476791:-
gene23261	3596	48.36	1007	13.3577	3.6204	1.85615	0	0	up	yes	PPP1R3C	protein_coding	chrNC_010456.5:103273401-103278757:-
gene5608	4854	65.278	1742	23.1073	2.82499	1.49825	0	0	up	yes	IL4R	protein_coding	chrNC_010445.4:19526343-19576792:-
gene10925	323	4.3438	2235	29.6469	0.146518	-2.77085	0	0	down	yes	DMPK	protein_coding	chrNC_010448.4:52100259-52110822:-
gene1480	2047	27.5286	5462	72.4524	0.379955	-1.3961	0	0	down	yes	DLGAP5	protein_coding	chrNC_010443.5:184500791-184550028:-
gene23124	1571	21.1273	89	1.18057	17.8958	4.16155	0	0	up	yes	SNCG	protein_coding	chrNC_010456.5:87916353-87922111:+
gene1138	4658	62.6421	1641	21.7676	2.87777	1.52495	0	0	up	yes	ALDH1A3	protein_coding	chrNC_010443.5:139451080-139491514:+
gene823	5798	77.9732	2357	31.2652	2.49393	1.31842	0	0	up	yes	TLN2	protein_coding	chrNC_010443.5:109208663-109680663:-
gene10714	3944	53.04	1228	16.2892	3.25615	1.70317	0	0	up	yes	ECH1	protein_coding	chrNC_010448.4:47627056-47638961:-
gene12121	5954	80.0711	2470	32.7641	2.44387	1.28917	0	0	up	yes	PTPRM	protein_coding	chrNC_010448.4:99350301-100092966:-
gene26669	7353	98.8852	3411	45.2463	2.18549	1.12796	0	0	up	yes	DPY19L1	protein_coding	chrNC_010460.4:38801343-39084190:+
gene734	2624	35.2883	6318	83.8071	0.421066	-1.24788	0	0	down	yes	SMAD2	protein_coding	chrNC_010443.5:97415360-97511388:-
gene23827	3418	45.9662	7522	99.7779	0.460686	-1.11815	0	0	down	yes	SLC35F5	protein_coding	chrNC_010457.5:19924437-19971767:-
gene7874	48	0.645518	1445	19.1677	0.0336775	-4.89207	0	0	down	yes	CRABP2	protein_coding	chrNC_010446.5:93388198-93393861:+
gene21227	2934	39.4573	693	9.19251	4.29233	2.10176	0	0	up	yes	PLD1	protein_coding	chrNC_010455.5:110152268-110376319:-
gene5927	2810	37.7897	6587	87.3753	0.432498	-1.20923	0	0	down	yes	JPT2	protein_coding	chrNC_010445.4:40245473-40256960:-
gene6614	3919	52.7038	8229	109.156	0.48283	-1.05041	0	0	down	yes	CDC42EP3	protein_coding	chrNC_010445.4:102537662-102567669:+
gene28885	501	6.73759	2583	34.263	0.196643	-2.34635	0	0	down	yes	CRIP2	protein_coding	chrNW_018084979.1:3499328-3504407:+
gene5516	1914	25.74	5159	68.4332	0.376134	-1.41068	0	0	down	yes	HSD3B7	protein_coding	chrNC_010445.4:17459627-17463381:-
gene20757	2462	33.1097	6031	80.0001	0.413871	-1.27275	0	0	down	yes	FOXP1	protein_coding	chrNC_010455.5:52346844-52974358:-
gene9377	2949	39.659	6780	89.9354	0.440972	-1.18124	0	0	down	yes	STK38L	protein_coding	chrNC_010447.5:46490981-46574716:-
gene22810	3381	45.4687	936	12.4159	3.66214	1.87269	0	0	up	yes	LYST	protein_coding	chrNC_010456.5:55433163-55633804:+
gene19518	3774	50.7538	1161	15.4004	3.29561	1.72054	0	0	up	yes	MMD	protein_coding	chrNC_010454.4:31695843-31723723:-
gene25102	2454	33.0021	6002	79.6154	0.414519	-1.27049	0	0	down	yes	KIF2A	protein_coding	chrNC_010458.4:41016680-41101122:+
gene18317	6343	85.3025	2770	36.7435	2.32156	1.2151	0	0	up	yes	STARD13	protein_coding	chrNC_010453.5:9518135-9738370:-
gene21233	1308	17.5904	4106	54.4653	0.322964	-1.63055	0	0	down	yes	ECT2	protein_coding	chrNC_010455.5:111248215-111310746:+
gene26644	3418	45.9662	7443	98.73	0.465575	-1.10291	0	0	down	yes	IFRD1	protein_coding	chrNC_010460.4:33198002-33248912:-
gene26205	3711	49.9066	7869	104.381	0.47812	-1.06455	0	0	down	yes	ARFGAP1	protein_coding	chrNC_010459.5:62380060-62391836:+
gene9373	4130	55.5414	8456	112.167	0.495166	-1.01402	0	0	down	yes	PPFIBP1	protein_coding	chrNC_010447.5:46031398-46222915:-
gene14521	1475	19.8362	84	1.11424	17.8024	4.154	0	0	up	yes	FLVCR2	protein_coding	chrNC_010449.5:98718319-98772196:+
gene21062	1583	21.2886	4552	60.3814	0.352569	-1.50402	0	0	down	yes	GYG1	protein_coding	chrNC_010455.5:89221086-89259569:+
gene10475	3305	44.4466	920	12.2036	3.64208	1.86476	0	0	up	yes	RBL2	protein_coding	chrNC_010448.4:31757718-31802047:-
gene9178	150	2.01724	1682	22.3114	0.090413	-3.46733	0	0	down	yes	INHBE	protein_coding	chrNC_010447.5:22732774-22734716:+
gene23423	7472	100.486	3592	47.6472	2.10895	1.07653	0	0	up	yes	NOLC1	protein_coding	chrNC_010456.5:113154619-113166922:+
gene17975	3706	49.8393	7812	103.625	0.48096	-1.05601	0	0	down	yes	RSU1	protein_coding	chrNC_010452.4:45079014-45492073:+
gene20604	7496	100.808	3615	47.9523	2.10226	1.07194	0	0	up	yes	RBM15B	protein_coding	chrNC_010455.5:33664387-33671047:+
gene3067	1488	20.011	4359	57.8213	0.346084	-1.5308	0	0	down	yes	PACSIN3	protein_coding	chrNC_010444.4:15380297-15389893:+
gene2083	4075	54.8018	1375	18.2391	3.00463	1.58719	0	0	up	yes	KIF12	protein_coding	chrNC_010443.5:254711820-254720559:-
gene1431	3699	49.7452	7786	103.28	0.481655	-1.05393	0	0	down	yes	MAP4K5	protein_coding	chrNC_010443.5:180164427-180299491:-
gene19528	4262	57.3166	1488	19.738	2.90386	1.53797	0	0	up	yes	TRIM25	protein_coding	chrNC_010454.4:33184039-33212440:-
gene2553	2127	28.6045	5404	71.683	0.399041	-1.32539	0	0	down	yes	CPT1A	protein_coding	chrNC_010444.4:4250642-4293914:+
gene16823	6045	81.2949	2634	34.9395	2.32673	1.21831	0	0	up	yes	SNX19	protein_coding	chrNC_010451.4:57509186-57558361:-
gene19735	3218	43.2766	895	11.872	3.64526	1.86602	0	0	up	yes	PIGS	protein_coding	chrNC_010454.4:44808326-44821428:-
gene10378	2989	40.1969	775	10.2802	3.91012	1.96721	0	0	up	yes	PDP2	protein_coding	chrNC_010448.4:27565423-27572868:+
gene15162	2339	31.4555	451	5.98243	5.25799	2.39451	0	0	up	yes	PPAT	protein_coding	chrNC_010450.4:55652194-55701077:-
gene3802	3809	51.2245	7902	104.819	0.488697	-1.03299	8.29592e-308	2.36436e-307	down	yes	DDX39A	protein_coding	chrNC_010444.4:64836040-64844996:+
gene27403	5993	80.5956	2619	34.7405	2.31993	1.21408	4.82692e-307	1.37175e-306	up	yes	PJA1	protein_coding	chrNC_010461.5:55274294-55280583:-
gene7104	1649	22.1762	4581	60.7661	0.364944	-1.45425	1.25696e-305	3.55857e-305	down	yes	TMEM65	protein_coding	chrNC_010446.5:15263400-15317350:+
gene20867	3732	50.189	1200	15.9178	3.15302	1.65673	2.0621e-305	5.82694e-305	up	yes	PLXND1	protein_coding	chrNC_010455.5:68946658-68996625:-
gene22171	2581	34.71	6055	80.3184	0.432155	-1.21038	1.56386e-304	4.4107e-304	down	yes	DPYSL2	protein_coding	chrNC_010456.5:10428598-10545705:+
gene25270	890	11.969	3244	43.031	0.278147	-1.84608	1.75226e-304	4.93741e-304	down	yes	PTTG1	protein_coding	chrNC_010458.4:63104698-63112382:-
gene19660	3977	53.4838	1358	18.0136	2.96908	1.57002	3.12822e-301	8.75661e-301	up	yes	RFFL	protein_coding	chrNC_010454.4:40075259-40151034:+
gene24386	2821	37.9376	713	9.45781	4.01125	2.00405	1.57044e-299	4.38779e-299	up	yes	ANKRD44	protein_coding	chrNC_010457.5:100868469-101211172:-
gene8780	1200	16.1379	3779	50.1277	0.321936	-1.63515	2.03464e-299	5.67943e-299	down	yes	TRIOBP	protein_coding	chrNC_010447.5:10066080-10132668:-
gene4591	954	12.8297	3336	44.2514	0.289927	-1.78624	2.49915e-299	6.96954e-299	down	yes	GLRX	protein_coding	chrNC_010444.4:102425580-102437851:-
gene2702	1340	18.0207	4020	53.3245	0.337944	-1.56514	5.40146e-299	1.50493e-298	down	yes	ARL2	protein_coding	chrNC_010444.4:7157963-7167024:-
gene17856	7689	103.404	3836	50.8838	2.03216	1.02301	6.535e-299	1.81906e-298	up	yes	SIGMAR1	protein_coding	chrNC_010452.4:32160767-32163540:+
gene14990	1496	20.1186	4281	56.7867	0.354285	-1.49702	2.94779e-298	8.15967e-298	down	yes	LIMCH1	protein_coding	chrNC_010450.4:32433035-32792553:+
gene16998	3223	43.3438	6973	92.4955	0.468605	-1.09356	3.77475e-298	1.04391e-297	down	yes	SGCE	protein_coding	chrNC_010451.4:74402714-74473904:-
gene6299	6071	81.6445	2713	35.9874	2.2687	1.18186	4.00353e-298	1.10615e-297	up	yes	WBP1	protein_coding	chrNC_010445.4:68582151-68584706:-
gene12040	3512	47.2304	7368	97.7351	0.483249	-1.04916	1.67222e-294	4.59473e-294	down	yes	RRAGC	protein_coding	chrNC_010448.4:94785906-94803017:-
gene27759	468	6.2938	2345	31.106	0.202334	-2.30519	8.6458e-293	2.37122e-292	down	yes	TMEM255A	protein_coding	chrNC_010461.5:98412286-98464683:-
gene23509	3891	52.3273	1339	17.7616	2.94609	1.5588	1.00809e-291	2.75721e-291	up	yes	GPAM	protein_coding	chrNC_010456.5:122538600-122582390:-
gene18565	1686	22.6738	202	2.67949	8.46198	3.081	2.2618e-291	6.17489e-291	up	yes	SPRY2	protein_coding	chrNC_010453.5:52153695-52158766:-
gene23257	1593	21.4231	4395	58.2988	0.367471	-1.4443	2.51284e-290	6.85398e-290	down	yes	PCGF5	protein_coding	chrNC_010456.5:102827140-102961862:+
gene12740	3256	43.7876	6951	92.2037	0.474901	-1.0743	7.99664e-289	2.17519e-288	down	yes	SMAP2	protein_coding	chrNC_010448.4:170715106-170763818:-
gene22179	3261	43.8549	983	13.0393	3.36328	1.74987	2.21973e-288	6.03245e-288	up	yes	EPHX2	protein_coding	chrNC_010456.5:11217125-11293018:+
gene20623	580	7.80001	2555	33.8916	0.230146	-2.11938	1.24798e-287	3.3885e-287	down	yes	PCBP4	protein_coding	chrNC_010455.5:34090015-34099959:-
gene26252	3409	45.8452	7164	95.0291	0.482433	-1.0516	1.72609e-287	4.68238e-287	down	yes	DNAJB6	protein_coding	chrNC_010460.4:1444737-1499904:-
gene25865	238	3.20069	1792	23.7705	0.13465	-2.89272	1.85105e-287	5.01223e-287	down	yes	MYL9	protein_coding	chrNC_010459.5:39788165-39795240:+
gene14219	4196	56.429	1540	20.4278	2.76236	1.4659	2.39665e-287	6.48371e-287	up	yes	RNASE4	protein_coding	chrNC_010449.5:78244284-78244931:-
gene3286	1681	22.6066	207	2.74582	8.2331	3.04144	4.90109e-287	1.3247e-286	up	yes	PDE3B	protein_coding	chrNC_010444.4:44416934-44614075:-
gene1082	5789	77.8521	2579	34.2099	2.27572	1.18632	4.53511e-286	1.21916e-285	up	yes	EIF2AK4	protein_coding	chrNC_010443.5:131244818-131355240:-
gene14099	7070	95.0794	3473	46.0687	2.06386	1.04535	7.2252e-285	1.93709e-284	up	yes	ACIN1	protein_coding	chrNC_010449.5:75951203-75989234:+
gene26135	1843	24.7852	278	3.68762	6.72119	2.74872	1.67538e-284	4.48367e-284	up	yes	PCK1	protein_coding	chrNC_010459.5:57930507-57936523:+
gene10703	693	9.31966	2757	36.5711	0.254837	-1.97235	6.85655e-283	1.83331e-282	down	yes	FAM98C	protein_coding	chrNC_010448.4:47315406-47319486:+
gene7657	6016	80.9049	2749	36.465	2.2187	1.14972	8.15906e-283	2.17963e-282	up	yes	HSD17B7	protein_coding	chrNC_010446.5:87720747-87743037:-
gene17906	3997	53.7528	1435	19.035	2.82389	1.49768	1.27101e-282	3.39237e-282	up	yes	C10H9orf72	protein_coding	chrNC_010452.4:38389366-38415903:+
gene3862	4953	66.6094	2040	27.0602	2.46152	1.29955	1.96506e-282	5.24012e-282	up	yes	MAN2B1	protein_coding	chrNC_010444.4:66329051-66347051:+
gene20656	4443	59.7507	1714	22.7359	2.62804	1.39399	4.00165e-282	1.06615e-281	up	yes	LOC100153598	protein_coding	chrNC_010455.5:34946260-35017817:-
gene14342	858	11.5386	3067	40.6832	0.283622	-1.81796	4.62141e-282	1.23017e-281	down	yes	AVEN	protein_coding	chrNC_010449.5:80447337-80640120:+
gene23793	3276	44.0566	1014	13.4505	3.27546	1.7117	5.93996e-281	1.57974e-280	up	yes	HNMT	protein_coding	chrNC_010457.5:13733412-13768106:-
gene12773	154	2.07104	1545	20.4941	0.101055	-3.30679	1.27098e-280	3.37719e-280	down	yes	TUBB2B	protein_coding	chrNC_010449.5:1952705-1955780:-
gene3588	2451	32.9617	5681	75.3574	0.437406	-1.19296	2.04229e-279	5.41702e-279	down	yes	HOMER3	protein_coding	chrNC_010444.4:58913949-58922474:+
gene10459	3671	49.3687	1251	16.5943	2.97504	1.57291	5.82925e-279	1.54342e-278	up	yes	LPCAT2	protein_coding	chrNC_010448.4:29999504-30056858:-
gene6900	6850	92.1208	3351	44.4504	2.07244	1.05133	1.2172e-278	3.21994e-278	up	yes	PXDN	protein_coding	chrNC_010445.4:132306288-132362853:+
gene26711	728	9.79035	2801	37.1547	0.263502	-1.92411	3.63408e-278	9.59648e-278	down	yes	MTURN	protein_coding	chrNC_010460.4:42767452-42802109:-
gene23075	2427	32.639	564	7.48135	4.36271	2.12523	4.87505e-278	1.28621e-277	up	yes	PPIF	protein_coding	chrNC_010456.5:81674671-81681977:+
gene10527	1309	17.6038	3845	51.0032	0.345151	-1.5347	4.96784e-278	1.30953e-277	down	yes	SHCBP1	protein_coding	chrNC_010448.4:38029869-38063773:+
gene24419	3194	42.9538	6772	89.8293	0.478172	-1.0644	2.93408e-277	7.72747e-277	down	yes	CASP10	protein_coding	chrNC_010457.5:104858082-104895941:+
gene21381	65	0.874139	1275	16.9126	0.0516855	-4.2741	1.02785e-276	2.70465e-276	down	yes	CLDN1	protein_coding	chrNC_010455.5:127714857-127730628:-
gene9725	3714	49.9469	1286	17.0585	2.92797	1.5499	3.01425e-276	7.92464e-276	up	yes	GXYLT1	protein_coding	chrNC_010447.5:73274165-73408359:-
gene27812	4964	66.7573	2077	27.551	2.42304	1.27682	1.84918e-275	4.85732e-275	up	yes	AIFM1	protein_coding	chrNC_010461.5:106676596-106708290:-
gene3594	1710	22.9966	239	3.17029	7.25377	2.85873	6.46392e-275	1.69641e-274	up	yes	COMP	protein_coding	chrNC_010444.4:59061409-59068951:+
gene9735	2948	39.6455	848	11.2486	3.5245	1.81742	8.22766e-275	2.15739e-274	up	yes	ADAMTS20	protein_coding	chrNC_010447.5:74502098-74672703:-
gene2371	6850	92.1208	3372	44.7289	2.05953	1.04232	9.02064e-275	2.36325e-274	up	yes	SETX	protein_coding	chrNC_010443.5:272093449-272170857:-
gene23212	6920	93.0621	3423	45.4054	2.04958	1.03533	1.55226e-274	4.06307e-274	up	yes	CSTF2T	protein_coding	chrNC_010456.5:98104957-98109479:+
gene4018	927	12.4666	3153	41.8239	0.298072	-1.74627	2.42445e-274	6.34048e-274	down	yes	SPC24	protein_coding	chrNC_010444.4:69884304-69890314:-
gene17122	546	7.34276	2421	32.1141	0.228646	-2.12881	3.5148e-274	9.18395e-274	down	yes	CCDC126	protein_coding	chrNC_010451.4:92372070-92419241:+
gene8764	380	5.11035	2067	27.4184	0.186384	-2.42365	5.97831e-274	1.56073e-273	down	yes	MAFF	protein_coding	chrNC_010447.5:9683651-9696128:-
gene12443	1796	24.1531	278	3.68762	6.54979	2.71145	2.26121e-273	5.89293e-273	up	yes	NFIA	protein_coding	chrNC_010448.4:150834002-151229773:-
gene21941	5760	77.4621	2625	34.8201	2.22464	1.15357	2.58056e-272	6.71932e-272	up	yes	HLCS	protein_coding	chrNC_010455.5:200406395-200618967:-
gene7080	2620	35.2345	681	9.03334	3.9005	1.96366	4.64247e-271	1.20461e-270	up	yes	MYC	protein_coding	chrNC_010446.5:12455141-12460360:-
gene12146	4359	58.6211	1705	22.6165	2.59196	1.37404	7.03162e-271	1.82295e-270	up	yes	LPIN2	protein_coding	chrNC_010448.4:103625725-103728151:+
gene23242	1342	18.0476	104	1.37954	13.0823	3.70955	1.50733e-270	3.90098e-270	up	yes	IFIT1	protein_coding	chrNC_010456.5:101237403-101249486:+
gene21475	3175	42.6983	6689	88.7283	0.481225	-1.05522	4.53736e-270	1.17224e-269	down	yes	MYLK	protein_coding	chrNC_010455.5:136509878-136809674:+
gene8940	1576	21.1945	193	2.56011	8.27875	3.04941	6.65181e-270	1.71703e-269	up	yes	KRT6A	protein_coding	chrNC_010447.5:17830147-17851113:-
gene10650	3425	46.0604	7047	93.4771	0.492745	-1.02109	1.36349e-269	3.51652e-269	down	yes	TBCB	protein_coding	chrNC_010448.4:45482542-45492627:+
gene18512	629	8.45897	2564	34.011	0.248713	-2.00745	2.42745e-269	6.25515e-269	down	yes	DIAPH3	protein_coding	chrNC_010453.5:32492735-32994854:-
gene14495	2794	37.5745	783	10.3863	3.61768	1.85507	6.79271e-268	1.74435e-267	up	yes	ALDH6A1	protein_coding	chrNC_010449.5:97360583-97381885:-
gene15732	2810	37.7897	6134	81.3664	0.464439	-1.10644	1.61819e-267	4.14475e-267	down	yes	NUDT9	protein_coding	chrNC_010450.4:131436245-131472984:-
gene2451	720	9.68277	2731	36.2262	0.267286	-1.90354	1.98285e-267	5.07008e-267	down	yes	HRAS	protein_coding	chrNC_010444.4:299662-302539:-
gene8886	1489	20.0245	4074	54.0408	0.370544	-1.43228	5.98899e-266	1.52744e-265	down	yes	FMNL3	protein_coding	chrNC_010447.5:15592665-15646059:-
gene26286	786	10.5704	2846	37.7517	0.279997	-1.83652	1.6008e-265	4.0792e-265	down	yes	PRKAG2	protein_coding	chrNC_010460.4:5475077-5744660:+
gene16346	5820	78.269	2710	35.9476	2.17731	1.12254	1.94412e-263	4.9372e-263	up	yes	CTSC	protein_coding	chrNC_010451.4:21726628-21761796:-
gene27387	3267	43.9355	6768	89.7762	0.489389	-1.03095	4.29891e-263	1.0908e-262	down	yes	LAS1L	protein_coding	chrNC_010461.5:51753600-51773416:-
gene3064	6876	92.4704	3460	45.8962	2.01477	1.01062	2.9597e-262	7.48446e-262	up	yes	NR1H3	protein_coding	chrNC_010444.4:15315283-15336785:-
gene16287	1722	23.1579	267	3.5417	6.53864	2.70899	6.01733e-262	1.51908e-261	up	yes	GAB2	protein_coding	chrNC_010451.4:12663658-12851423:-
gene27068	4207	56.5769	1646	21.8339	2.59125	1.37365	2.15049e-261	5.41978e-261	up	yes	PDK3	protein_coding	chrNC_010461.5:20486205-20598492:+
gene19526	165	2.21897	1496	19.8442	0.11182	-3.16075	2.73041e-261	6.8755e-261	down	yes	C12H17orf67	protein_coding	chrNC_010454.4:33104570-33125799:-
gene2414	3267	43.9355	1072	14.2199	3.08973	1.62748	6.03911e-261	1.51944e-260	up	yes	RXRA	protein_coding	chrNC_010443.5:273698842-273797622:+
gene13401	3139	42.2142	6555	86.9508	0.485495	-1.04247	1.56011e-259	3.91534e-259	down	yes	RGL2	protein_coding	chrNC_010449.5:29655530-29662375:-
gene13382	4758	63.9869	2012	26.6888	2.39752	1.26154	3.04095e-259	7.61891e-259	up	yes	GCLC	protein_coding	chrNC_010449.5:27209565-27253535:+
gene16859	1870	25.1483	338	4.48351	5.60907	2.48776	4.88029e-259	1.2217e-258	up	yes	FMO4	protein_coding	chrNC_010451.4:63908846-63934985:+
gene13416	2569	34.5486	5710	75.7421	0.456135	-1.13247	1.31555e-258	3.28774e-258	down	yes	LEMD2	protein_coding	chrNC_010449.5:29980394-29997077:-
gene7570	4326	58.1773	1734	23.0012	2.52932	1.33875	1.95441e-258	4.88026e-258	up	yes	PRKDC	protein_coding	chrNC_010446.5:79687375-79850146:+
gene24539	435	5.85	2115	28.0551	0.208519	-2.26175	2.51568e-258	6.27653e-258	down	yes	IGFBP5	protein_coding	chrNC_010457.5:118861816-118877787:-
gene13830	1520	20.4414	190	2.52031	8.11065	3.01982	5.18058e-258	1.29038e-257	up	yes	PEX11A	protein_coding	chrNC_010449.5:55256239-55264253:-
gene16272	1615	21.719	4229	56.0969	0.387169	-1.36896	7.35849e-258	1.83132e-257	down	yes	PAK1	protein_coding	chrNC_010451.4:11830095-11973074:-
gene11639	6100	82.0345	2937	38.9588	2.10568	1.07428	3.37457e-257	8.38439e-257	up	yes	VPS13D	protein_coding	chrNC_010448.4:72256865-72514256:+
gene12525	2741	36.8618	786	10.4261	3.53551	1.82192	1.58876e-256	3.93428e-256	up	yes	ECHDC2	protein_coding	chrNC_010448.4:159326146-159347178:+
gene23341	2477	33.3114	646	8.56907	3.8874	1.95881	1.49058e-255	3.68505e-255	up	yes	EXOSC1	protein_coding	chrNC_010456.5:108834609-108842827:-
gene24969	3097	41.6493	991	13.1454	3.16835	1.66373	2.49913e-255	6.16309e-255	up	yes	OXCT1	protein_coding	chrNC_010458.4:26514497-26659739:-
gene22267	3292	44.2718	1106	14.6709	3.01766	1.59343	4.27158e-255	1.05167e-254	up	yes	CLCN3	protein_coding	chrNC_010456.5:20037628-20127160:-
gene6158	2253	30.299	5208	69.0831	0.438587	-1.18906	5.14439e-255	1.26552e-254	down	yes	PDCL3	protein_coding	chrNC_010445.4:53681798-53693034:-
gene15833	1096	14.7393	3342	44.331	0.332483	-1.58865	2.47293e-254	6.0734e-254	down	yes	ST5	protein_coding	chrNC_010451.4:653814-703383:+
gene16990	390	5.24483	1997	26.4898	0.197994	-2.33647	1.11355e-253	2.72809e-253	down	yes	GNG11	protein_coding	chrNC_010451.4:73721327-73726229:+
gene20626	4275	57.4914	1721	22.8287	2.51838	1.3325	1.34438e-253	3.29088e-253	up	yes	ACY1	protein_coding	chrNC_010455.5:34114119-34119684:+
gene14104	369	4.96242	1948	25.8399	0.192045	-2.38048	5.53656e-253	1.35196e-252	down	yes	AJUBA	protein_coding	chrNC_010449.5:76063009-76072884:+
gene24003	868	11.6731	2930	38.8659	0.300343	-1.73532	7.06013e-253	1.72259e-252	down	yes	TACC1	protein_coding	chrNC_010457.5:47749079-47861200:-
gene27290	716	9.62897	2645	35.0854	0.274444	-1.86542	3.61439e-252	8.7971e-252	down	yes	PLP2	protein_coding	chrNC_010461.5:43215372-43218318:+
gene3843	3367	45.2804	1162	15.4137	2.93767	1.55467	9.33315e-252	2.26791e-251	up	yes	GCDH	protein_coding	chrNC_010444.4:66131154-66138963:-
gene2979	3555	47.8087	1276	16.9259	2.82459	1.49804	1.07896e-251	2.61969e-251	up	yes	SERPING1	protein_coding	chrNC_010444.4:13324160-13338826:-
gene20561	5969	80.2728	2882	38.2292	2.09978	1.07024	3.4294e-250	8.27933e-250	up	yes	APEH	protein_coding	chrNC_010455.5:32205863-32214517:+
gene28025	3863	51.9507	1473	19.5391	2.65881	1.41078	4.98284e-250	1.20102e-249	up	yes	RENBP	protein_coding	chrNC_010461.5:124662957-124670522:-
gene18761	3058	41.1249	6363	84.404	0.487238	-1.0373	5.78078e-250	1.39223e-249	down	yes	METRNL	protein_coding	chrNC_010454.4:228228-241491:-
gene8161	1167	15.6941	3436	45.5779	0.344337	-1.53811	1.73587e-249	4.17724e-249	down	yes	PRKAB2	protein_coding	chrNC_010446.5:100378047-100394346:+
gene1723	1640	22.0552	4208	55.8183	0.395124	-1.33962	2.73712e-248	6.5814e-248	down	yes	JAK2	protein_coding	chrNC_010443.5:216849744-217002310:-
gene13669	4222	56.7787	1711	22.6961	2.50169	1.3229	9.84354e-248	2.36306e-247	up	yes	MCM3	protein_coding	chrNC_010449.5:46084648-46104425:-
gene10214	5019	67.4969	2239	29.6999	2.27263	1.18436	1.16868e-247	2.80332e-247	up	yes	ST3GAL2	protein_coding	chrNC_010448.4:13402336-13456495:-
gene6095	6139	82.559	3017	40.0199	2.06295	1.04471	2.16709e-247	5.18983e-247	up	yes	SNRNP200	protein_coding	chrNC_010445.4:46929066-46960420:+
gene27401	4045	54.3983	1600	21.2237	2.56309	1.35789	4.66447e-247	1.11617e-246	up	yes	EFNB1	protein_coding	chrNC_010461.5:54947339-54961403:+
gene15677	2207	29.6804	5074	67.3057	0.440979	-1.18122	6.25756e-246	1.49379e-245	down	yes	RAP1GDS1	protein_coding	chrNC_010450.4:121866803-122007492:-
gene25158	2271	30.5411	564	7.48135	4.08229	2.02938	1.70379e-245	4.06076e-245	up	yes	MCCC2	protein_coding	chrNC_010458.4:47917308-47996540:+
gene4638	2842	38.22	6013	79.7613	0.47918	-1.06136	2.75851e-245	6.56405e-245	down	yes	FER	protein_coding	chrNC_010444.4:113774120-114207307:+
gene10497	1282	17.2407	3596	47.7003	0.361438	-1.46818	8.67575e-244	2.05625e-243	down	yes	ADCY7	protein_coding	chrNC_010448.4:34521503-34586384:-
gene26099	2416	32.4911	646	8.56907	3.79167	1.92283	2.63942e-243	6.24085e-243	up	yes	ZNF217	protein_coding	chrNC_010459.5:54605939-54648868:-
gene7525	2324	31.2538	599	7.94562	3.93346	1.9758	1.27015e-242	2.9985e-242	up	yes	PENK	protein_coding	chrNC_010446.5:75525497-75530403:+
gene27882	2322	31.2269	5209	69.0964	0.451933	-1.14582	1.50855e-240	3.53891e-240	down	yes	FHL1	protein_coding	chrNC_010461.5:111309989-111367900:+
gene12690	1513	20.3473	3950	52.396	0.388336	-1.36462	7.82518e-240	1.83138e-239	down	yes	SLC2A1	protein_coding	chrNC_010448.4:168535398-168561170:+
gene26581	396	5.32552	1943	25.7735	0.206628	-2.2749	3.75083e-239	8.7646e-239	down	yes	TMEM229A	protein_coding	chrNC_010460.4:23531498-23533619:+
gene18690	1446	19.4462	3836	50.8838	0.382169	-1.38772	5.99259e-239	1.3981e-238	down	yes	LIG4	protein_coding	chrNC_010453.5:75537027-75547711:-
gene27592	1533	20.6162	3972	52.6878	0.39129	-1.35369	3.09904e-238	7.2133e-238	down	yes	CENPI	protein_coding	chrNC_010461.5:82776375-82826651:+
gene5398	1901	25.5652	4551	60.3682	0.423488	-1.23961	3.97447e-238	9.24374e-238	down	yes	HSPB1	protein_coding	chrNC_010445.4:10038074-10039441:-
gene769	2540	34.1586	5514	73.1422	0.467017	-1.09845	6.51291e-238	1.51358e-237	down	yes	MBD2	protein_coding	chrNC_010443.5:103683077-103768372:-
gene13233	4654	62.5883	2040	27.0602	2.31293	1.20972	1.41066e-237	3.27324e-237	up	yes	PPP1R10	protein_coding	chrNC_010449.5:23148834-23166933:-
gene9261	3098	41.6628	1050	13.9281	2.99129	1.58077	1.89153e-237	4.38561e-237	up	yes	HELB	protein_coding	chrNC_010447.5:30645378-30696488:+
gene26058	3180	42.7655	1101	14.6046	2.92823	1.55003	7.28801e-237	1.68714e-236	up	yes	B4GALT5	protein_coding	chrNC_010459.5:51257273-51334566:-
gene7734	3727	50.1218	1449	19.2207	2.6077	1.38278	3.85418e-234	8.88091e-234	up	yes	NIT1	protein_coding	chrNC_010446.5:89323598-89327057:-
gene10570	1701	22.8755	4212	55.8714	0.409432	-1.2883	4.26267e-234	9.8146e-234	down	yes	KCTD15	protein_coding	chrNC_010448.4:43528677-43545834:+
gene3133	2050	27.569	482	6.39364	4.31194	2.10834	7.72932e-233	1.77416e-232	up	yes	PRR5L	protein_coding	chrNC_010444.4:24646865-24812642:-
gene13827	5496	73.9118	2644	35.0722	2.10742	1.07548	2.34158e-232	5.36241e-232	up	yes	KIF7	protein_coding	chrNC_010449.5:55200591-55220237:-
gene18863	1777	23.8976	351	4.65595	5.1327	2.35972	9.59339e-232	2.1936e-231	up	yes	LGALS3BP	protein_coding	chrNC_010454.4:3212435-3222651:+
gene28112	1155	15.5328	3308	43.88	0.353983	-1.49825	3.11973e-231	7.12803e-231	down	yes	LOC110257935	protein_coding	chrNC_010462.3:6511350-6524989:-
gene4773	2666	35.8531	5648	74.9197	0.478554	-1.06325	3.46266e-231	7.90552e-231	down	yes	CHSY3	protein_coding	chrNC_010444.4:132536085-132803476:+
gene23079	5251	70.6169	2479	32.8835	2.14749	1.10265	3.50344e-231	7.9925e-231	up	yes	PLAC9	protein_coding	chrNC_010456.5:81890265-81901909:-
gene21195	3051	41.0307	6195	82.1755	0.499306	-1.002	4.74619e-230	1.07864e-229	down	yes	PDCD10	protein_coding	chrNC_010455.5:106517408-106558959:-
gene22644	1159	15.5866	3307	43.8667	0.355316	-1.49282	6.17842e-230	1.40306e-229	down	yes	SMTN	protein_coding	chrNC_010456.5:47879317-47902700:+
gene8896	2571	34.5755	5497	72.9167	0.474179	-1.0765	1.31598e-229	2.98619e-229	down	yes	RACGAP1	protein_coding	chrNC_010447.5:15894314-15943619:+
gene19542	955	12.8431	2955	39.1975	0.327651	-1.60977	1.99417e-229	4.51826e-229	down	yes	CUEDC1	protein_coding	chrNC_010454.4:34141649-34167731:-
gene9247	2880	38.7311	5937	78.7532	0.491803	-1.02385	1.82817e-228	4.13273e-228	down	yes	RASSF3	protein_coding	chrNC_010447.5:28949787-29113894:+
gene5302	5490	73.8311	2661	35.2977	2.09167	1.06466	2.39435e-228	5.40853e-228	up	yes	ZKSCAN1	protein_coding	chrNC_010445.4:7920640-7959462:+
gene25654	1640	22.0552	296	3.92638	5.61718	2.48984	1.18139e-227	2.66056e-227	up	yes	PYGB	protein_coding	chrNC_010459.5:30940457-30995688:+
gene12055	4844	65.1435	2216	29.3948	2.21616	1.14806	1.30303e-227	2.93228e-227	up	yes	PABPC4	protein_coding	chrNC_010448.4:95382295-95399452:-
gene11482	2282	30.689	5054	67.0404	0.457769	-1.12731	1.76418e-227	3.96407e-227	down	yes	DVL1	protein_coding	chrNC_010448.4:63617787-63628965:-
gene10744	4744	63.7987	2151	28.5326	2.23599	1.16091	6.32042e-227	1.41911e-226	up	yes	SUPT5H	protein_coding	chrNC_010448.4:48095001-48125120:+
gene7601	544	7.31587	2185	28.9836	0.252414	-1.98614	1.09573e-226	2.45653e-226	down	yes	DPT	protein_coding	chrNC_010446.5:82287657-82319380:+
gene19955	457	6.14587	2003	26.5694	0.231314	-2.11208	5.65972e-225	1.26316e-224	down	yes	CXCL16	protein_coding	chrNC_010454.4:52145100-52150267:+
gene12330	2899	38.9866	978	12.973	3.00521	1.58747	1.09096e-223	2.43303e-223	up	yes	IFI44	protein_coding	chrNC_010448.4:134634679-134649857:-
gene6395	1152	15.4924	3256	43.1902	0.358702	-1.47914	2.24154e-223	4.98784e-223	down	yes	MEIS1	protein_coding	chrNC_010445.4:75485024-75625855:-
gene28409	2066	27.7842	514	6.81811	4.07505	2.02682	3.65553e-223	8.12817e-223	up	yes	EGFL7	protein_coding	chrNW_018084833.1:1107088-1119033:-
gene18353	2900	39	983	13.0393	2.99096	1.58061	2.23731e-222	4.95994e-222	up	yes	FOXO1	protein_coding	chrNC_010453.5:15317222-15410059:-
gene11059	352	4.7338	1770	23.4787	0.201621	-2.31028	4.20407e-222	9.30626e-222	down	yes	RRAS	protein_coding	chrNC_010448.4:54680596-54684714:-
gene4887	2201	29.5997	4893	64.9047	0.456048	-1.13274	5.39915e-222	1.19429e-221	down	yes	KIF20A	protein_coding	chrNC_010444.4:140202316-140213144:+
gene23374	1594	21.4366	3962	52.5552	0.407887	-1.29376	9.18347e-222	2.02987e-221	down	yes	CUTC	protein_coding	chrNC_010456.5:110895063-110921544:+
gene15538	923	12.4128	2853	37.8445	0.327994	-1.60826	2.77199e-221	6.11801e-221	down	yes	SYNPO2	protein_coding	chrNC_010450.4:104677580-104844169:-
gene8097	933	12.5473	2870	38.07	0.329584	-1.60128	3.28207e-221	7.23844e-221	down	yes	PLEKHO1	protein_coding	chrNC_010446.5:98924115-98934610:-
gene20544	4243	57.0611	1840	24.4073	2.33787	1.2252	3.9263e-221	8.65287e-221	up	yes	USP19	protein_coding	chrNC_010455.5:31726668-31738135:-
gene7652	891	11.9824	2794	37.0619	0.323309	-1.62902	9.49667e-221	2.08827e-220	down	yes	NUF2	protein_coding	chrNC_010446.5:87162873-87194193:-
gene10693	188	2.52828	1386	18.385	0.137518	-2.8623	1.72864e-220	3.79281e-220	down	yes	PPP1R14A	protein_coding	chrNC_010448.4:47167105-47174299:-
gene787	4302	57.8545	1884	24.9909	2.31502	1.21103	3.86554e-220	8.46893e-220	up	yes	FECH	protein_coding	chrNC_010443.5:106861628-106898407:-
gene21025	4173	56.1197	1798	23.8501	2.35301	1.23451	4.21767e-220	9.23363e-220	up	yes	TRPC1	protein_coding	chrNC_010455.5:83436343-83498419:+
gene8330	1378	18.5317	3604	47.8064	0.387642	-1.36721	1.22983e-219	2.68259e-219	down	yes	CSF1	protein_coding	chrNC_010446.5:110178466-110198232:-
gene8873	593	7.97483	2243	29.753	0.268035	-1.89951	2.10565e-219	4.58629e-219	down	yes	LOC100127131	protein_coding	chrNC_010447.5:15153516-15269783:+
gene20545	1745	23.4673	4176	55.3939	0.423644	-1.23908	1.55823e-218	3.38654e-218	down	yes	LAMB2	protein_coding	chrNC_010455.5:31738282-31750623:-
gene11460	3491	46.948	1362	18.0667	2.59859	1.37773	3.04574e-218	6.60496e-218	up	yes	ISG15	protein_coding	chrNC_010448.4:63363201-63364211:+
gene25657	1547	20.8045	3863	51.242	0.406005	-1.30043	5.45927e-218	1.18303e-217	down	yes	NINL	protein_coding	chrNC_010459.5:31082958-31195041:-
gene4391	4629	62.2521	2120	28.1214	2.21369	1.14645	4.04204e-217	8.73379e-217	up	yes	DDX41	protein_coding	chrNC_010444.4:80433065-80445484:+
gene9552	1333	17.9266	3513	46.5993	0.384696	-1.37821	9.46037e-217	2.04118e-216	down	yes	RIMKLB	protein_coding	chrNC_010447.5:62676220-62715273:-
gene14966	3455	46.4638	1346	17.8544	2.60237	1.37983	1.65053e-216	3.55606e-216	up	yes	WDR19	protein_coding	chrNC_010450.4:30453969-30553699:+
gene13440	1904	25.6055	448	5.94264	4.30878	2.10728	2.86246e-216	6.15826e-216	up	yes	PPARD	protein_coding	chrNC_010449.5:31222533-31295221:+
gene24851	2632	35.3959	849	11.2618	3.143	1.65214	3.54944e-215	7.61974e-215	up	yes	FBXL7	protein_coding	chrNC_010458.4:4784452-5194193:+
gene17945	1464	19.6883	3711	49.2257	0.399959	-1.32207	7.46382e-215	1.59999e-214	down	yes	ZEB1	protein_coding	chrNC_010452.4:42013114-42216139:+
gene19837	4064	54.6538	1752	23.2399	2.35172	1.23372	3.42062e-214	7.31164e-214	up	yes	CLUH	protein_coding	chrNC_010454.4:48740117-48763496:-
gene20681	1082	14.551	90	1.19383	12.1885	3.60745	3.62778e-214	7.74891e-214	up	yes	ARHGEF3	protein_coding	chrNC_010455.5:38582618-38925599:-
gene10651	2238	30.0973	4890	64.8649	0.463999	-1.10781	4.08662e-214	8.72273e-214	down	yes	CAPNS1	protein_coding	chrNC_010448.4:45511410-45518610:+
gene22272	1780	23.9379	392	5.19981	4.60362	2.20277	9.33235e-214	1.98911e-213	up	yes	CBR4	protein_coding	chrNC_010456.5:20621960-20642351:+
gene6234	3882	52.2062	1636	21.7012	2.40568	1.26645	3.53751e-213	7.51306e-213	up	yes	POLR1A	protein_coding	chrNC_010445.4:58670377-58750441:+
gene27736	3777	50.7942	1570	20.8258	2.43901	1.28629	1.66971e-212	3.54365e-212	up	yes	LONRF3	protein_coding	chrNC_010461.5:97494305-97547813:+
gene22522	3911	52.5962	1659	22.0063	2.39005	1.25704	2.7176e-212	5.75941e-212	up	yes	ACADS	protein_coding	chrNC_010456.5:40642810-40656922:+
gene9232	1412	18.989	225	2.98458	6.36236	2.66956	7.31649e-212	1.54838e-211	up	yes	PPM1H	protein_coding	chrNC_010447.5:27299777-27572303:-
gene27880	2472	33.2442	5216	69.1893	0.480482	-1.05745	8.74666e-212	1.84974e-211	down	yes	SLC9A6	protein_coding	chrNC_010461.5:111176461-111233108:+
gene772	779	10.4762	2544	33.7457	0.310446	-1.68759	1.82921e-211	3.86567e-211	down	yes	C1H18orf54	protein_coding	chrNC_010443.5:103861579-103885057:+
gene22130	404	5.43311	1828	24.2481	0.224063	-2.15802	4.30591e-211	9.08681e-211	down	yes	SORBS3	protein_coding	chrNC_010456.5:6802944-6831152:+
gene23352	896	12.0497	27	0.35815	33.6442	5.07229	4.55539e-211	9.60649e-211	up	yes	SFRP5	protein_coding	chrNC_010456.5:109120382-109125655:-
gene22076	1153	15.5059	3180	42.1821	0.367594	-1.44382	1.50678e-210	3.17303e-210	down	yes	CKS2	protein_coding	chrNC_010456.5:904762-910292:+
gene20643	4930	66.3	2363	31.3447	2.11519	1.08079	2.64219e-210	5.56011e-210	up	yes	NISCH	protein_coding	chrNC_010455.5:34595788-34630306:+
gene3650	4084	54.9228	1787	23.7042	2.31701	1.21226	2.00837e-209	4.21741e-209	up	yes	MRPL34	protein_coding	chrNC_010444.4:60377904-60378967:-
gene24404	1705	22.9293	4037	53.55	0.428185	-1.22369	2.94332e-207	6.17637e-207	down	yes	SPATS2L	protein_coding	chrNC_010457.5:103879416-104060525:+
gene23404	1049	14.1073	89	1.18057	11.9495	3.57888	1.80908e-206	3.78825e-206	up	yes	KAZALD1	protein_coding	chrNC_010456.5:112142746-112146538:+
gene25186	386	5.19104	1768	23.4522	0.221346	-2.17563	2.70393e-206	5.65811e-206	down	yes	STC2	protein_coding	chrNC_010458.4:50989676-51001412:+
gene17875	866	11.6462	22	0.291826	39.9081	5.31861	5.41131e-206	1.13076e-205	up	yes	AQP3	protein_coding	chrNC_010452.4:33045374-33050285:+
gene9456	859	11.5521	16	0.212237	54.4301	5.76633	1.16603e-205	2.43486e-205	up	yes	MGP	protein_coding	chrNC_010447.5:57665272-57669360:+
gene17449	307	4.12862	1596	21.1706	0.195016	-2.35833	2.12636e-205	4.43088e-205	down	yes	ATF3	protein_coding	chrNC_010451.4:130772259-130829678:-
gene9711	4689	63.059	2221	29.4611	2.14041	1.09789	3.09908e-205	6.4443e-205	up	yes	USP18	protein_coding	chrNC_010447.5:70183321-70227990:+
gene22770	4563	61.3645	2138	28.3602	2.16376	1.11354	2.36748e-204	4.91273e-204	up	yes	COMT	protein_coding	chrNC_010456.5:51384729-51403997:+
gene23211	1434	19.2848	3590	47.6207	0.404968	-1.30412	1.2949e-203	2.67958e-203	down	yes	PRKG1	protein_coding	chrNC_010456.5:97558531-98793080:-
gene1762	676	9.09104	2315	30.708	0.296048	-1.7561	1.4665e-203	3.03258e-203	down	yes	TJP2	protein_coding	chrNC_010443.5:222474518-222612989:+
gene18436	3819	51.359	1639	21.741	2.36231	1.2402	4.71029e-203	9.72692e-203	up	yes	ZC3H13	protein_coding	chrNC_010453.5:21298855-21387557:+
gene15030	139	1.86931	1186	15.7321	0.118822	-3.07313	2.44019e-202	5.02864e-202	down	yes	OCIAD2	protein_coding	chrNC_010450.4:38771281-38793511:-
gene21154	597	8.02863	2162	28.6785	0.279953	-1.83675	2.9985e-202	6.17065e-202	down	yes	LXN	protein_coding	chrNC_010455.5:98435318-98441823:-
gene5552	1376	18.5048	3486	46.2411	0.400181	-1.32127	9.10812e-202	1.87179e-201	down	yes	KIF22	protein_coding	chrNC_010445.4:18023104-18041732:+
gene251	3506	47.1497	1441	19.1146	2.46669	1.30257	2.96325e-201	6.07715e-201	up	yes	PDE7B	protein_coding	chrNC_010443.5:27958261-28425754:-
gene25696	4659	62.6556	2221	29.4611	2.12672	1.08863	3.49567e-201	7.15924e-201	up	yes	VPS16	protein_coding	chrNC_010459.5:32803596-32825974:-
gene11720	2570	34.5621	5271	69.9188	0.494317	-1.01649	1.06681e-200	2.18186e-200	down	yes	CAPZB	protein_coding	chrNC_010448.4:77780682-77912653:-
gene18879	819	11.0141	2552	33.8518	0.325364	-1.61987	3.34714e-200	6.8316e-200	down	yes	BIRC5	protein_coding	chrNC_010454.4:3747276-3755214:-
gene23469	1159	15.5866	3123	41.426	0.376251	-1.41023	1.09811e-199	2.23668e-199	down	yes	GSTO1	protein_coding	chrNC_010456.5:115206434-115216624:+
gene17882	3834	51.5607	1666	22.0992	2.33315	1.22228	2.82064e-199	5.73346e-199	up	yes	B4GALT1	protein_coding	chrNC_010452.4:33317295-33381285:+
gene3158	2994	40.2642	1123	14.8964	2.70295	1.43453	3.74537e-199	7.60278e-199	up	yes	NAT10	protein_coding	chrNC_010444.4:26786172-26827060:-
gene10262	3492	46.9614	1441	19.1146	2.45684	1.2968	4.24263e-199	8.60633e-199	up	yes	NOB1	protein_coding	chrNC_010448.4:17233863-17245451:+
gene3209	1336	17.9669	216	2.8652	6.27074	2.64863	6.79814e-199	1.37809e-198	up	yes	FIBIN	protein_coding	chrNC_010444.4:33328250-33331752:-
gene15038	2477	33.3114	5120	67.9158	0.490481	-1.02773	1.56387e-198	3.16592e-198	down	yes	SGCB	protein_coding	chrNC_010450.4:39130371-39148756:-
gene6566	2252	30.2855	683	9.05987	3.34282	1.74107	2.01905e-198	4.0846e-198	up	yes	ZFP36L2	protein_coding	chrNC_010445.4:97200395-97203094:+
gene18814	2191	29.4652	649	8.60886	3.42266	1.77512	2.56081e-198	5.17711e-198	up	yes	SLC25A10	protein_coding	chrNC_010454.4:1191242-1197439:-
gene24903	3293	44.2852	1316	17.4565	2.53689	1.34306	3.41612e-198	6.90158e-198	up	yes	AMACR	protein_coding	chrNC_010458.4:20005741-20023339:-
gene9161	830	11.1621	11	0.145913	76.4982	6.25735	1.81639e-197	3.66221e-197	up	yes	RDH16	protein_coding	chrNC_010447.5:22251751-22266801:-
gene17851	914	12.2917	54	0.7163	17.16	4.10098	3.27911e-197	6.60687e-197	up	yes	CCL19	protein_coding	chrNC_010452.4:32110366-32112529:+
gene12320	4984	67.0263	2473	32.8039	2.04324	1.03086	6.26352e-197	1.26115e-196	up	yes	ADGRL2	protein_coding	chrNC_010448.4:131727082-132366106:-
gene23636	2497	33.5804	5135	68.1148	0.492997	-1.02035	8.73293e-197	1.75599e-196	down	yes	ZRANB1	protein_coding	chrNC_010456.5:134253927-134327835:+
gene8138	3779	50.8211	1643	21.7941	2.33187	1.22149	3.00047e-196	6.02107e-196	up	yes	LIX1L	protein_coding	chrNC_010446.5:99384293-99403554:+
gene623	3712	49.92	1603	21.2635	2.34769	1.23124	3.28515e-195	6.57466e-195	up	yes	NT5DC1	protein_coding	chrNC_010443.5:81745918-81880691:+
gene891	3883	52.2197	1718	22.7889	2.29145	1.19626	4.07031e-195	8.13511e-195	up	yes	FAM214A	protein_coding	chrNC_010443.5:118993862-119124472:+
gene6927	3230	43.438	1289	17.0983	2.54048	1.3451	6.87561e-195	1.37235e-194	up	yes	MFSD3	protein_coding	chrNC_010446.5:293707-295955:-
gene9727	1064	14.309	2936	38.9455	0.36741	-1.44454	1.0702e-194	2.13466e-194	down	yes	ZCRB1	protein_coding	chrNC_010447.5:73538982-73556240:-
gene12662	819	11.0141	2520	33.4273	0.329495	-1.60167	1.48196e-194	2.954e-194	down	yes	PTPRF	protein_coding	chrNC_010448.4:167656674-167743750:-
gene24622	1269	17.0659	3268	43.3494	0.393682	-1.3449	1.88263e-194	3.74764e-194	down	yes	KCNE4	protein_coding	chrNC_010457.5:124910708-124915787:+
gene22799	1982	26.6545	547	7.25585	3.67352	1.87716	1.07007e-193	2.12587e-193	up	yes	MTR	protein_coding	chrNC_010456.5:54546978-54652780:-
gene20421	1304	17.5366	212	2.81214	6.23602	2.64063	1.49865e-193	2.97336e-193	up	yes	FAM198A	protein_coding	chrNC_010455.5:26415637-26473649:+
gene11723	2248	30.2317	4739	62.8619	0.480923	-1.05612	3.22742e-192	6.38631e-192	down	yes	NBL1	protein_coding	chrNC_010448.4:78046084-78071609:+
gene6834	1637	22.0148	371	4.92124	4.47343	2.16138	3.2616e-192	6.44966e-192	up	yes	TRIB2	protein_coding	chrNC_010445.4:124170677-124196253:-
gene341	4570	61.4587	2206	29.2622	2.10028	1.07058	3.83819e-192	7.58482e-192	up	yes	RNF217	protein_coding	chrNC_010443.5:37784359-37912122:-
gene22430	2600	34.9655	908	12.0444	2.90304	1.53757	8.68681e-192	1.7155e-191	up	yes	ACAD10	protein_coding	chrNC_010456.5:32841863-32890983:+
gene2993	5064	68.1021	2560	33.9579	2.00549	1.00395	1.28885e-191	2.5419e-191	up	yes	SSRP1	protein_coding	chrNC_010444.4:13619666-13629233:+
gene15643	2539	34.1452	873	11.5802	2.94859	1.56002	2.61115e-191	5.14298e-191	up	yes	MANBA	protein_coding	chrNC_010450.4:118251122-118361903:+
gene20640	1104	14.8469	134	1.77748	8.35276	3.06225	1.91164e-190	3.74544e-190	up	yes	PHF7	protein_coding	chrNC_010455.5:34553818-34565647:+
gene27232	3242	43.5993	1315	17.4432	2.4995	1.32164	1.93876e-190	3.79607e-190	up	yes	RP2	protein_coding	chrNC_010461.5:41488866-41534810:+
gene26869	2287	30.7562	4781	63.4191	0.484968	-1.04404	2.52117e-190	4.93319e-190	down	yes	YAE1D1	protein_coding	chrNC_010460.4:54656517-54663207:-
gene26776	365	4.90862	1648	21.8604	0.224544	-2.15493	3.56917e-190	6.97467e-190	down	yes	DFNA5	protein_coding	chrNC_010460.4:47524637-47583748:+
gene9664	2226	29.9359	4689	62.1987	0.481294	-1.05501	6.90589e-190	1.34863e-189	down	yes	TULP3	protein_coding	chrNC_010447.5:67201680-67238348:-
gene12520	2727	36.6735	995	13.1985	2.77861	1.47436	4.38436e-189	8.53971e-189	up	yes	CPT2	protein_coding	chrNC_010448.4:159038129-159061327:-
gene10106	2678	36.0145	965	12.8005	2.81351	1.49237	4.56245e-189	8.88079e-189	up	yes	USP10	protein_coding	chrNC_010448.4:3977235-4043539:-
gene8566	1710	22.9966	416	5.51816	4.16743	2.05916	7.51595e-189	1.46107e-188	up	yes	ARSA	protein_coding	chrNC_010447.5:107103-110330:+
gene1352	2470	33.2173	5032	66.7485	0.497648	-1.0068	1.0128e-188	1.96756e-188	down	yes	UACA	protein_coding	chrNC_010443.5:168353655-168453175:-
gene17009	1101	14.8066	136	1.80401	8.20756	3.03695	1.80848e-188	3.50876e-188	up	yes	DYNC1I1	protein_coding	chrNC_010451.4:75414663-75760527:+
gene8954	2004	26.9504	574	7.614	3.53958	1.82358	2.38971e-188	4.63342e-188	up	yes	KRT8	protein_coding	chrNC_010447.5:18172423-18180277:-
gene1344	1066	14.3359	2897	38.4282	0.373056	-1.42253	8.37147e-188	1.61789e-187	down	yes	KIF23	protein_coding	chrNC_010443.5:167239973-167281250:+
gene28886	121	1.62724	1078	14.2995	0.113797	-3.13546	1.63725e-187	3.16215e-187	down	yes	LOC110258364	protein_coding	chrNW_018084979.1:3510997-3512789:+
gene24000	2128	28.618	4526	60.0365	0.476676	-1.06892	2.82439e-187	5.45143e-187	down	yes	PLEKHA2	protein_coding	chrNC_010457.5:47626107-47697238:-
gene16458	1990	26.7621	4306	57.1183	0.468538	-1.09376	5.62755e-185	1.0806e-184	down	yes	PDGFD	protein_coding	chrNC_010451.4:34388636-34621227:-
gene21151	1795	24.1397	4004	53.1123	0.454502	-1.13764	2.7301e-183	5.23221e-183	down	yes	RSRC1	protein_coding	chrNC_010455.5:97893815-98338108:+
gene23402	1061	14.2686	2859	37.9241	0.376242	-1.41027	5.48349e-183	1.04821e-182	down	yes	SFXN3	protein_coding	chrNC_010456.5:112111483-112119166:+
gene22162	1270	17.0793	3192	42.3413	0.403373	-1.30981	1.7539e-182	3.34844e-182	down	yes	KCTD9	protein_coding	chrNC_010456.5:9453086-9517686:-
gene7423	1564	21.0331	3645	48.3502	0.435016	-1.20086	6.66787e-182	1.26893e-181	down	yes	ELOC	protein_coding	chrNC_010446.5:61971103-61989392:+
gene21666	2258	30.3662	738	9.78943	3.10194	1.63317	6.69981e-182	1.27419e-181	up	yes	NIT2	protein_coding	chrNC_010455.5:158630997-158653164:-
gene9890	1427	19.1907	3432	45.5248	0.421544	-1.24625	1.37509e-181	2.61187e-181	down	yes	CDK17	protein_coding	chrNC_010447.5:87180132-87282391:+
gene20456	3192	42.9269	1320	17.5096	2.45163	1.29374	1.63391e-181	3.1015e-181	up	yes	LIMD1	protein_coding	chrNC_010455.5:28730192-28811584:+
gene20828	2379	31.9935	4837	64.1619	0.498637	-1.00394	1.2049e-180	2.27989e-180	down	yes	FANCD2	protein_coding	chrNC_010455.5:66241951-66308601:+
gene8153	1479	19.89	3505	46.4932	0.427805	-1.22497	1.63805e-180	3.09752e-180	down	yes	ACP6	protein_coding	chrNC_010446.5:99930343-99948056:+
gene16838	3282	44.1373	1384	18.3585	2.40419	1.26555	2.36275e-180	4.46509e-180	up	yes	ACAD8	protein_coding	chrNC_010451.4:60807405-60828379:+
gene8322	2761	37.1307	1050	13.9281	2.66589	1.41462	4.98608e-180	9.40476e-180	up	yes	RBM15	protein_coding	chrNC_010446.5:109767464-109791555:-
gene4472	851	11.4445	56	0.742829	15.4066	3.94548	1.4843e-179	2.79615e-179	up	yes	IQGAP2	protein_coding	chrNC_010444.4:85294423-85633645:+
gene75	3037	40.8424	1228	16.2892	2.50733	1.32615	1.85753e-179	3.49706e-179	up	yes	IGF2R	protein_coding	chrNC_010443.5:7369485-7472480:-
gene26338	461	6.19966	1786	23.691	0.261689	-1.93408	2.4119e-179	4.53786e-179	down	yes	ZYX	protein_coding	chrNC_010460.4:6861072-6870256:-
gene11433	2578	34.6697	945	12.5352	2.76578	1.46768	1.12932e-177	2.11543e-177	up	yes	ZNF8	protein_coding	chrNC_010448.4:62894617-62914448:+
gene744	2830	38.0586	1103	14.6311	2.60122	1.37919	1.35265e-177	2.529e-177	up	yes	ACAA2	protein_coding	chrNC_010443.5:99284467-99310759:-
gene28035	1942	26.1166	4175	55.3806	0.471583	-1.08441	5.85599e-177	1.0935e-176	down	yes	EMD	protein_coding	chrNC_010461.5:124883047-124885429:-
gene20645	2372	31.8993	823	10.9169	2.922	1.54696	1.0577e-176	1.97259e-176	up	yes	NT5DC2	protein_coding	chrNC_010455.5:34659249-34679530:-
gene10600	107	1.43897	996	13.2118	0.108916	-3.19872	1.59998e-176	2.98207e-176	down	yes	FXYD5	protein_coding	chrNC_010448.4:44682245-44696088:+
gene10393	504	6.77794	1853	24.5797	0.275753	-1.85855	2.05062e-176	3.81961e-176	down	yes	LOC100523672	protein_coding	chrNC_010448.4:27808658-27818256:+
gene18849	1781	23.9514	486	6.4467	3.7153	1.89348	2.78418e-176	5.18274e-176	up	yes	GAA	protein_coding	chrNC_010454.4:2315807-2339867:-
gene19722	1414	19.0159	3373	44.7422	0.42501	-1.23443	6.97763e-176	1.29726e-175	down	yes	TNFAIP1	protein_coding	chrNC_010454.4:44616840-44626330:+
gene6288	174	2.34	1160	15.3872	0.152075	-2.71715	2.64251e-175	4.89156e-175	down	yes	LOXL3	protein_coding	chrNC_010445.4:68498114-68516829:+
gene17391	2664	35.8262	1008	13.3709	2.67941	1.42192	4.09653e-175	7.5784e-175	up	yes	LAMC2	protein_coding	chrNC_010451.4:124427545-124499672:+
gene11778	451	6.06518	1739	23.0675	0.262932	-1.92724	7.23013e-174	1.33258e-173	down	yes	TCEA3	protein_coding	chrNC_010448.4:81267351-81304902:-
gene26839	1778	23.9111	491	6.51302	3.67127	1.87628	7.28554e-174	1.34197e-173	up	yes	POLM	protein_coding	chrNC_010460.4:51077845-51091354:+
gene1069	2881	38.7445	1151	15.2678	2.53766	1.3435	9.67489e-174	1.77988e-173	up	yes	IVD	protein_coding	chrNC_010443.5:130896488-130910582:-
gene2755	3631	48.8307	1651	21.9002	2.22969	1.15684	3.28196e-173	6.03034e-173	up	yes	PLA2G16	protein_coding	chrNC_010444.4:8410540-8444604:+
gene19003	4375	58.8362	2174	28.8377	2.04025	1.02875	1.52407e-172	2.79176e-172	up	yes	TTYH2	protein_coding	chrNC_010454.4:6838420-6881562:-
gene20845	3497	47.0287	1567	20.786	2.26252	1.17793	1.03117e-171	1.88541e-171	up	yes	VGLL4	protein_coding	chrNC_010455.5:67698082-67873119:-
gene6196	1857	24.9735	4010	53.1919	0.469498	-1.09081	1.17263e-171	2.14274e-171	down	yes	ANKRD39	protein_coding	chrNC_010445.4:56762366-56774253:+
gene1078	1157	15.5597	2938	38.972	0.399252	-1.32463	4.9375e-171	9.00023e-171	down	yes	BUB1B	protein_coding	chrNC_010443.5:131093026-131143840:-
gene12417	1386	18.6393	296	3.92638	4.7472	2.24708	5.5173e-171	1.0051e-170	up	yes	ROR1	protein_coding	chrNC_010448.4:148314575-148834659:-
gene7225	152	2.04414	1088	14.4321	0.141638	-2.81972	6.12729e-171	1.11554e-170	down	yes	CTHRC1	protein_coding	chrNC_010446.5:33759541-33771625:-
gene5470	4375	58.8362	2183	28.9571	2.03184	1.02279	6.37242e-171	1.15946e-170	up	yes	CRCP	protein_coding	chrNC_010445.4:16528949-16622005:-
gene17874	3318	44.6214	1451	19.2472	2.31833	1.21308	1.03237e-170	1.87724e-170	up	yes	NOL6	protein_coding	chrNC_010452.4:33022035-33035201:+
gene2115	2491	33.4997	919	12.1904	2.74805	1.45841	3.78803e-170	6.87972e-170	up	yes	LOC102164650	protein_coding	chrNC_010443.5:260868776-260897737:+
gene13261	908	12.211	2527	33.5202	0.364289	-1.45684	5.55819e-170	1.00885e-169	down	yes	LOC100153163	protein_coding	chrNC_010449.5:23596900-23610431:+
gene19063	4151	55.8238	2033	26.9674	2.07005	1.04967	3.04693e-169	5.51028e-169	up	yes	HELZ	protein_coding	chrNC_010454.4:13488551-13654979:-
gene27732	2213	29.7611	755	10.0149	2.97167	1.57127	9.54306e-169	1.72375e-168	up	yes	DOCK11	protein_coding	chrNC_010461.5:97068488-97267528:+
gene7596	688	9.25242	2144	28.4398	0.325334	-1.62001	1.5212e-168	2.7444e-168	down	yes	ATP1B1	protein_coding	chrNC_010446.5:81912543-81937015:-
gene26997	3505	47.1362	1590	21.091	2.23489	1.16021	4.87256e-168	8.77465e-168	up	yes	CA5B	protein_coding	chrNC_010461.5:12295393-12332283:+
gene22167	3035	40.8155	1280	16.979	2.40389	1.26537	6.73746e-167	1.20892e-166	up	yes	PPP2R2A	protein_coding	chrNC_010456.5:10195388-10283741:+
gene23428	752	10.1131	2243	29.753	0.339903	-1.55681	1.80782e-166	3.23605e-166	down	yes	NFKB2	protein_coding	chrNC_010456.5:113406412-113414177:+
gene24231	2155	28.9811	730	9.68331	2.99289	1.58154	6.38137e-166	1.14023e-165	up	yes	ITGA6	protein_coding	chrNC_010457.5:78504108-78591779:+
gene15315	741	9.96518	2219	29.4346	0.338553	-1.56255	1.38225e-165	2.46687e-165	down	yes	STBD1	protein_coding	chrNC_010450.4:71982987-71987880:+
gene14949	1508	20.28	3441	45.6442	0.444306	-1.17037	4.87384e-165	8.67746e-165	down	yes	RELL1	protein_coding	chrNC_010450.4:29118511-29190591:-
gene1342	4123	55.4473	2037	27.0204	2.05205	1.03707	7.33202e-165	1.30463e-164	up	yes	GLCE	protein_coding	chrNC_010443.5:167007930-167122196:+
gene2974	4189	56.3349	2084	27.6439	2.03788	1.02707	7.40901e-165	1.31754e-164	up	yes	ZDHHC5	protein_coding	chrNC_010444.4:13250967-13276517:-
gene12195	2702	36.3373	1073	14.2331	2.553	1.3522	1.1294e-164	2.00721e-164	up	yes	NPC1	protein_coding	chrNC_010448.4:108403126-108450486:-
gene23059	2045	27.5017	670	8.88742	3.09446	1.62969	1.94826e-164	3.46045e-164	up	yes	ZNF503	protein_coding	chrNC_010456.5:77924391-77928754:-
gene19272	1553	20.8852	3502	46.4534	0.449595	-1.1533	4.42715e-164	7.85405e-164	down	yes	P3H4	protein_coding	chrNC_010454.4:20881807-20891482:+
gene25942	1451	19.5135	345	4.57636	4.26397	2.0922	8.01621e-164	1.41959e-163	up	yes	FITM2	protein_coding	chrNC_010459.5:46742662-46745898:-
gene25584	670	9.01035	2085	27.6571	0.325788	-1.618	1.12986e-163	1.9985e-163	down	yes	FLRT3	protein_coding	chrNC_010459.5:22940491-22955277:-
gene9115	3779	50.8211	1801	23.8899	2.1273	1.08902	1.14609e-163	2.02601e-163	up	yes	MMP19	protein_coding	chrNC_010447.5:21279514-21285943:-
gene24420	738	9.92483	2198	29.1561	0.340404	-1.55468	7.53943e-163	1.3265e-162	down	yes	CASP8	protein_coding	chrNC_010457.5:104923659-104948470:+
gene1311	1781	23.9514	3831	50.8175	0.471322	-1.08522	9.70835e-163	1.70509e-162	down	yes	MAP2K1	protein_coding	chrNC_010443.5:164381892-164469313:+
gene1467	339	4.55897	1462	19.3932	0.235081	-2.08877	1.72771e-162	3.02905e-162	down	yes	CDKN3	protein_coding	chrNC_010443.5:183792606-183809178:+
gene25666	1671	22.4721	3666	48.6288	0.462115	-1.11368	2.12029e-162	3.71514e-162	down	yes	RNF24	protein_coding	chrNC_010459.5:31705355-31799490:+
gene3564	2590	34.8311	1011	13.4107	2.59725	1.37699	2.56198e-162	4.48644e-162	up	yes	ATP13A1	protein_coding	chrNC_010444.4:58267489-58285383:+
gene3358	3915	52.65	1906	25.2827	2.08245	1.05828	7.38997e-162	1.29259e-161	up	yes	JMJD4	protein_coding	chrNC_010444.4:50804797-50812180:-
gene8308	3481	46.8135	1604	21.2768	2.20022	1.13765	8.49302e-162	1.48465e-161	up	yes	CEPT1	protein_coding	chrNC_010446.5:109142712-109185497:-
gene136	331	4.45138	1442	19.1279	0.232717	-2.10335	1.05695e-161	1.84655e-161	down	yes	RGS17	protein_coding	chrNC_010443.5:13340253-13442058:+
gene19363	672	9.03725	11	0.145913	61.9359	5.9527	3.49075e-161	6.08075e-161	up	yes	PPP1R1B	protein_coding	chrNC_010454.4:22681244-22690978:-
gene14856	782	10.5166	2263	30.0183	0.350339	-1.51318	3.72394e-161	6.48317e-161	down	yes	CPEB2	protein_coding	chrNC_010450.4:10401350-10472141:+
gene26492	1879	25.2693	585	7.75991	3.25639	1.70327	6.26268e-161	1.08966e-160	up	yes	PLXNA4	protein_coding	chrNC_010460.4:16475250-16977821:+
gene8795	2935	39.4707	1243	16.4882	2.39388	1.25935	2.77707e-160	4.80947e-160	up	yes	C1QTNF6	protein_coding	chrNC_010447.5:10601869-10606886:+
gene2731	718	9.65587	2147	28.4795	0.339046	-1.56045	5.71446e-160	9.87939e-160	down	yes	BAD	protein_coding	chrNC_010444.4:7831192-7842864:+
gene12197	2400	32.2759	901	11.9516	2.70055	1.43325	7.73471e-160	1.33643e-159	up	yes	LAMA3	protein_coding	chrNC_010448.4:108548818-108805700:+
gene6283	1417	19.0562	3266	43.3229	0.439865	-1.18487	8.25561e-160	1.42561e-159	down	yes	HK2	protein_coding	chrNC_010445.4:68155656-68231187:-
gene16787	3105	41.7569	1363	18.0799	2.30957	1.20763	9.18057e-159	1.57985e-158	up	yes	CDON	protein_coding	chrNC_010451.4:53079543-53178881:-
gene9392	2045	27.5017	689	9.13945	3.00912	1.58934	1.13653e-158	1.95356e-158	up	yes	ETFRF1	protein_coding	chrNC_010447.5:48549475-48555589:-
gene21742	3457	46.4907	1603	21.2635	2.18641	1.12856	1.15149e-158	1.97813e-158	up	yes	RIOX2	protein_coding	chrNC_010455.5:162330541-162354420:+
gene2739	827	11.1217	2323	30.8142	0.360929	-1.47021	1.52379e-158	2.61319e-158	down	yes	NUDT22	protein_coding	chrNC_010444.4:7881056-7883825:-
gene10199	2322	31.2269	859	11.3945	2.74053	1.45446	4.14666e-158	7.10307e-158	up	yes	RFWD3	protein_coding	chrNC_010448.4:12952243-12994053:+
gene29038	3288	44.218	1491	19.7778	2.23573	1.16075	7.05972e-158	1.20861e-157	up	yes	TFCP2	protein_coding	chrNW_018085018.1:226577-290232:+
gene4873	3380	45.4552	1555	20.6268	2.2037	1.13993	1.16132e-157	1.98587e-157	up	yes	HNRNPA0	protein_coding	chrNC_010444.4:139779865-139783016:-
gene11672	2742	36.8752	1129	14.976	2.46229	1.3	2.2687e-157	3.87729e-157	up	yes	RSC1A1	protein_coding	chrNC_010448.4:74846976-74865376:+
gene5939	3196	42.9807	1432	18.9952	2.26271	1.17805	3.90758e-157	6.67055e-157	up	yes	GNPTG	protein_coding	chrNC_010445.4:40512093-40534217:-
gene16793	1309	17.6038	3082	40.8821	0.430599	-1.21558	4.42121e-157	7.54304e-157	down	yes	DCPS	protein_coding	chrNC_010451.4:53400750-53437161:+
gene24453	2920	39.269	1252	16.6075	2.36453	1.24155	5.3039e-156	8.99246e-156	up	yes	PARD3B	protein_coding	chrNC_010457.5:107882457-108913487:+
gene24527	3978	53.4973	1988	26.3704	2.02868	1.02054	4.82975e-155	8.16536e-155	up	yes	ATIC	protein_coding	chrNC_010457.5:117617584-117649063:+
gene24185	2178	29.2904	782	10.3731	2.82369	1.49758	6.15602e-155	1.03958e-154	up	yes	STK39	protein_coding	chrNC_010457.5:74441019-74757851:-
gene25064	2230	29.9897	814	10.7976	2.77745	1.47376	6.64453e-155	1.12144e-154	up	yes	MAP3K1	protein_coding	chrNC_010458.4:35872301-35947097:+
gene2515	224	3.01242	1184	15.7055	0.191806	-2.38228	1.0274e-154	1.73206e-154	down	yes	PHLDA2	protein_coding	chrNC_010444.4:2057679-2058675:-
gene3295	1501	20.1859	3356	44.5167	0.453445	-1.141	1.11625e-154	1.88077e-154	down	yes	BTBD10	protein_coding	chrNC_010444.4:45793510-45894594:+
gene22390	1200	16.1379	244	3.23661	4.98606	2.3179	6.63677e-154	1.11635e-153	up	yes	MLXIP	protein_coding	chrNC_010456.5:30575098-30646275:-
gene26227	1706	22.9428	3641	48.2972	0.475033	-1.0739	3.45592e-152	5.79347e-152	down	yes	DNAJC5	protein_coding	chrNC_010459.5:62754630-62780470:+
gene9428	1807	24.3011	3786	50.2206	0.483886	-1.04726	6.78258e-152	1.13575e-151	down	yes	AEBP2	protein_coding	chrNC_010447.5:53617362-53691487:-
gene22572	3900	52.4483	1952	25.8929	2.02559	1.01834	1.65005e-151	2.75839e-151	up	yes	GRK3	protein_coding	chrNC_010456.5:43305255-43445626:+
gene3110	210	2.82414	1136	15.0688	0.187416	-2.41568	6.28836e-151	1.04946e-150	down	yes	C2H11orf96	protein_coding	chrNC_010444.4:18392294-18393911:-
gene3105	3530	47.4724	1694	22.4706	2.11265	1.07905	8.8873e-151	1.48236e-150	up	yes	EXT2	protein_coding	chrNC_010444.4:18099790-18239229:-
gene204	3866	51.9911	1934	25.6541	2.02661	1.01907	2.2135e-150	3.68791e-150	up	yes	PEX3	protein_coding	chrNC_010443.5:21750194-21801625:-
gene13681	3522	47.3649	1694	22.4706	2.10786	1.07578	1.04114e-149	1.73271e-149	up	yes	GSTA4	protein_coding	chrNC_010449.5:46635903-46656491:-
gene6248	3876	52.1256	1947	25.8266	2.01829	1.01313	2.43681e-149	4.04639e-149	up	yes	MAT2A	protein_coding	chrNC_010445.4:59220203-59225097:-
gene11497	434	5.83656	1579	20.9451	0.278659	-1.84343	5.45166e-149	9.04259e-149	down	yes	MMP23B	protein_coding	chrNC_010448.4:63801668-63804275:+
gene22905	1255	16.8776	2943	39.0383	0.432334	-1.20978	5.66722e-149	9.39492e-149	down	yes	CDK1	protein_coding	chrNC_010456.5:64233945-64255290:+
gene5386	732	9.84414	2105	27.9224	0.352553	-1.50409	9.83394e-149	1.62843e-148	down	yes	ORAI2	protein_coding	chrNC_010445.4:9782626-9796761:+
gene625	2817	37.8838	1219	16.1698	2.34287	1.22828	4.41175e-148	7.29339e-148	up	yes	TSPYL4	protein_coding	chrNC_010443.5:81888946-81893643:-
gene22131	223	2.99897	1149	15.2413	0.196766	-2.34545	1.68578e-147	2.78225e-147	down	yes	PDLIM2	protein_coding	chrNC_010456.5:6834116-6848536:+
gene2055	3523	47.3783	1708	22.6563	2.09118	1.06431	3.40234e-147	5.61221e-147	up	yes	INIP	protein_coding	chrNC_010443.5:253375193-253393886:-
gene306	1659	22.3107	503	6.6722	3.34383	1.7415	9.19956e-147	1.5133e-146	up	yes	ARHGAP18	protein_coding	chrNC_010443.5:33527734-33717977:+
gene23757	2261	30.4066	864	11.4608	2.65309	1.40768	1.02403e-146	1.68358e-146	up	yes	ACVR2A	protein_coding	chrNC_010457.5:4177333-4259056:-
gene18457	2659	35.759	1122	14.8831	2.40265	1.26463	2.43129e-146	3.9928e-146	up	yes	TSC22D1	protein_coding	chrNC_010453.5:22518792-22634411:+
gene19058	1871	25.1617	3834	50.8573	0.494752	-1.01522	3.03724e-146	4.97971e-146	down	yes	PRKCA	protein_coding	chrNC_010454.4:12882287-13268647:+
gene8778	1049	14.1073	192	2.54684	5.53911	2.46965	5.0345e-145	8.21368e-145	up	yes	GCAT	protein_coding	chrNC_010447.5:10027133-10038494:-
gene8376	725	9.75001	2069	27.4449	0.355258	-1.49306	1.15886e-144	1.88447e-144	down	yes	FAM102B	protein_coding	chrNC_010446.5:111391672-111467230:-
gene15016	1474	19.8228	3241	42.9913	0.461089	-1.11688	1.81692e-144	2.95136e-144	down	yes	COMMD8	protein_coding	chrNC_010450.4:37344708-37380324:-
gene26109	1368	18.3973	3081	40.8689	0.450153	-1.15151	3.03389e-144	4.91747e-144	down	yes	PFDN4	protein_coding	chrNC_010459.5:55155772-55168024:+
gene2631	432	5.80966	1548	20.5339	0.28293	-1.82148	9.07285e-144	1.46659e-143	down	yes	CD248	protein_coding	chrNC_010444.4:6070885-6073518:+
gene6619	3739	50.2831	1882	24.9644	2.0142	1.0102	1.86785e-143	3.01439e-143	up	yes	NDUFAF7	protein_coding	chrNC_010445.4:102938968-102964204:-
gene12415	1548	20.8179	452	5.99569	3.47215	1.79583	5.87852e-143	9.45627e-143	up	yes	CACHD1	protein_coding	chrNC_010448.4:147774934-148010916:-
gene20817	1581	21.2617	471	6.24773	3.40312	1.76686	9.23927e-143	1.48384e-142	up	yes	TTLL3	protein_coding	chrNC_010455.5:66094069-66123984:+
gene18669	3027	40.708	1386	18.385	2.21419	1.14678	9.40897e-143	1.51028e-142	up	yes	KDELC1	protein_coding	chrNC_010453.5:71095116-71110490:-
gene2280	1704	22.9159	544	7.21606	3.17568	1.66706	8.22128e-142	1.31469e-141	up	yes	LCN2	protein_coding	chrNC_010443.5:268609975-268614651:+
gene8735	2828	38.0318	1257	16.6739	2.28092	1.18962	2.01812e-141	3.22033e-141	up	yes	MIEF1	protein_coding	chrNC_010447.5:8748171-8762087:-
gene27354	1017	13.6769	185	2.45399	5.57333	2.47854	3.12184e-141	4.97888e-141	up	yes	APEX2	protein_coding	chrNC_010461.5:47862682-47870579:+
gene18654	1975	26.5604	708	9.39149	2.82813	1.49985	5.38219e-141	8.57466e-141	up	yes	PCCA	protein_coding	chrNC_010453.5:68920923-69286431:+
gene11676	1155	15.5328	2734	36.266	0.428301	-1.2233	5.94181e-141	9.46116e-141	down	yes	FBLIM1	protein_coding	chrNC_010448.4:74929830-74964166:+
gene6858	328	4.41104	1334	17.6953	0.249278	-2.00417	7.85512e-141	1.25011e-140	down	yes	CYS1	protein_coding	chrNC_010445.4:126398302-126411951:+
gene7421	1630	21.9207	3437	45.5912	0.48081	-1.05646	4.86916e-140	7.72433e-140	down	yes	LY96	protein_coding	chrNC_010446.5:61919806-61950712:-
gene21534	3665	49.288	1849	24.5266	2.00957	1.00689	6.63011e-140	1.05067e-139	up	yes	ADPRH	protein_coding	chrNC_010455.5:140638526-140681631:-
gene24825	510	6.85863	1669	22.139	0.309799	-1.6906	8.76875e-140	1.38884e-139	down	yes	BOK	protein_coding	chrNC_010457.5:140171134-140184126:+
gene27396	2336	31.4152	941	12.4822	2.5168	1.33159	2.2908e-139	3.62061e-139	up	yes	OPHN1	protein_coding	chrNC_010461.5:54056504-54617045:-
gene12979	3096	41.6359	1452	19.2605	2.16172	1.11218	4.86036e-139	7.67772e-139	up	yes	HIST1H2BD	protein_coding	chrNC_010449.5:20821090-20829491:+
gene20270	672	9.03725	1946	25.8133	0.3501	-1.51416	5.38612e-139	8.49924e-139	down	yes	ZNF385D	protein_coding	chrNC_010455.5:8234734-9214628:-
gene19630	687	9.23897	54	0.7163	12.8982	3.6891	5.74996e-139	9.06858e-139	up	yes	LOC110256045	protein_coding	chrNC_010454.4:39351029-39355689:-
gene10076	2381	32.0204	972	12.8934	2.48347	1.31236	6.60288e-139	1.04083e-138	up	yes	ZCCHC14	protein_coding	chrNC_010448.4:1849974-1917601:+
gene23712	343	4.61276	1353	17.9473	0.257017	-1.96006	9.39308e-139	1.47831e-138	down	yes	SPRN	protein_coding	chrNC_010456.5:141384454-141389288:-
gene7147	1076	14.4704	218	2.89173	5.00405	2.3231	1.41809e-138	2.23065e-138	up	yes	ENPP2	protein_coding	chrNC_010446.5:19319815-19433492:+
gene20917	1216	16.3531	287	3.807	4.29554	2.10284	1.69753e-138	2.6688e-138	up	yes	MGLL	protein_coding	chrNC_010455.5:72480395-72568964:+
gene4745	1396	18.7738	3080	40.8556	0.459516	-1.12181	2.35361e-138	3.69833e-138	down	yes	LMNB1	protein_coding	chrNC_010444.4:129807228-129862211:+
gene15595	1806	24.2876	3677	48.7747	0.497955	-1.00591	2.98666e-138	4.68565e-138	down	yes	MCUB	protein_coding	chrNC_010450.4:112539188-112651417:-
gene9351	3404	45.778	1676	22.2318	2.05912	1.04203	1.60954e-137	2.51589e-137	up	yes	AMN1	protein_coding	chrNC_010447.5:42518566-42567946:+
gene24151	459	6.17276	1563	20.7329	0.297728	-1.74793	3.21248e-137	5.01884e-137	down	yes	DPP4	protein_coding	chrNC_010457.5:68661764-68742961:-
gene26684	1639	22.0417	3428	45.4718	0.484735	-1.04473	3.46665e-137	5.41025e-137	down	yes	KBTBD2	protein_coding	chrNC_010460.4:40604458-40636401:+
gene26155	1207	16.2321	2781	36.8894	0.44002	-1.18436	2.75585e-136	4.29197e-136	down	yes	PRELID3B	protein_coding	chrNC_010459.5:59175043-59185078:-
gene22504	865	11.6328	2247	29.806	0.390282	-1.35741	3.16042e-136	4.91947e-136	down	yes	PXN	protein_coding	chrNC_010456.5:40227894-40278785:-
gene23241	1214	16.3262	293	3.88659	4.20065	2.07061	1.30277e-135	2.0205e-135	up	yes	IFIT3	protein_coding	chrNC_010456.5:101214730-101225169:+
gene3056	835	11.2293	2194	29.103	0.385848	-1.3739	1.68929e-135	2.61724e-135	down	yes	PTPMT1	protein_coding	chrNC_010444.4:15044432-15052815:-
gene6227	2517	33.8493	1077	14.2862	2.36937	1.24451	3.02862e-135	4.68012e-135	up	yes	RNF103	protein_coding	chrNC_010445.4:58161087-58183750:+
gene1847	1452	19.5269	3138	41.625	0.469115	-1.09199	5.31249e-135	8.19666e-135	down	yes	RUSC2	protein_coding	chrNC_010443.5:236265915-236322958:+
gene17868	1738	23.3731	588	7.79971	2.99667	1.58336	1.99209e-134	3.06885e-134	up	yes	NUDT2	protein_coding	chrNC_010452.4:32450986-32466893:-
gene14822	3187	42.8597	1541	20.4411	2.09674	1.06815	4.03887e-134	6.21232e-134	up	yes	EVC	protein_coding	chrNC_010450.4:4808622-4891236:-
gene20442	2287	30.7562	932	12.3628	2.4878	1.31487	6.84148e-134	1.05069e-133	up	yes	ZNF35	protein_coding	chrNC_010455.5:27902503-27920494:+
gene24663	1452	19.5269	3129	41.5056	0.470465	-1.08784	8.35953e-134	1.28316e-133	down	yes	PID1	protein_coding	chrNC_010457.5:130080821-130215548:-
gene3045	932	12.5338	2336	30.9866	0.404491	-1.30582	1.81447e-133	2.77944e-133	down	yes	PTPRJ	protein_coding	chrNC_010444.4:14548489-14724823:-
gene21635	1249	16.7969	2821	37.42	0.448875	-1.15562	5.52233e-133	8.44186e-133	down	yes	CBLB	protein_coding	chrNC_010455.5:153480525-153700115:+
gene27416	957	12.87	2371	31.4509	0.40921	-1.28909	8.52276e-133	1.30019e-132	down	yes	KIF4A	protein_coding	chrNC_010461.5:56319453-56447560:+
gene7928	287	3.85966	1213	16.0902	0.239876	-2.05964	8.74946e-133	1.33409e-132	down	yes	THBS3	protein_coding	chrNC_010446.5:94612702-94623905:+
gene3702	811	10.9066	112	1.48566	7.34123	2.87602	2.94027e-132	4.47181e-132	up	yes	CYP4F55	protein_coding	chrNC_010444.4:62051989-62071003:-
gene21638	1093	14.699	241	3.19682	4.598	2.20101	6.45975e-132	9.80455e-132	up	yes	ALCAM	protein_coding	chrNC_010455.5:153794991-153998241:-
gene24044	608	8.17656	1795	23.8103	0.343404	-1.54202	8.46525e-132	1.28354e-131	down	yes	PPP2CB	protein_coding	chrNC_010457.5:54295786-54325220:+
gene26795	1226	16.4876	2777	36.8364	0.44759	-1.15975	1.11372e-131	1.6861e-131	down	yes	VOPP1	protein_coding	chrNC_010460.4:48607923-48693858:-
gene21564	3305	44.4466	1638	21.7278	2.04561	1.03253	1.28548e-131	1.94515e-131	up	yes	QTRT2	protein_coding	chrNC_010455.5:145853367-145879863:-
gene24124	1617	21.7459	3352	44.4636	0.489071	-1.03188	1.55973e-131	2.35655e-131	down	yes	PKP4	protein_coding	chrNC_010457.5:65431173-65680891:+
gene10911	213	2.86448	1054	13.9811	0.204882	-2.28713	1.65631e-131	2.50121e-131	down	yes	RTN2	protein_coding	chrNC_010448.4:51855844-51864753:-
gene12778	580	7.80001	1744	23.1338	0.337169	-1.56846	2.7836e-131	4.19717e-131	down	yes	PXDC1	protein_coding	chrNC_010449.5:2231277-2248986:-
gene22097	2915	39.2018	1370	18.1728	2.15717	1.10914	1.85509e-130	2.79009e-130	up	yes	LOC100158108	protein_coding	chrNC_010456.5:4015700-4050258:-
gene21024	1470	19.769	446	5.91611	3.34155	1.74052	3.59933e-130	5.40258e-130	up	yes	PLS1	protein_coding	chrNC_010455.5:83307692-83434133:+
gene645	1528	20.549	3207	42.5402	0.483048	-1.04976	1.80934e-129	2.70628e-129	down	yes	PGM3	protein_coding	chrNC_010443.5:83003622-83029392:+
rna78606	1905	25.619	707	9.37822	2.73175	1.44983	1.8206e-129	2.72175e-129	up	yes	rna78606	protein_coding	chrNC_000845.1:4943-5015:-
gene4892	3290	44.2449	1640	21.7543	2.03385	1.02421	2.52637e-129	3.76555e-129	up	yes	FAM53C	protein_coding	chrNC_010444.4:140330601-140343212:+
gene19254	2878	38.7042	1358	18.0136	2.14861	1.1034	9.07557e-128	1.34465e-127	up	yes	STAT5A	protein_coding	chrNC_010454.4:20474221-20498785:-
gene21364	2505	33.688	1103	14.6311	2.30249	1.2032	9.69942e-128	1.43637e-127	up	yes	RTP4	protein_coding	chrNC_010455.5:125098503-125106770:+
gene19248	1358	18.2628	391	5.18654	3.52119	1.81606	1.41856e-127	2.09967e-127	up	yes	COASY	protein_coding	chrNC_010454.4:20258366-20262849:-
gene11404	2315	31.1328	978	12.973	2.39982	1.26292	2.10808e-127	3.11563e-127	up	yes	ZNF134	protein_coding	chrNC_010448.4:62082810-62121795:+
gene19110	662	8.90276	1860	24.6725	0.360837	-1.47058	2.16201e-127	3.19217e-127	down	yes	CYB561	protein_coding	chrNC_010454.4:15435973-15447104:+
gene26018	3042	40.9097	1482	19.6585	2.08102	1.05729	5.04433e-126	7.38575e-126	up	yes	ELMO2	protein_coding	chrNC_010459.5:48526692-48567665:-
gene4024	2817	37.8838	1325	17.5759	2.15544	1.10799	6.24997e-126	9.14653e-126	up	yes	TMEM205	protein_coding	chrNC_010444.4:70036929-70039801:-
gene18442	1785	24.0052	646	8.56907	2.80138	1.48614	6.34015e-126	9.27395e-126	up	yes	SLC25A30	protein_coding	chrNC_010453.5:21848242-21872781:-
gene13484	328	4.41104	1258	16.6871	0.264338	-1.91955	1.13026e-125	1.64842e-125	down	yes	PIM1	protein_coding	chrNC_010449.5:32788246-32793882:+
gene14516	821	11.041	128	1.6979	6.50278	2.70106	1.40532e-125	2.04858e-125	up	yes	FOS	protein_coding	chrNC_010449.5:98449508-98451971:+
gene4532	2044	27.4883	810	10.7445	2.55836	1.35522	1.75139e-125	2.55057e-125	up	yes	ATP6AP1L	protein_coding	chrNC_010444.4:90680982-90741469:+
gene17147	2036	27.3807	805	10.6782	2.56418	1.35849	1.86912e-125	2.72069e-125	up	yes	SEMA3A	protein_coding	chrNC_010451.4:95934937-96387950:+
gene7954	2801	37.6686	1317	17.4698	2.15622	1.1085	2.54977e-125	3.70783e-125	up	yes	ADAR	protein_coding	chrNC_010446.5:95154230-95197308:+
gene21446	2060	27.7035	821	10.8904	2.54384	1.34701	2.69093e-125	3.90928e-125	up	yes	TNK2	protein_coding	chrNC_010455.5:134082266-134124826:+
gene26200	464	6.24	1503	19.937	0.312986	-1.67583	1.51363e-124	2.19361e-124	down	yes	SLC17A9	protein_coding	chrNC_010459.5:62186114-62200091:+
gene23603	52	0.699311	635	8.42316	0.0830224	-3.59035	2.14799e-124	3.10993e-124	down	yes	AWN	protein_coding	chrNC_010456.5:132240887-132248034:+
gene17052	1000	13.4483	2379	31.557	0.426159	-1.23054	4.8878e-124	7.05958e-124	down	yes	ETV1	protein_coding	chrNC_010451.4:83322818-83567136:-
gene14527	712	9.57518	1922	25.495	0.375571	-1.41284	5.16594e-124	7.4577e-124	down	yes	IFT43	protein_coding	chrNC_010449.5:99155889-99254436:+
gene20841	1364	18.3435	406	5.38551	3.40607	1.76811	1.46775e-123	2.11275e-123	up	yes	HRH1	protein_coding	chrNC_010455.5:67209261-67411172:+
rna78613	1714	23.0504	612	8.11806	2.83939	1.50558	2.61593e-123	3.76186e-123	up	yes	rna78613	protein_coding	chrNC_000845.1:8059-8129:-
gene3699	874	11.7538	156	2.06931	5.68006	2.50591	3.71638e-123	5.33666e-123	up	yes	LOC110255237	protein_coding	chrNC_010444.4:61893963-61917944:-
gene15176	1597	21.4769	544	7.21606	2.97627	1.5735	1.38859e-122	1.99016e-122	up	yes	LOC100621115	protein_coding	chrNC_010450.4:56221642-56232182:-
gene12102	628	8.44552	56	0.742829	11.3694	3.50708	1.6041e-122	2.29683e-122	up	yes	APCDD1	protein_coding	chrNC_010448.4:97991418-98026590:-
gene26598	571	7.67897	1675	22.2186	0.345611	-1.53278	4.67294e-122	6.68134e-122	down	yes	AASS	protein_coding	chrNC_010460.4:24938366-25039197:+
gene1047	434	5.83656	1435	19.035	0.306622	-1.70547	6.14206e-122	8.77767e-122	down	yes	CHAC1	protein_coding	chrNC_010443.5:130360510-130363332:-
gene6186	2472	33.2442	1108	14.6974	2.26191	1.17754	6.5749e-122	9.38725e-122	up	yes	INPP4A	protein_coding	chrNC_010445.4:55711025-55779579:-
gene12908	499	6.71069	1550	20.5605	0.326388	-1.61534	6.60014e-122	9.41878e-122	down	yes	TPMT	protein_coding	chrNC_010449.5:13821656-13846107:-
gene11596	2696	36.2566	1263	16.7535	2.16413	1.11378	1.30548e-121	1.86121e-121	up	yes	UBE4B	protein_coding	chrNC_010448.4:70345789-70462434:+
gene20419	2476	33.298	1113	14.7637	2.25539	1.17338	1.99289e-121	2.83718e-121	up	yes	ZNF662	protein_coding	chrNC_010455.5:26309983-26352554:+
gene20437	3049	41.0038	1512	20.0564	2.04443	1.0317	2.03904e-121	2.9015e-121	up	yes	ZNF445	protein_coding	chrNC_010455.5:27748437-27783348:-
gene23987	139	1.86931	844	11.1955	0.16697	-2.58234	2.40871e-121	3.42427e-121	down	yes	TLR3	protein_coding	chrNC_010457.5:46966262-46977774:+
gene8275	1019	13.7038	2389	31.6896	0.432438	-1.20943	2.9837e-121	4.23563e-121	down	yes	PPM1J	protein_coding	chrNC_010446.5:107723427-107728919:+
gene28381	2122	28.5373	879	11.6598	2.4475	1.29131	5.38446e-121	7.62558e-121	up	yes	MAN1B1	protein_coding	chrNW_018084833.1:785370-795131:-
gene21904	2264	30.4469	973	12.9067	2.35901	1.23818	6.77185e-121	9.58589e-121	up	yes	MRPS6	protein_coding	chrNC_010455.5:197687906-197756773:+
gene11718	2235	30.0569	954	12.6546	2.37517	1.24803	7.67378e-121	1.08575e-120	up	yes	AKR7A2	protein_coding	chrNC_010448.4:77754172-77761609:-
gene8985	2004	26.9504	806	10.6914	2.52074	1.33385	3.77569e-120	5.32446e-120	up	yes	CALCOCO1	protein_coding	chrNC_010447.5:18910698-18930402:-
gene13632	1184	15.9228	317	4.20495	3.78668	1.92093	4.02932e-120	5.67677e-120	up	yes	TNFRSF21	protein_coding	chrNC_010449.5:42020219-42091521:-
gene4732	1172	15.7614	312	4.13862	3.80837	1.92917	1.36e-119	1.91064e-119	up	yes	ZNF608	protein_coding	chrNC_010444.4:128048247-128156769:-
gene10046	1147	15.4252	300	3.97944	3.87622	1.95465	4.17791e-119	5.8557e-119	up	yes	ACSF3	protein_coding	chrNC_010448.4:663201-708800:-
gene7425	611	8.2169	1724	22.8685	0.35931	-1.4767	6.08209e-119	8.51657e-119	down	yes	STAU2	protein_coding	chrNC_010446.5:62139456-62455509:+
gene16647	1757	23.6286	657	8.71498	2.71127	1.43897	3.03867e-118	4.23509e-118	up	yes	OAF	protein_coding	chrNC_010451.4:47344916-47363768:+
gene11711	2775	37.319	1337	17.7351	2.10425	1.07331	6.05795e-118	8.43134e-118	up	yes	ALDH4A1	protein_coding	chrNC_010448.4:77373999-77404015:-
gene11818	2221	29.8686	958	12.7077	2.35044	1.23293	7.34544e-118	1.02185e-117	up	yes	MAN1C1	protein_coding	chrNC_010448.4:83089942-83228648:+
gene21466	3099	41.6762	1568	20.7992	2.00374	1.0027	8.34518e-118	1.16038e-117	up	yes	ITGB5	protein_coding	chrNC_010455.5:135468111-135587483:+
gene26594	1663	22.3645	601	7.97215	2.80533	1.48817	1.09373e-117	1.51869e-117	up	yes	CADPS2	protein_coding	chrNC_010460.4:24372547-24867287:+
gene5068	1458	19.6076	3013	39.9669	0.490596	-1.02739	1.34002e-117	1.85722e-117	down	yes	LOC100514340	protein_coding	chrNC_010444.4:150561382-150578201:+
gene7399	392	5.27173	1334	17.6953	0.297918	-1.74702	2.53991e-117	3.51369e-117	down	yes	ZC2HC1A	protein_coding	chrNC_010446.5:57761249-57819891:-
gene5780	2607	35.0597	1224	16.2361	2.15936	1.11061	3.96169e-117	5.47549e-117	up	yes	UBN1	protein_coding	chrNC_010445.4:37512306-37555255:-
gene2474	2219	29.8417	961	12.7475	2.34099	1.22712	6.72867e-117	9.28256e-117	up	yes	TSPAN4	protein_coding	chrNC_010444.4:532087-546920:+
gene10976	504	6.77794	4	0.0530592	127.743	6.9971	7.33241e-117	1.01108e-116	up	yes	SULT2A1	protein_coding	chrNC_010448.4:53525496-53536723:-
gene17180	1880	25.2828	742	9.84249	2.56874	1.36106	2.53218e-116	3.47082e-116	up	yes	FAM185A	protein_coding	chrNC_010451.4:102919943-103001102:+
gene22582	806	10.8393	139	1.84381	5.87876	2.55551	3.2444e-116	4.44092e-116	up	yes	TPST2	protein_coding	chrNC_010456.5:44122156-44140654:-
gene3665	1290	17.3483	2758	36.5843	0.4742	-1.07643	3.35612e-116	4.59174e-116	down	yes	TMEM38A	protein_coding	chrNC_010444.4:60929043-60960527:-
gene6153	1926	25.9014	772	10.2404	2.52933	1.33875	3.42255e-116	4.68048e-116	up	yes	TBC1D8	protein_coding	chrNC_010445.4:53149059-53289249:+
gene3586	628	8.44552	1734	23.0012	0.367178	-1.44545	6.37633e-116	8.71191e-116	down	yes	ARMC6	protein_coding	chrNC_010444.4:58808691-58828483:-
gene4685	753	10.1266	1934	25.6541	0.394734	-1.34105	2.12224e-115	2.89298e-115	down	yes	LVRN	protein_coding	chrNC_010444.4:120117584-120193728:+
gene433	225	3.02586	1003	13.3046	0.22743	-2.13651	2.64829e-115	3.60842e-115	down	yes	NT5E	protein_coding	chrNC_010443.5:54400786-54450743:+
gene721	981	13.1928	2287	30.3366	0.434879	-1.20131	6.00357e-115	8.17268e-115	down	yes	HAUS1	protein_coding	chrNC_010443.5:95756297-95774245:+
gene4895	824	11.0814	150	1.98972	5.56932	2.4775	9.40609e-115	1.2787e-114	up	yes	EGR1	protein_coding	chrNC_010444.4:140440829-140445302:+
gene5676	892	11.9959	2147	28.4795	0.42121	-1.24739	1.63803e-114	2.22478e-114	down	yes	GPRC5B	protein_coding	chrNC_010445.4:25870369-25896113:+
gene2925	319	4.29	1182	15.679	0.273614	-1.86978	3.59562e-114	4.87692e-114	down	yes	FAM111B	protein_coding	chrNC_010444.4:12268692-12279386:-
gene19919	251	3.37552	1048	13.9015	0.242817	-2.04206	9.47776e-114	1.2826e-113	down	yes	PIMREG	protein_coding	chrNC_010454.4:50898493-50903238:-
gene19828	1686	22.6738	630	8.35683	2.71321	1.44	1.15153e-113	1.55693e-113	up	yes	HIC1	protein_coding	chrNC_010454.4:48167861-48172540:+
gene22196	2147	28.8735	928	12.3097	2.34558	1.22994	1.42571e-113	1.92676e-113	up	yes	EXTL3	protein_coding	chrNC_010456.5:12437551-12563548:+
gene19184	2536	34.1049	1195	15.8514	2.15153	1.10536	3.86963e-113	5.21304e-113	up	yes	SLC25A39	protein_coding	chrNC_010454.4:18913261-18919761:+
gene22316	848	11.4041	2069	27.4449	0.415529	-1.26698	4.23467e-113	5.70224e-113	down	yes	STX2	protein_coding	chrNC_010456.5:24341473-24380536:+
gene15510	913	12.2783	2165	28.7183	0.427542	-1.22586	2.15379e-112	2.8833e-112	down	yes	CCNA2	protein_coding	chrNC_010450.4:102260346-102266274:+
gene23578	759	10.2072	1924	25.5215	0.399947	-1.32212	2.26277e-112	3.02646e-112	down	yes	GRK5	protein_coding	chrNC_010456.5:129113933-129351135:+
gene98	2322	31.2269	1052	13.9546	2.23775	1.16205	2.81429e-112	3.75907e-112	up	yes	TMEM181	protein_coding	chrNC_010443.5:8564752-8642358:-
gene27062	2338	31.4421	1063	14.1005	2.22986	1.15695	2.93259e-112	3.91534e-112	up	yes	KLHL15	protein_coding	chrNC_010461.5:20088208-20130452:-
gene26080	615	8.2707	1689	22.4043	0.369157	-1.43769	4.51287e-112	6.01711e-112	down	yes	BCAS4	protein_coding	chrNC_010459.5:52239359-52304259:+
gene16757	1777	23.8976	694	9.20578	2.59593	1.37625	6.64522e-112	8.85232e-112	up	yes	SIAE	protein_coding	chrNC_010451.4:51879220-51918974:-
gene11905	1415	19.0293	472	6.26099	3.03935	1.60376	7.88583e-112	1.04956e-111	up	yes	SRSF4	protein_coding	chrNC_010448.4:86064776-86092769:-
gene10888	1282	17.2407	395	5.2396	3.29046	1.71829	8.82883e-112	1.17454e-111	up	yes	CLPTM1	protein_coding	chrNC_010448.4:51411774-51441644:+
gene25460	1101	14.8066	295	3.91312	3.78383	1.91985	9.35202e-112	1.24359e-111	up	yes	SLC7A2	protein_coding	chrNC_010459.5:5191973-5271849:+
gene7491	736	9.89794	117	1.55198	6.37761	2.67302	1.49288e-111	1.98252e-111	up	yes	TTPA	protein_coding	chrNC_010446.5:70960580-70980883:+
gene11880	2799	37.6418	1391	18.4514	2.04005	1.02861	4.39148e-111	5.8137e-111	up	yes	EYA3	protein_coding	chrNC_010448.4:85095409-85185856:-
gene20598	463	6.22656	13	0.172443	36.108	5.17425	1.58005e-110	2.08713e-110	up	yes	CISH	protein_coding	chrNC_010455.5:33086280-33090540:-
gene23339	2081	27.9859	898	11.9118	2.34942	1.23231	1.81033e-110	2.39026e-110	up	yes	RRP12	protein_coding	chrNC_010456.5:108772172-108805513:-
gene26982	2574	34.6159	1238	16.4218	2.10792	1.07582	5.92983e-110	7.80524e-110	up	yes	MOSPD2	protein_coding	chrNC_010461.5:11409157-11473969:+
gene7319	1000	13.4483	2276	30.1907	0.445444	-1.16668	2.69627e-109	3.54433e-109	down	yes	TRIQK	protein_coding	chrNC_010446.5:43707839-43797108:+
gene11998	1237	16.6355	2624	34.8069	0.477938	-1.0651	8.58048e-109	1.12397e-108	down	yes	AGO4	protein_coding	chrNC_010448.4:91967499-92013030:+
gene24763	128	1.72138	763	10.1211	0.170079	-2.55572	1.18168e-108	1.54653e-108	down	yes	RAMP1	protein_coding	chrNC_010457.5:137490440-137535555:+
gene8236	150	2.01724	812	10.771	0.187284	-2.4167	1.6826e-108	2.19827e-108	down	yes	NGF	protein_coding	chrNC_010446.5:105256691-105307843:+
gene8443	1000	13.4483	2270	30.1111	0.446622	-1.16287	1.86655e-108	2.43752e-108	down	yes	PTBP2	protein_coding	chrNC_010446.5:120961211-121041876:-
gene19938	1218	16.38	2593	34.3957	0.476223	-1.07029	2.27297e-108	2.96567e-108	down	yes	SPAG7	protein_coding	chrNC_010454.4:51948788-51953587:+
gene1565	1113	14.9679	312	4.13862	3.61665	1.85465	6.56554e-108	8.55147e-108	up	yes	RHOJ	protein_coding	chrNC_010443.5:194761588-194843867:-
gene3075	2341	31.4824	1087	14.4188	2.18342	1.12659	8.67691e-108	1.12769e-107	up	yes	ATG13	protein_coding	chrNC_010444.4:15856859-15916122:-
gene26759	844	11.3504	174	2.30808	4.91767	2.29797	9.81197e-108	1.27409e-107	up	yes	SNX10	protein_coding	chrNC_010460.4:46064575-46142983:-
gene24075	2662	35.7993	1312	17.4034	2.05703	1.04056	9.93034e-108	1.2889e-107	up	yes	HS6ST1	protein_coding	chrNC_010457.5:59066448-59108780:+
gene18736	2606	35.0462	1274	16.8994	2.07382	1.05229	2.01495e-107	2.60849e-107	up	yes	TMCO3	protein_coding	chrNC_010453.5:78709010-78753431:+
gene19452	2631	35.3824	1292	17.1381	2.06454	1.04582	2.29696e-107	2.97228e-107	up	yes	ZNF652	protein_coding	chrNC_010454.4:25484518-25553939:-
gene24846	987	13.2735	247	3.27641	4.05122	2.01836	4.27531e-107	5.52509e-107	up	yes	FAM105A	protein_coding	chrNC_010458.4:3964300-4000673:+
gene12506	1359	18.2762	2787	36.969	0.494366	-1.01635	4.86091e-107	6.27644e-107	down	yes	LRRC42	protein_coding	chrNC_010448.4:158316225-158338302:-
gene11611	1983	26.6679	849	11.2618	2.368	1.24367	7.35986e-107	9.49488e-107	up	yes	SRM	protein_coding	chrNC_010448.4:71246895-71253534:-
gene1283	962	12.9373	2201	29.1958	0.44312	-1.17423	7.85235e-107	1.01259e-106	down	yes	ATP8B1	protein_coding	chrNC_010443.5:162936209-163063040:+
gene18104	1712	23.0235	674	8.94048	2.57519	1.36468	1.58428e-106	2.03946e-106	up	yes	DHTKD1	protein_coding	chrNC_010452.4:59820418-59875322:-
gene4927	690	9.27932	1775	23.545	0.394109	-1.34333	2.40383e-106	3.09046e-106	down	yes	CYSTM1	protein_coding	chrNC_010444.4:141945032-142010239:+
gene13365	2330	31.3345	1087	14.4188	2.17316	1.1198	2.86534e-106	3.68222e-106	up	yes	HSD17B8	protein_coding	chrNC_010449.5:25247577-25249786:+
gene1656	480	6.45518	26	0.344885	18.7169	4.22627	2.9582e-106	3.79991e-106	up	yes	ACER2	protein_coding	chrNC_010443.5:203387669-203415018:-
gene6714	2663	35.8128	1321	17.5228	2.04378	1.03124	3.22252e-106	4.13767e-106	up	yes	CAD	protein_coding	chrNC_010445.4:111887017-111914511:-
gene9122	2455	33.0155	1176	15.5994	2.11646	1.08165	7.18237e-106	9.2062e-106	up	yes	SUOX	protein_coding	chrNC_010447.5:21395246-21399715:+
gene8700	2148	28.8869	965	12.8005	2.25669	1.17421	1.01806e-105	1.30269e-105	up	yes	TOB2	protein_coding	chrNC_010447.5:7086397-7098643:+
gene17008	519	6.97966	41	0.543857	12.8336	3.68186	2.54898e-105	3.2463e-105	up	yes	PDK4	protein_coding	chrNC_010451.4:75246956-75260134:-
gene1256	1682	22.62	661	8.76804	2.57983	1.36727	5.4226e-105	6.90017e-105	up	yes	ZCCHC2	protein_coding	chrNC_010443.5:158964816-159022143:-
gene6329	639	8.59345	1684	22.3379	0.384702	-1.37819	6.00716e-105	7.64076e-105	down	yes	RAB11FIP5	protein_coding	chrNC_010445.4:69656660-69699542:+
gene19268	2352	31.6304	1110	14.7239	2.14823	1.10315	9.74805e-105	1.23831e-104	up	yes	KLHL11	protein_coding	chrNC_010454.4:20842102-20854344:+
gene9386	923	12.4128	2122	28.1479	0.440983	-1.1812	5.03813e-104	6.3729e-104	down	yes	SSPN	protein_coding	chrNC_010447.5:47566266-47609330:-
gene7142	543	7.30242	1519	20.1492	0.362416	-1.46428	9.63348e-104	1.21651e-103	down	yes	COL14A1	protein_coding	chrNC_010446.5:18690197-18925111:-
gene12458	1861	25.0273	784	10.3996	2.40656	1.26697	2.62442e-103	3.3057e-103	up	yes	FGGY	protein_coding	chrNC_010448.4:152754923-153213179:-
gene13238	411	5.52725	1290	17.1116	0.323011	-1.63034	4.01855e-103	5.05747e-103	down	yes	PPP1R18	protein_coding	chrNC_010449.5:23211806-23222295:-
gene4513	2502	33.6476	1224	16.2361	2.07239	1.0513	4.67706e-103	5.88375e-103	up	yes	FAM151B	protein_coding	chrNC_010444.4:89109259-89144270:+
gene20257	2418	32.518	1165	15.4535	2.10424	1.0733	5.06801e-103	6.37287e-103	up	yes	TBC1D5	protein_coding	chrNC_010455.5:4191544-4738448:-
gene25120	910	12.2379	2094	27.7765	0.440586	-1.1825	7.46039e-103	9.36938e-103	down	yes	CENPK	protein_coding	chrNC_010458.4:44008673-44080565:-
gene21170	775	10.4224	1886	25.0174	0.416606	-1.26324	8.39283e-103	1.05271e-102	down	yes	TRIM59	protein_coding	chrNC_010455.5:100118824-100133117:-
gene8520	534	7.18138	1498	19.8707	0.361406	-1.46831	9.52539e-103	1.19376e-102	down	yes	GBP1	protein_coding	chrNC_010446.5:127425699-127442132:+
gene29044	1126	15.1428	2412	31.9947	0.47329	-1.0792	2.75355e-102	3.44509e-102	down	yes	METTL7A	protein_coding	chrNW_018085018.1:418974-429278:-
gene24839	816	10.9738	1946	25.8133	0.425122	-1.23405	2.87965e-102	3.59983e-102	down	yes	ANKRD33B	protein_coding	chrNC_010458.4:149486-233815:+
gene6143	507	6.81828	41	0.543857	12.5369	3.64811	2.97144e-102	3.71147e-102	up	yes	IL1R2	protein_coding	chrNC_010445.4:52367434-52406393:-
gene6792	470	6.32069	1386	18.385	0.343796	-1.54038	4.65075e-102	5.78962e-102	down	yes	RHOB	protein_coding	chrNC_010445.4:117773400-117777569:-
gene7182	648	8.71449	97	1.28669	6.77281	2.75976	9.13202e-102	1.13399e-101	up	yes	SYBU	protein_coding	chrNC_010446.5:27899264-27975389:+
gene23081	1609	21.6383	630	8.35683	2.58929	1.37256	4.21632e-101	5.21616e-101	up	yes	TMEM254	protein_coding	chrNC_010456.5:81931294-81940443:-
gene1715	2468	33.1904	1212	16.077	2.06447	1.04577	7.95451e-101	9.83267e-101	up	yes	ERMP1	protein_coding	chrNC_010443.5:216312827-216382063:+
gene8594	2125	28.5776	973	12.9067	2.21417	1.14677	8.42954e-101	1.04156e-100	up	yes	PIM3	protein_coding	chrNC_010447.5:677705-680690:-
gene12590	1986	26.7083	880	11.673	2.28803	1.19411	1.72677e-100	2.13007e-100	up	yes	EFCAB14	protein_coding	chrNC_010448.4:164777972-164821371:+
gene17755	286	3.84621	1049	13.9148	0.276412	-1.85511	1.73854e-100	2.1437e-100	down	yes	SHISA4	protein_coding	chrNC_010452.4:24158648-24161504:+
gene11936	482	6.48207	1397	18.5309	0.349797	-1.51541	1.85772e-100	2.28971e-100	down	yes	CCDC28B	protein_coding	chrNC_010448.4:88678166-88682825:+
gene19229	1648	22.1628	661	8.76804	2.52768	1.33781	1.34777e-99	1.65163e-99	up	yes	LOC100520329	protein_coding	chrNC_010454.4:20013616-20021507:-
gene25688	1424	19.1504	520	6.8977	2.77634	1.47318	1.41953e-99	1.73743e-99	up	yes	FASTKD5	protein_coding	chrNC_010459.5:32520625-32532786:+
gene28661	994	13.3676	2196	29.1295	0.458902	-1.12374	1.76791e-99	2.16205e-99	down	yes	LOC100523107	protein_coding	chrNW_018084924.1:31679-39950:-
gene26792	998	13.4214	2201	29.1958	0.459702	-1.12123	2.38403e-99	2.91314e-99	down	yes	HUS1	protein_coding	chrNC_010460.4:48522914-48539267:+
gene1680	1248	16.7835	2566	34.0375	0.493087	-1.02009	2.71805e-99	3.31857e-99	down	yes	SNAPC3	protein_coding	chrNC_010443.5:207215731-207252421:-
gene3366	1242	16.7028	412	5.4651	3.05626	1.61177	4.32487e-99	5.26962e-99	up	yes	GUK1	protein_coding	chrNC_010444.4:51247665-51257481:+
gene10292	804	10.8124	174	2.30808	4.6846	2.22793	5.34584e-99	6.51097e-99	up	yes	MT-2B	protein_coding	chrNC_010448.4:18645125-18646034:+
gene1111	1657	22.2838	670	8.88742	2.50734	1.32616	8.11029e-99	9.86987e-99	up	yes	ZNF770	protein_coding	chrNC_010443.5:136121105-136129838:+
gene21648	2560	34.4276	1289	17.0983	2.01351	1.00971	9.20132e-99	1.11885e-98	up	yes	NXPE3	protein_coding	chrNC_010455.5:157298831-157337904:-
gene26451	1176	15.8152	2454	32.5518	0.485846	-1.04143	2.89696e-98	3.51401e-98	down	yes	PTN	protein_coding	chrNC_010460.4:12219708-12309045:+
gene13247	1142	15.3579	357	4.73554	3.24313	1.69738	4.09618e-98	4.96261e-98	up	yes	VARS2	protein_coding	chrNC_010449.5:23404400-23416442:+
gene17540	1029	13.8383	294	3.89985	3.54841	1.82717	6.11848e-98	7.40966e-98	up	yes	RGS2	protein_coding	chrNC_010452.4:936836-940083:-
gene18031	962	12.9373	2137	28.3469	0.45639	-1.13166	6.16173e-98	7.459e-98	down	yes	ARHGAP21	protein_coding	chrNC_010452.4:50541582-50680156:+
gene2247	865	11.6328	207	2.74582	4.23654	2.08289	6.49256e-98	7.85631e-98	up	yes	ZBTB43	protein_coding	chrNC_010443.5:267391575-267410947:+
gene21029	1264	16.9986	429	5.6906	2.98714	1.57877	6.78248e-98	8.2038e-98	up	yes	CHST2	protein_coding	chrNC_010455.5:83818652-83822135:+
gene24504	63	0.847242	558	7.40176	0.114465	-3.12702	8.70492e-98	1.05163e-97	down	yes	MYL1	protein_coding	chrNC_010457.5:113038083-113051315:-
gene13725	1960	26.3586	876	11.62	2.26839	1.18167	1.35485e-97	1.63545e-97	up	yes	FAH	protein_coding	chrNC_010449.5:49047833-49087790:+
gene25917	2266	30.4738	1087	14.4188	2.11347	1.07961	1.41704e-97	1.70914e-97	up	yes	PLCG1	protein_coding	chrNC_010459.5:43810003-43844553:+
gene19522	1628	21.8938	657	8.71498	2.5122	1.32895	1.97519e-97	2.3785e-97	up	yes	PCTP	protein_coding	chrNC_010454.4:32043841-32089977:+
gene17598	1796	24.1531	767	10.1741	2.37398	1.24731	2.11075e-97	2.54072e-97	up	yes	DUSP10	protein_coding	chrNC_010452.4:10866446-10905852:-
gene18792	2156	28.9945	1013	13.4373	2.15777	1.10954	4.68939e-97	5.62874e-97	up	yes	LOC110255927	protein_coding	chrNC_010454.4:978131-980042:+
gene11588	2056	27.6497	947	12.5618	2.2011	1.13822	1.89317e-96	2.26058e-96	up	yes	SLC25A33	protein_coding	chrNC_010448.4:69934810-69969091:+
gene22016	1156	15.5462	373	4.94777	3.14206	1.65171	1.35347e-95	1.60905e-95	up	yes	SIK1	protein_coding	chrNC_010455.5:206454695-206465802:-
gene17919	132	1.77517	713	9.45781	0.187694	-2.41355	2.29099e-95	2.72035e-95	down	yes	MKX	protein_coding	chrNC_010452.4:39096778-39173384:-
gene8414	1508	20.28	589	7.81297	2.59568	1.37611	3.04014e-95	3.60274e-95	up	yes	EXTL2	protein_coding	chrNC_010446.5:117396601-117420707:+
gene29445	850	11.431	206	2.73255	4.18329	2.06464	3.42416e-95	4.0546e-95	up	yes	LOC110258721	protein_coding	chrNW_018085187.1:11736-20590:+
gene25462	728	9.79035	146	1.93666	5.05527	2.33779	4.3375e-95	5.13e-95	up	yes	MTUS1	protein_coding	chrNC_010459.5:5331668-5507212:-
gene24700	418	5.62138	1255	16.6473	0.337675	-1.56629	7.81408e-95	9.23446e-95	down	yes	PDE6D	protein_coding	chrNC_010457.5:132376117-132426678:-
gene19266	1177	15.8286	388	5.14675	3.07546	1.6208	9.47797e-95	1.11919e-94	up	yes	TTC25	protein_coding	chrNC_010454.4:20766088-20791527:-
gene24631	1939	26.0762	876	11.62	2.24409	1.16613	1.35569e-94	1.59832e-94	up	yes	MRPL44	protein_coding	chrNC_010457.5:125732419-125739819:+
gene10774	475	6.38794	1350	17.9075	0.356719	-1.48714	1.58479e-94	1.86621e-94	down	yes	NUMBL	protein_coding	chrNC_010448.4:48890056-48918195:-
gene22141	2420	32.5449	1213	16.0902	2.02265	1.01625	1.90761e-94	2.2437e-94	up	yes	LOC100737977	protein_coding	chrNC_010456.5:7344788-7371086:-
gene14486	1598	21.4904	651	8.63539	2.48864	1.31536	3.39035e-94	3.9861e-94	up	yes	PNMA1	protein_coding	chrNC_010449.5:97049150-97051857:-
gene222	377	5.07	1180	15.6525	0.323911	-1.62633	3.62589e-94	4.25967e-94	down	yes	ABRACL	protein_coding	chrNC_010443.5:25432314-25447016:-
gene15765	915	12.3052	244	3.23661	3.80187	1.92671	1.22346e-93	1.43167e-93	up	yes	ABRAXAS1	protein_coding	chrNC_010450.4:135002297-135021205:+
gene21159	297	3.99414	1033	13.7025	0.291489	-1.77849	1.56543e-93	1.83041e-93	down	yes	LOC100514494	protein_coding	chrNC_010455.5:98858981-99633023:+
gene26753	2377	31.9666	1188	15.7586	2.02852	1.02043	2.03285e-93	2.37602e-93	up	yes	SKAP2	protein_coding	chrNC_010460.4:45636929-45813748:+
gene29285	1028	13.8248	2198	29.1561	0.474167	-1.07653	5.15156e-93	6.00943e-93	down	yes	LOC110258617	protein_coding	chrNW_018085120.1:11334-45129:-
gene10920	1204	16.1917	410	5.43857	2.9772	1.57396	6.18434e-93	7.21138e-93	up	yes	QPCTL	protein_coding	chrNC_010448.4:52043171-52050292:+
gene19885	1040	13.9862	315	4.17842	3.34725	1.74298	7.63286e-93	8.89004e-93	up	yes	SHPK	protein_coding	chrNC_010454.4:49713224-49732319:-
gene7449	968	13.0179	275	3.64782	3.56869	1.83539	8.37941e-93	9.75194e-93	up	yes	C4H8orf34	protein_coding	chrNC_010446.5:66275896-66637493:-
gene18321	1215	16.3397	2464	32.6845	0.499921	-1.00023	1.94306e-92	2.25518e-92	down	yes	RFC3	protein_coding	chrNC_010453.5:10145927-10524472:+
gene14669	2182	29.3442	1056	14.0076	2.09487	1.06686	2.89824e-92	3.35334e-92	up	yes	SYNE3	protein_coding	chrNC_010449.5:116666238-116770305:-
gene3136	2278	30.6352	1126	14.9362	2.05107	1.03638	7.15219e-92	8.25289e-92	up	yes	COMMD9	protein_coding	chrNC_010444.4:24819221-24838836:+
gene19391	1843	24.7852	824	10.9302	2.26759	1.18116	8.03157e-92	9.26402e-92	up	yes	MLLT6	protein_coding	chrNC_010454.4:23380190-23404853:-
gene1829	468	6.2938	1322	17.5361	0.358906	-1.47832	8.29256e-92	9.56137e-92	down	yes	LOC100524475	protein_coding	chrNC_010443.5:234278168-234370655:-
gene17530	1420	19.0966	547	7.25585	2.63188	1.3961	9.60581e-92	1.10713e-91	up	yes	EGFR	protein_coding	chrNC_010451.4:139302410-139474632:+
gene27326	1654	22.2435	699	9.2721	2.39897	1.26241	1.58907e-91	1.83009e-91	up	yes	TSPYL2	protein_coding	chrNC_010461.5:45909688-45916859:+
gene10905	1073	14.43	338	4.48351	3.21847	1.68637	1.78643e-91	2.05658e-91	up	yes	ERCC2	protein_coding	chrNC_010448.4:51734318-51757508:-
gene5745	1626	21.8669	682	9.0466	2.41714	1.2733	3.38445e-91	3.89326e-91	up	yes	DEXI	protein_coding	chrNC_010445.4:32160222-32173024:+
gene26473	816	10.9738	1868	24.7787	0.442873	-1.17504	4.66559e-91	5.35874e-91	down	yes	AGBL3	protein_coding	chrNC_010460.4:14163354-14265504:-
gene22223	1660	22.3242	706	9.36496	2.3838	1.25326	7.82905e-91	8.98527e-91	up	yes	NEIL2	protein_coding	chrNC_010456.5:14945129-14966305:+
gene10765	1029	13.8383	2182	28.9438	0.478109	-1.06459	1.00847e-90	1.15518e-90	down	yes	SERTAD3	protein_coding	chrNC_010448.4:48709064-48713113:-
gene1035	411	5.52725	1219	16.1698	0.341825	-1.54867	1.08943e-90	1.24697e-90	down	yes	TYRO3	protein_coding	chrNC_010443.5:129811540-129829395:-
gene13300	1753	23.5748	769	10.2006	2.31111	1.20859	1.33158e-90	1.52355e-90	up	yes	NEU1	protein_coding	chrNC_010449.5:23953721-23958659:-
gene15721	234	3.1469	899	11.9251	0.263889	-1.92199	1.62456e-90	1.85804e-90	down	yes	ABCG2	protein_coding	chrNC_010450.4:130853414-130945388:+
gene24582	1615	21.719	678	8.99354	2.41495	1.272	1.88502e-90	2.15429e-90	up	yes	ABCB6	protein_coding	chrNC_010457.5:121246180-121254350:-
gene3704	848	11.4041	217	2.87846	3.96189	1.98619	2.07767e-90	2.37355e-90	up	yes	PGLYRP2	protein_coding	chrNC_010444.4:62135578-62140180:+
gene10518	662	8.90276	125	1.6581	5.36925	2.42472	2.34868e-90	2.68214e-90	up	yes	NETO2	protein_coding	chrNC_010448.4:37443534-37506589:+
gene9214	1657	22.2838	707	9.37822	2.37612	1.24861	3.71462e-90	4.24037e-90	up	yes	LRIG3	protein_coding	chrNC_010447.5:24066611-24117971:-
gene1119	231	3.10655	891	11.8189	0.262845	-1.92771	4.47382e-90	5.10508e-90	down	yes	GREM1	protein_coding	chrNC_010443.5:136617041-136629293:+
gene8069	152	2.04414	732	9.70984	0.210522	-2.24795	4.64144e-90	5.29433e-90	down	yes	MLLT11	protein_coding	chrNC_010446.5:98165990-98171674:-
gene11848	909	12.2245	251	3.32947	3.67161	1.87641	7.32253e-90	8.33661e-90	up	yes	SFN	protein_coding	chrNC_010448.4:84188521-84189824:+
gene1947	695	9.34656	1674	22.2053	0.420916	-1.2484	8.02322e-90	9.13085e-90	down	yes	MSANTD3	protein_coding	chrNC_010443.5:242168922-242194873:+
gene3359	2322	31.2269	1169	15.5066	2.01379	1.00991	8.67358e-90	9.86348e-90	up	yes	SNAP47	protein_coding	chrNC_010444.4:50812309-50921744:+
gene19239	1312	17.6442	487	6.45996	2.73131	1.44959	9.46104e-90	1.07549e-89	up	yes	EZH1	protein_coding	chrNC_010454.4:20107744-20139764:+
gene659	733	9.85759	1732	22.9747	0.429064	-1.22074	1.01545e-89	1.15387e-89	down	yes	TTK	protein_coding	chrNC_010443.5:86076576-86125334:-
gene14479	1800	24.2069	805	10.6782	2.26695	1.18075	1.12259e-89	1.27465e-89	up	yes	RIOX1	protein_coding	chrNC_010449.5:96823073-96831582:+
gene2827	1123	15.1024	373	4.94777	3.05237	1.60993	1.2315e-89	1.39778e-89	up	yes	SDHAF2	protein_coding	chrNC_010444.4:10074965-10088185:-
gene14532	855	11.4983	1915	25.4021	0.452651	-1.14353	2.04448e-89	2.31524e-89	down	yes	VASH1	protein_coding	chrNC_010449.5:99910644-99933633:+
gene19796	1447	19.4597	574	7.614	2.55577	1.35376	2.94977e-89	3.3379e-89	up	yes	GEMIN4	protein_coding	chrNC_010454.4:47109358-47116699:+
gene2651	1025	13.7845	2164	28.7051	0.480211	-1.05826	3.8873e-89	4.39379e-89	down	yes	C2H11orf68	protein_coding	chrNC_010444.4:6411946-6414286:+
gene2341	955	12.8431	2061	27.3388	0.469776	-1.08995	4.50239e-89	5.0871e-89	down	yes	NCS1	protein_coding	chrNC_010443.5:270274504-270334908:+
gene12252	1732	23.2924	762	10.1078	2.3044	1.20439	4.6496e-89	5.25144e-89	up	yes	ZNF397	protein_coding	chrNC_010448.4:119076683-119130735:+
gene879	435	5.85	1249	16.5677	0.353096	-1.50187	7.38216e-89	8.32194e-89	down	yes	PIGB	protein_coding	chrNC_010443.5:116492910-116519673:-
gene11640	531	7.14104	71	0.941802	7.58232	2.92264	1.20586e-88	1.35578e-88	up	yes	DHRS3	protein_coding	chrNC_010448.4:72556234-72599233:-
gene2858	1110	14.9276	2283	30.2836	0.492927	-1.02055	1.28192e-88	1.44076e-88	down	yes	TMEM109	protein_coding	chrNC_010444.4:10828644-10837124:-
gene26194	871	11.7135	1933	25.6409	0.456827	-1.13028	1.33674e-88	1.50068e-88	down	yes	MRGBP	protein_coding	chrNC_010459.5:62058401-62062962:+
gene4454	584	7.8538	1491	19.7778	0.397101	-1.33242	1.51303e-88	1.69732e-88	down	yes	ENC1	protein_coding	chrNC_010444.4:83678518-83691812:-
gene1000	1377	18.5183	533	7.07014	2.61922	1.38914	2.29411e-88	2.56966e-88	up	yes	LCMT2	protein_coding	chrNC_010443.5:128125674-128131064:+
gene23600	527	7.08725	1397	18.5309	0.382455	-1.38664	3.45109e-88	3.86125e-88	down	yes	PLEKHA1	protein_coding	chrNC_010456.5:131960932-132016664:+
gene5236	647	8.70104	1583	20.9982	0.414371	-1.27101	2.07761e-87	2.31585e-87	down	yes	SMURF1	protein_coding	chrNC_010445.4:6037732-6142569:-
gene19737	433	5.82311	1236	16.3953	0.355169	-1.49342	3.08228e-87	3.42933e-87	down	yes	SPAG5	protein_coding	chrNC_010454.4:44827947-44848527:-
gene4261	1161	15.6135	404	5.35898	2.91351	1.54276	3.71936e-87	4.1366e-87	up	yes	LOC110259374	protein_coding	chrNC_010444.4:76648079-76651850:-
gene10897	897	12.0631	252	3.34273	3.60876	1.8515	3.82002e-87	4.24697e-87	up	yes	TRAPPC6A	protein_coding	chrNC_010448.4:51578906-51589496:-
gene26901	481	6.46863	1314	17.43	0.371121	-1.43004	6.21294e-87	6.89448e-87	down	yes	RARRES2	protein_coding	chrNC_010460.4:55903693-55906976:-
gene24439	1025	13.7845	325	4.31106	3.19747	1.67693	8.64416e-87	9.57815e-87	up	yes	FAM117B	protein_coding	chrNC_010457.5:106183217-106284318:+
gene27775	696	9.36001	1651	21.9002	0.427394	-1.22636	3.1953e-86	3.53007e-86	down	yes	GRIA3	protein_coding	chrNC_010461.5:100827293-101109213:+
gene10668	877	11.7941	245	3.24988	3.6291	1.85961	9.70212e-86	1.06712e-85	up	yes	ZNF568	protein_coding	chrNC_010448.4:46093193-46121506:-
gene7111	260	3.49655	922	12.2302	0.285896	-1.80644	1.83016e-85	2.00926e-85	down	yes	FBXO32	protein_coding	chrNC_010446.5:15895875-15925929:+
gene2787	2004	26.9504	967	12.8271	2.10105	1.07111	1.96461e-85	2.15448e-85	up	yes	BSCL2	protein_coding	chrNC_010444.4:9052676-9064890:+
gene27605	420	5.64828	1203	15.9576	0.353956	-1.49836	2.29207e-85	2.51082e-85	down	yes	ARMCX2	protein_coding	chrNC_010461.5:83213939-83218601:-
gene10649	1056	14.2014	2177	28.8775	0.491781	-1.02391	4.84748e-85	5.30428e-85	down	yes	POLR2I	protein_coding	chrNC_010448.4:45480785-45482318:-
gene5441	851	11.4445	1874	24.8583	0.46039	-1.11907	1.28862e-84	1.40747e-84	down	yes	CLIP2	protein_coding	chrNC_010445.4:11419446-11505417:+
gene26990	789	10.6107	201	2.66623	3.97967	1.99265	1.33045e-84	1.45263e-84	up	yes	ACE2	protein_coding	chrNC_010461.5:12099849-12152204:-
gene23068	2212	29.7476	1120	14.8566	2.00232	1.00167	1.68512e-84	1.83785e-84	up	yes	POLR3A	protein_coding	chrNC_010456.5:80410143-80471740:-
gene13388	1105	14.8604	2242	29.7397	0.499681	-1.00092	2.24184e-84	2.44324e-84	down	yes	PRIM2	protein_coding	chrNC_010449.5:28274626-28566633:-
gene24251	955	12.8431	2025	26.8612	0.478128	-1.06453	2.52197e-84	2.74553e-84	down	yes	WIPF1	protein_coding	chrNC_010457.5:80521032-80646462:-
gene21835	1499	20.159	629	8.34357	2.41611	1.27269	3.6781e-84	4.00123e-84	up	yes	ADAMTS1	protein_coding	chrNC_010455.5:190277175-190285957:-
gene11549	2066	27.7842	1019	13.5168	2.05552	1.0395	6.65427e-84	7.23622e-84	up	yes	GPR153	protein_coding	chrNC_010448.4:67136992-67149319:-
gene1083	1678	22.5662	750	9.94861	2.26828	1.1816	8.05783e-84	8.75295e-84	up	yes	GPR176	protein_coding	chrNC_010443.5:131355332-131494967:+
gene13242	1042	14.0131	2147	28.4795	0.492041	-1.02315	8.55056e-84	9.28482e-84	down	yes	FLOT1	protein_coding	chrNC_010449.5:23253157-23265165:-
gene8558	424	5.70207	1200	15.9178	0.358221	-1.48108	9.74552e-84	1.05785e-83	down	yes	SYDE2	protein_coding	chrNC_010446.5:130702340-130749742:+
gene2801	1726	23.2117	785	10.4129	2.22914	1.15649	2.51681e-83	2.72007e-83	up	yes	TUT1	protein_coding	chrNC_010444.4:9148563-9161918:+
gene17566	2060	27.7035	1018	13.5036	2.05157	1.03672	2.62761e-83	2.83776e-83	up	yes	TGFB2	protein_coding	chrNC_010452.4:8306136-8435307:+
gene27637	175	2.35345	747	9.90881	0.237511	-2.07394	3.08392e-83	3.32936e-83	down	yes	TCEAL1	protein_coding	chrNC_010461.5:84518999-84521020:+
gene2429	1822	24.5028	852	11.3016	2.16808	1.11642	4.02625e-83	4.3404e-83	up	yes	SIRT3	protein_coding	chrNC_010444.4:38465-55074:-
gene25237	789	10.6107	1768	23.4522	0.45244	-1.1442	8.95616e-83	9.60984e-83	down	yes	SPDL1	protein_coding	chrNC_010458.4:54276943-54303465:-
gene22152	1878	25.2559	894	11.8587	2.12973	1.09067	1.61915e-82	1.73296e-82	up	yes	ADAMDEC1	protein_coding	chrNC_010456.5:8455964-8483308:+
gene3372	2062	27.7304	1024	13.5832	2.04152	1.02965	1.78663e-82	1.90811e-82	up	yes	RNF187	protein_coding	chrNC_010444.4:51647478-51692453:-
gene11420	1622	21.8131	719	9.5374	2.28711	1.19353	2.32574e-82	2.48299e-82	up	yes	ZNF671	protein_coding	chrNC_010448.4:62496310-62517124:+
gene1248	691	9.29277	157	2.08258	4.46215	2.15774	4.17372e-82	4.44637e-82	up	yes	SERPINB5	protein_coding	chrNC_010443.5:158167756-158195896:-
gene13390	140	1.88276	667	8.84763	0.212798	-2.23244	1.48816e-81	1.58086e-81	down	yes	BAG2	protein_coding	chrNC_010449.5:28668587-28680497:-
gene20546	1906	25.6324	919	12.1904	2.10268	1.07223	1.75205e-81	1.86052e-81	up	yes	CCDC71	protein_coding	chrNC_010455.5:31763802-31771260:-
gene23343	1658	22.2973	748	9.92208	2.24724	1.16815	2.2133e-81	2.34866e-81	up	yes	MMS19	protein_coding	chrNC_010456.5:108853038-108886587:-
gene10183	511	6.87207	1328	17.6157	0.390111	-1.35804	2.31597e-81	2.45674e-81	down	yes	LOC100522551	protein_coding	chrNC_010448.4:12166178-12188165:+
rna78614	1592	21.4097	704	9.33843	2.29264	1.19701	3.08396e-81	3.26792e-81	up	yes	rna78614	protein_coding	chrNC_000845.1:8135-8202:+
gene2110	789	10.6107	1753	23.2532	0.456311	-1.13191	1.04026e-80	1.09802e-80	down	yes	CDK5RAP2	protein_coding	chrNC_010443.5:260465809-260648070:-
gene6722	1695	22.7948	780	10.3466	2.20313	1.13956	5.37875e-80	5.64547e-80	up	yes	KHK	protein_coding	chrNC_010445.4:112021163-112031615:-
gene23518	1182	15.8959	443	5.87631	2.70508	1.43567	6.58107e-80	6.89528e-80	up	yes	TCF7L2	protein_coding	chrNC_010456.5:123343695-123547332:+
gene17286	1345	18.0879	547	7.25585	2.49288	1.31781	8.28639e-80	8.67289e-80	up	yes	METTL13	protein_coding	chrNC_010451.4:114202494-114218371:+
gene13565	1071	14.4031	376	4.98757	2.8878	1.52997	1.36345e-79	1.42505e-79	up	yes	PEX6	protein_coding	chrNC_010449.5:38039852-38052384:-
gene6573	412	5.54069	1155	15.3209	0.361644	-1.46736	1.38796e-79	1.44964e-79	down	yes	MTA3	protein_coding	chrNC_010445.4:97601403-97782868:-
gene23643	1825	24.5431	873	11.5802	2.11941	1.08366	1.99639e-79	2.08293e-79	up	yes	EDRF1	protein_coding	chrNC_010456.5:135042082-135085552:+
gene25922	1668	22.4317	765	10.1476	2.21055	1.14441	2.81591e-79	2.93387e-79	up	yes	CHD6	protein_coding	chrNC_010459.5:44048056-44265472:-
gene19787	331	4.45138	10	0.132648	33.5578	5.06858	3.32998e-79	3.46705e-79	up	yes	TUSC5	protein_coding	chrNC_010454.4:46623712-46634115:-
gene25677	309	4.15552	974	12.9199	0.321637	-1.6365	9.61465e-79	9.96176e-79	down	yes	ADAM33	protein_coding	chrNC_010459.5:32023102-32038464:+
gene12210	1791	24.0859	854	11.3281	2.1262	1.08828	1.65223e-78	1.70714e-78	up	yes	TAF4B	protein_coding	chrNC_010448.4:110855636-110972798:+
gene15391	1200	16.1379	460	6.10181	2.64478	1.40315	2.09222e-78	2.15876e-78	up	yes	EDNRA	protein_coding	chrNC_010450.4:81210750-81279053:-
gene10696	292	3.9269	939	12.4557	0.31527	-1.66534	7.46832e-78	7.674e-78	down	yes	C6H19orf33	protein_coding	chrNC_010448.4:47223077-47224230:+
gene9413	1534	20.6297	681	9.03334	2.28373	1.19139	8.88856e-78	9.11765e-78	up	yes	KCNJ8	protein_coding	chrNC_010447.5:51695927-51704402:+
gene11600	660	8.87587	1537	20.388	0.435347	-1.19976	1.00111e-77	1.02621e-77	down	yes	APITD1	protein_coding	chrNC_010448.4:70700802-70711719:+
rna78617	1688	22.7007	787	10.4394	2.17452	1.1207	1.29849e-77	1.32967e-77	up	yes	rna78617	protein_coding	chrNC_000845.1:11000-11068:+
gene22881	1757	23.6286	835	11.0761	2.1333	1.09308	1.35912e-77	1.39128e-77	up	yes	ZNF248	protein_coding	chrNC_010456.5:61047835-61065534:+
gene62	443	5.95759	54	0.7163	8.31717	3.05609	1.88113e-77	1.92366e-77	up	yes	PRKN	protein_coding	chrNC_010443.5:5698508-6731132:+
gene29041	1074	14.4435	386	5.12022	2.82087	1.49614	2.79494e-77	2.85324e-77	up	yes	LETMD1	protein_coding	chrNW_018085018.1:313657-325168:-
gene11263	1037	13.9459	364	4.82839	2.88831	1.53022	3.83207e-77	3.908e-77	up	yes	LENG8	protein_coding	chrNC_010448.4:58860193-58871138:-
gene2550	220	2.95862	803	10.6516	0.277762	-1.84808	5.57643e-77	5.66755e-77	down	yes	LOC110259229	protein_coding	chrNC_010444.4:4123786-4132938:+
gene2795	1888	25.3904	931	12.3495	2.05598	1.03982	7.10634e-77	7.20773e-77	up	yes	INTS5	protein_coding	chrNC_010444.4:9095646-9100487:+
gene13217	1268	17.0524	510	6.76505	2.52066	1.3338	1.00392e-76	1.01756e-76	up	yes	TRIM26	protein_coding	chrNC_010449.5:22757794-22767662:-
gene22776	1927	25.9148	962	12.7607	2.03082	1.02207	2.74174e-76	2.76957e-76	up	yes	TRMT2A	protein_coding	chrNC_010456.5:51489889-51494204:-
gene24646	1501	20.1859	668	8.86089	2.27809	1.18782	8.59874e-76	8.65669e-76	up	yes	IRS1	protein_coding	chrNC_010457.5:128245846-128307321:-
gene24587	413	5.55414	45	0.596917	9.30472	3.21796	9.83538e-76	9.89833e-76	up	yes	TUBA4A	protein_coding	chrNC_010457.5:121290149-121294048:-
gene12460	255	3.42931	860	11.4077	0.300613	-1.73402	1.52012e-75	1.52778e-75	down	yes	JUN	protein_coding	chrNC_010448.4:153686425-153687635:+
gene11092	137	1.84242	632	8.38336	0.21977	-2.18593	1.94967e-75	1.95885e-75	down	yes	FAM71E1	protein_coding	chrNC_010448.4:55310616-55316269:-
gene6203	1839	24.7314	905	12.0047	2.06015	1.04275	2.88998e-75	2.90163e-75	up	yes	KANSL3	protein_coding	chrNC_010445.4:56959183-57011242:+
gene23277	763	10.261	1673	22.192	0.462375	-1.11286	4.40005e-75	4.40888e-75	down	yes	CEP55	protein_coding	chrNC_010456.5:104957256-104980690:+
gene18491	855	11.4983	264	3.50191	3.28343	1.7152	5.30402e-75	5.30931e-75	up	yes	KBTBD7	protein_coding	chrNC_010453.5:25643661-25647662:+
gene13304	608	8.17656	133	1.76422	4.63466	2.21246	1.05951e-74	1.05809e-74	up	yes	C2	protein_coding	chrNC_010449.5:24020590-24034042:+
gene2525	678	9.11794	169	2.24175	4.06732	2.02408	1.975e-74	1.97102e-74	up	yes	NADSYN1	protein_coding	chrNC_010444.4:2334793-2372356:-
gene12260	340	4.57242	1002	13.2913	0.344015	-1.53946	3.01765e-74	3.00855e-74	down	yes	INO80C	protein_coding	chrNC_010448.4:119262488-119285852:-
gene28028	834	11.2159	1767	23.4389	0.478515	-1.06336	1.08161e-73	1.07512e-73	down	yes	IRAK1	protein_coding	chrNC_010461.5:124717604-124724855:-
gene1010	1253	16.8507	513	6.80485	2.47628	1.30817	1.16853e-73	1.16036e-73	up	yes	CDAN1	protein_coding	chrNC_010443.5:128641411-128655556:+
gene13405	502	6.75104	1263	16.7535	0.402964	-1.31128	1.65949e-73	1.64679e-73	down	yes	KIFC1	protein_coding	chrNC_010449.5:29692775-29713716:+
gene19120	277	3.72518	888	11.7792	0.316252	-1.66086	1.88402e-73	1.86711e-73	down	yes	LOC110256160	protein_coding	chrNC_010454.4:16255019-16257503:+
gene29289	1023	13.7576	369	4.89472	2.8107	1.49093	2.4972e-73	2.47397e-73	up	yes	LOC102166678	protein_coding	chrNW_018085123.1:235-82645:-
gene19797	1181	15.8824	468	6.20793	2.55841	1.35525	2.57511e-73	2.55031e-73	up	yes	FAM57A	protein_coding	chrNC_010454.4:47116523-47125523:-
gene18603	1583	21.2886	736	9.7629	2.18056	1.1247	2.60311e-73	2.57718e-73	up	yes	GPC6	protein_coding	chrNC_010453.5:62436143-63560908:+
gene5798	764	10.2745	1661	22.0329	0.466326	-1.10059	2.88508e-73	2.85445e-73	down	yes	VASN	protein_coding	chrNC_010445.4:37961425-37972477:-
gene25142	463	6.22656	1198	15.8912	0.391823	-1.35173	4.52122e-73	4.46433e-73	down	yes	CENPH	protein_coding	chrNC_010458.4:47353319-47378746:+
gene3645	751	10.0997	212	2.81214	3.59145	1.84457	6.64544e-73	6.55315e-73	up	yes	BST2	protein_coding	chrNC_010444.4:60305306-60308295:+
gene4097	627	8.43207	148	1.96319	4.29508	2.10269	2.43675e-72	2.39263e-72	up	yes	PEX11G	protein_coding	chrNC_010444.4:71639289-71649445:+
gene12651	345	4.63966	999	13.2515	0.350122	-1.51407	2.75398e-72	2.70323e-72	down	yes	SLC6A9	protein_coding	chrNC_010448.4:167267193-167301598:+
gene22594	512	6.88552	1270	16.8463	0.408726	-1.29079	3.61857e-72	3.54955e-72	down	yes	HSCB	protein_coding	chrNC_010456.5:45967460-45980632:+
gene26118	664	8.92966	1503	19.937	0.447894	-1.15877	4.68017e-72	4.58487e-72	down	yes	AURKA	protein_coding	chrNC_010459.5:56954838-56972435:-
gene6403	1130	15.1966	442	5.86305	2.59192	1.37402	1.10841e-71	1.08406e-71	up	yes	CEP68	protein_coding	chrNC_010445.4:76869350-76932673:-
gene1354	849	11.4176	1773	23.5185	0.485473	-1.04254	1.21276e-71	1.18534e-71	down	yes	LARP6	protein_coding	chrNC_010443.5:168508472-168530439:-
gene1805	680	9.14483	1524	20.2156	0.452366	-1.14444	1.24071e-71	1.21226e-71	down	yes	RFK	protein_coding	chrNC_010443.5:229330457-229337077:-
gene25966	300	4.03449	10	0.132648	30.4149	4.92671	1.97808e-71	1.92831e-71	up	yes	SLPI	protein_coding	chrNC_010459.5:47595804-47598364:-
gene13733	1023	13.7576	376	4.98757	2.75838	1.46382	2.10157e-71	2.04802e-71	up	yes	MESDC1	protein_coding	chrNC_010449.5:49833640-49835735:+
gene11146	550	7.39656	1323	17.5493	0.421472	-1.24649	3.22813e-71	3.14279e-71	down	yes	MYADM	protein_coding	chrNC_010448.4:56236306-56278577:-
gene19103	1467	19.7286	668	8.86089	2.22648	1.15477	6.12913e-71	5.95157e-71	up	yes	MAP3K3	protein_coding	chrNC_010454.4:15228979-15298784:-
gene13298	1424	19.1504	640	8.48948	2.25578	1.17362	1.13667e-70	1.10195e-70	up	yes	HSP70.2	protein_coding	chrNC_010449.5:23925929-23927854:+
gene1349	1692	22.7545	826	10.9567	2.07676	1.05433	1.24727e-70	1.208e-70	up	yes	TLE3	protein_coding	chrNC_010443.5:167808508-167855913:-
gene24567	420	5.64828	56	0.742829	7.60374	2.92671	1.3294e-70	1.28712e-70	up	yes	CYP27A1	protein_coding	chrNC_010457.5:120809886-120852196:+
gene2521	235	3.16035	796	10.5588	0.29931	-1.74029	2.08954e-70	2.01916e-70	down	yes	OSBPL5	protein_coding	chrNC_010444.4:2201615-2261946:-
gene25890	1394	18.7469	622	8.25071	2.27216	1.18406	3.54261e-70	3.41222e-70	up	yes	TTI1	protein_coding	chrNC_010459.5:41047408-41094038:-
gene3656	875	11.7672	291	3.86006	3.04846	1.60808	3.82416e-70	3.68104e-70	up	yes	OCEL1	protein_coding	chrNC_010444.4:60442203-60445016:-
gene3987	657	8.83552	1478	19.6054	0.450668	-1.14986	4.84158e-70	4.65737e-70	down	yes	S1PR2	protein_coding	chrNC_010444.4:69050396-69057270:-
gene10936	1148	15.4386	461	6.11508	2.52468	1.3361	8.06195e-70	7.73526e-70	up	yes	CCDC61	protein_coding	chrNC_010448.4:52294518-52318006:+
gene15610	1660	22.3242	808	10.718	2.08287	1.05857	8.96872e-70	8.60253e-70	up	yes	LOC100518620	protein_coding	chrNC_010450.4:114016915-114035905:-
gene23356	817	10.9872	259	3.43559	3.19807	1.6772	1.41832e-69	1.35735e-69	up	yes	CRTAC1	protein_coding	chrNC_010456.5:109237182-109390832:-
gene13305	437	5.8769	65	0.862213	6.81607	2.76894	1.76466e-69	1.68827e-69	up	yes	CFB	protein_coding	chrNC_010449.5:24034077-24040523:+
gene9485	517	6.95276	1259	16.7004	0.416323	-1.26422	2.44856e-69	2.33656e-69	down	yes	MANSC1	protein_coding	chrNC_010447.5:60082414-60098111:+
gene6923	1352	18.1821	598	7.93236	2.29214	1.1967	3.0335e-69	2.89198e-69	up	yes	C4H8orf82	protein_coding	chrNC_010446.5:275644-278548:+
gene17358	1298	17.4559	562	7.45482	2.34155	1.22747	3.35498e-69	3.19744e-69	up	yes	QSOX1	protein_coding	chrNC_010451.4:121779072-121822829:+
gene22019	856	11.5117	287	3.807	3.02383	1.59638	5.84402e-68	5.52198e-68	up	yes	PDXK	protein_coding	chrNC_010455.5:206676905-206699047:+
gene2267	648	8.71449	171	2.26828	3.84189	1.94182	1.52693e-67	1.43642e-67	up	yes	FPGS	protein_coding	chrNC_010443.5:268281298-268309397:+
gene15108	751	10.0997	1598	21.1972	0.476463	-1.06956	1.93112e-67	1.81437e-67	down	yes	C8H4orf46	protein_coding	chrNC_010450.4:47604756-47608549:-
gene13770	1482	19.9304	696	9.23231	2.15876	1.1102	2.28825e-67	2.14855e-67	up	yes	ZNF592	protein_coding	chrNC_010449.5:52731690-52793950:-
gene19651	1461	19.6479	682	9.0466	2.17186	1.11893	2.92876e-67	2.74477e-67	up	yes	RASL10B	protein_coding	chrNC_010454.4:39783725-39795283:-
gene23308	293	3.94035	880	11.673	0.33756	-1.56678	4.33565e-67	4.05818e-67	down	yes	PDLIM1	protein_coding	chrNC_010456.5:106744320-106793606:-
gene3657	869	11.6866	1764	23.3991	0.499444	-1.0016	7.37371e-67	6.88885e-67	down	yes	USE1	protein_coding	chrNC_010444.4:60450424-60454070:-
gene11748	1376	18.5048	628	8.3303	2.22139	1.15146	2.3414e-66	2.17518e-66	up	yes	ECE1	protein_coding	chrNC_010448.4:79408322-79465827:-
gene21962	404	5.43311	1060	14.0607	0.386404	-1.37182	2.64147e-66	2.45166e-66	down	yes	SH3BGR	protein_coding	chrNC_010455.5:203046575-203108638:+
gene7298	799	10.7452	259	3.43559	3.12761	1.64506	2.78118e-66	2.57972e-66	up	yes	CCNE2	protein_coding	chrNC_010446.5:41802090-41821870:+
gene18003	1347	18.1148	610	8.09153	2.23874	1.16269	5.51918e-66	5.09879e-66	up	yes	MCM10	protein_coding	chrNC_010452.4:48481292-48523921:-
rna78616	1322	17.7786	594	7.8793	2.25637	1.17401	8.9538e-66	8.24882e-66	up	yes	rna78616	protein_coding	chrNC_000845.1:10584-10652:+
gene25866	1393	18.7335	643	8.52927	2.19637	1.13512	1.12809e-65	1.03735e-65	up	yes	TGIF2	protein_coding	chrNC_010459.5:39840649-39858162:+
gene27580	1268	17.0524	558	7.40176	2.30383	1.20404	1.13258e-65	1.04116e-65	up	yes	PCDH19	protein_coding	chrNC_010461.5:82031365-82153159:-
gene7388	517	6.95276	1234	16.3688	0.424758	-1.23529	1.21862e-65	1.11853e-65	down	yes	TPD52	protein_coding	chrNC_010446.5:56472992-56603616:+
gene19831	371	4.98931	999	13.2515	0.376508	-1.40925	3.95742e-65	3.6168e-65	down	yes	SRR	protein_coding	chrNC_010454.4:48386915-48407917:+
gene19322	559	7.51759	131	1.73769	4.3262	2.1131	4.32483e-65	3.95017e-65	up	yes	KRT10	protein_coding	chrNC_010454.4:21641263-21645642:+
gene26064	1012	13.6097	394	5.22634	2.60405	1.38076	7.40019e-65	6.73437e-65	up	yes	SNAI1	protein_coding	chrNC_010459.5:51546446-51552498:+
gene7774	1635	21.9879	819	10.8639	2.02395	1.01717	1.63591e-64	1.486e-64	up	yes	PIGM	protein_coding	chrNC_010446.5:90461507-90464500:+
gene6971	1453	19.5404	693	9.19251	2.12568	1.08793	5.19936e-64	4.69859e-64	up	yes	ZNF623	protein_coding	chrNC_010446.5:928786-950910:-
gene10220	484	6.50897	1171	15.5331	0.419039	-1.25484	6.80814e-64	6.14499e-64	down	yes	MTSS1L	protein_coding	chrNC_010448.4:13660388-13682311:-
gene10218	1339	18.0073	615	8.15786	2.20735	1.14232	7.97102e-64	7.18373e-64	up	yes	IL34	protein_coding	chrNC_010448.4:13588748-13679864:+
gene9713	1233	16.5817	543	7.20279	2.30213	1.20297	8.0024e-64	7.20984e-64	up	yes	CPNE8	protein_coding	chrNC_010447.5:70391854-70660213:-
gene7364	555	7.4638	1279	16.9657	0.439935	-1.18464	9.85843e-64	8.874e-64	down	yes	LOC100152714	protein_coding	chrNC_010446.5:51406755-51468971:-
gene16578	1553	20.8852	766	10.1608	2.05546	1.03946	1.57841e-63	1.41823e-63	up	yes	BACE1	protein_coding	chrNC_010451.4:44640389-44665863:-
gene22919	668	8.98345	195	2.58664	3.47302	1.79619	8.58398e-63	7.65981e-63	up	yes	ZNF365	protein_coding	chrNC_010456.5:65861398-65888341:+
gene23980	1108	14.9007	465	6.16814	2.41575	1.27247	1.1169e-62	9.95166e-63	up	yes	LRP2BP	protein_coding	chrNC_010457.5:46383433-46445688:-
gene22143	763	10.261	250	3.3162	3.09421	1.62957	1.50015e-62	1.33465e-62	up	yes	R3HCC1	protein_coding	chrNC_010456.5:7419558-7434938:+
gene3609	21	0.282414	298	3.95291	0.0714445	-3.80703	7.41182e-62	6.54921e-62	down	yes	GDF15	protein_coding	chrNC_010444.4:59409035-59411356:-
gene3598	1185	15.9362	520	6.8977	2.31037	1.20812	8.16654e-62	7.21397e-62	up	yes	TMEM59L	protein_coding	chrNC_010444.4:59211404-59223017:-
gene13622	1337	17.9804	624	8.27724	2.17226	1.1192	9.90828e-62	8.74477e-62	up	yes	CYP39A1	protein_coding	chrNC_010449.5:41345011-41425854:-
gene2813	257	3.45621	787	10.4394	0.331073	-1.59478	1.02992e-61	9.08707e-62	down	yes	RAB3IL1	protein_coding	chrNC_010444.4:9577334-9599988:+
gene2832	1286	17.2945	589	7.81297	2.21356	1.14637	1.03791e-61	9.15492e-62	up	yes	TKFC	protein_coding	chrNC_010444.4:10158183-10171452:-
gene11985	1407	18.9217	673	8.92722	2.11956	1.08376	1.14309e-61	1.00796e-61	up	yes	ZMYM6	protein_coding	chrNC_010448.4:91238923-91293534:-
gene428	685	9.21208	1457	19.3268	0.476647	-1.06901	1.33362e-61	1.17563e-61	down	yes	LOC100622980	protein_coding	chrNC_010443.5:53092006-53191216:+
gene23125	330	4.43793	35	0.464268	9.55898	3.25686	1.63987e-61	1.44431e-61	up	yes	ADIRF	protein_coding	chrNC_010456.5:87928721-87930935:+
gene27581	850	11.431	307	4.0723	2.80703	1.48904	3.95787e-61	3.47563e-61	up	yes	TNMD	protein_coding	chrNC_010461.5:82269323-82292083:+
gene13318	597	8.02863	161	2.13563	3.75936	1.91049	4.49506e-61	3.94505e-61	up	yes	AGPAT1	protein_coding	chrNC_010449.5:24205930-24208430:-
gene6024	550	7.39656	1251	16.5943	0.445729	-1.16576	7.55812e-61	6.6158e-61	down	yes	CARD19	protein_coding	chrNC_010445.4:42633006-42649682:+
gene6404	562	7.55794	1269	16.833	0.448994	-1.15523	7.77641e-61	6.80487e-61	down	yes	SLC1A4	protein_coding	chrNC_010445.4:76938102-76970519:-
gene15061	1013	13.6231	411	5.45184	2.49881	1.32124	8.40398e-61	7.34758e-61	up	yes	LOC100525350	protein_coding	chrNC_010450.4:42024352-42049209:+
gene12609	458	6.15931	1109	14.7107	0.418697	-1.25602	1.07803e-60	9.41693e-61	down	yes	MAST2	protein_coding	chrNC_010448.4:165406876-165620029:-
gene14533	1223	16.4473	551	7.30891	2.2503	1.17012	1.12746e-60	9.83718e-61	up	yes	ANGEL1	protein_coding	chrNC_010449.5:99929401-99959441:-
gene21411	1350	18.1552	639	8.47621	2.1419	1.09889	1.50301e-60	1.30947e-60	up	yes	XXYLT1	protein_coding	chrNC_010455.5:132066896-132269986:-
gene28536	188	2.52828	657	8.71498	0.290107	-1.78534	1.76923e-60	1.54052e-60	down	yes	LOC106506226	protein_coding	chrNW_018084872.1:11013-65129:-
gene10652	968	13.0179	384	5.09369	2.5557	1.35372	2.5232e-60	2.19573e-60	up	yes	COX7A1	protein_coding	chrNC_010448.4:45519225-45520721:-
gene23089	101	1.35828	485	6.43343	0.211128	-2.24381	3.61211e-60	3.13509e-60	down	yes	DYDC1	protein_coding	chrNC_010456.5:82177004-82197160:-
gene19881	332	4.46483	38	0.504063	8.85769	3.14693	4.58242e-60	3.97149e-60	up	yes	ASPA	protein_coding	chrNC_010454.4:49612845-49630303:+
gene15064	884	11.8883	332	4.40392	2.69948	1.43268	4.78218e-60	4.14341e-60	up	yes	LOC100620089	protein_coding	chrNC_010450.4:42178849-42207449:-
gene24406	588	7.90759	1302	17.2708	0.457859	-1.12702	5.13783e-60	4.44897e-60	down	yes	SGO2	protein_coding	chrNC_010457.5:104099378-104150723:+
gene28408	588	7.90759	1302	17.2708	0.457859	-1.12702	5.13783e-60	4.44897e-60	down	yes	AGPAT2	protein_coding	chrNW_018084833.1:1095782-1106471:+
gene2007	552	7.42345	1248	16.5545	0.448426	-1.15706	5.253e-60	4.54738e-60	down	yes	KLF4	protein_coding	chrNC_010443.5:248604817-248609574:-
gene1099	1205	16.2052	542	7.18953	2.254	1.17249	5.38358e-60	4.65908e-60	up	yes	MEIS2	protein_coding	chrNC_010443.5:134013642-134223013:+
gene14220	828	11.1352	299	3.96618	2.80753	1.4893	1.31028e-59	1.12871e-59	up	yes	ANG	protein_coding	chrNC_010449.5:78249479-78262846:-
gene3197	351	4.72035	932	12.3628	0.381819	-1.38904	1.32041e-59	1.13711e-59	down	yes	KIF18A	protein_coding	chrNC_010444.4:32244073-32331392:+
gene21427	1278	17.1869	595	7.89256	2.17761	1.12274	2.22333e-59	1.91082e-59	up	yes	CEP19	protein_coding	chrNC_010455.5:133420017-133428394:+
gene3651	613	8.2438	175	2.32134	3.55131	1.82835	3.75502e-59	3.22165e-59	up	yes	ABHD8	protein_coding	chrNC_010444.4:60380691-60388986:+
gene18821	929	12.4935	364	4.82839	2.5875	1.37156	4.21397e-59	3.61333e-59	up	yes	TSPAN10	protein_coding	chrNC_010454.4:1239824-1251235:-
gene23634	309	4.15552	859	11.3945	0.364696	-1.45523	5.96625e-59	5.10705e-59	down	yes	EEF1AKMT2	protein_coding	chrNC_010456.5:134134899-134154666:-
gene25769	967	13.0045	390	5.17328	2.51378	1.32986	1.0864e-58	9.27814e-59	up	yes	LOC110257420	protein_coding	chrNC_010459.5:35340499-35346090:+
gene23499	626	8.41863	1348	17.881	0.470815	-1.08677	1.24414e-58	1.06131e-58	down	yes	BBIP1	protein_coding	chrNC_010456.5:121327357-121348671:-
gene25026	391	5.25828	65	0.862213	6.09859	2.60848	1.27895e-58	1.0907e-58	up	yes	FST	protein_coding	chrNC_010458.4:32806341-32811382:+
gene23974	610	8.20345	1323	17.5493	0.467451	-1.09711	1.92852e-58	1.64091e-58	down	yes	CENPU	protein_coding	chrNC_010457.5:45818562-45851461:-
gene20496	574	7.71932	1268	16.8198	0.458943	-1.12361	3.20818e-58	2.72428e-58	down	yes	ELP6	protein_coding	chrNC_010455.5:30329815-30341952:-
gene927	867	11.6597	329	4.36412	2.67171	1.41776	4.92731e-58	4.17817e-58	up	yes	FAM227B	protein_coding	chrNC_010443.5:122139343-122373488:+
gene11959	259	3.48311	769	10.2006	0.34146	-1.55021	5.58233e-58	4.73091e-58	down	yes	TMEM54	protein_coding	chrNC_010448.4:89196995-89203954:-
gene24890	467	6.28035	1103	14.6311	0.429247	-1.22012	9.09681e-58	7.69843e-58	down	yes	MTMR12	protein_coding	chrNC_010458.4:18461120-18537893:-
gene11338	444	5.97104	1066	14.1403	0.422271	-1.24376	1.50924e-57	1.2747e-57	down	yes	ZNF444	protein_coding	chrNC_010448.4:60458007-60471159:+
gene1056	524	7.0469	1188	15.7586	0.447178	-1.16108	1.62225e-57	1.36976e-57	down	yes	DNAJC17	protein_coding	chrNC_010443.5:130516725-130559233:+
gene20812	1335	17.9535	649	8.60886	2.08546	1.06037	1.2685e-56	1.06206e-56	up	yes	BRPF1	protein_coding	chrNC_010455.5:66021047-66037446:+
gene26708	246	3.30828	736	9.7629	0.338862	-1.56123	3.96433e-56	3.30687e-56	down	yes	NOD1	protein_coding	chrNC_010460.4:42464667-42509135:+
gene3077	1350	18.1552	663	8.79457	2.06436	1.0457	5.44242e-56	4.52747e-56	up	yes	AMBRA1	protein_coding	chrNC_010444.4:15935354-16119082:+
gene18877	1224	16.4607	575	7.62727	2.15814	1.10979	6.33913e-56	5.2661e-56	up	yes	LOC110255953	protein_coding	chrNC_010454.4:3728742-3734209:+
gene25934	706	9.49449	1442	19.1279	0.49637	-1.01051	9.02967e-56	7.49494e-56	down	yes	MYBL2	protein_coding	chrNC_010459.5:46256245-46287929:+
gene25697	698	9.3869	234	3.10397	3.02416	1.59654	9.23575e-56	7.66387e-56	up	yes	PCED1A	protein_coding	chrNC_010459.5:32825984-32831045:+
gene20517	875	11.7672	343	4.54983	2.58631	1.37089	9.8768e-56	8.19353e-56	up	yes	ATRIP	protein_coding	chrNC_010455.5:31159849-31178716:+
gene9132	38	0.511035	320	4.24474	0.120393	-3.05418	1.10846e-55	9.18779e-56	down	yes	MYL6B	protein_coding	chrNC_010447.5:21554351-21558995:+
gene22481	993	13.3541	421	5.58449	2.39129	1.25779	2.20884e-55	1.8263e-55	up	yes	OAS2	protein_coding	chrNC_010456.5:38827667-38847697:-
gene14848	436	5.86345	1038	13.7689	0.425848	-1.23159	2.98368e-55	2.46081e-55	down	yes	LOC100525472	protein_coding	chrNC_010450.4:8251517-8254056:+
gene15918	930	12.5069	381	5.05389	2.47471	1.30726	4.36785e-55	3.59844e-55	up	yes	SMPD1	protein_coding	chrNC_010451.4:3324091-3328493:-
gene16570	432	5.80966	92	1.22036	4.7606	2.25114	1.01256e-54	8.29384e-55	up	yes	APOA1	protein_coding	chrNC_010451.4:44216481-44218360:-
gene18418	521	7.00656	1163	15.427	0.454176	-1.13868	1.14183e-54	9.34504e-55	down	yes	RB1	protein_coding	chrNC_010453.5:19186754-19317642:-
gene27877	780	10.4897	288	3.82027	2.74579	1.45722	1.60492e-54	1.31099e-54	up	yes	INTS6L	protein_coding	chrNC_010461.5:111011860-111072939:+
gene25901	398	5.35242	77	1.02139	5.24032	2.38966	3.64011e-54	2.96452e-54	up	yes	ADIG	protein_coding	chrNC_010459.5:41609367-41631142:+
gene4002	160	2.15173	569	7.54768	0.285084	-1.81054	1.30572e-53	1.05733e-53	down	yes	CDKN2D	protein_coding	chrNC_010444.4:69337428-69339998:-
gene22446	362	4.86828	911	12.0842	0.402862	-1.31164	1.49178e-53	1.207e-53	down	yes	VSIG10	protein_coding	chrNC_010456.5:34558160-34606892:+
gene19750	795	10.6914	301	3.99271	2.67773	1.42101	1.52684e-53	1.23504e-53	up	yes	ERAL1	protein_coding	chrNC_010454.4:45082931-45091278:+
gene7724	646	8.68759	1338	17.7483	0.489488	-1.03065	1.56421e-53	1.26492e-53	down	yes	TOMM40L	protein_coding	chrNC_010446.5:89230729-89235504:-
gene1917	642	8.6338	1330	17.6422	0.489383	-1.03096	3.00809e-53	2.424e-53	down	yes	TDRD7	protein_coding	chrNC_010443.5:239285628-239368558:+
gene9926	806	10.8393	310	4.11209	2.63596	1.39833	5.34778e-53	4.29662e-53	up	yes	SOCS2	protein_coding	chrNC_010447.5:89581081-89587424:-
rna78607	922	12.3993	386	5.12022	2.42164	1.27598	1.11571e-52	8.92322e-53	up	yes	rna78607	protein_coding	chrNC_000845.1:5017-5086:+
gene2467	1044	14.04	468	6.20793	2.26162	1.17736	1.48364e-52	1.18436e-52	up	yes	SLC25A22	protein_coding	chrNC_010444.4:491288-498773:-
gene22867	443	5.95759	1030	13.6628	0.436046	-1.19745	1.54802e-52	1.23517e-52	down	yes	CCSAP	protein_coding	chrNC_010456.5:60445052-60465761:+
gene1795	665	8.94311	1357	18.0003	0.49683	-1.00918	1.76936e-52	1.41056e-52	down	yes	C1H9orf40	protein_coding	chrNC_010443.5:228038184-228045225:-
gene845	653	8.78173	1337	17.7351	0.495162	-1.01403	3.96612e-52	3.14672e-52	down	yes	CCNB2	protein_coding	chrNC_010443.5:112907047-112942218:-
gene14859	606	8.14966	1268	16.8198	0.484528	-1.04535	5.61459e-52	4.4487e-52	down	yes	CC2D2A	protein_coding	chrNC_010450.4:10779206-10898189:+
gene115	1189	15.99	571	7.57421	2.11111	1.078	5.87012e-52	4.64993e-52	up	yes	TMEM242	protein_coding	chrNC_010443.5:9667865-9718226:+
gene13317	337	4.53207	54	0.7163	6.32706	2.66154	7.41157e-52	5.86474e-52	up	yes	EGFL8	protein_coding	chrNC_010449.5:24201129-24205133:+
gene24286	561	7.54449	1201	15.931	0.473572	-1.07835	8.47102e-52	6.69776e-52	down	yes	PRKRA	protein_coding	chrNC_010457.5:84134273-84156596:-
gene23057	283	3.80586	765	10.1476	0.375051	-1.41484	1.37219e-50	1.0702e-50	down	yes	COMTD1	protein_coding	chrNC_010456.5:77783064-77786871:-
gene6003	261	3.51	727	9.64352	0.363975	-1.45809	2.60462e-50	2.0261e-50	down	yes	RHBDF1	protein_coding	chrNC_010445.4:41548440-41567596:+
gene6940	842	11.3235	344	4.5631	2.48153	1.31123	2.85812e-50	2.21982e-50	up	yes	FBXL6	protein_coding	chrNC_010446.5:424433-427799:+
gene25897	1297	17.4424	657	8.71498	2.00143	1.00103	2.96485e-50	2.30212e-50	up	yes	LOC110257391	protein_coding	chrNC_010459.5:41476092-41484618:-
gene10052	727	9.7769	271	3.59476	2.71976	1.44348	3.0241e-50	2.34752e-50	up	yes	GALNS	protein_coding	chrNC_010448.4:869284-890137:+
gene2254	721	9.69621	268	3.55497	2.72751	1.44758	4.73797e-50	3.66649e-50	up	yes	SLC2A8	protein_coding	chrNC_010443.5:267925184-267934096:+
gene1325	122	1.64069	478	6.34058	0.25876	-1.95031	6.4749e-50	5.00283e-50	down	yes	C1H15orf61	protein_coding	chrNC_010443.5:165436810-165441736:+
gene4067	821	11.041	332	4.40392	2.5071	1.32602	6.92121e-50	5.34491e-50	up	yes	CERS4	protein_coding	chrNC_010444.4:71004418-71047968:-
gene11992	1123	15.1024	536	7.10994	2.12413	1.08687	8.29182e-50	6.40005e-50	up	yes	NCDN	protein_coding	chrNC_010448.4:91747550-91756812:+
gene4940	881	11.8479	372	4.93451	2.40104	1.26366	1.1e-49	8.48156e-50	up	yes	CD14	protein_coding	chrNC_010444.4:142348036-142349686:-
gene6237	774	10.409	304	4.0325	2.58127	1.36808	2.34351e-49	1.7963e-49	up	yes	ATOH8	protein_coding	chrNC_010445.4:58964541-59001620:-
gene14601	1087	14.6183	516	6.84464	2.13573	1.09473	8.16683e-49	6.2215e-49	up	yes	NRDE2	protein_coding	chrNC_010449.5:112039949-112090632:-
gene9645	548	7.36966	1159	15.3739	0.479361	-1.06081	8.88926e-49	6.77012e-49	down	yes	AKAP3	protein_coding	chrNC_010447.5:65788744-65816031:+
gene20981	1085	14.5914	515	6.83138	2.13594	1.09487	9.74421e-49	7.41558e-49	up	yes	CEP70	protein_coding	chrNC_010455.5:79305678-79386946:-
gene19166	949	12.7624	422	5.59775	2.27992	1.18898	1.16052e-48	8.82058e-49	up	yes	DCAKD	protein_coding	chrNC_010454.4:18337654-18363717:+
gene4156	1130	15.1966	547	7.25585	2.09439	1.06653	1.2083e-48	9.18142e-49	up	yes	UHRF1	protein_coding	chrNC_010444.4:73898061-73937727:-
gene17447	147	1.9769	518	6.87117	0.287709	-1.79732	1.71311e-48	1.29875e-48	down	yes	BATF3	protein_coding	chrNC_010451.4:130699092-130711719:+
gene23842	987	13.2735	449	5.9559	2.22862	1.15615	2.06702e-48	1.56428e-48	up	yes	STEAP3	protein_coding	chrNC_010457.5:24736556-24785376:+
gene14012	378	5.08345	901	11.9516	0.425337	-1.23332	2.67948e-48	2.02418e-48	down	yes	PRKD1	protein_coding	chrNC_010449.5:69527743-69872374:+
gene9616	686	9.22552	253	3.356	2.74897	1.45889	3.02781e-48	2.28616e-48	up	yes	IFFO1	protein_coding	chrNC_010447.5:64115695-64129832:+
gene13745	215	2.89138	637	8.44968	0.342188	-1.54714	3.35762e-48	2.53263e-48	down	yes	SH3GL3	protein_coding	chrNC_010449.5:51381091-51514253:-
gene10471	1232	16.5683	622	8.25071	2.0081	1.00583	3.43402e-48	2.5896e-48	up	yes	FTO	protein_coding	chrNC_010448.4:31177112-31564674:-
gene8200	1236	16.6221	625	8.29051	2.00495	1.00357	3.61569e-48	2.72591e-48	up	yes	FAM46C	protein_coding	chrNC_010446.5:103131819-103154074:-
gene21581	890	11.969	385	5.10695	2.34366	1.22876	4.2757e-48	3.22137e-48	up	yes	NEPRO	protein_coding	chrNC_010455.5:146902010-146914755:+
gene14094	852	11.4579	361	4.7886	2.39276	1.25867	8.01113e-48	6.01536e-48	up	yes	HOMEZ	protein_coding	chrNC_010449.5:75789184-75798027:+
gene25948	196	2.63586	602	7.98542	0.330085	-1.59909	8.26379e-48	6.20351e-48	down	yes	PKIG	protein_coding	chrNC_010459.5:46933418-47044044:+
gene11638	996	13.3945	459	6.08855	2.19995	1.13747	1.26731e-47	9.4992e-48	up	yes	TNFRSF1B	protein_coding	chrNC_010448.4:72195420-72231146:+
gene17484	488	6.56276	139	1.84381	3.55935	1.83161	1.44241e-47	1.07981e-47	up	yes	HSD11B1	protein_coding	chrNC_010451.4:133231451-133278396:-
gene22769	886	11.9152	385	5.10695	2.33313	1.22227	1.6703e-47	1.24916e-47	up	yes	TXNRD2	protein_coding	chrNC_010456.5:51355731-51385096:-
gene13264	518	6.96621	1105	14.6576	0.475262	-1.0732	1.91636e-47	1.43138e-47	down	yes	SLA-7	protein_coding	chrNC_010449.5:23634731-23638722:-
gene11828	424	5.70207	106	1.40607	4.05533	2.01982	4.2011e-47	3.12307e-47	up	yes	TRIM63	protein_coding	chrNC_010448.4:83493200-83507471:-
gene9647	534	7.18138	1125	14.9229	0.481232	-1.0552	5.27051e-47	3.91026e-47	down	yes	RAD51AP1	protein_coding	chrNC_010447.5:65872277-65897210:-
gene16527	99	1.33138	418	5.54469	0.240118	-2.05818	6.14647e-47	4.55449e-47	down	yes	IL18	protein_coding	chrNC_010451.4:39839959-39861258:-
gene11854	582	7.8269	195	2.58664	3.0259	1.59736	7.97227e-47	5.90299e-47	up	yes	TRNP1	protein_coding	chrNC_010448.4:84293613-84300015:+
gene231	374	5.02966	82	1.08771	4.62406	2.20916	1.4426e-46	1.06499e-46	up	yes	PERP	protein_coding	chrNC_010443.5:26301254-26317046:+
gene14788	832	11.189	355	4.70901	2.37608	1.24858	3.53081e-46	2.59696e-46	up	yes	CPZ	protein_coding	chrNC_010450.4:2620765-2642524:-
gene19958	1167	15.6941	587	7.78644	2.01557	1.01119	3.961e-46	2.90906e-46	up	yes	PELP1	protein_coding	chrNC_010454.4:52177062-52229427:+
gene5986	915	12.3052	412	5.4651	2.25159	1.17095	6.77653e-46	4.95977e-46	up	yes	DECR2	protein_coding	chrNC_010445.4:41291038-41304044:-
gene4991	1042	14.0131	501	6.64567	2.10861	1.07629	1.2199e-45	8.89798e-46	up	yes	LOC100736974	protein_coding	chrNC_010444.4:143052861-143156556:+
gene7989	263	3.5369	701	9.29863	0.380368	-1.39453	1.54578e-45	1.12666e-45	down	yes	S100A1	protein_coding	chrNC_010446.5:96007026-96012305:-
gene10676	667	8.97001	252	3.34273	2.68344	1.42408	2.37933e-45	1.7321e-45	up	yes	LOC102164889	protein_coding	chrNC_010448.4:46375449-46436379:-
gene13672	424	5.70207	950	12.6016	0.452489	-1.14405	2.60982e-45	1.89943e-45	down	yes	EFHC1	protein_coding	chrNC_010449.5:46244915-46320261:+
gene13776	96	1.29104	404	5.35898	0.24091	-2.05343	2.69998e-45	1.96456e-45	down	yes	ZNF774	protein_coding	chrNC_010449.5:52985669-52994797:+
gene20767	1072	14.4166	524	6.95076	2.0741	1.05248	2.75601e-45	2.00484e-45	up	yes	GXYLT2	protein_coding	chrNC_010455.5:54205525-54302779:+
gene25389	395	5.31207	906	12.0179	0.442013	-1.17784	2.85944e-45	2.07958e-45	down	yes	IRX1	protein_coding	chrNC_010458.4:77695704-77701089:-
rna78605	800	10.7586	338	4.48351	2.3996	1.26279	3.11193e-45	2.26155e-45	up	yes	rna78605	protein_coding	chrNC_000845.1:4877-4945:+
gene11832	1046	14.0669	506	6.71199	2.09579	1.06749	3.18277e-45	2.31247e-45	up	yes	ZNF593	protein_coding	chrNC_010448.4:83590840-83593284:+
gene9464	423	5.68862	111	1.47239	3.86352	1.94992	5.93094e-45	4.29662e-45	up	yes	PLBD1	protein_coding	chrNC_010447.5:57950872-58022059:+
gene15711	444	5.97104	123	1.63157	3.65968	1.87172	1.10808e-44	7.99824e-45	up	yes	NAP1L5	protein_coding	chrNC_010450.4:130364566-130365464:+
gene1760	1063	14.2955	522	6.92423	2.06457	1.04584	1.78166e-44	1.282e-44	up	yes	FAM122A	protein_coding	chrNC_010443.5:222114314-222122337:+
gene2449	1020	13.7173	494	6.55282	2.09334	1.0658	4.9248e-44	3.52325e-44	up	yes	PTDSS2	protein_coding	chrNC_010444.4:256753-280803:+
gene6496	536	7.20828	179	2.3744	3.03583	1.60209	1.93052e-43	1.3719e-43	up	yes	CHAC2	protein_coding	chrNC_010445.4:87405937-87417268:-
gene15075	728	9.79035	300	3.97944	2.46023	1.29879	4.33541e-43	3.06995e-43	up	yes	CPE	protein_coding	chrNC_010450.4:43568744-43695475:-
rna78621	1097	14.7528	554	7.34871	2.00753	1.00542	4.47893e-43	3.17082e-43	up	yes	rna78621	protein_coding	chrNC_000845.1:15267-15335:-
gene3076	957	12.87	455	6.03549	2.13239	1.09247	4.75812e-43	3.36768e-43	up	yes	HARBI1	protein_coding	chrNC_010444.4:15916403-15927148:+
gene24904	164	2.20552	519	6.88444	0.320363	-1.64222	5.21008e-43	3.68406e-43	down	yes	C1QTNF3	protein_coding	chrNC_010458.4:20032973-20059905:-
gene10296	224	3.01242	23	0.305091	9.87384	3.30361	7.89495e-43	5.56277e-43	up	yes	LOC102166944	protein_coding	chrNC_010448.4:18660665-18662000:+
gene25125	441	5.93069	957	12.6944	0.467189	-1.09792	8.14649e-43	5.73865e-43	down	yes	SGTB	protein_coding	chrNC_010458.4:44184536-44225896:-
gene17408	252	3.38897	666	8.83436	0.383612	-1.38228	8.4907e-43	5.9783e-43	down	yes	SWT1	protein_coding	chrNC_010451.4:126347193-126453726:+
gene3257	734	9.87104	306	4.05903	2.43187	1.28207	1.33937e-42	9.41051e-43	up	yes	SAA3	protein_coding	chrNC_010444.4:41021349-41025950:+
gene15306	539	7.24863	184	2.44073	2.96987	1.5704	1.77735e-42	1.24761e-42	up	yes	NAAA	protein_coding	chrNC_010450.4:71573783-71603256:-
gene22343	944	12.6952	449	5.9559	2.13153	1.09189	1.87755e-42	1.31763e-42	up	yes	SCARB1	protein_coding	chrNC_010456.5:28301421-28393568:+
gene14579	403	5.41966	896	11.8853	0.455998	-1.1329	3.41198e-42	2.38493e-42	down	yes	GALC	protein_coding	chrNC_010449.5:109894576-109961407:-
gene11539	482	6.48207	1010	13.3975	0.483829	-1.04743	6.83774e-42	4.75167e-42	down	yes	C6H1orf174	protein_coding	chrNC_010448.4:65326980-65333891:-
gene10334	377	5.07	854	11.3281	0.447558	-1.15985	8.88262e-42	6.15406e-42	down	yes	MMP15	protein_coding	chrNC_010448.4:19890867-19912941:+
rna78604	856	11.5117	392	5.19981	2.21388	1.14658	1.10287e-41	7.6303e-42	up	yes	rna78604	protein_coding	chrNC_000845.1:3845-3919:+
gene17445	329	4.42449	779	10.3333	0.428178	-1.22372	1.66741e-41	1.1504e-41	down	yes	TATDN3	protein_coding	chrNC_010451.4:130579598-130622384:-
gene20003	144	1.93655	475	6.30079	0.307351	-1.70204	1.76231e-41	1.21476e-41	down	yes	TNFSF12	protein_coding	chrNC_010454.4:52843026-52853328:+
gene27459	248	3.33517	650	8.62213	0.386816	-1.37028	2.77771e-41	1.91159e-41	down	yes	LOC100525624	protein_coding	chrNC_010461.5:58941164-58951122:-
gene18844	809	10.8797	362	4.80186	2.26572	1.17997	2.91625e-41	2.006e-41	up	yes	SLC26A11	protein_coding	chrNC_010454.4:2220679-2241802:-
gene20707	506	6.80483	1039	13.7821	0.493743	-1.01817	3.62982e-41	2.49569e-41	down	yes	C13H3orf67	protein_coding	chrNC_010455.5:40486288-40768622:-
gene20518	424	5.70207	122	1.61831	3.52348	1.817	3.9891e-41	2.73956e-41	up	yes	TREX1	protein_coding	chrNC_010455.5:31177604-31180764:+
gene16356	833	11.2024	380	5.04063	2.22243	1.15214	6.5078e-41	4.45291e-41	up	yes	FOLH1B	protein_coding	chrNC_010451.4:22903997-22960648:+
gene22692	112	1.50621	413	5.47837	0.274937	-1.86282	6.91894e-41	4.73097e-41	down	yes	GGT1	protein_coding	chrNC_010456.5:49618737-49638054:+
gene18474	566	7.61173	206	2.73255	2.78558	1.47798	7.28872e-41	4.98267e-41	up	yes	EPSTI1	protein_coding	chrNC_010453.5:24116991-24216219:+
gene19390	810	10.8931	365	4.84166	2.24987	1.16984	9.02413e-41	6.15774e-41	up	yes	CISD3	protein_coding	chrNC_010454.4:23375998-23379587:-
gene7923	969	13.0314	479	6.35384	2.05095	1.03629	4.08002e-40	2.76195e-40	up	yes	CLK2	protein_coding	chrNC_010446.5:94558220-94570084:+
gene22611	196	2.63586	557	7.3885	0.356752	-1.48701	4.6214e-40	3.1256e-40	down	yes	NIPSNAP1	protein_coding	chrNC_010456.5:46624368-46641453:-
gene25076	691	9.29277	289	3.83353	2.42407	1.27743	5.45301e-40	3.68387e-40	up	yes	PLK2	protein_coding	chrNC_010458.4:37299116-37305114:-
gene16185	199	2.67621	560	7.42829	0.360272	-1.47284	1.00683e-39	6.77269e-40	down	yes	ATG16L2	protein_coding	chrNC_010451.4:7346973-7360189:+
gene19599	879	11.821	418	5.54469	2.13196	1.09218	1.15001e-39	7.72536e-40	up	yes	PPM1D	protein_coding	chrNC_010454.4:37485601-37536159:-
gene13755	619	8.32449	244	3.23661	2.57197	1.36288	1.32845e-39	8.92005e-40	up	yes	WHAMM	protein_coding	chrNC_010449.5:52108867-52140333:-
gene20108	791	10.6376	360	4.77533	2.22761	1.1555	4.12011e-39	2.74488e-39	up	yes	ZNF18	protein_coding	chrNC_010454.4:56359779-56385048:-
gene11684	349	4.69345	792	10.5057	0.446752	-1.16246	5.27736e-39	3.51115e-39	down	yes	EPHA2	protein_coding	chrNC_010448.4:75251465-75279364:-
gene11417	833	11.2024	391	5.18654	2.1599	1.11097	1.09632e-38	7.26654e-39	up	yes	LOC100514469	protein_coding	chrNC_010448.4:62440232-62456557:-
rna78622	489	6.57621	167	2.21522	2.96864	1.5698	1.12027e-38	7.4236e-39	up	yes	rna78622	protein_coding	chrNC_000845.1:16482-16549:+
gene5994	647	8.70104	266	3.52844	2.46597	1.30216	1.23138e-38	8.15088e-39	up	yes	FAM234A	protein_coding	chrNC_010445.4:41411786-41437249:-
gene28772	940	12.6414	467	6.19467	2.04069	1.02906	1.53209e-38	1.01279e-38	up	yes	LARGE1	protein_coding	chrNW_018084968.1:214422-803248:-
gene17365	380	5.11035	835	11.0761	0.461384	-1.11596	1.55315e-38	1.02603e-38	down	yes	KIAA1614	protein_coding	chrNC_010451.4:122484049-122523072:+
gene28420	251	3.37552	636	8.43642	0.400113	-1.32152	2.43892e-38	1.60833e-38	down	yes	GPSM1	protein_coding	chrNW_018084833.1:1356024-1383224:-
gene13695	558	7.50414	211	2.79888	2.68113	1.42284	3.55375e-38	2.33936e-38	up	yes	HYKK	protein_coding	chrNC_010449.5:47451822-47474778:-
gene12014	530	7.12759	194	2.57337	2.76975	1.46975	4.51696e-38	2.97014e-38	up	yes	OSCP1	protein_coding	chrNC_010448.4:92501124-92537526:-
gene18766	304	4.08828	67	0.888742	4.60007	2.20166	5.02724e-38	3.30059e-38	up	yes	FN3K	protein_coding	chrNC_010454.4:450427-463756:-
gene2457	470	6.32069	158	2.09584	3.01583	1.59255	5.43623e-38	3.56754e-38	up	yes	IRF7	protein_coding	chrNC_010444.4:372235-375572:-
gene8596	867	11.6597	420	5.57122	2.09284	1.06546	1.13714e-37	7.43795e-38	up	yes	ALG12	protein_coding	chrNC_010447.5:716928-727239:+
gene327	355	4.77414	791	10.4925	0.455007	-1.13604	1.30412e-37	8.5227e-38	down	yes	CENPW	protein_coding	chrNC_010443.5:36405693-36695978:-
gene28134	666	8.95656	284	3.76721	2.37751	1.24945	2.37291e-37	1.54365e-37	up	yes	LOC102162178	protein_coding	chrNC_010462.3:9565582-9614075:-
gene23878	351	4.72035	94	1.24689	3.78569	1.92056	6.99914e-37	4.52945e-37	up	yes	TMEM177	protein_coding	chrNC_010457.5:31578049-31582472:-
gene26635	842	11.3235	408	5.41204	2.09227	1.06507	1.29854e-36	8.36715e-37	up	yes	GPR85	protein_coding	chrNC_010460.4:32667331-32675592:+
gene13406	304	4.08828	706	9.36496	0.436551	-1.19578	1.74552e-36	1.12279e-36	down	yes	PHF1	protein_coding	chrNC_010449.5:29714295-29719996:+
gene10025	430	5.78276	892	11.8322	0.488731	-1.03289	2.14369e-36	1.37623e-36	down	yes	LOC100738955	protein_coding	chrNC_010448.4:119787-139901:-
gene12881	280	3.76552	668	8.86089	0.424959	-1.2346	2.57731e-36	1.6507e-36	down	yes	DTNBP1	protein_coding	chrNC_010449.5:11602470-11720156:-
gene22531	886	11.9152	442	5.86305	2.03225	1.02308	4.28125e-36	2.73265e-36	up	yes	TCHP	protein_coding	chrNC_010456.5:41062137-41077644:-
gene2590	656	8.82208	284	3.76721	2.34181	1.22762	7.39149e-36	4.70679e-36	up	yes	CARNS1	protein_coding	chrNC_010444.4:5097238-5105697:-
gene11350	865	11.6328	429	5.6906	2.04421	1.03154	9.74724e-36	6.20161e-36	up	yes	ZNF583	protein_coding	chrNC_010448.4:60686773-60721295:-
gene15915	379	5.0969	811	10.7578	0.473788	-1.07769	1.64051e-35	1.04132e-35	down	yes	TRIM3	protein_coding	chrNC_010451.4:3256915-3281846:+
gene10297	168	2.25931	13	0.172443	13.1018	3.7117	1.6542e-35	1.04934e-35	up	yes	MT1A	protein_coding	chrNC_010448.4:18672016-18673673:+
gene3679	836	11.2428	410	5.43857	2.06723	1.0477	1.90941e-35	1.20995e-35	up	yes	RAB8A	protein_coding	chrNC_010444.4:61430680-61450351:-
gene16940	700	9.4138	317	4.20495	2.23874	1.16269	3.86535e-35	2.43285e-35	up	yes	LOC100736569	protein_coding	chrNC_010451.4:68136576-68186756:+
gene22702	691	9.29277	311	4.12536	2.2526	1.17159	4.10302e-35	2.58134e-35	up	yes	SLC2A11	protein_coding	chrNC_010456.5:49845481-49864912:-
gene13257	246	3.30828	607	8.05174	0.410877	-1.28322	4.10752e-35	2.58363e-35	down	yes	CCHCR1	protein_coding	chrNC_010449.5:23543919-23558150:-
gene22910	310	4.16897	705	9.35169	0.445798	-1.16554	4.76262e-35	2.99128e-35	down	yes	TMEM26	protein_coding	chrNC_010456.5:64881216-64925449:-
gene7549	298	4.00759	685	9.0864	0.441054	-1.18097	8.65775e-35	5.41378e-35	down	yes	RGS20	protein_coding	chrNC_010446.5:77141935-77185209:-
gene10578	241	3.24104	597	7.91909	0.409269	-1.28888	8.67865e-35	5.4257e-35	down	yes	PDCD2L	protein_coding	chrNC_010448.4:44074107-44097070:+
gene7095	609	8.19001	258	3.42232	2.39311	1.25889	1.0949e-34	6.84222e-35	up	yes	ZNF572	protein_coding	chrNC_010446.5:14715976-14722661:-
gene15575	492	6.61656	183	2.42746	2.72571	1.44663	1.12782e-34	7.04647e-35	up	yes	C8H4orf32	protein_coding	chrNC_010450.4:110468450-110504828:-
gene19716	868	11.6731	440	5.83652	2.00001	1.00001	3.75055e-34	2.32576e-34	up	yes	LYRM9	protein_coding	chrNC_010454.4:44271407-44289687:-
gene19820	812	10.92	400	5.30592	2.05808	1.0413	3.77444e-34	2.34009e-34	up	yes	SMYD4	protein_coding	chrNC_010454.4:47944220-48009606:-
gene24671	553	7.4369	224	2.97132	2.5029	1.3236	4.45138e-34	2.75634e-34	up	yes	SP110	protein_coding	chrNC_010457.5:131169911-131226543:-
gene21924	662	8.90276	298	3.95291	2.2522	1.17134	1.06261e-33	6.54449e-34	up	yes	CBR1	protein_coding	chrNC_010455.5:199617406-199622407:+
gene13164	234	3.1469	43	0.570387	5.51713	2.46392	1.11963e-33	6.8914e-34	up	yes	ZNF389	protein_coding	chrNC_010449.5:22007384-22011998:+
gene6721	111	1.49276	373	4.94777	0.301703	-1.7288	1.2373e-33	7.60781e-34	down	yes	CGREF1	protein_coding	chrNC_010445.4:112006596-112020211:+
gene14205	241	3.24104	587	7.78644	0.416241	-1.26451	2.79158e-33	1.70837e-33	down	yes	ZNF219	protein_coding	chrNC_010449.5:78028560-78043491:+
gene21935	811	10.9066	405	5.37225	2.03017	1.0216	4.14888e-33	2.53328e-33	up	yes	CHAF1B	protein_coding	chrNC_010455.5:200048096-200074902:+
gene23240	556	7.47725	231	3.06417	2.44022	1.28701	7.16439e-33	4.35582e-33	up	yes	IFIT2	protein_coding	chrNC_010456.5:101193421-101204292:+
gene27992	310	4.16897	688	9.12619	0.456814	-1.13032	1.10466e-32	6.69842e-33	down	yes	ZNF185	protein_coding	chrNC_010461.5:123942981-123988102:+
gene22006	193	2.59552	502	6.65894	0.38978	-1.35927	6.73257e-32	4.02682e-32	down	yes	WDR4	protein_coding	chrNC_010455.5:206074943-206094713:-
gene3597	758	10.1938	375	4.9743	2.04929	1.03513	1.07033e-31	6.38639e-32	up	yes	KLHL26	protein_coding	chrNC_010444.4:59166118-59193948:-
gene17106	196	2.63586	505	6.69873	0.393487	-1.34561	1.30018e-31	7.75168e-32	down	yes	IL6	protein_coding	chrNC_010451.4:91506421-91510830:+
gene22477	484	6.50897	190	2.52031	2.5826	1.36883	1.5521e-31	9.23884e-32	up	yes	RITA1	protein_coding	chrNC_010456.5:38668086-38674131:+
gene20567	207	2.7838	521	6.91097	0.402808	-1.31183	2.24339e-31	1.33218e-31	down	yes	FAM212A	protein_coding	chrNC_010455.5:32329872-32332167:+
gene11318	340	4.57242	721	9.56393	0.47809	-1.06465	3.61635e-31	2.14109e-31	down	yes	CCDC106	protein_coding	chrNC_010448.4:59767390-59772594:+
gene3172	375	5.04311	126	1.67137	3.01736	1.59328	1.1271e-30	6.61272e-31	up	yes	DEPDC7	protein_coding	chrNC_010444.4:27909282-27928859:-
gene7131	453	6.09207	174	2.30808	2.63946	1.40024	1.32586e-30	7.76971e-31	up	yes	SHAS2	protein_coding	chrNC_010446.5:17583154-17613524:+
gene9571	291	3.91345	79	1.04792	3.73449	1.90091	1.81335e-30	1.05932e-30	up	yes	CD163	protein_coding	chrNC_010447.5:63300200-63334497:+
rna78618	396	5.32552	140	1.85707	2.8677	1.51989	2.92675e-30	1.7034e-30	up	yes	rna78618	protein_coding	chrNC_000845.1:12737-12805:+
gene12528	699	9.40035	342	4.53657	2.07213	1.05111	4.59347e-30	2.66048e-30	up	yes	SELRC1	protein_coding	chrNC_010448.4:159511862-159528982:+
gene6537	729	9.8038	364	4.82839	2.03045	1.0218	6.11655e-30	3.53303e-30	up	yes	CRIPT	protein_coding	chrNC_010445.4:93911425-93925916:-
gene2736	370	4.97587	126	1.67137	2.97712	1.57392	8.75008e-30	5.03277e-30	up	yes	VEGFB	protein_coding	chrNC_010444.4:7872873-7876149:-
gene5421	130	1.74828	384	5.09369	0.343224	-1.54278	1.27029e-29	7.28246e-30	down	yes	VPS37D	protein_coding	chrNC_010445.4:10947403-10951271:+
gene14510	281	3.77897	622	8.25071	0.458017	-1.12653	1.47543e-29	8.45198e-30	down	yes	PGF	protein_coding	chrNC_010449.5:98149510-98162784:-
gene11739	184	2.47448	471	6.24773	0.396062	-1.3362	2.68485e-29	1.53038e-29	down	yes	CAMK2N1	protein_coding	chrNC_010448.4:78730204-78734232:-
gene6052	550	7.39656	243	3.22335	2.29468	1.19829	2.91134e-29	1.65853e-29	up	yes	FBLN7	protein_coding	chrNC_010445.4:44215037-44266984:-
gene20633	657	8.83552	318	4.21821	2.09461	1.06668	5.24518e-29	2.97557e-29	up	yes	PPM1M	protein_coding	chrNC_010455.5:34380518-34385600:+
gene26859	263	3.5369	591	7.8395	0.451164	-1.14828	5.40228e-29	3.06353e-29	down	yes	INHBA	protein_coding	chrNC_010460.4:52889684-52909260:+
gene26981	512	6.88552	219	2.90499	2.37024	1.24503	5.93379e-29	3.36174e-29	up	yes	FANCB	protein_coding	chrNC_010461.5:11386360-11408958:-
gene17251	568	7.63863	260	3.44885	2.21483	1.1472	2.97241e-28	1.66534e-28	up	yes	ZNF786	protein_coding	chrNC_010451.4:109233462-109247000:+
gene5430	172	2.31311	26	0.344885	6.70689	2.74564	3.61997e-28	2.02586e-28	up	yes	METTL27	protein_coding	chrNC_010445.4:11054822-11057734:-
gene25993	60	0.806897	247	3.27641	0.246275	-2.02166	8.0233e-28	4.46583e-28	down	yes	TNNC2	protein_coding	chrNC_010459.5:48025621-48026762:-
gene7741	35	0.47069	194	2.57337	0.182908	-2.45081	1.10075e-27	6.11091e-28	down	yes	TSTD1	protein_coding	chrNC_010446.5:89401320-89402741:+
gene10739	293	3.94035	88	1.1673	3.3756	1.75514	1.14001e-27	6.32278e-28	up	yes	ZFP36	protein_coding	chrNC_010448.4:48063732-48066235:+
gene6957	221	2.97207	518	6.87117	0.432542	-1.20909	1.14359e-27	6.33932e-28	down	yes	OPLAH	protein_coding	chrNC_010446.5:629901-639420:+
gene25439	294	3.9538	627	8.31704	0.475385	-1.07283	1.2094e-27	6.70288e-28	down	yes	C17H8orf48	protein_coding	chrNC_010459.5:1610182-1612836:+
rna78620	436	5.86345	175	2.32134	2.52589	1.33679	1.29235e-27	7.15842e-28	up	yes	rna78620	protein_coding	chrNC_000845.1:12865-12934:+
gene10537	593	7.97483	281	3.72741	2.13951	1.09728	1.67159e-27	9.2387e-28	up	yes	CCNE1	protein_coding	chrNC_010448.4:39919541-39933224:+
gene339	337	4.53207	688	9.12619	0.496601	-1.00984	1.76554e-27	9.75257e-28	down	yes	HDDC2	protein_coding	chrNC_010443.5:37640628-37660751:+
gene5067	659	8.86242	330	4.37739	2.02459	1.01763	4.71736e-27	2.58807e-27	up	yes	PCYOX1L	protein_coding	chrNC_010444.4:150526002-150539393:+
gene8430	181	2.43414	451	5.98243	0.406881	-1.29732	6.05682e-27	3.31805e-27	down	yes	PALMD	protein_coding	chrNC_010446.5:118377246-118427800:-
gene7730	617	8.29759	301	3.99271	2.07819	1.05533	6.76241e-27	3.70051e-27	up	yes	B4GALT3	protein_coding	chrNC_010446.5:89278256-89284407:+
gene10117	415	5.58104	165	2.18869	2.54994	1.35046	9.40101e-27	5.12841e-27	up	yes	TAF1C	protein_coding	chrNC_010448.4:4448672-4457109:+
gene14771	491	6.60311	215	2.85193	2.31531	1.2112	1.00964e-26	5.50274e-27	up	yes	MFSD10	protein_coding	chrNC_010450.4:1710524-1715015:-
gene21488	624	8.39173	307	4.0723	2.06069	1.04313	1.05908e-26	5.76585e-27	up	yes	HSPBAP1	protein_coding	chrNC_010455.5:137739144-137805990:+
gene3066	289	3.88655	606	8.03848	0.483494	-1.04843	7.57983e-26	4.06433e-26	down	yes	DDB2	protein_coding	chrNC_010444.4:15342614-15370623:-
gene7731	587	7.89414	286	3.79374	2.08084	1.05716	9.76506e-26	5.21919e-26	up	yes	USP21	protein_coding	chrNC_010446.5:89289056-89295232:-
gene11663	215	2.89138	495	6.56608	0.440351	-1.18327	1.1229e-25	5.99409e-26	down	yes	TMEM51	protein_coding	chrNC_010448.4:74433612-74486784:+
gene17018	198	2.66276	43	0.570387	4.66834	2.22291	1.24065e-25	6.61204e-26	up	yes	SDHAF3	protein_coding	chrNC_010451.4:76699512-76771834:+
gene22544	501	6.73759	227	3.01111	2.23758	1.16194	1.34116e-25	7.14257e-26	up	yes	ALKBH2	protein_coding	chrNC_010456.5:41760427-41766990:+
gene8858	284	3.81931	592	7.85277	0.486365	-1.03989	5.67476e-25	2.98175e-25	down	yes	CACNB3	protein_coding	chrNC_010447.5:14875524-14888224:+
gene11550	243	3.26793	529	7.01709	0.465711	-1.10249	1.4263e-24	7.43414e-25	down	yes	ACOT7	protein_coding	chrNC_010448.4:67152428-67254097:-
rna78615	204	2.74345	49	0.649976	4.22085	2.07753	2.39332e-24	1.24418e-24	up	yes	rna78615	protein_coding	chrNC_000845.1:8891-8957:+
gene22707	374	5.02966	149	1.97646	2.54479	1.34754	3.38771e-24	1.75531e-24	up	yes	CHCHD10	protein_coding	chrNC_010456.5:49921600-49923529:+
gene19179	170	2.28621	415	5.5049	0.415305	-1.26776	4.19684e-24	2.1723e-24	down	yes	FZD2	protein_coding	chrNC_010454.4:18740417-18742301:-
gene5782	524	7.0469	252	3.34273	2.10813	1.07596	8.91017e-24	4.5762e-24	up	yes	ROGDI	protein_coding	chrNC_010445.4:37592982-37600004:+
gene10694	333	4.47828	125	1.6581	2.70085	1.43341	1.06748e-23	5.47308e-24	up	yes	SPINT2	protein_coding	chrNC_010448.4:47181772-47210564:+
gene25992	274	3.68483	567	7.52115	0.489929	-1.02935	1.29014e-23	6.60787e-24	down	yes	UBE2C	protein_coding	chrNC_010459.5:48018403-48021542:+
gene17047	451	6.06518	203	2.69276	2.2524	1.17147	1.72589e-23	8.82307e-24	up	yes	ARL4A	protein_coding	chrNC_010451.4:82224985-82228951:+
gene13680	102	1.37173	7	0.0928537	14.773	3.88489	7.36306e-23	3.72015e-23	up	yes	LOC100510917	protein_coding	chrNC_010449.5:46610466-46631202:-
gene13697	135	1.81552	20	0.265296	6.84336	2.77471	1.08935e-22	5.48252e-23	up	yes	CRABP1	protein_coding	chrNC_010449.5:47602316-47608865:-
gene3856	226	3.03931	487	6.45996	0.470484	-1.08778	2.70468e-22	1.34759e-22	down	yes	FBXW9	protein_coding	chrNC_010444.4:66290847-66297215:+
gene5821	468	6.2938	221	2.93152	2.14694	1.10228	3.36599e-22	1.67401e-22	up	yes	LOC100517149	protein_coding	chrNC_010445.4:38867998-38893678:-
gene22652	516	6.93932	256	3.39579	2.0435	1.03105	5.73224e-22	2.83287e-22	up	yes	PATZ1	protein_coding	chrNC_010456.5:48075345-48093385:-
gene2714	477	6.41483	229	3.03764	2.11178	1.07846	7.27743e-22	3.587e-22	up	yes	MEN1	protein_coding	chrNC_010444.4:7358130-7364952:+
gene6767	258	3.46966	86	1.14077	3.04149	1.60478	8.01163e-22	3.94497e-22	up	yes	LOC100738909	protein_coding	chrNC_010445.4:114537223-114577993:-
gene651	232	3.12	492	6.52629	0.478067	-1.06472	8.6316e-22	4.24464e-22	down	yes	TPBG	protein_coding	chrNC_010443.5:83847809-83851326:-
gene11004	464	6.24	222	2.94479	2.119	1.08338	1.85286e-21	9.03857e-22	up	yes	SPHK2	protein_coding	chrNC_010448.4:53982911-53986779:+
gene12290	54	0.726207	203	2.69276	0.269689	-1.89063	2.49716e-21	1.21419e-21	down	yes	HSBP1L1	protein_coding	chrNC_010448.4:127960330-127972241:+
gene26899	393	5.28518	176	2.33461	2.26384	1.17877	7.2787e-21	3.50597e-21	up	yes	LRRC61	protein_coding	chrNC_010460.4:55889658-55903421:+
gene25967	148	1.99035	359	4.76207	0.417958	-1.25857	7.56724e-21	3.64318e-21	down	yes	MATN4	protein_coding	chrNC_010459.5:47617559-47631195:-
gene17708	253	3.40242	515	6.83138	0.498057	-1.00562	7.64649e-21	3.68075e-21	down	yes	C10H1orf53	protein_coding	chrNC_010452.4:20732312-20737960:+
gene2306	320	4.30345	128	1.6979	2.53458	1.34175	8.30438e-21	3.99357e-21	up	yes	ENDOG	protein_coding	chrNC_010443.5:269153955-269157789:+
gene9576	363	4.88173	157	2.08258	2.34408	1.22902	1.31013e-20	6.27007e-21	up	yes	PEX5	protein_coding	chrNC_010447.5:63542422-63562762:-
gene14046	250	3.36207	508	6.73852	0.498933	-1.00308	1.67581e-20	7.99964e-21	down	yes	RIPK3	protein_coding	chrNC_010449.5:74951145-74955255:+
gene11306	90	1.21035	262	3.47538	0.348263	-1.52175	2.405e-20	1.14457e-20	down	yes	NAT14	protein_coding	chrNC_010448.4:59638174-59641072:+
gene1055	240	3.22759	491	6.51302	0.495559	-1.01287	3.64653e-20	1.72772e-20	down	yes	ZFYVE19	protein_coding	chrNC_010443.5:130510718-130517943:-
gene16275	148	1.99035	32	0.424474	4.68897	2.22927	1.25469e-19	5.88583e-20	up	yes	AQP11	protein_coding	chrNC_010451.4:12065550-12076339:+
gene20982	370	4.97587	167	2.21522	2.24621	1.1675	1.84751e-19	8.63147e-20	up	yes	FAIM	protein_coding	chrNC_010455.5:79397647-79411917:+
gene6489	275	3.69828	105	1.39281	2.65527	1.40886	2.22669e-19	1.03916e-19	up	yes	ACYP2	protein_coding	chrNC_010445.4:86945635-87231376:-
gene19957	205	2.7569	433	5.74366	0.47999	-1.05893	3.28707e-19	1.52852e-19	down	yes	ARRB2	protein_coding	chrNC_010454.4:52161776-52170362:-
gene13989	343	4.61276	150	1.98972	2.3183	1.21306	3.40959e-19	1.58475e-19	up	yes	EGLN3	protein_coding	chrNC_010449.5:65805513-65833536:+
gene27830	264	3.55035	99	1.31322	2.70355	1.43486	3.82235e-19	1.77439e-19	up	yes	STK26	protein_coding	chrNC_010461.5:108179230-108237669:+
gene20388	92	1.23724	257	3.40906	0.362928	-1.46224	6.2653e-19	2.89449e-19	down	yes	LOC641352	protein_coding	chrNC_010455.5:24046127-24068431:+
gene8183	145	1.95	341	4.5233	0.431101	-1.2139	7.17322e-19	3.30882e-19	down	yes	LOC100156167	protein_coding	chrNC_010446.5:101408108-101415914:-
gene4254	172	2.31311	47	0.623446	3.71019	1.89149	1.48526e-18	6.79334e-19	up	yes	IZUMO4	protein_coding	chrNC_010444.4:76472227-76475227:-
gene6432	217	2.91828	445	5.90284	0.494385	-1.01629	1.62143e-18	7.40936e-19	down	yes	FAM161A	protein_coding	chrNC_010445.4:79952698-79978584:+
gene10974	52	0.699311	184	2.44073	0.286518	-1.8033	2.29864e-18	1.04687e-18	down	yes	SELENOW	protein_coding	chrNC_010448.4:53470563-53474662:+
gene2367	201	2.70311	420	5.57122	0.485191	-1.04338	2.85597e-18	1.29792e-18	down	yes	MED27	protein_coding	chrNC_010443.5:271724910-271928367:-
gene7936	230	3.09311	82	1.08771	2.84367	1.50776	4.70559e-18	2.12716e-18	up	yes	EFNA1	protein_coding	chrNC_010446.5:94666457-94673442:-
gene13358	180	2.42069	54	0.7163	3.37944	1.75678	1.23412e-17	5.5236e-18	up	yes	SLA-DMB	protein_coding	chrNC_010449.5:25119278-25125089:-
gene10154	150	2.01724	38	0.504063	4.00197	2.00071	1.58774e-17	7.09036e-18	up	yes	DYNLRB2	protein_coding	chrNC_010448.4:7650444-7661380:-
gene5115	201	2.70311	408	5.41204	0.499461	-1.00156	9.79733e-17	4.29674e-17	down	yes	PDGFA	protein_coding	chrNC_010445.4:296399-322967:-
gene13814	183	2.46104	380	5.04063	0.48824	-1.03434	1.83183e-16	7.97278e-17	down	yes	HAPLN3	protein_coding	chrNC_010449.5:54519790-54537429:-
gene28390	278	3.73862	119	1.57851	2.36845	1.24394	1.98987e-16	8.65053e-17	up	yes	PTGDS	protein_coding	chrNW_018084833.1:888420-891225:-
gene13165	325	4.37069	152	2.01625	2.16773	1.11619	3.45898e-16	1.49328e-16	up	yes	LOC100520389	protein_coding	chrNC_010449.5:22031746-22038258:+
gene11894	138	1.85586	310	4.11209	0.451319	-1.14778	5.93261e-16	2.5435e-16	down	yes	RAB42	protein_coding	chrNC_010448.4:85603039-85605045:+
gene3981	355	4.77414	176	2.33461	2.04494	1.03206	1.26914e-15	5.39088e-16	up	yes	C2H19orf66	protein_coding	chrNC_010444.4:68942246-68947107:+
gene5996	282	3.79242	131	1.73769	2.18245	1.12595	1.99538e-14	8.19004e-15	up	yes	HBQ1	protein_coding	chrNC_010445.4:41478282-41480152:-
gene22965	110	1.47931	255	3.38253	0.437339	-1.19318	3.7787e-14	1.54017e-14	down	yes	SRGN	protein_coding	chrNC_010456.5:72183368-72199262:+
gene12546	159	2.13828	325	4.31106	0.495998	-1.01159	7.68834e-14	3.10991e-14	down	yes	LOC100736720	protein_coding	chrNC_010448.4:160603845-160623270:+
gene19572	148	1.99035	308	4.08556	0.487166	-1.03752	1.08248e-13	4.36147e-14	down	yes	PRR11	protein_coding	chrNC_010454.4:35433694-35462958:+
gene16511	266	3.57724	125	1.6581	2.15743	1.10932	2.10292e-13	8.39137e-14	up	yes	LAYN	protein_coding	chrNC_010451.4:39306276-39326825:+
gene13412	261	3.51	124	1.64484	2.13395	1.09353	6.5323e-13	2.56207e-13	up	yes	LOC100156231	protein_coding	chrNC_010449.5:29816048-29821351:+
gene10597	130	1.74828	43	0.570387	3.06507	1.61592	7.46821e-12	2.82195e-12	up	yes	FXYD3	protein_coding	chrNC_010448.4:44647771-44654377:+
gene21366	119	1.60035	37	0.490798	3.2607	1.70518	9.89189e-12	3.72503e-12	up	yes	SST	protein_coding	chrNC_010455.5:125337560-125338742:-
gene16758	209	2.81069	97	1.28669	2.18444	1.12726	4.31547e-11	1.58939e-11	up	yes	SPA17	protein_coding	chrNC_010451.4:51918916-51931459:+
gene12907	229	3.07966	115	1.52545	2.01885	1.01353	2.47883e-10	8.85206e-11	up	yes	NHLRC1	protein_coding	chrNC_010449.5:13816243-13817644:-
gene16551	146	1.96345	59	0.782624	2.5088	1.327	3.70527e-10	1.31343e-10	up	yes	C9H11orf71	protein_coding	chrNC_010451.4:41946824-41947477:-
gene5122	92	1.23724	196	2.5999	0.47588	-1.07133	1.16598e-09	4.048e-10	down	yes	ADAP1	protein_coding	chrNC_010445.4:548823-615471:-
rna78612	37	0.497587	4	0.0530592	9.37794	3.22927	3.37861e-08	1.09703e-08	up	yes	rna78612	protein_coding	chrNC_000845.1:6444-6509:-
gene11533	79	1.06241	166	2.20196	0.482486	-1.05144	3.49059e-08	1.13228e-08	down	yes	SMIM1	protein_coding	chrNC_010448.4:65255792-65259129:+
gene25156	59	0.793449	136	1.80401	0.439824	-1.185	3.86118e-08	1.24991e-08	down	yes	LOC100517502	protein_coding	chrNC_010458.4:47792699-47797579:-
gene6756	73	0.981725	151	2.00299	0.490131	-1.02876	2.38376e-07	7.37873e-08	down	yes	POMC	protein_coding	chrNC_010445.4:113661712-113668558:+
gene3857	72	0.968277	34	0.451004	2.14694	1.10228	0.000144558	3.66178e-05	up	yes	GNG14	protein_coding	chrNC_010444.4:66297770-66303125:-

## Sheet: DE lncRNAs
Additional file 6 List of differentially expressed (DE) genes for D4 versus D0. List of differentially expressed (DE) lncRNAs for D4 versus D0.
Gene	D4_count	D4_normalize	D0_count	D0_normalize	FoldChange	Log2FoldChange	pval	padj	Up/Down	Significant	GeneName	Biotype	Position
gene2677	39104	525.882	11707	155.291	3.38642	1.75976	0	0	up	yes	LOC100513133	lncRNA	chrNC_010444.4:6803590-6811708:-
gene15533	6275	84.388	16269	215.805	0.391038	-1.35462	0	0	down	yes	LOC100515290	lncRNA	chrNC_010450.4:104494162-104497291:+
gene16979	2297	30.8907	8432	111.849	0.276183	-1.85631	0	0	down	yes	CDK6	lncRNA	chrNC_010451.4:72510858-72765631:-
gene7524	5	0.0672414	2254	29.8989	0.00224896	-8.79653	0	0	down	yes	LOC100514834	lncRNA	chrNC_010446.5:75294209-75296319:-
gene21542	7353	98.8852	3357	44.53	2.22064	1.15098	0	0	up	yes	B4GALT4	lncRNA	chrNC_010455.5:140969561-141003936:+
gene20646	4212	56.6442	1479	19.6187	2.88726	1.5297	4.46405e-307	1.26984e-306	up	yes	SMIM4	lncRNA	chrNC_010455.5:34679623-34687171:+
gene20904	557	7.49069	2388	31.6764	0.236476	-2.08024	1.02226e-262	2.58727e-262	down	yes	LOC110256294	lncRNA	chrNC_010455.5:71762284-71779903:+
gene17946	1466	19.7152	3939	52.2501	0.377323	-1.40613	3.25042e-250	7.85359e-250	down	yes	LOC110255584	lncRNA	chrNC_010452.4:42014480-42105014:+
gene10577	1542	20.7373	355	4.70901	4.40374	2.13873	7.94864e-179	1.49267e-178	up	yes	LOC110260979	lncRNA	chrNC_010448.4:44052952-44060764:+
gene24416	3497	47.0287	1536	20.3748	2.30818	1.20676	2.38839e-178	4.47951e-178	up	yes	FAM126B	lncRNA	chrNC_010457.5:104665720-104747688:-
gene10070	1688	22.7007	3562	47.2493	0.480446	-1.05755	2.66219e-145	4.34806e-145	down	yes	SLC7A5	lncRNA	chrNC_010448.4:1545940-1574298:+
gene13595	572	7.69242	1786	23.691	0.324699	-1.62283	4.35716e-141	6.94533e-141	down	yes	LOC106504420	lncRNA	chrNC_010449.5:38717189-38746368:+
gene16545	494	6.64345	3	0.0397944	166.944	7.38322	1.19711e-111	1.59045e-111	up	yes	LOC106504875	lncRNA	chrNC_010451.4:41631006-41639471:-
gene21767	230	3.09311	791	10.4925	0.294793	-1.76223	3.56118e-71	3.46591e-71	down	yes	LOC106504207	lncRNA	chrNC_010455.5:168851833-169040334:+
gene26502	1253	16.8507	552	7.32218	2.30132	1.20246	8.69832e-65	7.91329e-65	up	yes	LOC106506781	lncRNA	chrNC_010460.4:17670017-17947568:+
gene2604	945	12.7086	390	5.17328	2.45659	1.29666	2.87911e-55	2.37654e-55	up	yes	LOC100514211	lncRNA	chrNC_010444.4:5480791-5488639:+
gene2408	273	3.67138	712	9.44455	0.38873	-1.36316	1.03741e-44	7.48995e-45	down	yes	LOC100628140	lncRNA	chrNC_010443.5:273498257-273502695:+
gene1414	876	11.7807	409	5.42531	2.17143	1.11865	4.9869e-41	3.4193e-41	up	yes	LOC110262104	lncRNA	chrNC_010443.5:179489958-179492759:+
gene5240	808	10.8662	401	5.31919	2.04283	1.03057	1.90899e-33	1.17089e-33	up	yes	LOC110259851	lncRNA	chrNC_010445.4:6293529-6296245:-
gene28276	387	5.20449	128	1.6979	3.06526	1.61601	3.20661e-32	1.92951e-32	up	yes	LOC102163687	lncRNA	chrNW_018084804.1:166888-169294:+
gene22527	500	6.72414	217	2.87846	2.33602	1.22405	1.30579e-27	7.23038e-28	up	yes	LOC100522281	lncRNA	chrNC_010456.5:40925727-40943919:-
gene16469	387	5.20449	152	2.01625	2.58127	1.36808	1.58095e-25	8.40614e-26	up	yes	LOC102162684	lncRNA	chrNC_010451.4:35839816-35872752:+
gene26819	524	7.0469	246	3.26314	2.15954	1.11073	5.99667e-25	3.14978e-25	up	yes	LOC100739791	lncRNA	chrNC_010460.4:50450512-50463100:+
gene7231	90	1.21035	283	3.75394	0.32242	-1.63299	4.9238e-24	2.54548e-24	down	yes	LOC100737961	lncRNA	chrNC_010446.5:34328428-34332552:-
gene5169	227	3.05276	486	6.4467	0.473539	-1.07845	5.77745e-22	2.85474e-22	down	yes	LOC102159434	lncRNA	chrNC_010445.4:3547515-3552591:+
gene15822	472	6.34759	226	2.99785	2.11738	1.08228	9.09374e-22	4.46748e-22	up	yes	LOC102164595	lncRNA	chrNC_010451.4:199151-223896:-
gene11918	227	3.05276	69	0.915272	3.33536	1.73784	1.58883e-21	7.76838e-22	up	yes	LOC106510641	lncRNA	chrNC_010448.4:87950805-87951743:+
gene13687	434	5.83656	205	2.71929	2.14636	1.10189	1.08397e-20	5.19938e-21	up	yes	LOC106504565	lncRNA	chrNC_010449.5:46936090-47039870:-
gene5445	240	3.22759	88	1.1673	2.765	1.46728	4.33447e-18	1.96118e-18	up	yes	LOC102167397	lncRNA	chrNC_010445.4:11704931-11706880:-
gene25691	404	5.43311	199	2.6397	2.05823	1.0414	8.32823e-18	3.74661e-18	up	yes	LOC100526084	lncRNA	chrNC_010459.5:32594223-32604508:+
gene10862	135	1.81552	33	0.437739	4.14749	2.05224	2.07264e-16	9.0051e-17	up	yes	LOC102167899	lncRNA	chrNC_010448.4:50766518-50770096:+
gene15442	126	1.69448	293	3.88659	0.435982	-1.19766	4.05538e-16	1.74595e-16	down	yes	LOC102162389	lncRNA	chrNC_010450.4:87570013-87609083:+
gene19086	277	3.72518	122	1.61831	2.3019	1.20282	1.31342e-15	5.57818e-16	up	yes	LOC102164379	lncRNA	chrNC_010454.4:14867795-14868220:-
gene3930	228	3.06621	92	1.22036	2.51254	1.32915	4.50329e-15	1.88283e-15	up	yes	LOC110259339	lncRNA	chrNC_010444.4:67913155-67922906:+
gene16254	200	2.68966	83	1.10098	2.44297	1.28863	7.54177e-13	2.95179e-13	up	yes	LOC102163793	lncRNA	chrNC_010451.4:10614982-10627969:-
gene26069	186	2.50138	74	0.981596	2.54828	1.34952	7.81023e-13	3.05446e-13	up	yes	LOC102164659	lncRNA	chrNC_010459.5:51698126-51712510:+
gene684	155	2.08448	56	0.742829	2.80614	1.48859	1.88968e-12	7.29463e-13	up	yes	LOC106506626	lncRNA	chrNC_010443.5:92272630-92286786:-
gene24260	98	1.31793	27	0.35815	3.67983	1.87964	3.90832e-11	1.44157e-11	up	yes	LOC102158914	lncRNA	chrNC_010457.5:81804907-81806589:+
gene16329	114	1.5331	37	0.490798	3.1237	1.64325	8.53895e-11	3.10656e-11	up	yes	LOC102168178	lncRNA	chrNC_010451.4:20034334-20036505:+
gene4279	101	1.35828	217	2.87846	0.471876	-1.08352	1.03512e-10	3.75215e-11	down	yes	LOC110259375	lncRNA	chrNC_010444.4:77014564-77019322:+
gene2412	137	1.84242	52	0.68977	2.67106	1.41741	1.74193e-10	6.25949e-11	up	yes	LOC110256538	lncRNA	chrNC_010443.5:273581438-273582827:+
gene17480	36	0.484138	112	1.48566	0.325874	-1.61761	2.65205e-10	9.46269e-11	down	yes	LOC102159985	lncRNA	chrNC_010451.4:133141284-133144534:+
gene13392	82	1.10276	22	0.291826	3.77883	1.91794	8.98565e-10	3.13309e-10	up	yes	LOC100522935	lncRNA	chrNC_010449.5:28765547-28766251:+
gene24144	167	2.24586	77	1.02139	2.19883	1.13674	2.97377e-09	1.01669e-09	up	yes	LOC110257003	lncRNA	chrNC_010457.5:68068817-68107235:-
gene27769	177	2.38035	89	1.18057	2.01627	1.01169	2.772e-08	9.03802e-09	up	yes	LOC102165926	lncRNA	chrNC_010461.5:98758563-98821344:+
gene28608	34	0.457242	91	1.2071	0.378794	-1.40051	3.06239e-07	9.42363e-08	down	yes	LOC110258202	lncRNA	chrNW_018084904.1:36204-38490:+
gene12731	75	1.00862	27	0.35815	2.8162	1.49375	9.04577e-07	2.70221e-07	up	yes	LOC110261254	lncRNA	chrNC_010448.4:170486507-170492193:+
gene6437	77	1.03552	33	0.437739	2.36561	1.24221	1.54083e-05	4.2372e-06	up	yes	LOC102166164	lncRNA	chrNC_010445.4:80329969-80331234:-
gene21042	62	0.833794	24	0.318355	2.61907	1.38905	2.35269e-05	6.38971e-06	up	yes	LOC106505711	lncRNA	chrNC_010455.5:86573745-86624936:+
MSTRG.17987	1292179	17377.6	422965	5610.55	3.09731	1.63101	0	0	up	yes	--	antisense	chrNC_010444.4:6747825-6758624:-
MSTRG.102815	47968	645.087	138637	1838.99	0.350783	-1.51135	0	0	down	yes	--	linc	chrNC_010454.4:19639812-19713648:+
MSTRG.28	16297	219.167	6084	80.7031	2.71572	1.44133	0	0	up	yes	--	antisense	chrNC_000845.1:132-1932:-
MSTRG.84066	14059	189.069	5900	78.2624	2.41584	1.27253	0	0	up	yes	--	linc	chrNC_010451.4:4696568-4702189:-
MSTRG.49742	4300	57.8276	521	6.91097	8.36752	3.0648	0	0	up	yes	--	linc	chrNC_010447.5:24874032-24878228:+
MSTRG.18003	10185	136.971	3917	51.9583	2.63617	1.39844	0	0	up	yes	--	antisense	chrNC_010444.4:6788713-6802404:-
MSTRG.88924	742	9.97863	3797	50.3665	0.19812	-2.33555	0	0	down	yes	--	antisense	chrNC_010451.4:70354635-70399503:-
MSTRG.65804	179	2.40724	2328	30.8805	0.0779535	-3.68124	0	0	down	yes	--	antisense	chrNC_010448.4:145422196-145427430:-
MSTRG.146410	71	0.954828	1235	16.382	0.0582851	-4.10073	4.00586e-262	1.01214e-261	down	yes	--	linc	chrNC_010459.5:54491694-54533892:+
MSTRG.111641	208	2.79724	1578	20.9319	0.133636	-2.90362	2.4883e-254	6.10611e-254	down	yes	--	linc	chrNC_010455.5:75584950-75585607:+
MSTRG.155149	1314	17.671	3655	48.4829	0.36448	-1.45609	9.71839e-245	2.30887e-244	down	yes	--	linc	chrNC_010461.5:110384150-110390583:-
MSTRG.22314	32	0.430345	886	11.7526	0.0366169	-4.77134	2.82903e-202	5.82592e-202	down	yes	--	antisense	chrNC_010444.4:69273046-69313225:+
MSTRG.97367	152	2.04414	1166	15.4668	0.132163	-2.91961	1.70959e-189	3.33205e-189	down	yes	--	antisense	chrNC_010453.5:1139288-1187871:+
MSTRG.96543	2843	38.2335	1108	14.6974	2.60137	1.37927	2.03194e-178	3.81338e-178	up	yes	--	linc	chrNC_010452.4:56427087-56567059:+
MSTRG.137809	289	3.88655	1276	16.9259	0.229622	-2.12267	5.7318e-145	9.3462e-145	down	yes	--	linc	chrNC_010457.5:138285685-138291472:-
MSTRG.42239	738	9.92483	88	1.1673	8.50236	3.08786	5.7661e-129	8.57295e-129	up	yes	--	linc	chrNC_010446.5:70928839-70933680:+
MSTRG.141125	382	5.13724	1320	17.5096	0.293397	-1.76908	4.03701e-118	5.62125e-118	down	yes	--	linc	chrNC_010458.4:50821255-50990941:-
MSTRG.67937	30	0.403449	537	7.1232	0.0566386	-4.14207	8.79643e-116	1.2013e-115	down	yes	--	linc	chrNC_010449.5:5669670-5734016:-
MSTRG.35547	271	3.64449	991	13.1454	0.277244	-1.85077	9.65512e-95	1.13966e-94	down	yes	--	linc	chrNC_010445.4:93248861-93258223:-
MSTRG.51828	340	4.57242	1056	14.0076	0.326423	-1.61519	1.1669e-83	1.26526e-83	down	yes	--	linc	chrNC_010447.5:61281553-61299692:+
MSTRG.143415	24	0.322759	376	4.98757	0.0647127	-3.94981	2.06368e-79	2.15239e-79	down	yes	--	linc	chrNC_010459.5:14845490-14845865:-
MSTRG.62128	347	4.66656	32	0.424474	10.9937	3.45861	8.03337e-68	7.58108e-68	up	yes	--	linc	chrNC_010448.4:79810276-79811573:+
MSTRG.104810	381	5.1238	68	0.902007	5.68044	2.506	9.47268e-55	7.76119e-55	up	yes	--	linc	chrNC_010454.4:43327510-43328400:-
MSTRG.93827	171	2.29966	589	7.81297	0.294338	-1.76445	1.47972e-53	1.19758e-53	down	yes	--	antisense	chrNC_010452.4:22958997-22981565:-
MSTRG.87148	286	3.84621	772	10.2404	0.37559	-1.41277	6.30551e-51	4.93845e-51	down	yes	--	linc	chrNC_010451.4:54987445-54987941:+
MSTRG.7697	262	3.52345	715	9.48434	0.371502	-1.42856	4.56233e-48	3.43438e-48	down	yes	--	linc	chrNC_010443.5:130793355-130797279:+
MSTRG.131380	56	0.753104	312	4.13862	0.18197	-2.45823	1.23088e-43	8.76799e-44	down	yes	--	antisense	chrNC_010457.5:33326717-33328324:+
MSTRG.133853	337	4.53207	744	9.86902	0.459222	-1.12274	7.62545e-35	4.77427e-35	down	yes	--	linc	chrNC_010457.5:81953532-81957512:+
MSTRG.55039	551	7.41001	223	2.95805	2.50503	1.32483	5.24164e-34	3.24299e-34	up	yes	--	linc	chrNC_010448.4:1673281-1675855:+
MSTRG.152454	196	2.63586	26	0.344885	7.64273	2.93409	5.69736e-34	3.52275e-34	up	yes	--	linc	chrNC_010461.5:45756158-45762725:+
MSTRG.50124	176	2.3669	475	6.30079	0.375651	-1.41253	5.41285e-32	3.24138e-32	down	yes	--	antisense	chrNC_010447.5:31422438-31464981:+
MSTRG.15576	481	6.46863	189	2.50705	2.58017	1.36747	2.63537e-31	1.56371e-31	up	yes	--	linc	chrNC_010443.5:256060412-256094269:+
MSTRG.139085	32	0.430345	202	2.67949	0.160607	-2.63839	4.35512e-31	2.57491e-31	down	yes	--	linc	chrNC_010458.4:24878312-24881625:+
MSTRG.59608	343	4.61276	109	1.44586	3.19031	1.6737	3.85563e-30	2.23574e-30	up	yes	--	antisense	chrNC_010448.4:54225299-54234232:-
MSTRG.98462	20	0.268966	164	2.17543	0.123638	-3.01581	4.75724e-29	2.70082e-29	down	yes	--	antisense	chrNC_010453.5:19056294-19061089:+
MSTRG.47163	134	1.80207	386	5.12022	0.351952	-1.50655	8.39554e-29	4.74472e-29	down	yes	--	linc	chrNC_010446.5:129358210-129360362:-
MSTRG.83843	104	1.39862	330	4.37739	0.319511	-1.64606	4.70635e-28	2.62989e-28	down	yes	--	linc	chrNC_010451.4:613688-623901:+
MSTRG.18804	359	4.82793	131	1.73769	2.77836	1.47424	1.92463e-26	1.04381e-26	up	yes	--	linc	chrNC_010444.4:15927825-15929970:+
MSTRG.87433	199	2.67621	468	6.20793	0.431095	-1.21392	2.6409e-25	1.39649e-25	down	yes	--	linc	chrNC_010451.4:61644848-61661824:+
MSTRG.117526	460	6.18621	202	2.67949	2.30873	1.2071	5.17463e-25	2.72088e-25	up	yes	--	antisense	chrNC_010455.5:173595328-173635021:-
MSTRG.92302	60	0.806897	233	3.0907	0.261073	-1.93748	5.37923e-25	2.82746e-25	down	yes	--	linc	chrNC_010451.4:132747127-132749812:+
MSTRG.69037	350	4.7069	139	1.84381	2.55281	1.35209	7.40772e-23	3.74208e-23	up	yes	--	antisense	chrNC_010449.5:22933562-23004345:-
MSTRG.103597	209	2.81069	462	6.12834	0.458638	-1.12457	2.56959e-22	1.28135e-22	down	yes	--	linc	chrNC_010454.4:25411110-25411544:+
MSTRG.41112	148	1.99035	367	4.86819	0.408848	-1.29036	4.67304e-22	2.31709e-22	down	yes	--	antisense	chrNC_010446.5:46740712-46766781:+
MSTRG.124816	18	0.242069	127	1.68463	0.143693	-2.79894	2.40297e-21	1.16953e-21	down	yes	--	antisense	chrNC_010456.5:71262433-71267191:+
MSTRG.25895	143	1.9231	352	4.66921	0.411869	-1.27974	5.70814e-21	2.75659e-21	down	yes	--	linc	chrNC_010444.4:117027513-117034955:-
MSTRG.6375	153	2.05759	36	0.477533	4.30878	2.10728	5.69216e-19	2.63175e-19	up	yes	--	linc	chrNC_010443.5:112942445-112944976:+
MSTRG.156300	86	1.15655	9	0.119383	9.68772	3.27616	2.46121e-17	1.09402e-17	up	yes	--	antisense	chrNW_018084787.1:26594-27178:-
MSTRG.85338	32	0.430345	140	1.85707	0.231733	-2.10946	2.70196e-17	1.19979e-17	down	yes	--	linc	chrNC_010451.4:25585359-25637099:-
MSTRG.125308	188	2.52828	61	0.809153	3.1246	1.64367	7.62914e-17	3.35225e-17	up	yes	--	linc	chrNC_010456.5:77935619-77936300:-
MSTRG.96294	42	0.564828	156	2.06931	0.272955	-1.87327	1.45004e-16	6.32309e-17	down	yes	--	linc	chrNC_010452.4:52575946-52577100:-
MSTRG.144551	91	1.22379	14	0.185707	6.58991	2.72026	1.64433e-15	6.96176e-16	up	yes	--	antisense	chrNC_010459.5:32965509-32984406:+
MSTRG.143373	148	1.99035	43	0.570387	3.48947	1.80301	2.94853e-15	1.23955e-15	up	yes	--	antisense	chrNC_010459.5:14899010-14900132:+
MSTRG.139322	31	0.416897	128	1.6979	0.245537	-2.02599	3.24125e-15	1.3607e-15	down	yes	--	linc	chrNC_010458.4:27746997-27748736:-
MSTRG.42933	212	2.85104	87	1.15404	2.47049	1.3048	9.13489e-14	3.68754e-14	up	yes	--	linc	chrNC_010446.5:78082360-78098934:-
MSTRG.63436	180	2.42069	69	0.915272	2.64478	1.40315	3.8648e-13	1.5293e-13	up	yes	--	antisense	chrNC_010448.4:94803155-94850339:+
MSTRG.12076	68	0.914483	181	2.40093	0.380887	-1.39256	6.51904e-13	2.55721e-13	down	yes	--	antisense	chrNC_010443.5:201372699-201414424:+
MSTRG.30551	170	2.28621	64	0.848948	2.69299	1.42921	8.40836e-13	3.2858e-13	up	yes	--	antisense	chrNC_010445.4:23720295-23796524:+
MSTRG.6969	220	2.95862	98	1.29995	2.27595	1.18647	1.83244e-12	7.07735e-13	up	yes	--	antisense	chrNC_010443.5:121411269-121413753:-
MSTRG.105887	149	2.00379	53	0.703035	2.85021	1.51107	2.91507e-12	1.11849e-12	up	yes	--	antisense	chrNC_010454.4:52413796-52416876:-
MSTRG.78154	72	0.968277	180	2.38767	0.405533	-1.30211	9.79426e-12	3.68874e-12	down	yes	--	linc	chrNC_010450.4:40733485-40734958:+
MSTRG.56626	30	0.403449	108	1.4326	0.28162	-1.82818	1.37637e-11	5.15896e-12	down	yes	--	linc	chrNC_010448.4:22150387-22230908:+
MSTRG.5521	76	1.02207	15	0.198972	5.13675	2.36086	1.77113e-11	6.61121e-12	up	yes	--	linc	chrNC_010443.5:99227861-99246997:+
MSTRG.101078	224	3.01242	106	1.40607	2.14244	1.09925	2.26105e-11	8.41261e-12	up	yes	--	antisense	chrNC_010454.4:1284927-1288677:-
MSTRG.124323	44	0.591725	123	1.63157	0.362671	-1.46326	7.67731e-10	2.68506e-10	down	yes	--	linc	chrNC_010456.5:61719432-61793309:+
MSTRG.103045	30	0.403449	97	1.28669	0.313556	-1.6732	1.70846e-09	5.89501e-10	down	yes	--	linc	chrNC_010454.4:21108016-21108413:-
MSTRG.90040	21	0.282414	80	1.06118	0.266131	-1.90979	2.06268e-09	7.09346e-10	down	yes	--	linc	chrNC_010451.4:93308352-93314825:+
MSTRG.142096	30	0.403449	96	1.27342	0.316822	-1.65825	2.61534e-09	8.96511e-10	down	yes	--	linc	chrNC_010458.4:71846149-71849160:+
MSTRG.121705	32	0.430345	99	1.31322	0.327703	-1.60954	3.24843e-09	1.10831e-09	down	yes	--	linc	chrNC_010456.5:32778804-32798942:+
MSTRG.104053	20	0.268966	77	1.02139	0.263333	-1.92504	3.40747e-09	1.16164e-09	down	yes	--	antisense	chrNC_010454.4:33099262-33121452:+
MSTRG.15601	79	1.06241	173	2.29481	0.462964	-1.11103	3.91155e-09	1.32817e-09	down	yes	--	linc	chrNC_010443.5:256145526-256147004:+
MSTRG.74327	163	2.19207	77	1.02139	2.14616	1.10176	1.09228e-08	3.63118e-09	up	yes	--	linc	chrNC_010449.5:91057333-91058736:-
MSTRG.66875	95	1.27759	33	0.437739	2.91861	1.54528	1.44999e-08	4.79151e-09	up	yes	--	linc	chrNC_010448.4:161166800-161172997:+
MSTRG.4076	103	1.38517	40	0.530592	2.61062	1.38439	5.44164e-08	1.74749e-08	up	yes	--	linc	chrNC_010443.5:74883820-74903388:+
MSTRG.96068	117	1.57345	50	0.663241	2.37237	1.24633	9.17224e-08	2.91168e-08	up	yes	--	linc	chrNC_010452.4:48524059-48525209:+
MSTRG.73451	86	1.15655	32	0.424474	2.72467	1.44608	2.8427e-07	8.76477e-08	up	yes	--	antisense	chrNC_010449.5:75131765-75139063:+
MSTRG.58078	22	0.295862	1	0.0132648	22.3043	4.47925	1.98704e-06	5.80507e-07	up	yes	--	linc	chrNC_010448.4:43527546-43528055:+
MSTRG.140701	54	0.726207	116	1.53872	0.471956	-1.08328	2.31774e-06	6.74674e-07	down	yes	--	antisense	chrNC_010458.4:47403575-47410095:-
MSTRG.100469	51	0.685863	17	0.225502	3.04149	1.60478	1.97132e-05	5.38333e-06	up	yes	--	linc	chrNC_010453.5:70939841-70943021:-
MSTRG.98826	51	0.685863	104	1.37954	0.497167	-1.0082	2.47487e-05	6.71543e-06	down	yes	--	linc	chrNC_010453.5:24455486-24462552:+
MSTRG.93610	80	1.07586	36	0.477533	2.25296	1.17182	2.58199e-05	6.99783e-06	up	yes	--	antisense	chrNC_010452.4:19051403-19080474:-
MSTRG.31597	18	0.242069	52	0.68977	0.350942	-1.5107	4.21173e-05	1.11743e-05	down	yes	--	linc	chrNC_010445.4:39262269-39265313:-
MSTRG.121373	88	1.18345	44	0.583652	2.02766	1.01982	8.04822e-05	2.09287e-05	up	yes	--	linc	chrNC_010456.5:28591248-28624723:+
MSTRG.156780	19	0.255517	51	0.676505	0.377702	-1.40468	0.000122403	3.1282e-05	down	yes	--	linc	chrNW_018084894.1:7161-7629:-
MSTRG.87872	32	0.430345	71	0.941802	0.456938	-1.12993	0.000131534	3.35206e-05	down	yes	--	antisense	chrNC_010451.4:66427030-66461772:+
MSTRG.119979	18	0.242069	47	0.623446	0.388276	-1.36485	0.000308811	7.61556e-05	down	yes	--	antisense	chrNC_010456.5:6294303-6322501:-
MSTRG.101436	10	0.134483	26	0.344885	0.389935	-1.35869	0.00749262	0.00156567	down	yes	--	linc	chrNC_010454.4:4420436-4437644:+

## Sheet: DE circRNAs
Additional file 6 List of differentially expressed (DE) genes for D4 versus D0. List of differentially expressed (DE) circRNAs for D4 versus D0.
circRNA_ID	D4_count	D4_normalize	D0_count	D0_normalize	FoldChange	Log2FoldChange	pval	padj	Up/Down	Significant	Location
ssc_circ_0005779	907	17758.5	22	413.479	42.949	5.42455	8.651e-220	1.01691e-216	up	yes	NC_010454.4:39366927..39391822:-
ssc_circ_0005084	0	19.5794	229	4303.94	0.00454918	-8.78018	5.03531e-45	1.97297e-42	down	yes	NC_010452.4:42063616..42079536:+
ssc_circ_0007137	315	6167.52	62	1165.26	5.29283	2.40404	3.1722e-44	9.32213e-42	up	yes	NC_010456.5:71765050..71773116:+
ssc_circ_0004147	0	19.5794	159	2988.33	0.00655197	-8.25386	1.31354e-33	3.08808e-31	down	yes	NC_010450.4:137747353..137749645:+
ssc_circ_0003238	144	2819.44	15	281.918	10.0009	3.32206	1.16861e-28	2.28946e-26	up	yes	NC_010448.4:30026332..30050135:-
ssc_circ_0003237	146	2858.6	17	319.507	8.94691	3.16139	7.16755e-28	1.20361e-25	up	yes	NC_010448.4:30026332..30032862:-
ssc_circ_0005079	442	8654.11	855	16069.3	0.538549	-0.892851	9.68088e-28	1.42246e-25	down	yes	NC_010452.4:42063516..42079536:+
ssc_circ_0005074	242	4738.22	548	10299.4	0.460049	-1.12014	7.38536e-26	9.64592e-24	down	yes	NC_010452.4:42061873..42079536:+
ssc_circ_0005080	94	1840.47	0	18.7945	97.9257	7.61362	1.47951e-22	1.73913e-20	up	yes	NC_010452.4:42063516..42147610:+
ssc_circ_0006401	87	1703.41	0	18.7945	90.6334	7.50197	3.56952e-21	3.49658e-19	up	yes	NC_010455.5:24074311..24075912:+
ssc_circ_0008183	105	2055.84	20	375.89	5.46926	2.45134	4.02586e-16	3.15487e-14	up	yes	NC_010460.4:17859078..17947161:+
ssc_circ_0000762	61	1194.35	0	18.7945	63.5475	6.98976	8.12962e-16	5.97262e-14	up	yes	NC_010443.5:641934..653683:+
ssc_circ_0001893	59	1155.19	0	18.7945	61.464	6.94167	2.18348e-15	1.50978e-13	up	yes	NC_010445.4:59424959..59425872:-
ssc_circ_0000820	0	19.5794	61	1146.47	0.0170781	-6.87171	2.4481e-15	1.59871e-13	down	yes	NC_010443.5:77263699..77270404:-
ssc_circ_0000844	98	1918.78	20	375.89	5.10464	2.35181	1.67068e-14	1.0336e-12	up	yes	NC_010443.5:82875117..82891579:+
ssc_circ_0000815	57	1116.03	5	93.9726	11.8761	3.56999	6.42014e-13	3.59661e-11	up	yes	NC_010443.5:77215898..77279692:-
ssc_circ_0003160	89	1742.57	19	357.096	4.87984	2.28683	6.42537e-13	3.59661e-11	up	yes	NC_010448.4:166989367..167024441:+
ssc_circ_0005643	0	19.5794	48	902.137	0.0217034	-6.52594	1.43501e-12	7.66736e-11	down	yes	NC_010454.4:2288303..2292225:+
ssc_circ_0000153	15	293.692	83	1559.95	0.18827	-2.40912	2.26616e-12	1.15818e-10	down	yes	NC_010443.5:129687076..129688206:-
ssc_circ_0007494	0	19.5794	46	864.548	0.022647	-6.46453	3.92737e-12	1.92356e-10	down	yes	NC_010457.5:48094739..48096210:+
ssc_circ_0006939	72	1409.72	13	244.329	5.76976	2.52851	7.00637e-12	3.29433e-10	up	yes	NC_010456.5:2843131..2861536:-
ssc_circ_0001503	0	19.5794	44	826.959	0.0236764	-6.4004	1.08323e-11	4.89738e-10	down	yes	NC_010445.4:10962194..10962666:+
ssc_circ_0007023	39	763.598	0	18.7945	40.6288	6.34443	6.34185e-11	2.6624e-09	up	yes	NC_010456.5:45490289..45490796:-
ssc_circ_0007587	39	763.598	0	18.7945	40.6288	6.34443	6.34185e-11	2.6624e-09	up	yes	NC_010457.5:75944605..75953955:+
ssc_circ_0001545	38	744.018	0	18.7945	39.587	6.30695	1.08369e-10	4.24617e-09	up	yes	NC_010445.4:115218429..115219189:+
ssc_circ_0008182	38	744.018	0	18.7945	39.587	6.30695	1.08369e-10	4.24617e-09	up	yes	NC_010460.4:17859078..17912006:+
ssc_circ_0000469	84	1644.67	22	413.479	3.97764	1.99191	1.50927e-10	5.72294e-09	up	yes	NC_010443.5:215371012..215389275:-
ssc_circ_0003930	117	2290.79	244	4585.86	0.499534	-1.00135	1.65282e-10	6.0714e-09	down	yes	NC_010449.5:78055271..78056399:-
ssc_circ_0006396	45	881.075	4	75.1781	11.7198	3.55088	1.81466e-10	6.46393e-09	up	yes	NC_010455.5:23319029..23322097:+
ssc_circ_0008250	50	978.972	6	112.767	8.68136	3.11792	1.99528e-10	6.89826e-09	up	yes	NC_010460.4:40161261..40184681:-
ssc_circ_0001098	224	4385.79	115	2161.37	2.02917	1.02089	2.15971e-10	7.25341e-09	up	yes	NC_010444.4:16373975..16389509:+
ssc_circ_0002700	3	58.7383	44	826.959	0.0710293	-3.81544	2.29703e-10	7.5003e-09	down	yes	NC_010447.5:51444401..51448377:-
ssc_circ_0006208	0	19.5794	38	714.192	0.0274148	-6.1889	2.38933e-10	7.59083e-09	down	yes	NC_010455.5:148496646..148534946:-
ssc_circ_0004662	36	704.86	0	18.7945	37.5035	6.22895	3.18771e-10	9.86074e-09	up	yes	NC_010451.4:20809498..20879578:+
ssc_circ_0005416	35	685.28	0	18.7945	36.4617	6.18831	5.48805e-10	1.65412e-08	up	yes	NC_010453.5:49379795..49380340:-
ssc_circ_0000810	2	39.1589	39	732.986	0.0534237	-4.22638	7.40348e-10	2.17566e-08	down	yes	NC_010443.5:77086749..77087208:+
ssc_circ_0003984	47	920.233	6	112.767	8.16048	3.02865	1.16725e-09	3.26684e-08	up	yes	NC_010449.5:93773489..93775334:-
ssc_circ_0001718	28	548.224	96	1804.27	0.303848	-1.71858	1.2891e-09	3.52398e-08	down	yes	NC_010445.4:28903672..28904794:-
ssc_circ_0003688	33	646.121	0	18.7945	34.3782	6.10342	1.63962e-09	4.38031e-08	up	yes	NC_010449.5:28639544..28653086:+
ssc_circ_0001461	32	626.542	0	18.7945	33.3364	6.05903	2.84571e-09	7.43348e-08	up	yes	NC_010445.4:106380539..106443851:-
ssc_circ_0002129	5	97.8972	45	845.753	0.115751	-3.1109	3.48888e-09	8.91544e-08	down	yes	NC_010446.5:123140335..123146129:+
ssc_circ_0001245	31	606.962	0	18.7945	32.2947	6.01322	4.95301e-09	1.23876e-07	up	yes	NC_010444.4:62307779..62313757:+
ssc_circ_0004830	0	19.5794	32	601.425	0.0325551	-5.94097	5.7277e-09	1.40266e-07	down	yes	NC_010451.4:73094595..73102060:+
ssc_circ_0002387	53	1037.71	10	187.945	5.52134	2.46502	6.67752e-09	1.60189e-07	up	yes	NC_010446.5:79987800..79990116:-
ssc_circ_0000677	10	195.794	56	1052.49	0.186029	-2.4264	7.15956e-09	1.68318e-07	down	yes	NC_010443.5:270874729..270884307:+
ssc_circ_0003630	30	587.383	0	18.7945	31.2529	5.96592	8.646e-09	1.91758e-07	up	yes	NC_010449.5:120464280..120473807:-
ssc_circ_0007054	30	587.383	0	18.7945	31.2529	5.96592	8.646e-09	1.91758e-07	up	yes	NC_010456.5:55301204..55308756:+
ssc_circ_0008342	30	587.383	0	18.7945	31.2529	5.96592	8.646e-09	1.91758e-07	up	yes	NC_010460.4:9133515..9140672:-
ssc_circ_0004467	43	841.916	6	112.767	7.46597	2.90033	1.20731e-08	2.58031e-07	up	yes	NC_010451.4:11061550..11113143:+
ssc_circ_0005978	147	2878.18	69	1296.82	2.21941	1.15017	1.48357e-08	2.96571e-07	up	yes	NC_010454.4:60373334..60376920:-
ssc_circ_0004220	29	567.804	0	18.7945	30.2111	5.91701	1.51379e-08	2.96571e-07	up	yes	NC_010450.4:31993513..31997428:-
ssc_circ_0006913	29	567.804	0	18.7945	30.2111	5.91701	1.51379e-08	2.96571e-07	up	yes	NC_010456.5:14989270..14992789:+
ssc_circ_0004700	35	685.28	3	56.3836	12.1539	3.60335	1.56208e-08	3.01014e-07	up	yes	NC_010451.4:33731308..33732436:+
ssc_circ_0001455	0	19.5794	30	563.836	0.0347254	-5.84786	1.68607e-08	3.19668e-07	down	yes	NC_010445.4:103726106..103773127:-
ssc_circ_0005933	32	626.542	2	37.589	16.6682	4.05903	1.82283e-08	3.4011e-07	up	yes	NC_010454.4:59273100..59296987:+
ssc_circ_0001543	42	822.336	6	112.767	7.29234	2.86638	2.1566e-08	3.96099e-07	up	yes	NC_010445.4:114813776..114839309:+
ssc_circ_0004661	66	1292.24	18	338.301	3.8198	1.9335	2.60582e-08	4.71243e-07	up	yes	NC_010451.4:20809498..20833620:+
ssc_circ_0007462	28	548.224	0	18.7945	29.1694	5.86638	2.65863e-08	4.73509e-07	up	yes	NC_010457.5:33441214..33441613:+
ssc_circ_0002986	64	1253.08	17	319.507	3.92193	1.97156	2.82171e-08	4.87825e-07	up	yes	NC_010448.4:110866624..110892394:+
ssc_circ_0000721	0	19.5794	29	545.041	0.0359229	-5.79895	2.90501e-08	4.87825e-07	down	yes	NC_010443.5:4775755..4843415:-
ssc_circ_0004336	0	19.5794	29	545.041	0.0359229	-5.79895	2.90501e-08	4.87825e-07	down	yes	NC_010450.4:74913874..74915277:+
ssc_circ_0008427	274	5364.76	434	8156.82	0.657703	-0.604492	3.37561e-08	5.58868e-07	down	yes	NC_010461.5:43052047..43052598:-
ssc_circ_0006795	41	802.757	6	112.767	7.11871	2.83162	3.84544e-08	6.27811e-07	up	yes	NC_010456.5:112705127..112714985:-
ssc_circ_0002130	49	959.392	123	2311.73	0.415011	-1.26878	4.16026e-08	6.69903e-07	down	yes	NC_010446.5:12342256..12342596:-
ssc_circ_0004648	13	254.533	59	1108.88	0.229541	-2.12318	4.29114e-08	6.81641e-07	down	yes	NC_010451.4:19905675..19913189:-
ssc_circ_0007334	2	39.1589	32	601.425	0.0651102	-3.94097	4.64633e-08	7.24492e-07	down	yes	NC_010457.5:117071799..117095608:-
ssc_circ_0003259	27	528.645	0	18.7945	28.1276	5.81391	4.68417e-08	7.24492e-07	up	yes	NC_010448.4:34743079..34747797:-
ssc_circ_0003542	9	176.215	50	939.726	0.187517	-2.4149	4.94858e-08	7.55447e-07	down	yes	NC_010448.4:98229606..98233063:-
ssc_circ_0004065	26	509.065	0	18.7945	27.0858	5.75947	8.28009e-08	1.21663e-06	up	yes	NC_010450.4:114266870..114285079:+
ssc_circ_0006812	26	509.065	0	18.7945	27.0858	5.75947	8.28009e-08	1.21663e-06	up	yes	NC_010456.5:121316588..121320413:+
ssc_circ_0001225	0	19.5794	27	507.452	0.0385838	-5.69586	8.69999e-08	1.24715e-06	down	yes	NC_010444.4:59261730..59262716:+
ssc_circ_0006802	54	1057.29	13	244.329	4.32732	2.11347	9.61074e-08	1.36111e-06	up	yes	NC_010456.5:114541451..114575408:-
ssc_circ_0007925	170	3328.5	90	1691.51	1.96777	0.976565	9.80901e-08	1.37265e-06	up	yes	NC_010459.5:13008092..13031589:+
ssc_circ_0003768	25	489.486	0	18.7945	26.0441	5.70288	1.46862e-07	2.00736e-06	up	yes	NC_010449.5:51782208..51792316:+
ssc_circ_0003712	0	19.5794	26	488.658	0.0400678	-5.64141	1.5125e-07	2.04357e-06	down	yes	NC_010449.5:31677976..31681220:-
ssc_circ_0006057	3	58.7383	32	601.425	0.0976653	-3.35601	2.60806e-07	3.22995e-06	down	yes	NC_010455.5:120931036..120935351:-
ssc_circ_0001048	24	469.906	0	18.7945	25.0023	5.64399	2.614e-07	3.22995e-06	up	yes	NC_010444.4:142406868..142407330:+
ssc_circ_0008244	24	469.906	0	18.7945	25.0023	5.64399	2.614e-07	3.22995e-06	up	yes	NC_010460.4:39594413..39630407:-
ssc_circ_0000388	0	19.5794	25	469.863	0.0416705	-5.58483	2.63787e-07	3.22995e-06	down	yes	NC_010443.5:184914188..184923633:+
ssc_circ_0000476	0	19.5794	25	469.863	0.0416705	-5.58483	2.63787e-07	3.22995e-06	down	yes	NC_010443.5:216209672..216210109:+
ssc_circ_0007487	2	39.1589	29	545.041	0.0718457	-3.79895	2.75682e-07	3.34081e-06	down	yes	NC_010457.5:46425015..46429747:-
ssc_circ_0008299	30	587.383	3	56.3836	10.4176	3.38096	3.30801e-07	3.96785e-06	up	yes	NC_010460.4:52625249..52628187:+
ssc_circ_0004483	41	802.757	104	1954.63	0.410695	-1.28386	3.60673e-07	4.28245e-06	down	yes	NC_010451.4:114529701..114533673:-
ssc_circ_0000413	0	19.5794	24	451.068	0.0434068	-5.52594	4.6157e-07	5.11854e-06	down	yes	NC_010443.5:190648253..190654424:+
ssc_circ_0002458	0	19.5794	24	451.068	0.0434068	-5.52594	4.6157e-07	5.11854e-06	down	yes	NC_010446.5:94391005..94391746:+
ssc_circ_0003094	0	19.5794	24	451.068	0.0434068	-5.52594	4.6157e-07	5.11854e-06	down	yes	NC_010448.4:157293187..157294263:+
ssc_circ_0005972	23	450.327	0	18.7945	23.9605	5.58259	4.66957e-07	5.12988e-06	up	yes	NC_010454.4:60366858..60373400:-
ssc_circ_0006727	39	763.598	100	1879.45	0.406288	-1.29943	4.73967e-07	5.15868e-06	down	yes	NC_010455.5:97912254..97995384:+
ssc_circ_0004613	7	137.056	41	770.575	0.177862	-2.49117	4.9847e-07	5.3756e-06	down	yes	NC_010451.4:131264261..131268491:-
ssc_circ_0001725	10	195.794	47	883.342	0.221652	-2.17363	6.97698e-07	7.45571e-06	down	yes	NC_010445.4:31250808..31253767:+
ssc_circ_0005951	26	509.065	2	37.589	13.5429	3.75947	7.46151e-07	7.90166e-06	up	yes	NC_010454.4:59821853..59822490:+
ssc_circ_0005290	0	19.5794	23	432.274	0.045294	-5.46453	8.10394e-07	8.13404e-06	down	yes	NC_010453.5:1231273..1238890:-
ssc_circ_0007434	0	19.5794	23	432.274	0.045294	-5.46453	8.10394e-07	8.13404e-06	down	yes	NC_010457.5:16790296..16796655:-
ssc_circ_0007780	3	58.7383	30	563.836	0.104176	-3.2629	8.36114e-07	8.13404e-06	down	yes	NC_010458.4:41104364..41106467:-
ssc_circ_0007057	22	430.748	0	18.7945	22.9188	5.51846	8.37293e-07	8.13404e-06	up	yes	NC_010456.5:55341575..55343743:+
ssc_circ_0008247	28	548.224	3	56.3836	9.72312	3.28142	1.11619e-06	1.07546e-05	up	yes	NC_010460.4:40140465..40161356:-
ssc_circ_0006247	26	509.065	76	1428.38	0.356393	-1.48846	1.13537e-06	1.08504e-05	down	yes	NC_010455.5:168849106..168855082:+
ssc_circ_0004381	6	117.477	37	695.397	0.168935	-2.56546	1.20503e-06	1.14233e-05	down	yes	NC_010450.4:87799383..87801061:+
ssc_circ_0002714	4	78.3177	32	601.425	0.13022	-2.94097	1.23776e-06	1.16397e-05	down	yes	NC_010447.5:53659519..53669181:-
ssc_circ_0001530	37	724.439	7	131.562	5.50646	2.46113	1.29575e-06	1.20883e-05	up	yes	NC_010445.4:113272703..113276969:+
ssc_circ_0000563	0	19.5794	22	413.479	0.0473529	-5.4004	1.42784e-06	1.27151e-05	down	yes	NC_010443.5:242111791..242116331:-
ssc_circ_0003598	0	19.5794	22	413.479	0.0473529	-5.4004	1.42784e-06	1.27151e-05	down	yes	NC_010449.5:113663735..113686076:+
ssc_circ_0004875	0	19.5794	22	413.479	0.0473529	-5.4004	1.42784e-06	1.27151e-05	down	yes	NC_010451.4:8646177..8646907:-
ssc_circ_0004888	0	19.5794	21	394.685	0.0496078	-5.33329	2.5249e-06	2.1507e-05	down	yes	NC_010451.4:91925246..91927551:+
ssc_circ_0005121	0	19.5794	21	394.685	0.0496078	-5.33329	2.5249e-06	2.1507e-05	down	yes	NC_010452.4:46240171..46251083:+
ssc_circ_0006068	0	19.5794	21	394.685	0.0496078	-5.33329	2.5249e-06	2.1507e-05	down	yes	NC_010455.5:121798856..121802974:-
ssc_circ_0001870	20	391.589	0	18.7945	20.8353	5.38096	2.72404e-06	2.20831e-05	up	yes	NC_010445.4:53270127..53270926:+
ssc_circ_0003699	20	391.589	0	18.7945	20.8353	5.38096	2.72404e-06	2.20831e-05	up	yes	NC_010449.5:30441064..30441599:-
ssc_circ_0003929	20	391.589	0	18.7945	20.8353	5.38096	2.72404e-06	2.20831e-05	up	yes	NC_010449.5:77950751..77956163:+
ssc_circ_0006217	20	391.589	0	18.7945	20.8353	5.38096	2.72404e-06	2.20831e-05	up	yes	NC_010455.5:157429171..157436827:+
ssc_circ_0007707	20	391.589	0	18.7945	20.8353	5.38096	2.72404e-06	2.20831e-05	up	yes	NC_010458.4:19906267..19906628:-
ssc_circ_0006214	31	606.962	5	93.9726	6.45893	2.6913	3.23436e-06	2.60405e-05	up	yes	NC_010455.5:1529653..1540269:-
ssc_circ_0003825	49	959.392	109	2048.6	0.468315	-1.09445	4.44405e-06	3.51211e-05	down	yes	NC_010449.5:58850363..58868520:+
ssc_circ_0008210	0	19.5794	20	375.89	0.0520881	-5.2629	4.48173e-06	3.51211e-05	down	yes	NC_010460.4:20594530..20615107:-
ssc_circ_0005504	14	274.112	51	958.52	0.285974	-1.80604	4.70765e-06	3.66472e-05	down	yes	NC_010453.5:77484689..77489240:+
ssc_circ_0001113	19	372.009	0	18.7945	19.7935	5.30695	4.94407e-06	3.70169e-05	up	yes	NC_010444.4:2079637..2085863:-
ssc_circ_0002305	19	372.009	0	18.7945	19.7935	5.30695	4.94407e-06	3.70169e-05	up	yes	NC_010446.5:46806844..46824504:+
ssc_circ_0004393	19	372.009	0	18.7945	19.7935	5.30695	4.94407e-06	3.70169e-05	up	yes	NC_010450.4:96061920..96073073:+
ssc_circ_0004883	19	372.009	0	18.7945	19.7935	5.30695	4.94407e-06	3.70169e-05	up	yes	NC_010451.4:89383377..89400450:+
ssc_circ_0005299	19	372.009	0	18.7945	19.7935	5.30695	4.94407e-06	3.70169e-05	up	yes	NC_010453.5:1355228..1376231:-
ssc_circ_0008165	19	372.009	0	18.7945	19.7935	5.30695	4.94407e-06	3.70169e-05	up	yes	NC_010460.4:16583749..16605796:+
ssc_circ_0005974	96	1879.63	46	864.548	2.17411	1.12043	7.46578e-06	5.5222e-05	up	yes	NC_010454.4:60366858..60376920:-
ssc_circ_0002453	23	450.327	66	1240.44	0.363039	-1.46181	7.66599e-06	5.5222e-05	down	yes	NC_010446.5:94324418..94324938:+
ssc_circ_0000643	0	19.5794	19	357.096	0.0548296	-5.1889	7.98632e-06	5.5222e-05	down	yes	NC_010443.5:264019073..264020783:+
ssc_circ_0003431	0	19.5794	19	357.096	0.0548296	-5.1889	7.98632e-06	5.5222e-05	down	yes	NC_010448.4:75038901..75043103:+
ssc_circ_0008097	0	19.5794	19	357.096	0.0548296	-5.1889	7.98632e-06	5.5222e-05	down	yes	NC_010459.5:62191115..62193549:+
ssc_circ_0000111	18	352.43	0	18.7945	18.7517	5.22895	9.01269e-06	5.72816e-05	up	yes	NC_010443.5:121330342..121335034:-
ssc_circ_0001361	18	352.43	0	18.7945	18.7517	5.22895	9.01269e-06	5.72816e-05	up	yes	NC_010444.4:87254645..87264182:+
ssc_circ_0002390	18	352.43	0	18.7945	18.7517	5.22895	9.01269e-06	5.72816e-05	up	yes	NC_010446.5:80170780..80183572:-
ssc_circ_0004329	18	352.43	0	18.7945	18.7517	5.22895	9.01269e-06	5.72816e-05	up	yes	NC_010450.4:72695061..72709918:-
ssc_circ_0005378	18	352.43	0	18.7945	18.7517	5.22895	9.01269e-06	5.72816e-05	up	yes	NC_010453.5:3193839..3208876:-
ssc_circ_0006120	18	352.43	0	18.7945	18.7517	5.22895	9.01269e-06	5.72816e-05	up	yes	NC_010455.5:132986164..132995932:+
ssc_circ_0006389	18	352.43	0	18.7945	18.7517	5.22895	9.01269e-06	5.72816e-05	up	yes	NC_010455.5:22216776..22239729:+
ssc_circ_0007687	18	352.43	0	18.7945	18.7517	5.22895	9.01269e-06	5.72816e-05	up	yes	NC_010457.5:94387078..94413980:+
ssc_circ_0005979	55	1076.87	19	357.096	3.01563	1.59246	9.01513e-06	5.72816e-05	up	yes	NC_010454.4:60375325..60376920:-
ssc_circ_0006896	2	39.1589	23	432.274	0.0905881	-3.46453	9.73323e-06	6.15118e-05	down	yes	NC_010456.5:136410332..136412160:+
ssc_circ_0004779	6	117.477	33	620.219	0.189411	-2.4004	1.01321e-05	6.36902e-05	down	yes	NC_010451.4:56972613..56973685:-
ssc_circ_0000527	14	274.112	49	920.931	0.297647	-1.74833	1.14918e-05	7.18528e-05	down	yes	NC_010443.5:229788474..229795138:-
ssc_circ_0003837	4	78.3177	28	526.247	0.148823	-2.74833	1.17048e-05	7.27973e-05	down	yes	NC_010449.5:60748007..60757895:-
ssc_circ_0006671	24	469.906	3	56.3836	8.3341	3.05903	1.25245e-05	7.70799e-05	up	yes	NC_010455.5:79323253..79342130:-
ssc_circ_0005650	11	215.374	43	808.164	0.266497	-1.90781	1.28817e-05	7.88657e-05	down	yes	NC_010454.4:2306701..2308584:+
ssc_circ_0002940	10	195.794	41	770.575	0.254089	-1.9766	1.29658e-05	7.89691e-05	down	yes	NC_010448.4:106217223..106217661:-
ssc_circ_0000997	17	332.85	54	1014.9	0.327962	-1.6084	1.41859e-05	7.92309e-05	down	yes	NC_010444.4:135356735..135361038:+
ssc_circ_0000325	0	19.5794	18	338.301	0.0578757	-5.1109	1.42895e-05	7.92309e-05	down	yes	NC_010443.5:169551755..169559446:-
ssc_circ_0001092	0	19.5794	18	338.301	0.0578757	-5.1109	1.42895e-05	7.92309e-05	down	yes	NC_010444.4:15968765..15970677:+
ssc_circ_0002503	0	19.5794	18	338.301	0.0578757	-5.1109	1.42895e-05	7.92309e-05	down	yes	NC_010447.5:101579751..101587848:+
ssc_circ_0006480	0	19.5794	18	338.301	0.0578757	-5.1109	1.42895e-05	7.92309e-05	down	yes	NC_010455.5:31448023..31473909:-
ssc_circ_0006823	0	19.5794	18	338.301	0.0578757	-5.1109	1.42895e-05	7.92309e-05	down	yes	NC_010456.5:125707566..125716203:+
ssc_circ_0000225	42	822.336	12	225.534	3.64617	1.86638	1.45308e-05	8.01907e-05	up	yes	NC_010443.5:146142261..146194348:-
ssc_circ_0008533	3	58.7383	25	469.863	0.125012	-2.99987	1.5066e-05	8.2756e-05	down	yes	NC_010461.5:98262075..98263484:-
ssc_circ_0002818	17	332.85	0	18.7945	17.71	5.14649	1.65046e-05	8.34536e-05	up	yes	NC_010447.5:7813518..7853188:+
ssc_circ_0003155	17	332.85	0	18.7945	17.71	5.14649	1.65046e-05	8.34536e-05	up	yes	NC_010448.4:166971305..167000612:+
ssc_circ_0003380	17	332.85	0	18.7945	17.71	5.14649	1.65046e-05	8.34536e-05	up	yes	NC_010448.4:64236415..64240458:+
ssc_circ_0006070	17	332.85	0	18.7945	17.71	5.14649	1.65046e-05	8.34536e-05	up	yes	NC_010455.5:121802237..121802974:-
ssc_circ_0006322	17	332.85	0	18.7945	17.71	5.14649	1.65046e-05	8.34536e-05	up	yes	NC_010455.5:197371647..197372023:+
ssc_circ_0006496	17	332.85	0	18.7945	17.71	5.14649	1.65046e-05	8.34536e-05	up	yes	NC_010455.5:32466924..32541480:+
ssc_circ_0008591	17	332.85	0	18.7945	17.71	5.14649	1.65046e-05	8.34536e-05	up	yes	NW_018084979.1:2035285..2045203:+
ssc_circ_0006369	21	411.168	2	37.589	10.9385	3.45134	1.65419e-05	8.34536e-05	up	yes	NC_010455.5:206595223..206626785:-
ssc_circ_0006813	2	39.1589	22	413.479	0.0947057	-3.4004	1.76146e-05	8.84855e-05	down	yes	NC_010456.5:121395348..121396290:+
ssc_circ_0008406	13	254.533	46	864.548	0.294411	-1.7641	1.89296e-05	9.46865e-05	down	yes	NC_010461.5:20243402..20247157:+
ssc_circ_0008316	12	234.953	44	826.959	0.284117	-1.81544	1.98382e-05	9.88109e-05	down	yes	NC_010460.4:54558710..54563773:-
ssc_circ_0003039	37	724.439	86	1616.33	0.4482	-1.15778	2.00125e-05	9.92584e-05	down	yes	NC_010448.4:135651327..135660627:+
ssc_circ_0004694	4	78.3177	27	507.452	0.154335	-2.69586	2.04042e-05	0.000100354	down	yes	NC_010451.4:33043520..33045820:+
ssc_circ_0005874	4	78.3177	27	507.452	0.154335	-2.69586	2.04042e-05	0.000100354	down	yes	NC_010454.4:50206420..50209164:-
ssc_circ_0002127	10	195.794	40	751.781	0.260441	-1.94097	2.08371e-05	0.000102057	down	yes	NC_010446.5:123116610..123125471:+
ssc_circ_0005773	67	1311.82	28	526.247	2.49279	1.31776	2.11055e-05	0.000102942	up	yes	NC_010454.4:38796303..38800438:-
ssc_circ_0000242	23	450.327	3	56.3836	7.98685	2.99763	2.28285e-05	0.000110886	up	yes	NC_010443.5:149357462..149488620:-
ssc_circ_0008605	77	1507.62	35	657.808	2.29188	1.19653	2.3577e-05	0.00011405	up	yes	NW_018084979.1:3325019..3327814:-
ssc_circ_0000065	46	900.654	15	281.918	3.19474	1.6757	2.54371e-05	0.000115638	up	yes	NC_010443.5:113128000..113128579:+
ssc_circ_0003234	0	19.5794	17	319.507	0.0612802	-5.02844	2.56759e-05	0.000115638	down	yes	NC_010448.4:29377388..29384324:+
ssc_circ_0003937	0	19.5794	17	319.507	0.0612802	-5.02844	2.56759e-05	0.000115638	down	yes	NC_010449.5:80343073..80346071:+
ssc_circ_0004982	0	19.5794	17	319.507	0.0612802	-5.02844	2.56759e-05	0.000115638	down	yes	NC_010452.4:20065005..20073030:-
ssc_circ_0005976	0	19.5794	17	319.507	0.0612802	-5.02844	2.56759e-05	0.000115638	down	yes	NC_010454.4:60370050..60376920:-
ssc_circ_0005761	3	58.7383	24	451.068	0.13022	-2.94097	2.67302e-05	0.000119926	down	yes	NC_010454.4:38083733..38093378:+
ssc_circ_0007100	30	587.383	74	1390.79	0.422336	-1.24354	2.83919e-05	0.000123096	down	yes	NC_010456.5:6472831..6473538:+
ssc_circ_0002654	16	313.271	0	18.7945	16.6682	5.05903	3.03688e-05	0.000123096	up	yes	NC_010447.5:34492206..34513084:+
ssc_circ_0002742	16	313.271	0	18.7945	16.6682	5.05903	3.03688e-05	0.000123096	up	yes	NC_010447.5:6565453..6566862:+
ssc_circ_0003181	16	313.271	0	18.7945	16.6682	5.05903	3.03688e-05	0.000123096	up	yes	NC_010448.4:17193646..17201280:-
ssc_circ_0003604	16	313.271	0	18.7945	16.6682	5.05903	3.03688e-05	0.000123096	up	yes	NC_010449.5:114594354..114596124:+
ssc_circ_0004735	16	313.271	0	18.7945	16.6682	5.05903	3.03688e-05	0.000123096	up	yes	NC_010451.4:41643139..41644483:+
ssc_circ_0006312	16	313.271	0	18.7945	16.6682	5.05903	3.03688e-05	0.000123096	up	yes	NC_010455.5:197054745..197067577:-
ssc_circ_0008572	16	313.271	0	18.7945	16.6682	5.05903	3.03688e-05	0.000123096	up	yes	NW_018084979.1:1174519..1174823:+
ssc_circ_0002729	69	1350.98	131	2462.08	0.548715	-0.865872	3.43922e-05	0.000138925	down	yes	NC_010447.5:60168451..60168844:+
ssc_circ_0000308	38	744.018	11	206.74	3.59882	1.84752	4.20949e-05	0.000169458	up	yes	NC_010443.5:166033284..166037819:+
ssc_circ_0002835	5	97.8972	28	526.247	0.186029	-2.4264	4.28296e-05	0.000171827	down	yes	NC_010447.5:79664916..79682972:+
ssc_circ_0000603	0	19.5794	16	300.712	0.0651102	-4.94097	4.634e-05	0.000171835	down	yes	NC_010443.5:253012174..253014268:-
ssc_circ_0001539	0	19.5794	16	300.712	0.0651102	-4.94097	4.634e-05	0.000171835	down	yes	NC_010445.4:114743498..114755035:+
ssc_circ_0004672	0	19.5794	16	300.712	0.0651102	-4.94097	4.634e-05	0.000171835	down	yes	NC_010451.4:2587898..2589883:-
ssc_circ_0006157	0	19.5794	16	300.712	0.0651102	-4.94097	4.634e-05	0.000171835	down	yes	NC_010455.5:135007591..135020313:+
ssc_circ_0008317	0	19.5794	16	300.712	0.0651102	-4.94097	4.634e-05	0.000171835	down	yes	NC_010460.4:54562129..54563773:-
ssc_circ_0008613	0	19.5794	16	300.712	0.0651102	-4.94097	4.634e-05	0.000171835	down	yes	NW_018085018.1:276847..277808:+
ssc_circ_0003139	3	58.7383	23	432.274	0.135882	-2.87957	4.73235e-05	0.00017493	down	yes	NC_010448.4:163299858..163306198:+
ssc_circ_0004178	51	998.551	19	357.096	2.79631	1.48352	4.93972e-05	0.000182023	up	yes	NC_010450.4:18861488..18879156:-
ssc_circ_0000676	7	137.056	32	601.425	0.227886	-2.13362	5.19532e-05	0.000188072	down	yes	NC_010443.5:270874729..270876043:+
ssc_circ_0005008	20	391.589	56	1052.49	0.372058	-1.4264	5.20686e-05	0.000188072	down	yes	NC_010452.4:24795546..24799565:-
ssc_circ_0002931	41	802.757	89	1672.71	0.479913	-1.05915	5.40284e-05	0.000188072	down	yes	NC_010448.4:1051422..1057079:-
ssc_circ_0006165	9	176.215	36	676.603	0.260441	-1.94097	5.40793e-05	0.000188072	down	yes	NC_010455.5:137373443..137376721:-
ssc_circ_0001450	16	313.271	49	920.931	0.340167	-1.55568	5.4324e-05	0.000188072	down	yes	NC_010445.4:103690300..103773127:-
ssc_circ_0004349	26	509.065	5	93.9726	5.41717	2.43754	5.46083e-05	0.000188072	up	yes	NC_010450.4:80787216..80815987:-
ssc_circ_0000030	15	293.692	0	18.7945	15.6264	4.96592	5.61587e-05	0.000188072	up	yes	NC_010443.5:107535162..107553238:-
ssc_circ_0000647	15	293.692	0	18.7945	15.6264	4.96592	5.61587e-05	0.000188072	up	yes	NC_010443.5:264644525..264782210:-
ssc_circ_0000757	15	293.692	0	18.7945	15.6264	4.96592	5.61587e-05	0.000188072	up	yes	NC_010443.5:593018..611340:+
ssc_circ_0001588	15	293.692	0	18.7945	15.6264	4.96592	5.61587e-05	0.000188072	up	yes	NC_010445.4:125886851..125900323:+
ssc_circ_0004470	15	293.692	0	18.7945	15.6264	4.96592	5.61587e-05	0.000188072	up	yes	NC_010451.4:11105674..11113143:+
ssc_circ_0006613	15	293.692	0	18.7945	15.6264	4.96592	5.61587e-05	0.000188072	up	yes	NC_010455.5:69223492..69228869:-
ssc_circ_0007122	15	293.692	0	18.7945	15.6264	4.96592	5.61587e-05	0.000188072	up	yes	NC_010456.5:71491530..71493586:+
ssc_circ_0007376	15	293.692	0	18.7945	15.6264	4.96592	5.61587e-05	0.000188072	up	yes	NC_010457.5:131998300..132021440:+
ssc_circ_0007835	15	293.692	0	18.7945	15.6264	4.96592	5.61587e-05	0.000188072	up	yes	NC_010458.4:50437615..50446698:-
ssc_circ_0007984	15	293.692	0	18.7945	15.6264	4.96592	5.61587e-05	0.000188072	up	yes	NC_010459.5:34722015..34724622:+
ssc_circ_0008561	15	293.692	0	18.7945	15.6264	4.96592	5.61587e-05	0.000188072	up	yes	NW_018084833.1:315438..329028:-
ssc_circ_0006702	5	97.8972	27	507.452	0.192919	-2.37393	7.28e-05	0.00024311	down	yes	NC_010455.5:86452535..86474319:-
ssc_circ_0000944	0	19.5794	15	281.918	0.0694509	-4.84786	8.40218e-05	0.000257202	down	yes	NC_010444.4:116970371..116975681:-
ssc_circ_0001019	0	19.5794	15	281.918	0.0694509	-4.84786	8.40218e-05	0.000257202	down	yes	NC_010444.4:140023010..140040900:-
ssc_circ_0003313	0	19.5794	15	281.918	0.0694509	-4.84786	8.40218e-05	0.000257202	down	yes	NC_010448.4:44131596..44136685:+
ssc_circ_0005491	0	19.5794	15	281.918	0.0694509	-4.84786	8.40218e-05	0.000257202	down	yes	NC_010453.5:713800..714610:+
ssc_circ_0005918	0	19.5794	15	281.918	0.0694509	-4.84786	8.40218e-05	0.000257202	down	yes	NC_010454.4:56373698..56376926:-
ssc_circ_0006561	0	19.5794	15	281.918	0.0694509	-4.84786	8.40218e-05	0.000257202	down	yes	NC_010455.5:45391196..45447139:+
ssc_circ_0004451	221	4327.05	153	2875.56	1.50477	0.589542	8.65052e-05	0.000264117	up	yes	NC_010451.4:107710908..107712562:-
ssc_circ_0007329	19	372.009	53	996.11	0.373462	-1.42097	8.67639e-05	0.000264221	down	yes	NC_010457.5:112895498..112896614:-
ssc_circ_0000938	8	156.635	33	620.219	0.252549	-1.98537	8.72988e-05	0.000265162	down	yes	NC_010444.4:115894554..115897120:+
ssc_circ_0007483	31	606.962	8	150.356	4.03683	2.01322	8.9749e-05	0.000271902	up	yes	NC_010457.5:46294098..46315302:+
ssc_circ_0001839	29	567.804	7	131.562	4.31588	2.10965	9.46492e-05	0.00028601	up	yes	NC_010445.4:46142071..46151353:+
ssc_circ_0006059	27	528.645	6	112.767	4.68793	2.22895	9.68232e-05	0.000291484	up	yes	NC_010455.5:121571994..121577363:+
ssc_circ_0001526	18	352.43	51	958.52	0.367681	-1.44347	9.78573e-05	0.000291484	down	yes	NC_010445.4:113127816..113131647:+
ssc_circ_0002398	2	39.1589	19	357.096	0.109659	-3.1889	0.000103933	0.000291484	down	yes	NC_010446.5:82779059..82785563:-
ssc_circ_0001091	14	274.112	0	18.7945	14.5847	4.86638	0.000104395	0.000291484	up	yes	NC_010444.4:15967840..16021491:+
ssc_circ_0002628	14	274.112	0	18.7945	14.5847	4.86638	0.000104395	0.000291484	up	yes	NC_010447.5:30653358..30654236:+
ssc_circ_0004033	14	274.112	0	18.7945	14.5847	4.86638	0.000104395	0.000291484	up	yes	NC_010450.4:102404323..102416806:+
ssc_circ_0006146	14	274.112	0	18.7945	14.5847	4.86638	0.000104395	0.000291484	up	yes	NC_010455.5:134624946..134633963:+
ssc_circ_0007085	14	274.112	0	18.7945	14.5847	4.86638	0.000104395	0.000291484	up	yes	NC_010456.5:60813334..60813820:-
ssc_circ_0008339	14	274.112	0	18.7945	14.5847	4.86638	0.000104395	0.000291484	up	yes	NC_010460.4:8305622..8313537:-
ssc_circ_0001613	18	352.43	2	37.589	9.37587	3.22895	0.000105666	0.000294332	up	yes	NC_010445.4:131272241..131272989:+
ssc_circ_0002193	17	332.85	49	920.931	0.361428	-1.46822	0.000109964	0.000304859	down	yes	NC_010446.5:15288794..15303961:+
ssc_circ_0006411	20	391.589	3	56.3836	6.94509	2.79599	0.000136341	0.000377095	up	yes	NC_010455.5:26682837..26686462:+
ssc_circ_0001115	9	176.215	34	639.014	0.275761	-1.85851	0.000138478	0.000382108	down	yes	NC_010444.4:2134407..2139037:-
ssc_circ_0001636	8	156.635	32	601.425	0.260441	-1.94097	0.000141066	0.000385324	down	yes	NC_010445.4:16850859..16851571:-
ssc_circ_0005085	8	156.635	32	601.425	0.260441	-1.94097	0.000141066	0.000385324	down	yes	NC_010452.4:42063616..42147610:+
ssc_circ_0003233	92	1801.31	50	939.726	1.91684	0.938733	0.00014943	0.000385324	up	yes	NC_010448.4:29344146..29357287:+
ssc_circ_0004325	14	274.112	43	808.164	0.339179	-1.55988	0.000151656	0.000385324	down	yes	NC_010450.4:71638232..71643022:-
ssc_circ_0001138	0	19.5794	14	263.123	0.0744116	-4.74833	0.000153084	0.000385324	down	yes	NC_010444.4:3092101..3092483:-
ssc_circ_0004038	0	19.5794	14	263.123	0.0744116	-4.74833	0.000153084	0.000385324	down	yes	NC_010450.4:10406166..10433424:+
ssc_circ_0004437	0	19.5794	14	263.123	0.0744116	-4.74833	0.000153084	0.000385324	down	yes	NC_010451.4:10545627..10553637:-
ssc_circ_0004771	0	19.5794	14	263.123	0.0744116	-4.74833	0.000153084	0.000385324	down	yes	NC_010451.4:52743673..52750537:+
ssc_circ_0004915	0	19.5794	14	263.123	0.0744116	-4.74833	0.000153084	0.000385324	down	yes	NC_010452.4:11446256..11459646:-
ssc_circ_0008521	0	19.5794	14	263.123	0.0744116	-4.74833	0.000153084	0.000385324	down	yes	NC_010461.5:88089031..88095383:+
ssc_circ_0008608	0	19.5794	14	263.123	0.0744116	-4.74833	0.000153084	0.000385324	down	yes	NW_018084979.1:3474375..3484061:+
ssc_circ_0004513	22	430.748	4	75.1781	5.7297	2.51846	0.000155961	0.000391727	up	yes	NC_010451.4:118058399..118074614:-
ssc_circ_0005711	24	469.906	5	93.9726	5.00046	2.32206	0.000164792	0.000411575	up	yes	NC_010454.4:35345176..35361801:-
ssc_circ_0006491	26	509.065	6	112.767	4.51431	2.1745	0.000164913	0.000411575	up	yes	NC_010455.5:32070527..32070917:+
ssc_circ_0005115	51	998.551	21	394.685	2.53	1.33913	0.000172422	0.000429403	up	yes	NC_010452.4:45992309..46006364:+
ssc_circ_0002879	35	685.28	11	206.74	3.3147	1.72888	0.000173597	0.000429718	up	yes	NC_010447.5:88253163..88273584:+
ssc_circ_0006891	35	685.28	11	206.74	3.3147	1.72888	0.000173597	0.000429718	up	yes	NC_010456.5:136319810..136335070:+
ssc_circ_0006210	45	881.075	91	1710.3	0.515157	-0.956915	0.000173645	0.000429718	down	yes	NC_010455.5:148517273..148534946:-
ssc_circ_0006014	40	783.177	14	263.123	2.97647	1.5736	0.000174626	0.000431239	up	yes	NC_010455.5:108874660..108880840:-
ssc_circ_0008559	22	430.748	56	1052.49	0.409264	-1.2889	0.000180884	0.000436913	down	yes	NW_018084833.1:315438..318832:-
ssc_circ_0001226	4	78.3177	23	432.274	0.181176	-2.46453	0.000182724	0.000436913	down	yes	NC_010444.4:59261733..59262716:+
ssc_circ_0003228	4	78.3177	23	432.274	0.181176	-2.46453	0.000182724	0.000436913	down	yes	NC_010448.4:28736919..28754026:+
ssc_circ_0004761	4	78.3177	23	432.274	0.181176	-2.46453	0.000182724	0.000436913	down	yes	NC_010451.4:45877120..45880176:+
ssc_circ_0000692	41	802.757	85	1597.53	0.502497	-0.992812	0.000183089	0.000436913	down	yes	NC_010443.5:273972338..273979720:+
ssc_circ_0001021	2	39.1589	18	338.301	0.115751	-3.1109	0.000187384	0.000436913	down	yes	NC_010444.4:140477822..140478478:-
ssc_circ_0005391	43	841.916	16	300.712	2.79974	1.48529	0.000191707	0.000436913	up	yes	NC_010453.5:4104218..4118265:+
ssc_circ_0000021	13	254.533	0	18.7945	13.5429	4.75947	0.000195137	0.000436913	up	yes	NC_010443.5:106150521..106171073:+
ssc_circ_0001710	13	254.533	0	18.7945	13.5429	4.75947	0.000195137	0.000436913	up	yes	NC_010445.4:28638834..28692651:+
ssc_circ_0001731	13	254.533	0	18.7945	13.5429	4.75947	0.000195137	0.000436913	up	yes	NC_010445.4:31255432..31258924:+
ssc_circ_0002444	13	254.533	0	18.7945	13.5429	4.75947	0.000195137	0.000436913	up	yes	NC_010446.5:94071242..94073490:+
ssc_circ_0002456	13	254.533	0	18.7945	13.5429	4.75947	0.000195137	0.000436913	up	yes	NC_010446.5:94369484..94391746:+
ssc_circ_0002465	13	254.533	0	18.7945	13.5429	4.75947	0.000195137	0.000436913	up	yes	NC_010446.5:94601795..94602258:+
ssc_circ_0002710	13	254.533	0	18.7945	13.5429	4.75947	0.000195137	0.000436913	up	yes	NC_010447.5:53623267..53659626:-
ssc_circ_0003647	13	254.533	0	18.7945	13.5429	4.75947	0.000195137	0.000436913	up	yes	NC_010449.5:15922699..15924948:+
ssc_circ_0003802	13	254.533	0	18.7945	13.5429	4.75947	0.000195137	0.000436913	up	yes	NC_010449.5:56524083..56526919:-
ssc_circ_0004362	13	254.533	0	18.7945	13.5429	4.75947	0.000195137	0.000436913	up	yes	NC_010450.4:83267616..83268011:+
ssc_circ_0007169	13	254.533	0	18.7945	13.5429	4.75947	0.000195137	0.000436913	up	yes	NC_010456.5:73752038..73759656:+
ssc_circ_0007402	13	254.533	0	18.7945	13.5429	4.75947	0.000195137	0.000436913	up	yes	NC_010457.5:137883502..137889389:+
ssc_circ_0007466	13	254.533	0	18.7945	13.5429	4.75947	0.000195137	0.000436913	up	yes	NC_010457.5:3913056..3943647:-
ssc_circ_0007873	13	254.533	0	18.7945	13.5429	4.75947	0.000195137	0.000436913	up	yes	NC_010458.4:64650290..64669823:+
ssc_circ_0007471	33	646.121	10	187.945	3.43782	1.78149	0.000197196	0.000440684	up	yes	NC_010457.5:4207163..4211249:-
ssc_circ_0002919	28	548.224	65	1221.64	0.448759	-1.15599	0.000213421	0.000476037	down	yes	NC_010448.4:103910117..103911289:-
ssc_circ_0004404	8	156.635	31	582.63	0.268842	-1.89517	0.000226843	0.000505017	down	yes	NC_010450.4:986798..992003:+
ssc_circ_0002083	19	372.009	3	56.3836	6.59783	2.72199	0.000245964	0.000546551	up	yes	NC_010446.5:106850368..106859846:+
ssc_circ_0000037	3	58.7383	20	375.89	0.156264	-2.67794	0.000258542	0.000573415	down	yes	NC_010443.5:108459471..108468465:-
ssc_circ_0006049	35	685.28	75	1409.59	0.486156	-1.04051	0.000259638	0.000574763	down	yes	NC_010455.5:120778216..120779879:+
ssc_circ_0000487	94	1840.47	53	996.11	1.84766	0.885695	0.000262304	0.000578108	up	yes	NC_010443.5:217786693..217794582:+
ssc_circ_0005423	34	665.701	11	206.74	3.21999	1.68706	0.000275463	0.000578108	up	yes	NC_010453.5:51540591..51551593:+
ssc_circ_0000854	0	19.5794	13	244.329	0.0801356	-4.64141	0.00028033	0.000578108	down	yes	NC_010443.5:8586433..8598060:-
ssc_circ_0003322	0	19.5794	13	244.329	0.0801356	-4.64141	0.00028033	0.000578108	down	yes	NC_010448.4:46104858..46105348:-
ssc_circ_0003435	0	19.5794	13	244.329	0.0801356	-4.64141	0.00028033	0.000578108	down	yes	NC_010448.4:7552153..7552741:+
ssc_circ_0003798	0	19.5794	13	244.329	0.0801356	-4.64141	0.00028033	0.000578108	down	yes	NC_010449.5:56509179..56526919:-
ssc_circ_0004538	0	19.5794	13	244.329	0.0801356	-4.64141	0.00028033	0.000578108	down	yes	NC_010451.4:121607065..121617143:+
ssc_circ_0004804	0	19.5794	13	244.329	0.0801356	-4.64141	0.00028033	0.000578108	down	yes	NC_010451.4:66406846..66409132:-
ssc_circ_0006576	0	19.5794	13	244.329	0.0801356	-4.64141	0.00028033	0.000578108	down	yes	NC_010455.5:54881268..54887738:-
ssc_circ_0007063	0	19.5794	13	244.329	0.0801356	-4.64141	0.00028033	0.000578108	down	yes	NC_010456.5:55880862..55886147:-
ssc_circ_0008568	0	19.5794	13	244.329	0.0801356	-4.64141	0.00028033	0.000578108	down	yes	NW_018084874.1:655379..663972:-
ssc_circ_0005015	23	450.327	5	93.9726	4.79211	2.26066	0.000284305	0.000585279	up	yes	NC_010452.4:25600746..25606516:-
ssc_circ_0004601	11	215.374	36	676.603	0.318316	-1.65147	0.000303995	0.000624719	down	yes	NC_010451.4:130337853..130384896:-
ssc_circ_0003674	4	78.3177	22	413.479	0.189411	-2.4004	0.000313204	0.000640286	down	yes	NC_010449.5:2397188..2401736:+
ssc_circ_0007778	4	78.3177	22	413.479	0.189411	-2.4004	0.000313204	0.000640286	down	yes	NC_010458.4:40251241..40253338:+
ssc_circ_0004647	88	1722.99	49	920.931	1.87092	0.903749	0.000328039	0.000669448	up	yes	NC_010451.4:19897760..19913189:-
ssc_circ_0002776	2	39.1589	17	319.507	0.12256	-3.02844	0.000337301	0.000677012	down	yes	NC_010447.5:69064669..69068669:+
ssc_circ_0002066	20	391.589	51	958.52	0.408534	-1.29147	0.000345328	0.000677012	down	yes	NC_010446.5:103277505..103288577:-
ssc_circ_0006381	5	97.8972	24	451.068	0.217034	-2.20401	0.000348756	0.000677012	down	yes	NC_010455.5:206986084..206990757:+
ssc_circ_0005879	16	313.271	2	37.589	8.3341	3.05903	0.00036169	0.000677012	up	yes	NC_010454.4:50266696..50282622:-
ssc_circ_0000292	6	117.477	26	488.658	0.240407	-2.05645	0.000366739	0.000677012	down	yes	NC_010443.5:16406041..16415727:+
ssc_circ_0001509	12	234.953	0	18.7945	12.5012	4.64399	0.000366878	0.000677012	up	yes	NC_010445.4:110335381..110344032:-
ssc_circ_0001647	12	234.953	0	18.7945	12.5012	4.64399	0.000366878	0.000677012	up	yes	NC_010445.4:17693009..17693900:-
ssc_circ_0002133	12	234.953	0	18.7945	12.5012	4.64399	0.000366878	0.000677012	up	yes	NC_010446.5:123945061..123950642:-
ssc_circ_0004637	12	234.953	0	18.7945	12.5012	4.64399	0.000366878	0.000677012	up	yes	NC_010451.4:19852498..19861801:-
ssc_circ_0005909	12	234.953	0	18.7945	12.5012	4.64399	0.000366878	0.000677012	up	yes	NC_010454.4:54396785..54492240:-
ssc_circ_0006051	12	234.953	0	18.7945	12.5012	4.64399	0.000366878	0.000677012	up	yes	NC_010455.5:120778216..120795359:+
ssc_circ_0007246	12	234.953	0	18.7945	12.5012	4.64399	0.000366878	0.000677012	up	yes	NC_010456.5:9478895..9480356:-
ssc_circ_0007248	12	234.953	0	18.7945	12.5012	4.64399	0.000366878	0.000677012	up	yes	NC_010456.5:9478895..9505715:-
ssc_circ_0007420	12	234.953	0	18.7945	12.5012	4.64399	0.000366878	0.000677012	up	yes	NC_010457.5:151025..154802:+
ssc_circ_0007554	12	234.953	0	18.7945	12.5012	4.64399	0.000366878	0.000677012	up	yes	NC_010457.5:66000520..66027687:+
ssc_circ_0007996	12	234.953	0	18.7945	12.5012	4.64399	0.000366878	0.000677012	up	yes	NC_010459.5:36886403..36892010:-
ssc_circ_0008271	12	234.953	0	18.7945	12.5012	4.64399	0.000366878	0.000677012	up	yes	NC_010460.4:44837492..44838430:-
ssc_circ_0001014	22	430.748	54	1014.9	0.424422	-1.23643	0.00037175	0.000684927	down	yes	NC_010444.4:138308109..138308679:+
ssc_circ_0006621	38	744.018	78	1465.97	0.507526	-0.978448	0.000399057	0.000734088	down	yes	NC_010455.5:70778196..70779817:-
ssc_circ_0005093	26	509.065	7	131.562	3.86941	1.95211	0.000439629	0.00080746	up	yes	NC_010452.4:42468077..42479927:-
ssc_circ_0003297	18	352.43	3	56.3836	6.25058	2.64399	0.000442181	0.000809617	up	yes	NC_010448.4:4003874..4015029:-
ssc_circ_0005039	18	352.43	3	56.3836	6.25058	2.64399	0.000442181	0.000809617	up	yes	NC_010452.4:32569928..32588655:-
ssc_circ_0005426	60	1174.77	29	545.041	2.15537	1.10794	0.000449814	0.000822312	up	yes	NC_010453.5:534135..562934:-
ssc_circ_0007544	3	58.7383	19	357.096	0.164489	-2.60394	0.000452489	0.000825918	down	yes	NC_010457.5:63645207..63661287:+
ssc_circ_0003490	18	352.43	47	883.342	0.398973	-1.32564	0.00045583	0.000830725	down	yes	NC_010448.4:89127456..89131566:+
ssc_circ_0001511	22	430.748	5	93.9726	4.58376	2.19653	0.000487987	0.000840248	up	yes	NC_010445.4:110442415..110451455:-
ssc_circ_0007152	36	704.86	13	244.329	2.88488	1.52851	0.000491051	0.000840248	up	yes	NC_010456.5:72044646..72048880:+
ssc_circ_0000330	0	19.5794	12	225.534	0.0868136	-4.52594	0.000516096	0.000840248	down	yes	NC_010443.5:17372568..17416764:-
ssc_circ_0000352	0	19.5794	12	225.534	0.0868136	-4.52594	0.000516096	0.000840248	down	yes	NC_010443.5:180236106..180242224:-
ssc_circ_0000715	0	19.5794	12	225.534	0.0868136	-4.52594	0.000516096	0.000840248	down	yes	NC_010443.5:44163930..44171097:-
ssc_circ_0001666	0	19.5794	12	225.534	0.0868136	-4.52594	0.000516096	0.000840248	down	yes	NC_010445.4:22745957..22746522:+
ssc_circ_0001850	0	19.5794	12	225.534	0.0868136	-4.52594	0.000516096	0.000840248	down	yes	NC_010445.4:48893039..48899041:+
ssc_circ_0002039	0	19.5794	12	225.534	0.0868136	-4.52594	0.000516096	0.000840248	down	yes	NC_010445.4:96249368..96260927:-
ssc_circ_0002537	0	19.5794	12	225.534	0.0868136	-4.52594	0.000516096	0.000840248	down	yes	NC_010447.5:13863474..13876137:-
ssc_circ_0003316	0	19.5794	12	225.534	0.0868136	-4.52594	0.000516096	0.000840248	down	yes	NC_010448.4:44172604..44174756:+
ssc_circ_0006053	0	19.5794	12	225.534	0.0868136	-4.52594	0.000516096	0.000840248	down	yes	NC_010455.5:120788564..120795359:+
ssc_circ_0006360	0	19.5794	12	225.534	0.0868136	-4.52594	0.000516096	0.000840248	down	yes	NC_010455.5:202874107..202875571:-
ssc_circ_0008583	0	19.5794	12	225.534	0.0868136	-4.52594	0.000516096	0.000840248	down	yes	NW_018084979.1:1699023..1707701:-
ssc_circ_0001713	4	78.3177	21	394.685	0.198431	-2.33329	0.000534502	0.000867811	down	yes	NC_010445.4:28645515..28659610:+
ssc_circ_0004586	5	97.8972	23	432.274	0.22647	-2.14261	0.000582411	0.000944292	down	yes	NC_010451.4:127566656..127577646:+
ssc_circ_0002666	7	137.056	27	507.452	0.270087	-1.88851	0.000597411	0.000965947	down	yes	NC_010447.5:3717600..3739361:-
ssc_circ_0003826	7	137.056	27	507.452	0.270087	-1.88851	0.000597411	0.000965947	down	yes	NC_010449.5:58868185..58868520:+
ssc_circ_0003305	6	117.477	25	469.863	0.250023	-1.99987	0.000601184	0.000970713	down	yes	NC_010448.4:43244326..43263216:-
ssc_circ_0001823	2	39.1589	16	300.712	0.13022	-2.94097	0.000605977	0.000975771	down	yes	NC_010445.4:43535845..43540475:+
ssc_circ_0003000	2	39.1589	16	300.712	0.13022	-2.94097	0.000605977	0.000975771	down	yes	NC_010448.4:119404113..119425363:+
ssc_circ_0002997	49	959.392	22	413.479	2.32029	1.21431	0.000645509	0.00101343	up	yes	NC_010448.4:115954027..115957402:+
ssc_circ_0000489	15	293.692	2	37.589	7.81322	2.96592	0.000667341	0.00101343	up	yes	NC_010443.5:218111731..218113349:+
ssc_circ_0002362	15	293.692	2	37.589	7.81322	2.96592	0.000667341	0.00101343	up	yes	NC_010446.5:71965585..72000647:+
ssc_circ_0005698	67	1311.82	35	657.808	1.99423	0.995833	0.000677705	0.00101343	up	yes	NC_010454.4:32060088..32067455:+
ssc_circ_0000922	32	626.542	11	206.74	3.03058	1.5996	0.000681595	0.00101343	up	yes	NC_010444.4:102535641..102539766:-
ssc_circ_0006634	32	626.542	11	206.74	3.03058	1.5996	0.000681595	0.00101343	up	yes	NC_010455.5:73237139..73239444:-
ssc_circ_0000702	11	215.374	0	18.7945	11.4594	4.51846	0.000694026	0.00101343	up	yes	NC_010443.5:33271334..33278592:-
ssc_circ_0000818	11	215.374	0	18.7945	11.4594	4.51846	0.000694026	0.00101343	up	yes	NC_010443.5:77234825..77279692:-
ssc_circ_0000842	11	215.374	0	18.7945	11.4594	4.51846	0.000694026	0.00101343	up	yes	NC_010443.5:82022945..82023413:+
ssc_circ_0001033	11	215.374	0	18.7945	11.4594	4.51846	0.000694026	0.00101343	up	yes	NC_010444.4:141219340..141220554:+
ssc_circ_0002176	11	215.374	0	18.7945	11.4594	4.51846	0.000694026	0.00101343	up	yes	NC_010446.5:129116233..129134916:-
ssc_circ_0003083	11	215.374	0	18.7945	11.4594	4.51846	0.000694026	0.00101343	up	yes	NC_010448.4:150941876..151023867:-
ssc_circ_0004563	11	215.374	0	18.7945	11.4594	4.51846	0.000694026	0.00101343	up	yes	NC_010451.4:124746022..124747461:+
ssc_circ_0004925	11	215.374	0	18.7945	11.4594	4.51846	0.000694026	0.00101343	up	yes	NC_010452.4:12624649..12652349:-
ssc_circ_0005173	11	215.374	0	18.7945	11.4594	4.51846	0.000694026	0.00101343	up	yes	NC_010452.4:53158220..53202893:-
ssc_circ_0005424	11	215.374	0	18.7945	11.4594	4.51846	0.000694026	0.00101343	up	yes	NC_010453.5:51540591..51554792:+
ssc_circ_0005531	11	215.374	0	18.7945	11.4594	4.51846	0.000694026	0.00101343	up	yes	NC_010453.5:9145564..9149581:+
ssc_circ_0005540	11	215.374	0	18.7945	11.4594	4.51846	0.000694026	0.00101343	up	yes	NC_010454.4:11892148..11892556:-
ssc_circ_0006628	11	215.374	0	18.7945	11.4594	4.51846	0.000694026	0.00101343	up	yes	NC_010455.5:72116572..72118925:-
ssc_circ_0006956	11	215.374	0	18.7945	11.4594	4.51846	0.000694026	0.00101343	up	yes	NC_010456.5:29689597..29696108:+
ssc_circ_0007053	11	215.374	0	18.7945	11.4594	4.51846	0.000694026	0.00101343	up	yes	NC_010456.5:55274140..55277629:+
ssc_circ_0007326	11	215.374	0	18.7945	11.4594	4.51846	0.000694026	0.00101343	up	yes	NC_010457.5:112808098..112896614:-
ssc_circ_0007453	11	215.374	0	18.7945	11.4594	4.51846	0.000694026	0.00101343	up	yes	NC_010457.5:29932361..29939777:+
ssc_circ_0008083	11	215.374	0	18.7945	11.4594	4.51846	0.000694026	0.00101343	up	yes	NC_010459.5:53037004..53043217:-
ssc_circ_0003518	25	489.486	7	131.562	3.72058	1.89553	0.000725185	0.00105762	up	yes	NC_010448.4:95091551..95114096:+
ssc_circ_0008214	10	195.794	32	601.425	0.325551	-1.61904	0.00078737	0.00114628	down	yes	NC_010460.4:24985702..25003037:+
ssc_circ_0001650	3	58.7383	18	338.301	0.173627	-2.52594	0.000788904	0.00114628	down	yes	NC_010445.4:18045916..18046140:+
ssc_circ_0005535	3	58.7383	18	338.301	0.173627	-2.52594	0.000788904	0.00114628	down	yes	NC_010453.5:9576209..9579851:-
ssc_circ_0001812	30	587.383	10	187.945	3.12529	1.64399	0.000795538	0.00115449	up	yes	NC_010445.4:4269795..4279580:-
ssc_circ_0004317	21	411.168	5	93.9726	4.3754	2.12942	0.000832923	0.00120725	up	yes	NC_010450.4:69374301..69381214:-
ssc_circ_0003791	19	372.009	4	75.1781	4.94837	2.30695	0.000840382	0.00121656	up	yes	NC_010449.5:56111793..56128677:+
ssc_circ_0000367	9	176.215	30	563.836	0.312529	-1.67794	0.000854278	0.00123516	down	yes	NC_010443.5:182340847..182341782:+
ssc_circ_0006868	66	1292.24	114	2142.58	0.603126	-0.729469	0.000859122	0.00124064	down	yes	NC_010456.5:134281823..134282673:+
ssc_circ_0004364	35	685.28	71	1334.41	0.513545	-0.961437	0.000871528	0.00125636	down	yes	NC_010450.4:84198495..84200866:-
ssc_circ_0007313	21	411.168	50	939.726	0.43754	-1.19251	0.000873094	0.00125636	down	yes	NC_010457.5:110339313..110339943:-
ssc_circ_0000450	8	156.635	28	526.247	0.297647	-1.74833	0.000913442	0.00125636	down	yes	NC_010443.5:206097434..206114157:+
ssc_circ_0002028	8	156.635	28	526.247	0.297647	-1.74833	0.000913442	0.00125636	down	yes	NC_010445.4:94934784..94958933:+
ssc_circ_0005920	8	156.635	28	526.247	0.297647	-1.74833	0.000913442	0.00125636	down	yes	NC_010454.4:56438413..56473522:+
ssc_circ_0000105	0	19.5794	11	206.74	0.0947057	-4.4004	0.000955517	0.00125636	down	yes	NC_010443.5:121192913..121197117:+
ssc_circ_0000411	0	19.5794	11	206.74	0.0947057	-4.4004	0.000955517	0.00125636	down	yes	NC_010443.5:18987938..19005183:-
ssc_circ_0000499	0	19.5794	11	206.74	0.0947057	-4.4004	0.000955517	0.00125636	down	yes	NC_010443.5:223585502..223596456:+
ssc_circ_0000673	0	19.5794	11	206.74	0.0947057	-4.4004	0.000955517	0.00125636	down	yes	NC_010443.5:270096257..270131332:-
ssc_circ_0001124	0	19.5794	11	206.74	0.0947057	-4.4004	0.000955517	0.00125636	down	yes	NC_010444.4:26851839..26852252:-
ssc_circ_0001859	0	19.5794	11	206.74	0.0947057	-4.4004	0.000955517	0.00125636	down	yes	NC_010445.4:5094441..5097362:+
ssc_circ_0002138	0	19.5794	11	206.74	0.0947057	-4.4004	0.000955517	0.00125636	down	yes	NC_010446.5:124468317..124479030:+
ssc_circ_0003053	0	19.5794	11	206.74	0.0947057	-4.4004	0.000955517	0.00125636	down	yes	NC_010448.4:142559834..142602446:+
ssc_circ_0007401	0	19.5794	11	206.74	0.0947057	-4.4004	0.000955517	0.00125636	down	yes	NC_010457.5:137824300..137825447:-
ssc_circ_0007735	0	19.5794	11	206.74	0.0947057	-4.4004	0.000955517	0.00125636	down	yes	NC_010458.4:23740869..23745763:-
ssc_circ_0008499	0	19.5794	11	206.74	0.0947057	-4.4004	0.000955517	0.00125636	down	yes	NC_010461.5:78815102..78845787:+
ssc_circ_0005386	7	137.056	26	488.658	0.280475	-1.83406	0.000958267	0.00125857	down	yes	NC_010453.5:33391961..33392814:+
ssc_circ_0002908	6	117.477	24	451.068	0.260441	-1.94097	0.000979957	0.00128419	down	yes	NC_010448.4:101570971..101577333:+
ssc_circ_0006478	46	900.654	86	1616.33	0.557222	-0.843676	0.00103159	0.00135035	down	yes	NC_010455.5:30729707..30744517:-
ssc_circ_0008604	31	606.962	11	206.74	2.93588	1.55379	0.00106219	0.00138886	up	yes	NW_018084979.1:2281177..2295643:-
ssc_circ_0005087	14	274.112	38	714.192	0.383807	-1.38155	0.0011416	0.00149103	down	yes	NC_010452.4:42147410..42185876:+
ssc_circ_0006519	40	783.177	17	319.507	2.45121	1.29349	0.00120123	0.00155808	up	yes	NC_010455.5:34882055..34882541:-
ssc_circ_0001453	10	195.794	31	582.63	0.336053	-1.57324	0.00121039	0.00155808	down	yes	NC_010445.4:103704319..103773127:-
ssc_circ_0007988	10	195.794	31	582.63	0.336053	-1.57324	0.00121039	0.00155808	down	yes	NC_010459.5:34795182..34795577:-
ssc_circ_0001808	14	274.112	2	37.589	7.29234	2.86638	0.00122831	0.00155808	up	yes	NC_010445.4:4257857..4279580:-
ssc_circ_0002407	14	274.112	2	37.589	7.29234	2.86638	0.00122831	0.00155808	up	yes	NC_010446.5:84853679..84861880:-
ssc_circ_0005865	14	274.112	2	37.589	7.29234	2.86638	0.00122831	0.00155808	up	yes	NC_010454.4:49892777..49895944:-
ssc_circ_0001012	29	567.804	10	187.945	3.02111	1.59508	0.00125064	0.00155808	up	yes	NC_010444.4:137591763..137592492:-
ssc_circ_0001962	29	567.804	10	187.945	3.02111	1.59508	0.00125064	0.00155808	up	yes	NC_010445.4:78952890..78971884:-
ssc_circ_0006204	48	939.813	88	1653.92	0.568234	-0.815442	0.0012623	0.00155808	down	yes	NC_010455.5:147837956..147839301:-
ssc_circ_0000862	23	450.327	52	977.315	0.46078	-1.11785	0.00126671	0.00155808	down	yes	NC_010443.5:8822877..8825081:-
ssc_circ_0004122	22	430.748	6	112.767	3.8198	1.9335	0.00131425	0.00155808	up	yes	NC_010450.4:132123346..132145167:-
ssc_circ_0000587	10	195.794	0	18.7945	10.4176	4.38096	0.00132151	0.00155808	up	yes	NC_010443.5:250949831..250956707:+
ssc_circ_0001241	10	195.794	0	18.7945	10.4176	4.38096	0.00132151	0.00155808	up	yes	NC_010444.4:621540..627163:+
ssc_circ_0001271	10	195.794	0	18.7945	10.4176	4.38096	0.00132151	0.00155808	up	yes	NC_010444.4:69564515..69565336:+
ssc_circ_0001383	10	195.794	0	18.7945	10.4176	4.38096	0.00132151	0.00155808	up	yes	NC_010444.4:8990325..8991248:-
ssc_circ_0001730	10	195.794	0	18.7945	10.4176	4.38096	0.00132151	0.00155808	up	yes	NC_010445.4:31255432..31256666:+
ssc_circ_0002427	10	195.794	0	18.7945	10.4176	4.38096	0.00132151	0.00155808	up	yes	NC_010446.5:90238894..90253801:+
ssc_circ_0005677	10	195.794	0	18.7945	10.4176	4.38096	0.00132151	0.00155808	up	yes	NC_010454.4:26650971..26651453:+
ssc_circ_0007410	10	195.794	0	18.7945	10.4176	4.38096	0.00132151	0.00155808	up	yes	NC_010457.5:138613005..138614428:-
ssc_circ_0008255	10	195.794	0	18.7945	10.4176	4.38096	0.00132151	0.00155808	up	yes	NC_010460.4:40367081..40381716:-
ssc_circ_0000040	9	176.215	29	545.041	0.323306	-1.62903	0.00132711	0.00156155	down	yes	NC_010443.5:108482616..108486823:-
ssc_circ_0005112	9	176.215	29	545.041	0.323306	-1.62903	0.00132711	0.00156155	down	yes	NC_010452.4:45139215..45142435:+
ssc_circ_0003231	3	58.7383	17	319.507	0.183841	-2.44347	0.00136951	0.00160502	down	yes	NC_010448.4:28931494..28932927:+
ssc_circ_0004373	3	58.7383	17	319.507	0.183841	-2.44347	0.00136951	0.00160502	down	yes	NC_010450.4:87641604..87664522:-
ssc_circ_0004781	3	58.7383	17	319.507	0.183841	-2.44347	0.00136951	0.00160502	down	yes	NC_010451.4:571438..613151:+
ssc_circ_0008474	3	58.7383	17	319.507	0.183841	-2.44347	0.00136951	0.00160502	down	yes	NC_010461.5:61720719..61735982:-
ssc_circ_0004986	20	391.589	5	93.9726	4.16705	2.05903	0.00141303	0.00165437	up	yes	NC_010452.4:20438111..20481282:-
ssc_circ_0006850	41	802.757	18	338.301	2.3729	1.24665	0.00144316	0.00168796	up	yes	NC_010456.5:131238819..131262177:-
ssc_circ_0000520	27	528.645	9	169.151	3.12529	1.64399	0.00146183	0.00170641	up	yes	NC_010443.5:229022737..229060398:+
ssc_circ_0003213	27	528.645	9	169.151	3.12529	1.64399	0.00146183	0.00170641	up	yes	NC_010448.4:27526548..27533552:-
ssc_circ_0007614	12	234.953	34	639.014	0.367681	-1.44347	0.00146953	0.00171369	down	yes	NC_010457.5:77249916..77283482:-
ssc_circ_0003507	7	137.056	25	469.863	0.291694	-1.77747	0.00152766	0.00177972	down	yes	NC_010448.4:92155928..92170345:+
ssc_circ_0007642	4	78.3177	19	357.096	0.219319	-2.1889	0.00153351	0.00178476	down	yes	NC_010457.5:84220498..84225453:+
ssc_circ_0004541	30	587.383	11	206.74	2.84117	1.50649	0.00164431	0.00187116	up	yes	NC_010451.4:121610724..121631279:+
ssc_circ_0008270	19	372.009	45	845.753	0.439855	-1.1849	0.00168029	0.00187116	down	yes	NC_010460.4:44166842..44186515:-
ssc_circ_0004058	14	274.112	37	695.397	0.394181	-1.34307	0.00168105	0.00187116	down	yes	NC_010450.4:112677571..112678436:-
ssc_circ_0005536	25	489.486	8	150.356	3.25551	1.70288	0.0016925	0.00187116	up	yes	NC_010453.5:998514..1007418:+
ssc_circ_0005586	42	822.336	19	357.096	2.30284	1.20342	0.00171209	0.00187116	up	yes	NC_010454.4:1492107..1494267:+
ssc_circ_0007595	42	822.336	19	357.096	2.30284	1.20342	0.00171209	0.00187116	up	yes	NC_010457.5:76166995..76177857:+
ssc_circ_0000933	33	646.121	13	244.329	2.64448	1.40298	0.00174532	0.00187116	up	yes	NC_010444.4:114338109..114371287:-
ssc_circ_0008617	25	489.486	54	1014.9	0.482298	-1.052	0.00176677	0.00187116	down	yes	NW_018085128.1:27615..36179:+
ssc_circ_0001653	0	19.5794	10	187.945	0.104176	-4.2629	0.00177966	0.00187116	down	yes	NC_010445.4:18069859..18074367:+
ssc_circ_0004023	0	19.5794	10	187.945	0.104176	-4.2629	0.00177966	0.00187116	down	yes	NC_010450.4:101138023..101161498:-
ssc_circ_0004514	0	19.5794	10	187.945	0.104176	-4.2629	0.00177966	0.00187116	down	yes	NC_010451.4:118058399..118083148:-
ssc_circ_0005243	0	19.5794	10	187.945	0.104176	-4.2629	0.00177966	0.00187116	down	yes	NC_010452.4:68562244..68562567:-
ssc_circ_0005430	0	19.5794	10	187.945	0.104176	-4.2629	0.00177966	0.00187116	down	yes	NC_010453.5:5503065..5524214:+
ssc_circ_0005600	0	19.5794	10	187.945	0.104176	-4.2629	0.00177966	0.00187116	down	yes	NC_010454.4:16180053..16211961:-
ssc_circ_0006989	0	19.5794	10	187.945	0.104176	-4.2629	0.00177966	0.00187116	down	yes	NC_010456.5:36101382..36101619:+
ssc_circ_0007105	0	19.5794	10	187.945	0.104176	-4.2629	0.00177966	0.00187116	down	yes	NC_010456.5:66664982..66666186:-
ssc_circ_0007343	0	19.5794	10	187.945	0.104176	-4.2629	0.00177966	0.00187116	down	yes	NC_010457.5:118367910..118411610:+
ssc_circ_0007488	0	19.5794	10	187.945	0.104176	-4.2629	0.00177966	0.00187116	down	yes	NC_010457.5:46425015..46430362:-
ssc_circ_0007535	0	19.5794	10	187.945	0.104176	-4.2629	0.00177966	0.00187116	down	yes	NC_010457.5:60396962..60403463:-
ssc_circ_0007581	0	19.5794	10	187.945	0.104176	-4.2629	0.00177966	0.00187116	down	yes	NC_010457.5:7586373..7591848:+
ssc_circ_0002822	44	861.495	81	1522.36	0.565896	-0.821391	0.00185375	0.00194732	down	yes	NC_010447.5:79458763..79460620:-
ssc_circ_0000100	23	450.327	7	131.562	3.42294	1.77523	0.00193478	0.00202998	up	yes	NC_010443.5:12041132..12043885:-
ssc_circ_0001734	2	39.1589	14	263.123	0.148823	-2.74833	0.00194108	0.00202998	down	yes	NC_010445.4:31357057..31359294:+
ssc_circ_0003624	2	39.1589	14	263.123	0.148823	-2.74833	0.00194108	0.00202998	down	yes	NC_010449.5:117977699..117982826:+
ssc_circ_0005253	2	39.1589	14	263.123	0.148823	-2.74833	0.00194108	0.00202998	down	yes	NC_010452.4:68959424..68970531:+
ssc_circ_0005903	9	176.215	28	526.247	0.334852	-1.5784	0.00204844	0.00213846	down	yes	NC_010454.4:53623053..53633146:+
ssc_circ_0006145	9	176.215	28	526.247	0.334852	-1.5784	0.00204844	0.00213846	down	yes	NC_010455.5:134515277..134527329:+
ssc_circ_0008178	58	1135.61	31	582.63	1.9491	0.962812	0.00210871	0.00219942	up	yes	NC_010460.4:17598680..17629822:-
ssc_circ_0008222	21	411.168	6	112.767	3.64617	1.86638	0.00217335	0.00226482	up	yes	NC_010460.4:2648872..2661452:-
ssc_circ_0008081	8	156.635	26	488.658	0.320542	-1.64141	0.00224331	0.00233359	down	yes	NC_010459.5:52987380..52998000:-
ssc_circ_0008311	8	156.635	26	488.658	0.320542	-1.64141	0.00224331	0.00233359	down	yes	NC_010460.4:54348426..54404485:-
ssc_circ_0004064	13	254.533	2	37.589	6.77146	2.75947	0.00225407	0.00233858	up	yes	NC_010450.4:113967111..113982056:-
ssc_circ_0004679	13	254.533	2	37.589	6.77146	2.75947	0.00225407	0.00233858	up	yes	NC_010451.4:26899161..26905802:+
ssc_circ_0000780	26	509.065	9	169.151	3.00954	1.58954	0.00230475	0.00236959	up	yes	NC_010443.5:71059257..71082722:-
ssc_circ_0004824	26	509.065	9	169.151	3.00954	1.58954	0.00230475	0.00236959	up	yes	NC_010451.4:72153385..72160471:-
ssc_circ_0003623	3	58.7383	16	300.712	0.195331	-2.35601	0.00236585	0.00236959	down	yes	NC_010449.5:117718801..117735703:+
ssc_circ_0004335	3	58.7383	16	300.712	0.195331	-2.35601	0.00236585	0.00236959	down	yes	NC_010450.4:74913874..74914085:+
ssc_circ_0001908	19	372.009	5	93.9726	3.9587	1.98503	0.00238121	0.00236959	up	yes	NC_010445.4:69262709..69269649:-
ssc_circ_0006652	7	137.056	24	451.068	0.303848	-1.71858	0.00241941	0.00236959	down	yes	NC_010455.5:77068767..77075075:+
ssc_circ_0001018	25	489.486	53	996.11	0.491398	-1.02504	0.00242535	0.00236959	down	yes	NC_010444.4:140023010..140031581:-
ssc_circ_0006307	11	215.374	31	582.63	0.369658	-1.43574	0.00248798	0.00236959	down	yes	NC_010455.5:19614009..19620366:+
ssc_circ_0003285	15	293.692	3	56.3836	5.20881	2.38096	0.00250282	0.00236959	up	yes	NC_010448.4:37957475..37959217:+
ssc_circ_0003362	15	293.692	3	56.3836	5.20881	2.38096	0.00250282	0.00236959	up	yes	NC_010448.4:54722894..54723246:+
ssc_circ_0003465	15	293.692	3	56.3836	5.20881	2.38096	0.00250282	0.00236959	up	yes	NC_010448.4:84934413..84951139:+
ssc_circ_0004816	15	293.692	3	56.3836	5.20881	2.38096	0.00250282	0.00236959	up	yes	NC_010451.4:70943455..71002109:+
ssc_circ_0007185	17	332.85	4	75.1781	4.42749	2.14649	0.00251389	0.00236959	up	yes	NC_010456.5:75890549..75897301:-
ssc_circ_0005175	110	2153.74	73	1372	1.56978	0.650562	0.00251673	0.00236959	up	yes	NC_010452.4:53169687..53202893:-
ssc_circ_0000210	9	176.215	0	18.7945	9.37587	4.22895	0.00253392	0.00236959	up	yes	NC_010443.5:139791489..139791984:-
ssc_circ_0001059	9	176.215	0	18.7945	9.37587	4.22895	0.00253392	0.00236959	up	yes	NC_010444.4:147515855..147525270:-
ssc_circ_0002384	9	176.215	0	18.7945	9.37587	4.22895	0.00253392	0.00236959	up	yes	NC_010446.5:79764181..79766530:+
ssc_circ_0002459	9	176.215	0	18.7945	9.37587	4.22895	0.00253392	0.00236959	up	yes	NC_010446.5:94405984..94418263:+
ssc_circ_0002778	9	176.215	0	18.7945	9.37587	4.22895	0.00253392	0.00236959	up	yes	NC_010447.5:69698164..69699221:+
ssc_circ_0003183	9	176.215	0	18.7945	9.37587	4.22895	0.00253392	0.00236959	up	yes	NC_010448.4:17352018..17356850:-
ssc_circ_0003244	9	176.215	0	18.7945	9.37587	4.22895	0.00253392	0.00236959	up	yes	NC_010448.4:31388854..31404916:-
ssc_circ_0003654	9	176.215	0	18.7945	9.37587	4.22895	0.00253392	0.00236959	up	yes	NC_010449.5:20283341..20289763:+
ssc_circ_0004000	9	176.215	0	18.7945	9.37587	4.22895	0.00253392	0.00236959	up	yes	NC_010449.5:96543074..96555754:+
ssc_circ_0004466	9	176.215	0	18.7945	9.37587	4.22895	0.00253392	0.00236959	up	yes	NC_010451.4:11061550..11108098:+
ssc_circ_0005512	9	176.215	0	18.7945	9.37587	4.22895	0.00253392	0.00236959	up	yes	NC_010453.5:78343010..78352808:+
ssc_circ_0005742	9	176.215	0	18.7945	9.37587	4.22895	0.00253392	0.00236959	up	yes	NC_010454.4:36458277..36461144:+
ssc_circ_0005821	9	176.215	0	18.7945	9.37587	4.22895	0.00253392	0.00236959	up	yes	NC_010454.4:43096806..43097800:+
ssc_circ_0006159	9	176.215	0	18.7945	9.37587	4.22895	0.00253392	0.00236959	up	yes	NC_010455.5:135019965..135062178:+
ssc_circ_0006623	9	176.215	0	18.7945	9.37587	4.22895	0.00253392	0.00236959	up	yes	NC_010455.5:71719658..71720414:+
ssc_circ_0007536	9	176.215	0	18.7945	9.37587	4.22895	0.00253392	0.00236959	up	yes	NC_010457.5:60397513..60403463:-
ssc_circ_0008602	9	176.215	0	18.7945	9.37587	4.22895	0.00253392	0.00236959	up	yes	NW_018084979.1:2196760..2208500:+
ssc_circ_0006253	32	626.542	63	1184.05	0.529149	-0.918253	0.00254982	0.00238256	down	yes	NC_010455.5:168854244..168855082:+
ssc_circ_0003939	6	117.477	22	413.479	0.284117	-1.81544	0.00255557	0.00238603	down	yes	NC_010449.5:80345062..80346071:+
ssc_circ_0004645	38	744.018	17	319.507	2.32865	1.21949	0.00257501	0.00240076	up	yes	NC_010451.4:19885865..19913189:-
ssc_circ_0002511	4	78.3177	18	338.301	0.231503	-2.1109	0.00257543	0.00240076	down	yes	NC_010447.5:101775243..101795355:+
ssc_circ_0008088	5	97.8972	20	375.89	0.260441	-1.94097	0.0026214	0.00244168	down	yes	NC_010459.5:58621631..58643708:+
ssc_circ_0002810	45	881.075	81	1522.36	0.578757	-0.78897	0.00264087	0.00245786	down	yes	NC_010447.5:76839521..76844589:-
ssc_circ_0000796	45	881.075	22	413.479	2.13088	1.09145	0.00268283	0.00249494	up	yes	NC_010443.5:7594612..7598381:+
ssc_circ_0007652	24	469.906	8	150.356	3.12529	1.64399	0.00269877	0.00250779	up	yes	NC_010457.5:88482354..88486742:-
ssc_circ_0004814	10	195.794	29	545.041	0.359229	-1.47703	0.00280596	0.00260532	down	yes	NC_010451.4:70821197..70835752:+
ssc_circ_0005448	26	509.065	54	1014.9	0.50159	-0.995421	0.00280937	0.00260643	down	yes	NC_010453.5:6556534..6560872:-
ssc_circ_0004629	42	822.336	20	375.89	2.1877	1.12942	0.0028706	0.00266115	up	yes	NC_010451.4:17351072..17398149:+
ssc_circ_0003560	61	1194.35	102	1917.04	0.623015	-0.682661	0.00293739	0.00272092	down	yes	NC_010448.4:99163771..99166743:-
ssc_circ_0005440	55	1076.87	94	1766.68	0.609542	-0.714202	0.00297184	0.00275066	down	yes	NC_010453.5:603753..604571:-
ssc_circ_0002185	22	430.748	7	131.562	3.27411	1.7111	0.00312623	0.00279279	up	yes	NC_010446.5:130580135..130587915:+
ssc_circ_0001454	9	176.215	27	507.452	0.347254	-1.52594	0.00314043	0.00279279	down	yes	NC_010445.4:103726106..103727478:-
ssc_circ_0000221	39	763.598	72	1353.21	0.564288	-0.825496	0.00320798	0.00279279	down	yes	NC_010443.5:145568782..145572777:+
ssc_circ_0004395	17	332.85	40	751.781	0.442749	-1.17544	0.00325039	0.00279279	down	yes	NC_010450.4:964857..968127:+
ssc_circ_0000369	0	19.5794	9	169.151	0.115751	-4.1109	0.00333573	0.00279279	down	yes	NC_010443.5:182344156..182348499:+
ssc_circ_0000679	0	19.5794	9	169.151	0.115751	-4.1109	0.00333573	0.00279279	down	yes	NC_010443.5:271368900..271377311:+
ssc_circ_0001549	0	19.5794	9	169.151	0.115751	-4.1109	0.00333573	0.00279279	down	yes	NC_010445.4:11733629..11736046:+
ssc_circ_0002240	0	19.5794	9	169.151	0.115751	-4.1109	0.00333573	0.00279279	down	yes	NC_010446.5:3131460..3137676:+
ssc_circ_0002269	0	19.5794	9	169.151	0.115751	-4.1109	0.00333573	0.00279279	down	yes	NC_010446.5:38957345..38967502:-
ssc_circ_0002350	0	19.5794	9	169.151	0.115751	-4.1109	0.00333573	0.00279279	down	yes	NC_010446.5:68935650..68958236:-
ssc_circ_0003666	0	19.5794	9	169.151	0.115751	-4.1109	0.00333573	0.00279279	down	yes	NC_010449.5:229160..246213:-
ssc_circ_0003686	0	19.5794	9	169.151	0.115751	-4.1109	0.00333573	0.00279279	down	yes	NC_010449.5:28639544..28643064:+
ssc_circ_0003954	0	19.5794	9	169.151	0.115751	-4.1109	0.00333573	0.00279279	down	yes	NC_010449.5:86064996..86087677:-
ssc_circ_0004197	0	19.5794	9	169.151	0.115751	-4.1109	0.00333573	0.00279279	down	yes	NC_010450.4:279183..280910:-
ssc_circ_0004237	0	19.5794	9	169.151	0.115751	-4.1109	0.00333573	0.00279279	down	yes	NC_010450.4:38624605..38653235:-
ssc_circ_0004272	0	19.5794	9	169.151	0.115751	-4.1109	0.00333573	0.00279279	down	yes	NC_010450.4:47635845..47645123:+
ssc_circ_0005466	0	19.5794	9	169.151	0.115751	-4.1109	0.00333573	0.00279279	down	yes	NC_010453.5:68173040..68181097:+
ssc_circ_0006335	0	19.5794	9	169.151	0.115751	-4.1109	0.00333573	0.00279279	down	yes	NC_010455.5:200707866..200721908:+
ssc_circ_0006869	0	19.5794	9	169.151	0.115751	-4.1109	0.00333573	0.00279279	down	yes	NC_010456.5:134376834..134438668:-
ssc_circ_0007590	0	19.5794	9	169.151	0.115751	-4.1109	0.00333573	0.00279279	down	yes	NC_010457.5:76013252..76014397:+
ssc_circ_0007828	0	19.5794	9	169.151	0.115751	-4.1109	0.00333573	0.00279279	down	yes	NC_010458.4:47882641..47883657:+
ssc_circ_0002169	19	372.009	43	808.164	0.460314	-1.11931	0.00334472	0.00279833	down	yes	NC_010446.5:125831440..125835266:+
ssc_circ_0003905	21	411.168	46	864.548	0.475587	-1.07222	0.00337897	0.00282496	down	yes	NC_010449.5:68514625..68521235:+
ssc_circ_0003368	2	39.1589	13	244.329	0.160271	-2.64141	0.00345719	0.00287808	down	yes	NC_010448.4:586614..589023:+
ssc_circ_0005707	2	39.1589	13	244.329	0.160271	-2.64141	0.00345719	0.00287808	down	yes	NC_010454.4:34980903..35008491:+
ssc_circ_0007555	2	39.1589	13	244.329	0.160271	-2.64141	0.00345719	0.00287808	down	yes	NC_010457.5:66027487..66027687:+
ssc_circ_0007469	40	783.177	19	357.096	2.19319	1.13303	0.00353582	0.00294145	up	yes	NC_010457.5:4136904..4150279:+
ssc_circ_0007798	14	274.112	35	657.808	0.416705	-1.2629	0.00357775	0.00297423	down	yes	NC_010458.4:43984409..44011065:-
ssc_circ_0001988	25	489.486	9	169.151	2.89379	1.53296	0.00360644	0.00299597	up	yes	NC_010445.4:85611405..85622090:+
ssc_circ_0002712	11	215.374	30	563.836	0.38198	-1.38843	0.00371681	0.00308112	down	yes	NC_010447.5:53633123..53659626:-
ssc_circ_0005241	11	215.374	30	563.836	0.38198	-1.38843	0.00371681	0.00308112	down	yes	NC_010452.4:68509412..68518239:-
ssc_circ_0007309	11	215.374	30	563.836	0.38198	-1.38843	0.00371681	0.00308112	down	yes	NC_010457.5:109436411..109441836:-
ssc_circ_0001655	7	137.056	23	432.274	0.317058	-1.65718	0.00380478	0.00314296	down	yes	NC_010445.4:18470135..18470486:+
ssc_circ_0001727	7	137.056	23	432.274	0.317058	-1.65718	0.00380478	0.00314296	down	yes	NC_010445.4:31250811..31253767:+
ssc_circ_0002847	7	137.056	23	432.274	0.317058	-1.65718	0.00380478	0.00314296	down	yes	NC_010447.5:82799606..82804808:+
ssc_circ_0005560	7	137.056	23	432.274	0.317058	-1.65718	0.00380478	0.00314296	down	yes	NC_010454.4:14465466..14471485:+
ssc_circ_0007860	7	137.056	23	432.274	0.317058	-1.65718	0.00380478	0.00314296	down	yes	NC_010458.4:55385796..55397890:-
ssc_circ_0003255	28	548.224	11	206.74	2.65176	1.40695	0.00385669	0.00318361	up	yes	NC_010448.4:34714334..34725179:-
ssc_circ_0008601	31	606.962	13	244.329	2.4842	1.31278	0.0039296	0.00324151	up	yes	NW_018084979.1:2193313..2193727:+
ssc_circ_0007397	18	352.43	5	93.9726	3.75035	1.90702	0.00398347	0.00328365	up	yes	NC_010457.5:135707739..135716699:+
ssc_circ_0007216	3	58.7383	15	281.918	0.208353	-2.2629	0.0040645	0.0033481	down	yes	NC_010456.5:87093223..87093507:-
ssc_circ_0007870	6	117.477	21	394.685	0.297647	-1.74833	0.00408449	0.0033622	down	yes	NC_010458.4:64257835..64266685:+
ssc_circ_0002209	12	234.953	2	37.589	6.25058	2.64399	0.00412131	0.00338067	up	yes	NC_010446.5:22989684..22990287:+
ssc_circ_0002701	12	234.953	2	37.589	6.25058	2.64399	0.00412131	0.00338067	up	yes	NC_010447.5:51558424..51561815:+
ssc_circ_0003444	12	234.953	2	37.589	6.25058	2.64399	0.00412131	0.00338067	up	yes	NC_010448.4:79875804..79876991:-
ssc_circ_0005858	12	234.953	2	37.589	6.25058	2.64399	0.00412131	0.00338067	up	yes	NC_010454.4:48503094..48503900:-
ssc_circ_0000097	10	195.794	28	526.247	0.372058	-1.4264	0.00422847	0.00346616	down	yes	NC_010443.5:119905146..119909321:-
ssc_circ_0004172	23	450.327	8	150.356	2.99507	1.58259	0.00427004	0.00349536	up	yes	NC_010450.4:167697..171693:+
ssc_circ_0001395	45	881.075	23	432.274	2.03823	1.02732	0.00427491	0.00349691	up	yes	NC_010444.4:91768020..91773257:+
ssc_circ_0001592	81	1585.93	51	958.52	1.65456	0.726452	0.0042825	0.00350069	up	yes	NC_010445.4:125943043..125943717:+
ssc_circ_0002280	4	78.3177	17	319.507	0.245121	-2.02844	0.00429722	0.00350297	down	yes	NC_010446.5:39934333..39947397:-
ssc_circ_0003301	4	78.3177	17	319.507	0.245121	-2.02844	0.00429722	0.00350297	down	yes	NC_010448.4:42537042..42539106:-
ssc_circ_0008351	4	78.3177	17	319.507	0.245121	-2.02844	0.00429722	0.00350297	down	yes	NC_010461.5:101525185..101536227:+
ssc_circ_0001039	16	313.271	4	75.1781	4.16705	2.05903	0.00430456	0.00350653	up	yes	NC_010444.4:141440312..141457233:+
ssc_circ_0006943	71	1390.14	43	808.164	1.72012	0.782509	0.00433483	0.00352874	up	yes	NC_010456.5:29281864..29290551:-
ssc_circ_0002214	14	274.112	3	56.3836	4.86156	2.28142	0.00441217	0.00353451	up	yes	NC_010446.5:2738960..2760683:+
ssc_circ_0006459	14	274.112	3	56.3836	4.86156	2.28142	0.00441217	0.00353451	up	yes	NC_010455.5:30516967..30524999:-
ssc_circ_0006701	14	274.112	3	56.3836	4.86156	2.28142	0.00441217	0.00353451	up	yes	NC_010455.5:86452535..86471251:-
ssc_circ_0003220	32	626.542	61	1146.47	0.546499	-0.87171	0.00449161	0.00353451	down	yes	NC_010448.4:28311909..28312248:-
ssc_circ_0004600	43	841.916	76	1428.38	0.589419	-0.762636	0.00468375	0.00353451	down	yes	NC_010451.4:130326633..130384896:-
ssc_circ_0000412	9	176.215	26	488.658	0.36061	-1.47149	0.00477995	0.00353451	down	yes	NC_010443.5:190648253..190649258:+
ssc_circ_0001255	29	567.804	12	225.534	2.51759	1.33205	0.00479281	0.00353451	up	yes	NC_010444.4:65978292..65980624:-
ssc_circ_0004060	29	567.804	12	225.534	2.51759	1.33205	0.00479281	0.00353451	up	yes	NC_010450.4:112685624..112686605:-
ssc_circ_0000819	8	156.635	0	18.7945	8.3341	4.05903	0.00489518	0.00353451	up	yes	NC_010443.5:77254058..77279692:-
ssc_circ_0000899	8	156.635	0	18.7945	8.3341	4.05903	0.00489518	0.00353451	up	yes	NC_010443.5:96493194..96516009:-
ssc_circ_0001189	8	156.635	0	18.7945	8.3341	4.05903	0.00489518	0.00353451	up	yes	NC_010444.4:47170673..47171374:-
ssc_circ_0001337	8	156.635	0	18.7945	8.3341	4.05903	0.00489518	0.00353451	up	yes	NC_010444.4:82200380..82200981:+
ssc_circ_0002243	8	156.635	0	18.7945	8.3341	4.05903	0.00489518	0.00353451	up	yes	NC_010446.5:31972148..31996226:-
ssc_circ_0002454	8	156.635	0	18.7945	8.3341	4.05903	0.00489518	0.00353451	up	yes	NC_010446.5:94324418..94353369:+
ssc_circ_0002566	8	156.635	0	18.7945	8.3341	4.05903	0.00489518	0.00353451	up	yes	NC_010447.5:21239122..21246187:-
ssc_circ_0002600	8	156.635	0	18.7945	8.3341	4.05903	0.00489518	0.00353451	up	yes	NC_010447.5:27173898..27175753:+
ssc_circ_0002891	8	156.635	0	18.7945	8.3341	4.05903	0.00489518	0.00353451	up	yes	NC_010447.5:92992680..92993106:+
ssc_circ_0003865	8	156.635	0	18.7945	8.3341	4.05903	0.00489518	0.00353451	up	yes	NC_010449.5:65044494..65052806:+
ssc_circ_0003909	8	156.635	0	18.7945	8.3341	4.05903	0.00489518	0.00353451	up	yes	NC_010449.5:68514625..68539413:+
ssc_circ_0004667	8	156.635	0	18.7945	8.3341	4.05903	0.00489518	0.00353451	up	yes	NC_010451.4:234482..245431:+
ssc_circ_0004696	8	156.635	0	18.7945	8.3341	4.05903	0.00489518	0.00353451	up	yes	NC_010451.4:33043520..33061432:+
ssc_circ_0005810	8	156.635	0	18.7945	8.3341	4.05903	0.00489518	0.00353451	up	yes	NC_010454.4:42741473..42758003:-
ssc_circ_0006320	8	156.635	0	18.7945	8.3341	4.05903	0.00489518	0.00353451	up	yes	NC_010455.5:197360626..197370804:+
ssc_circ_0006615	8	156.635	0	18.7945	8.3341	4.05903	0.00489518	0.00353451	up	yes	NC_010455.5:69443305..69445921:+
ssc_circ_0006624	8	156.635	0	18.7945	8.3341	4.05903	0.00489518	0.00353451	up	yes	NC_010455.5:71794794..71797638:-
ssc_circ_0006747	8	156.635	0	18.7945	8.3341	4.05903	0.00489518	0.00353451	up	yes	NC_010456.5:103576341..103593505:+
ssc_circ_0007398	8	156.635	0	18.7945	8.3341	4.05903	0.00489518	0.00353451	up	yes	NC_010457.5:135924097..135931508:+
ssc_circ_0007758	8	156.635	0	18.7945	8.3341	4.05903	0.00489518	0.00353451	up	yes	NC_010458.4:34555976..34590178:+
ssc_circ_0008298	8	156.635	0	18.7945	8.3341	4.05903	0.00489518	0.00353451	up	yes	NC_010460.4:52417988..52495626:+
ssc_circ_0008378	8	156.635	0	18.7945	8.3341	4.05903	0.00489518	0.00353451	up	yes	NC_010461.5:122310312..122331263:+
ssc_circ_0008448	8	156.635	0	18.7945	8.3341	4.05903	0.00489518	0.00353451	up	yes	NC_010461.5:54286536..54293347:-
ssc_circ_0005937	21	411.168	7	131.562	3.12529	1.64399	0.00501133	0.00361615	up	yes	NC_010454.4:59319172..59323398:+
ssc_circ_0006651	60	1174.77	35	657.808	1.78588	0.836635	0.00547967	0.00395168	up	yes	NC_010455.5:75615215..75652667:+
ssc_circ_0005041	20	391.589	43	808.164	0.484541	-1.04531	0.00551099	0.00397183	down	yes	NC_010452.4:32800584..32819154:+
ssc_circ_0002970	24	469.906	9	169.151	2.77803	1.47406	0.00559825	0.00402731	up	yes	NC_010448.4:109117107..109141734:-
ssc_circ_0004365	24	469.906	9	169.151	2.77803	1.47406	0.00559825	0.00402731	up	yes	NC_010450.4:84198495..84209728:-
ssc_circ_0006192	24	469.906	9	169.151	2.77803	1.47406	0.00559825	0.00402731	up	yes	NC_010455.5:146211073..146212596:+
ssc_circ_0000093	19	372.009	6	112.767	3.29892	1.72199	0.00580845	0.00417597	up	yes	NC_010443.5:119735151..119740313:-
ssc_circ_0002896	7	137.056	22	413.479	0.33147	-1.59305	0.00593832	0.00420187	down	yes	NC_010447.5:94479159..94482115:-
ssc_circ_0001366	2	39.1589	12	225.534	0.173627	-2.52594	0.00613204	0.00420187	down	yes	NC_010444.4:88057795..88070008:+
ssc_circ_0003739	2	39.1589	12	225.534	0.173627	-2.52594	0.00613204	0.00420187	down	yes	NC_010449.5:4574943..4608689:+
ssc_circ_0004711	2	39.1589	12	225.534	0.173627	-2.52594	0.00613204	0.00420187	down	yes	NC_010451.4:36533552..36536941:+
ssc_circ_0007148	2	39.1589	12	225.534	0.173627	-2.52594	0.00613204	0.00420187	down	yes	NC_010456.5:71999543..72004798:+
ssc_circ_0000005	0	19.5794	8	150.356	0.13022	-3.94097	0.00629487	0.00420187	down	yes	NC_010443.5:100589850..100626668:+
ssc_circ_0000041	0	19.5794	8	150.356	0.13022	-3.94097	0.00629487	0.00420187	down	yes	NC_010443.5:108687861..108689101:+
ssc_circ_0000999	0	19.5794	8	150.356	0.13022	-3.94097	0.00629487	0.00420187	down	yes	NC_010444.4:135382165..135384743:+
ssc_circ_0001485	0	19.5794	8	150.356	0.13022	-3.94097	0.00629487	0.00420187	down	yes	NC_010445.4:107317577..107324947:-
ssc_circ_0004036	0	19.5794	8	150.356	0.13022	-3.94097	0.00629487	0.00420187	down	yes	NC_010450.4:103313633..103321590:+
ssc_circ_0005963	0	19.5794	8	150.356	0.13022	-3.94097	0.00629487	0.00420187	down	yes	NC_010454.4:60175882..60184718:-
ssc_circ_0006280	0	19.5794	8	150.356	0.13022	-3.94097	0.00629487	0.00420187	down	yes	NC_010455.5:18526605..18529971:-
ssc_circ_0007375	0	19.5794	8	150.356	0.13022	-3.94097	0.00629487	0.00420187	down	yes	NC_010457.5:131893711..131896945:+
ssc_circ_0003738	15	293.692	35	657.808	0.44647	-1.16337	0.00632804	0.00421921	down	yes	NC_010449.5:4574943..4584896:+
ssc_circ_0007809	6	117.477	20	375.89	0.312529	-1.67794	0.00647839	0.00431701	down	yes	NC_010458.4:44515801..44517349:+
ssc_circ_0000028	50	978.972	84	1578.74	0.620097	-0.689434	0.00648352	0.00431798	down	yes	NC_010443.5:106923369..106924847:-
ssc_circ_0000009	17	332.85	5	93.9726	3.54199	1.82456	0.00661036	0.00439498	up	yes	NC_010443.5:10070672..10175846:-
ssc_circ_0000122	17	332.85	5	93.9726	3.54199	1.82456	0.00661036	0.00439498	up	yes	NC_010443.5:123323801..123330654:+
ssc_circ_0001052	5	97.8972	18	338.301	0.289379	-1.78897	0.00690868	0.00458554	down	yes	NC_010444.4:143714160..143728301:+
ssc_circ_0002006	5	97.8972	18	338.301	0.289379	-1.78897	0.00690868	0.00458554	down	yes	NC_010445.4:87308888..87310440:+
ssc_circ_0002801	3	58.7383	14	263.123	0.223235	-2.16337	0.00693896	0.00459526	down	yes	NC_010447.5:73631382..73653060:+
ssc_circ_0003349	3	58.7383	14	263.123	0.223235	-2.16337	0.00693896	0.00459526	down	yes	NC_010448.4:52977944..52992912:+
ssc_circ_0006499	3	58.7383	14	263.123	0.223235	-2.16337	0.00693896	0.00459526	down	yes	NC_010455.5:32471840..32506478:+
ssc_circ_0005517	25	489.486	10	187.945	2.60441	1.38096	0.00710101	0.0046983	up	yes	NC_010453.5:78382356..78383968:+
ssc_circ_0003381	4	78.3177	16	300.712	0.260441	-1.94097	0.00711853	0.0046983	down	yes	NC_010448.4:67634953..67640257:+
ssc_circ_0005007	4	78.3177	16	300.712	0.260441	-1.94097	0.00711853	0.0046983	down	yes	NC_010452.4:24788311..24799565:-
ssc_circ_0006230	4	78.3177	16	300.712	0.260441	-1.94097	0.00711853	0.0046983	down	yes	NC_010455.5:158685847..158688234:-
ssc_circ_0007009	4	78.3177	16	300.712	0.260441	-1.94097	0.00711853	0.0046983	down	yes	NC_010456.5:40712179..40715025:-
ssc_circ_0000024	9	176.215	25	469.863	0.375035	-1.4149	0.00721993	0.00475988	down	yes	NC_010443.5:106913171..106917338:-
ssc_circ_0001292	9	176.215	25	469.863	0.375035	-1.4149	0.00721993	0.00475988	down	yes	NC_010444.4:76582777..76583208:-
ssc_circ_0002158	15	293.692	4	75.1781	3.90661	1.96592	0.00731395	0.0048057	up	yes	NC_010446.5:125137452..125195250:+
ssc_circ_0002164	15	293.692	4	75.1781	3.90661	1.96592	0.00731395	0.0048057	up	yes	NC_010446.5:125770853..125783720:+
ssc_circ_0007311	15	293.692	4	75.1781	3.90661	1.96592	0.00731395	0.0048057	up	yes	NC_010457.5:109452836..109455348:+
ssc_circ_0007840	15	293.692	4	75.1781	3.90661	1.96592	0.00731395	0.0048057	up	yes	NC_010458.4:50890851..50957013:-
ssc_circ_0007947	15	293.692	4	75.1781	3.90661	1.96592	0.00731395	0.0048057	up	yes	NC_010459.5:22215079..22258039:-
ssc_circ_0001193	11	215.374	2	37.589	5.7297	2.51846	0.00750151	0.00492343	up	yes	NC_010444.4:47486153..47489786:-
ssc_circ_0001343	20	391.589	42	789.37	0.496078	-1.01136	0.00759318	0.00498082	down	yes	NC_010444.4:8388248..8390219:+
ssc_circ_0000366	13	254.533	3	56.3836	4.51431	2.1745	0.0077254	0.00505345	up	yes	NC_010443.5:182340847..182341116:+
ssc_circ_0001572	13	254.533	3	56.3836	4.51431	2.1745	0.0077254	0.00505345	up	yes	NC_010445.4:121918073..121922801:+
ssc_circ_0006023	13	254.533	3	56.3836	4.51431	2.1745	0.0077254	0.00505345	up	yes	NC_010455.5:110657082..110789120:+
ssc_circ_0001559	8	156.635	23	432.274	0.362352	-1.46453	0.00818514	0.00534525	down	yes	NC_010445.4:11792080..11794655:+
ssc_circ_0008363	8	156.635	23	432.274	0.362352	-1.46453	0.00818514	0.00534525	down	yes	NC_010461.5:110332792..110346171:+
ssc_circ_0004766	32	626.542	15	281.918	2.22243	1.15214	0.00819327	0.00534759	up	yes	NC_010451.4:48152108..48168468:+
ssc_circ_0008266	23	450.327	46	864.548	0.520881	-0.940973	0.00850291	0.00554661	down	yes	NC_010460.4:42329914..42330668:-
ssc_circ_0000859	29	567.804	13	244.329	2.32393	1.21657	0.00858377	0.00559625	up	yes	NC_010443.5:87134227..87153004:+
ssc_circ_0004396	13	254.533	31	582.63	0.436868	-1.19473	0.00867935	0.0056117	down	yes	NC_010450.4:964857..992003:+
ssc_circ_0003757	26	509.065	11	206.74	2.46235	1.30004	0.00876631	0.0056117	up	yes	NC_010449.5:49756117..49761237:+
ssc_circ_0002543	7	137.056	21	394.685	0.347254	-1.52594	0.00919319	0.0056117	down	yes	NC_010447.5:14028718..14030705:+
ssc_circ_0000288	18	352.43	6	112.767	3.12529	1.64399	0.0093744	0.0056117	up	yes	NC_010443.5:163743155..163758473:-
ssc_circ_0000678	10	195.794	26	488.658	0.400678	-1.31948	0.00938803	0.0056117	down	yes	NC_010443.5:270874729..270897897:+
ssc_circ_0000368	7	137.056	0	18.7945	7.29234	3.86638	0.00953363	0.0056117	up	yes	NC_010443.5:182341721..182348499:+
ssc_circ_0002379	7	137.056	0	18.7945	7.29234	3.86638	0.00953363	0.0056117	up	yes	NC_010446.5:77614097..77618720:+
ssc_circ_0002756	7	137.056	0	18.7945	7.29234	3.86638	0.00953363	0.0056117	up	yes	NC_010447.5:68106936..68113748:+
ssc_circ_0002980	7	137.056	0	18.7945	7.29234	3.86638	0.00953363	0.0056117	up	yes	NC_010448.4:109149043..109171834:-
ssc_circ_0003001	7	137.056	0	18.7945	7.29234	3.86638	0.00953363	0.0056117	up	yes	NC_010448.4:119415912..119425363:+
ssc_circ_0003747	7	137.056	0	18.7945	7.29234	3.86638	0.00953363	0.0056117	up	yes	NC_010449.5:47969622..47971049:-
ssc_circ_0004504	7	137.056	0	18.7945	7.29234	3.86638	0.00953363	0.0056117	up	yes	NC_010451.4:118014576..118018949:-
ssc_circ_0004789	7	137.056	0	18.7945	7.29234	3.86638	0.00953363	0.0056117	up	yes	NC_010451.4:6387175..6388462:+
ssc_circ_0005224	7	137.056	0	18.7945	7.29234	3.86638	0.00953363	0.0056117	up	yes	NC_010452.4:63899363..63912175:+
ssc_circ_0005261	7	137.056	0	18.7945	7.29234	3.86638	0.00953363	0.0056117	up	yes	NC_010452.4:701826..705049:-
ssc_circ_0005487	7	137.056	0	18.7945	7.29234	3.86638	0.00953363	0.0056117	up	yes	NC_010453.5:71115695..71123774:+
ssc_circ_0005530	7	137.056	0	18.7945	7.29234	3.86638	0.00953363	0.0056117	up	yes	NC_010453.5:9132180..9170916:+
ssc_circ_0005618	7	137.056	0	18.7945	7.29234	3.86638	0.00953363	0.0056117	up	yes	NC_010454.4:18552929..18555766:+
ssc_circ_0006184	7	137.056	0	18.7945	7.29234	3.86638	0.00953363	0.0056117	up	yes	NC_010455.5:140731010..140750477:-
ssc_circ_0006451	7	137.056	0	18.7945	7.29234	3.86638	0.00953363	0.0056117	up	yes	NC_010455.5:30472205..30512528:-
ssc_circ_0006481	7	137.056	0	18.7945	7.29234	3.86638	0.00953363	0.0056117	up	yes	NC_010455.5:31450559..31473909:-
ssc_circ_0006829	7	137.056	0	18.7945	7.29234	3.86638	0.00953363	0.0056117	up	yes	NC_010456.5:128696025..128708899:-
ssc_circ_0007134	7	137.056	0	18.7945	7.29234	3.86638	0.00953363	0.0056117	up	yes	NC_010456.5:71615773..71625769:-
ssc_circ_0007320	7	137.056	0	18.7945	7.29234	3.86638	0.00953363	0.0056117	up	yes	NC_010457.5:111133970..111134905:-
ssc_circ_0007335	7	137.056	0	18.7945	7.29234	3.86638	0.00953363	0.0056117	up	yes	NC_010457.5:117631742..117635263:+
ssc_circ_0007354	7	137.056	0	18.7945	7.29234	3.86638	0.00953363	0.0056117	up	yes	NC_010457.5:121179850..121189165:-
ssc_circ_0007354	7	137.056	0	18.7945	7.29234	3.86638	0.00953363	0.0056117	up	yes	NC_010457.5:121179850..121189165:-
ssc_circ_0007837	7	137.056	0	18.7945	7.29234	3.86638	0.00953363	0.0056117	up	yes	NC_010458.4:50437615..50478728:-
ssc_circ_0007861	7	137.056	0	18.7945	7.29234	3.86638	0.00953363	0.0056117	up	yes	NC_010458.4:55397761..55403998:-
ssc_circ_0007884	7	137.056	0	18.7945	7.29234	3.86638	0.00953363	0.0056117	up	yes	NC_010458.4:71262565..71263268:-
ssc_circ_0008002	7	137.056	0	18.7945	7.29234	3.86638	0.00953363	0.0056117	up	yes	NC_010459.5:37852424..37854328:+
ssc_circ_0002747	6	117.477	19	357.096	0.328978	-1.60394	0.0101905	0.00599237	down	yes	NC_010447.5:67681766..67688990:-
ssc_circ_0008218	6	117.477	19	357.096	0.328978	-1.60394	0.0101905	0.00599237	down	yes	NC_010460.4:2633093..2661452:-
ssc_circ_0000136	21	411.168	8	150.356	2.73463	1.45134	0.0104198	0.00612104	up	yes	NC_010443.5:127746552..127748761:+
ssc_circ_0002441	21	411.168	8	150.356	2.73463	1.45134	0.0104198	0.00612104	up	yes	NC_010446.5:93744902..93747422:+
ssc_circ_0005249	24	469.906	10	187.945	2.50023	1.32206	0.0107388	0.00630217	up	yes	NC_010452.4:68671265..68688441:+
ssc_circ_0004585	9	176.215	24	451.068	0.390661	-1.35601	0.0108171	0.00633845	down	yes	NC_010451.4:127561944..127566841:+
ssc_circ_0001810	2	39.1589	11	206.74	0.189411	-2.4004	0.0108222	0.00633845	down	yes	NC_010445.4:4264224..4277544:-
ssc_circ_0002253	2	39.1589	11	206.74	0.189411	-2.4004	0.0108222	0.00633845	down	yes	NC_010446.5:34757953..34758471:+
ssc_circ_0007760	2	39.1589	11	206.74	0.189411	-2.4004	0.0108222	0.00633845	down	yes	NC_010458.4:34633974..34639666:-
ssc_circ_0001668	16	313.271	5	93.9726	3.33364	1.7371	0.0108724	0.00635835	up	yes	NC_010445.4:22810516..22822228:+
ssc_circ_0004281	16	313.271	5	93.9726	3.33364	1.7371	0.0108724	0.00635835	up	yes	NC_010450.4:54838915..54855096:-
ssc_circ_0007623	16	313.271	5	93.9726	3.33364	1.7371	0.0108724	0.00635835	up	yes	NC_010457.5:798470..825763:-
ssc_circ_0004619	5	97.8972	17	319.507	0.306401	-1.70651	0.0110809	0.00643147	down	yes	NC_010451.4:131873041..131880686:-
ssc_circ_0001278	4	78.3177	15	281.918	0.277803	-1.84786	0.0116977	0.00643147	down	yes	NC_010444.4:70827334..70836232:-
ssc_circ_0002000	4	78.3177	15	281.918	0.277803	-1.84786	0.0116977	0.00643147	down	yes	NC_010445.4:87297672..87299574:+
ssc_circ_0002113	4	78.3177	15	281.918	0.277803	-1.84786	0.0116977	0.00643147	down	yes	NC_010446.5:118062336..118077545:-
ssc_circ_0002485	4	78.3177	15	281.918	0.277803	-1.84786	0.0116977	0.00643147	down	yes	NC_010446.5:98669435..98676168:-
ssc_circ_0003711	4	78.3177	15	281.918	0.277803	-1.84786	0.0116977	0.00643147	down	yes	NC_010449.5:31665249..31669318:-
ssc_circ_0001296	3	58.7383	13	244.329	0.240407	-2.05645	0.0117615	0.00643147	down	yes	NC_010444.4:77377826..77378193:-
ssc_circ_0005911	3	58.7383	13	244.329	0.240407	-2.05645	0.0117615	0.00643147	down	yes	NC_010454.4:5471981..5473179:+
ssc_circ_0005980	31	606.962	15	281.918	2.15298	1.10633	0.0117753	0.00643147	up	yes	NC_010454.4:60376419..60376920:-
ssc_circ_0001792	11	215.374	27	507.452	0.424422	-1.23643	0.0118548	0.00643147	down	yes	NC_010445.4:41973352..41978180:-
ssc_circ_0000245	0	19.5794	7	131.562	0.148823	-3.74833	0.0119659	0.00643147	down	yes	NC_010443.5:15224464..15250781:-
ssc_circ_0000634	0	19.5794	7	131.562	0.148823	-3.74833	0.0119659	0.00643147	down	yes	NC_010443.5:263873074..263916275:+
ssc_circ_0001451	0	19.5794	7	131.562	0.148823	-3.74833	0.0119659	0.00643147	down	yes	NC_010445.4:103693347..103773127:-
ssc_circ_0002244	0	19.5794	7	131.562	0.148823	-3.74833	0.0119659	0.00643147	down	yes	NC_010446.5:33087513..33153512:-
ssc_circ_0002445	0	19.5794	7	131.562	0.148823	-3.74833	0.0119659	0.00643147	down	yes	NC_010446.5:94072013..94073490:+
ssc_circ_0003347	0	19.5794	7	131.562	0.148823	-3.74833	0.0119659	0.00643147	down	yes	NC_010448.4:52971038..52992912:+
ssc_circ_0004891	0	19.5794	7	131.562	0.148823	-3.74833	0.0119659	0.00643147	down	yes	NC_010451.4:92135892..92147867:-
ssc_circ_0005439	0	19.5794	7	131.562	0.148823	-3.74833	0.0119659	0.00643147	down	yes	NC_010453.5:562633..562934:-
ssc_circ_0005481	0	19.5794	7	131.562	0.148823	-3.74833	0.0119659	0.00643147	down	yes	NC_010453.5:70151355..70219859:+
ssc_circ_0005718	0	19.5794	7	131.562	0.148823	-3.74833	0.0119659	0.00643147	down	yes	NC_010454.4:35882708..35884162:+
ssc_circ_0006022	0	19.5794	7	131.562	0.148823	-3.74833	0.0119659	0.00643147	down	yes	NC_010455.5:110657082..110681603:+
ssc_circ_0006202	0	19.5794	7	131.562	0.148823	-3.74833	0.0119659	0.00643147	down	yes	NC_010455.5:147817756..147839301:-
ssc_circ_0006268	0	19.5794	7	131.562	0.148823	-3.74833	0.0119659	0.00643147	down	yes	NC_010455.5:179259003..179289928:+
ssc_circ_0006446	0	19.5794	7	131.562	0.148823	-3.74833	0.0119659	0.00643147	down	yes	NC_010455.5:30110846..30113591:+
ssc_circ_0006835	0	19.5794	7	131.562	0.148823	-3.74833	0.0119659	0.00643147	down	yes	NC_010456.5:128986998..128988536:-
ssc_circ_0005623	14	274.112	4	75.1781	3.64617	1.86638	0.0123198	0.00661868	up	yes	NC_010454.4:20118352..20123255:+
ssc_circ_0005528	8	156.635	22	413.479	0.378823	-1.4004	0.0123986	0.00664884	down	yes	NC_010453.5:8974451..8982801:-
ssc_circ_0005723	8	156.635	22	413.479	0.378823	-1.4004	0.0123986	0.00664884	down	yes	NC_010454.4:35952997..35960199:+
ssc_circ_0006155	8	156.635	22	413.479	0.378823	-1.4004	0.0123986	0.00664884	down	yes	NC_010455.5:134998506..135020313:+
ssc_circ_0002448	57	1116.03	35	657.808	1.69659	0.762634	0.0124387	0.00666733	up	yes	NC_010446.5:94216682..94220967:+
ssc_circ_0000985	28	548.224	13	244.329	2.2438	1.16594	0.0125311	0.00670654	up	yes	NC_010444.4:133976286..133983650:-
ssc_circ_0000157	19	372.009	7	131.562	2.82764	1.4996	0.0125404	0.00670654	up	yes	NC_010443.5:130233523..130242062:+
ssc_circ_0006919	19	372.009	7	131.562	2.82764	1.4996	0.0125404	0.00670654	up	yes	NC_010456.5:20270674..20282065:+
ssc_circ_0003487	17	332.85	36	676.603	0.491944	-1.02344	0.0125679	0.00671817	down	yes	NC_010448.4:88644098..88646110:+
ssc_circ_0004885	24	469.906	46	864.548	0.543528	-0.879572	0.0129173	0.00690183	down	yes	NC_010451.4:9103677..9149572:+
ssc_circ_0004360	22	430.748	9	169.151	2.54653	1.34853	0.0131401	0.00701451	up	yes	NC_010450.4:82957079..82957656:-
ssc_circ_0001413	58	1135.61	36	676.603	1.6784	0.747083	0.0132658	0.00707835	up	yes	NC_010444.4:95657661..95677798:-
ssc_circ_0007972	12	234.953	3	56.3836	4.16705	2.05903	0.013421	0.00715792	up	yes	NC_010459.5:31807232..31817495:-
ssc_circ_0008292	33	646.121	58	1090.08	0.592727	-0.75456	0.0143863	0.00766929	down	yes	NC_010460.4:51340815..51349397:-
ssc_circ_0000516	17	332.85	6	112.767	2.95166	1.56153	0.0149846	0.00798101	up	yes	NC_010443.5:228980934..229026540:+
ssc_circ_0003428	17	332.85	6	112.767	2.95166	1.56153	0.0149846	0.00798101	up	yes	NC_010448.4:74829110..74832543:+
ssc_circ_0005195	23	450.327	44	826.959	0.544558	-0.876843	0.0153099	0.00814689	down	yes	NC_010452.4:5761746..5772004:+
ssc_circ_0004725	33	646.121	17	319.507	2.02225	1.01596	0.0153415	0.00816	up	yes	NC_010451.4:37048731..37055819:+
ssc_circ_0002615	6	117.477	18	338.301	0.347254	-1.52594	0.0158861	0.0084382	down	yes	NC_010447.5:28843589..28844046:+
ssc_circ_0003038	6	117.477	18	338.301	0.347254	-1.52594	0.0158861	0.0084382	down	yes	NC_010448.4:135651327..135659362:+
ssc_circ_0005925	6	117.477	18	338.301	0.347254	-1.52594	0.0158861	0.0084382	down	yes	NC_010454.4:57219146..57220106:-
ssc_circ_0008553	46	900.654	27	507.452	1.77486	0.827701	0.0159793	0.00848387	up	yes	NW_018084833.1:272348..278294:-
ssc_circ_0002055	20	391.589	8	150.356	2.60441	1.38096	0.0160495	0.00851732	up	yes	NC_010446.5:101135602..101139235:+
ssc_circ_0008251	9	176.215	23	432.274	0.407646	-1.29461	0.0160668	0.00852263	down	yes	NC_010460.4:40175333..40184681:-
ssc_circ_0002128	21	411.168	41	770.575	0.533586	-0.906208	0.0160889	0.00852763	down	yes	NC_010446.5:123121212..123125471:+
ssc_circ_0000061	23	450.327	10	187.945	2.39605	1.26066	0.0160907	0.00852763	up	yes	NC_010443.5:112996635..113013582:-
ssc_circ_0005502	80	1566.35	55	1033.7	1.51529	0.599595	0.0166083	0.00879796	up	yes	NC_010453.5:77475172..77489240:+
ssc_circ_0008468	42	822.336	24	451.068	1.82309	0.866382	0.0166811	0.00883258	up	yes	NC_010461.5:61688015..61691522:-
ssc_circ_0000164	19	372.009	38	714.192	0.520881	-0.940973	0.0167774	0.00887888	down	yes	NC_010443.5:130268080..130275035:+
ssc_circ_0004167	30	587.383	15	281.918	2.08353	1.05903	0.0167837	0.00887888	up	yes	NC_010450.4:16716774..16755944:-
ssc_circ_0002929	34	665.701	18	338.301	1.96777	0.976565	0.017243	0.0090241	up	yes	NC_010448.4:1051422..1053024:-
ssc_circ_0003885	34	665.701	18	338.301	1.96777	0.976565	0.017243	0.0090241	up	yes	NC_010449.5:68160992..68169856:+
ssc_circ_0004598	5	97.8972	16	300.712	0.325551	-1.61904	0.0176112	0.0090241	down	yes	NC_010451.4:130297504..130384896:-
ssc_circ_0004802	27	528.645	49	920.931	0.574033	-0.800795	0.0178747	0.0090241	down	yes	NC_010451.4:66405629..66409132:-
ssc_circ_0006674	27	528.645	49	920.931	0.574033	-0.800795	0.0178747	0.0090241	down	yes	NC_010455.5:82256891..82274534:+
ssc_circ_0008234	27	528.645	13	244.329	2.16366	1.11347	0.0181337	0.0090241	up	yes	NC_010460.4:38110775..38132080:-
ssc_circ_0000237	8	156.635	21	394.685	0.396862	-1.33329	0.0186118	0.0090241	down	yes	NC_010443.5:14813380..14817648:+
ssc_circ_0000261	8	156.635	21	394.685	0.396862	-1.33329	0.0186118	0.0090241	down	yes	NC_010443.5:161909790..161924707:-
ssc_circ_0000494	6	117.477	0	18.7945	6.25058	3.64399	0.0187318	0.0090241	up	yes	NC_010443.5:219770042..219776847:-
ssc_circ_0000765	6	117.477	0	18.7945	6.25058	3.64399	0.0187318	0.0090241	up	yes	NC_010443.5:66353976..66360969:-
ssc_circ_0001219	6	117.477	0	18.7945	6.25058	3.64399	0.0187318	0.0090241	up	yes	NC_010444.4:58270838..58271233:+
ssc_circ_0002106	6	117.477	0	18.7945	6.25058	3.64399	0.0187318	0.0090241	up	yes	NC_010446.5:117916365..117917394:+
ssc_circ_0002705	6	117.477	0	18.7945	6.25058	3.64399	0.0187318	0.0090241	up	yes	NC_010447.5:51580117..51594787:+
ssc_circ_0002954	6	117.477	0	18.7945	6.25058	3.64399	0.0187318	0.0090241	up	yes	NC_010448.4:106936502..106994788:+
ssc_circ_0002985	6	117.477	0	18.7945	6.25058	3.64399	0.0187318	0.0090241	up	yes	NC_010448.4:110753545..110758296:-
ssc_circ_0004417	6	117.477	0	18.7945	6.25058	3.64399	0.0187318	0.0090241	up	yes	NC_010451.4:102492067..102493049:-
ssc_circ_0004949	6	117.477	0	18.7945	6.25058	3.64399	0.0187318	0.0090241	up	yes	NC_010452.4:14217434..14218735:-
ssc_circ_0005340	6	117.477	0	18.7945	6.25058	3.64399	0.0187318	0.0090241	up	yes	NC_010453.5:22116588..22128793:-
ssc_circ_0005678	6	117.477	0	18.7945	6.25058	3.64399	0.0187318	0.0090241	up	yes	NC_010454.4:27249779..27250993:-
ssc_circ_0005757	6	117.477	0	18.7945	6.25058	3.64399	0.0187318	0.0090241	up	yes	NC_010454.4:378682..422053:-
ssc_circ_0006108	6	117.477	0	18.7945	6.25058	3.64399	0.0187318	0.0090241	up	yes	NC_010455.5:132304897..132326005:-
ssc_circ_0006266	6	117.477	0	18.7945	6.25058	3.64399	0.0187318	0.0090241	up	yes	NC_010455.5:17582876..17602712:+
ssc_circ_0006457	6	117.477	0	18.7945	6.25058	3.64399	0.0187318	0.0090241	up	yes	NC_010455.5:30500711..30547685:-
ssc_circ_0007909	6	117.477	0	18.7945	6.25058	3.64399	0.0187318	0.0090241	up	yes	NC_010459.5:1179581..1182709:-
ssc_circ_0007999	6	117.477	0	18.7945	6.25058	3.64399	0.0187318	0.0090241	up	yes	NC_010459.5:37831734..37854328:+
ssc_circ_0008025	6	117.477	0	18.7945	6.25058	3.64399	0.0187318	0.0090241	up	yes	NC_010459.5:39143283..39144798:+
ssc_circ_0008490	2	39.1589	10	187.945	0.208353	-2.2629	0.0189845	0.0091346	down	yes	NC_010461.5:6859159..6871558:+
ssc_circ_0008522	2	39.1589	10	187.945	0.208353	-2.2629	0.0189845	0.0091346	down	yes	NC_010461.5:88089031..88099421:+
ssc_circ_0001179	20	391.589	39	732.986	0.534237	-0.904447	0.0190999	0.00918636	down	yes	NC_010444.4:44943647..44945046:+
ssc_circ_0001273	18	352.43	7	131.562	2.67882	1.4216	0.0195477	0.00939405	up	yes	NC_010444.4:69853256..69853745:+
ssc_circ_0003034	18	352.43	7	131.562	2.67882	1.4216	0.0195477	0.00939405	up	yes	NC_010448.4:135569387..135570057:+
ssc_circ_0006409	3	58.7383	12	225.534	0.260441	-1.94097	0.0197721	0.00949028	down	yes	NC_010455.5:26086741..26109530:-
ssc_circ_0006884	3	58.7383	12	225.534	0.260441	-1.94097	0.0197721	0.00949028	down	yes	NC_010456.5:136294615..136313398:+
ssc_circ_0005768	13	254.533	4	75.1781	3.38573	1.75947	0.0205497	0.00985146	up	yes	NC_010454.4:38711800..38716290:-
ssc_circ_0006689	13	254.533	4	75.1781	3.38573	1.75947	0.0205497	0.00985146	up	yes	NC_010455.5:83159181..83160799:-
ssc_circ_0007447	13	254.533	4	75.1781	3.38573	1.75947	0.0205497	0.00985146	up	yes	NC_010457.5:25140315..25143159:+
ssc_circ_0005808	28	548.224	14	263.123	2.08353	1.05903	0.020872	0.00999371	up	yes	NC_010454.4:42589975..42596350:-
ssc_circ_0006887	28	548.224	14	263.123	2.08353	1.05903	0.020872	0.00999371	up	yes	NC_010456.5:136307328..136335070:+
ssc_circ_0001126	14	274.112	30	563.836	0.486156	-1.04051	0.0209214	0.0100133	down	yes	NC_010444.4:27649122..27650223:-
ssc_circ_0001640	7	137.056	19	357.096	0.383807	-1.38155	0.0214469	0.0100556	down	yes	NC_010445.4:16852714..16853935:-
ssc_circ_0005712	7	137.056	19	357.096	0.383807	-1.38155	0.0214469	0.0100556	down	yes	NC_010454.4:35369433..35372768:-
ssc_circ_0007807	7	137.056	19	357.096	0.383807	-1.38155	0.0214469	0.0100556	down	yes	NC_010458.4:44513270..44517349:+
ssc_circ_0000298	0	19.5794	6	112.767	0.173627	-3.52594	0.0229259	0.0100556	down	yes	NC_010443.5:164420445..164422619:+
ssc_circ_0000594	0	19.5794	6	112.767	0.173627	-3.52594	0.0229259	0.0100556	down	yes	NC_010443.5:251528156..251531745:-
ssc_circ_0001527	0	19.5794	6	112.767	0.173627	-3.52594	0.0229259	0.0100556	down	yes	NC_010445.4:113127816..113148454:+
ssc_circ_0001594	0	19.5794	6	112.767	0.173627	-3.52594	0.0229259	0.0100556	down	yes	NC_010445.4:126564667..126580084:-
ssc_circ_0001646	0	19.5794	6	112.767	0.173627	-3.52594	0.0229259	0.0100556	down	yes	NC_010445.4:16964040..16964840:-
ssc_circ_0001760	0	19.5794	6	112.767	0.173627	-3.52594	0.0229259	0.0100556	down	yes	NC_010445.4:39153031..39163533:-
ssc_circ_0001857	0	19.5794	6	112.767	0.173627	-3.52594	0.0229259	0.0100556	down	yes	NC_010445.4:4974527..4985274:+
ssc_circ_0002281	0	19.5794	6	112.767	0.173627	-3.52594	0.0229259	0.0100556	down	yes	NC_010446.5:39934333..39947459:-
ssc_circ_0002369	0	19.5794	6	112.767	0.173627	-3.52594	0.0229259	0.0100556	down	yes	NC_010446.5:72049008..72065043:+
ssc_circ_0003260	0	19.5794	6	112.767	0.173627	-3.52594	0.0229259	0.0100556	down	yes	NC_010448.4:34743079..34751712:-
ssc_circ_0003550	0	19.5794	6	112.767	0.173627	-3.52594	0.0229259	0.0100556	down	yes	NC_010448.4:98742427..98761176:-
ssc_circ_0003700	0	19.5794	6	112.767	0.173627	-3.52594	0.0229259	0.0100556	down	yes	NC_010449.5:306094..311618:-
ssc_circ_0004339	0	19.5794	6	112.767	0.173627	-3.52594	0.0229259	0.0100556	down	yes	NC_010450.4:76195576..76222810:-
ssc_circ_0004517	0	19.5794	6	112.767	0.173627	-3.52594	0.0229259	0.0100556	down	yes	NC_010451.4:119541..121030:-
ssc_circ_0005597	0	19.5794	6	112.767	0.173627	-3.52594	0.0229259	0.0100556	down	yes	NC_010454.4:16158876..16174077:-
ssc_circ_0005720	0	19.5794	6	112.767	0.173627	-3.52594	0.0229259	0.0100556	down	yes	NC_010454.4:3589853..3599602:-
ssc_circ_0005750	0	19.5794	6	112.767	0.173627	-3.52594	0.0229259	0.0100556	down	yes	NC_010454.4:37509450..37517080:-
ssc_circ_0006025	0	19.5794	6	112.767	0.173627	-3.52594	0.0229259	0.0100556	down	yes	NC_010455.5:110784615..110789120:+
ssc_circ_0008237	0	19.5794	6	112.767	0.173627	-3.52594	0.0229259	0.0100556	down	yes	NC_010460.4:38819025..38843265:+
ssc_circ_0008404	0	19.5794	6	112.767	0.173627	-3.52594	0.0229259	0.0100556	down	yes	NC_010461.5:19987739..19995816:-
ssc_circ_0000305	11	215.374	3	56.3836	3.8198	1.9335	0.0231044	0.0101112	up	yes	NC_010443.5:1657903..1663793:-
ssc_circ_0000448	11	215.374	3	56.3836	3.8198	1.9335	0.0231044	0.0101112	up	yes	NC_010443.5:205515399..205557988:-
ssc_circ_0002372	11	215.374	3	56.3836	3.8198	1.9335	0.0231044	0.0101112	up	yes	NC_010446.5:72630918..72643259:-
ssc_circ_0003331	11	215.374	3	56.3836	3.8198	1.9335	0.0231044	0.0101112	up	yes	NC_010448.4:47692761..47693775:-
ssc_circ_0005181	11	215.374	3	56.3836	3.8198	1.9335	0.0231044	0.0101112	up	yes	NC_010452.4:56466524..56478719:+
ssc_circ_0006375	11	215.374	3	56.3836	3.8198	1.9335	0.0231044	0.0101112	up	yes	NC_010455.5:206959483..206970402:+
ssc_circ_0001497	9	176.215	22	413.479	0.426176	-1.23048	0.0236451	0.0103325	down	yes	NC_010445.4:107609926..107644742:+
ssc_circ_0003479	9	176.215	22	413.479	0.426176	-1.23048	0.0236451	0.0103325	down	yes	NC_010448.4:87628833..87630082:-
ssc_circ_0004126	9	176.215	22	413.479	0.426176	-1.23048	0.0236451	0.0103325	down	yes	NC_010450.4:133695707..133705563:+
ssc_circ_0008557	9	176.215	22	413.479	0.426176	-1.23048	0.0236451	0.0103325	down	yes	NW_018084833.1:304068..318832:-
ssc_circ_0007258	16	313.271	6	112.767	2.77803	1.47406	0.0237011	0.0103531	up	yes	NC_010457.5:100960873..100971421:-
ssc_circ_0003242	9	176.215	2	37.589	4.68793	2.22895	0.0244128	0.0106481	up	yes	NC_010448.4:30531892..30533990:+
ssc_circ_0005489	9	176.215	2	37.589	4.68793	2.22895	0.0244128	0.0106481	up	yes	NC_010453.5:71125629..71135931:+
ssc_circ_0005758	9	176.215	2	37.589	4.68793	2.22895	0.0244128	0.0106481	up	yes	NC_010454.4:37921571..37928284:+
ssc_circ_0007075	9	176.215	2	37.589	4.68793	2.22895	0.0244128	0.0106481	up	yes	NC_010456.5:57430091..57430873:-
ssc_circ_0002727	19	372.009	8	150.356	2.47419	1.30695	0.0244667	0.0106677	up	yes	NC_010447.5:6010064..6014815:+
ssc_circ_0000080	6	117.477	17	319.507	0.367681	-1.44347	0.0245233	0.0106805	down	yes	NC_010443.5:11656690..11658867:-
ssc_circ_0004515	6	117.477	17	319.507	0.367681	-1.44347	0.0245233	0.0106805	down	yes	NC_010451.4:118068519..118074614:-
ssc_circ_0007241	6	117.477	17	319.507	0.367681	-1.44347	0.0245233	0.0106805	down	yes	NC_010456.5:92396506..92409653:+
ssc_circ_0007589	11	215.374	25	469.863	0.458376	-1.1254	0.0246529	0.0107329	down	yes	NC_010457.5:75966720..75970294:+
ssc_circ_0001218	13	254.533	28	526.247	0.483676	-1.04789	0.0248315	0.0108067	down	yes	NC_010444.4:5782769..5784337:-
ssc_circ_0006188	26	509.065	13	244.329	2.08353	1.05903	0.0259992	0.0113065	up	yes	NC_010455.5:140805618..140817139:+
ssc_circ_0000032	23	450.327	42	789.37	0.570489	-0.809728	0.0268669	0.0116795	down	yes	NC_010443.5:107763496..107763896:+
ssc_circ_0004093	16	313.271	32	601.425	0.520881	-0.940973	0.0281961	0.0122528	down	yes	NC_010450.4:125092162..125121806:-
ssc_circ_0000874	14	274.112	5	93.9726	2.91694	1.54445	0.0285257	0.0123777	up	yes	NC_010443.5:90816717..90819974:+
ssc_circ_0004708	14	274.112	5	93.9726	2.91694	1.54445	0.0285257	0.0123777	up	yes	NC_010451.4:36495729..36497094:+
ssc_circ_0005083	14	274.112	5	93.9726	2.91694	1.54445	0.0285257	0.0123777	up	yes	NC_010452.4:42063542..42079536:+
ssc_circ_0006077	14	274.112	5	93.9726	2.91694	1.54445	0.0285257	0.0123777	up	yes	NC_010455.5:123437550..123438399:+
ssc_circ_0004753	10	195.794	23	432.274	0.45294	-1.14261	0.0291492	0.0126436	down	yes	NC_010451.4:44717823..44718203:+
ssc_circ_0007250	20	391.589	9	169.151	2.31503	1.21103	0.029658	0.0128596	up	yes	NC_010456.5:9497312..9505715:-
ssc_circ_0006225	17	332.85	7	131.562	2.53	1.33913	0.0301385	0.0130631	up	yes	NC_010455.5:157715016..157731436:+
ssc_circ_0002263	4	78.3177	13	244.329	0.320542	-1.64141	0.0307146	0.0132932	down	yes	NC_010446.5:37699840..37768200:-
ssc_circ_0005982	4	78.3177	13	244.329	0.320542	-1.64141	0.0307146	0.0132932	down	yes	NC_010454.4:6073486..6074110:-
ssc_circ_0000355	7	137.056	18	338.301	0.40513	-1.30354	0.0322724	0.013952	down	yes	NC_010443.5:180529105..180552016:-
ssc_circ_0000524	7	137.056	18	338.301	0.40513	-1.30354	0.0322724	0.013952	down	yes	NC_010443.5:229603970..229612467:-
ssc_circ_0002593	24	469.906	12	225.534	2.08353	1.05903	0.0324472	0.0140173	up	yes	NC_010447.5:2619764..2692132:-
ssc_circ_0005551	24	469.906	12	225.534	2.08353	1.05903	0.0324472	0.0140173	up	yes	NC_010454.4:14038571..14040563:+
ssc_circ_0001735	31	606.962	52	977.315	0.621051	-0.687216	0.0327369	0.0141372	down	yes	NC_010445.4:31358570..31359294:+
ssc_circ_0001083	3	58.7383	11	206.74	0.284117	-1.81544	0.0329248	0.0141975	down	yes	NC_010444.4:151697214..151701741:-
ssc_circ_0003132	3	58.7383	11	206.74	0.284117	-1.81544	0.0329248	0.0141975	down	yes	NC_010448.4:160699489..160720786:+
ssc_circ_0003378	3	58.7383	11	206.74	0.284117	-1.81544	0.0329248	0.0141975	down	yes	NC_010448.4:63879633..63893464:-
ssc_circ_0005790	3	58.7383	11	206.74	0.284117	-1.81544	0.0329248	0.0141975	down	yes	NC_010454.4:39986359..39987422:+
ssc_circ_0001634	2	39.1589	9	169.151	0.231503	-2.1109	0.0330586	0.0142083	down	yes	NC_010445.4:16847447..16853935:-
ssc_circ_0005296	2	39.1589	9	169.151	0.231503	-2.1109	0.0330586	0.0142083	down	yes	NC_010453.5:1335980..1355348:-
ssc_circ_0005336	2	39.1589	9	169.151	0.231503	-2.1109	0.0330586	0.0142083	down	yes	NC_010453.5:21804834..21808388:-
ssc_circ_0006284	2	39.1589	9	169.151	0.231503	-2.1109	0.0330586	0.0142083	down	yes	NC_010455.5:189317682..189318261:+
ssc_circ_0007022	2	39.1589	9	169.151	0.231503	-2.1109	0.0330586	0.0142083	down	yes	NC_010456.5:45227613..45230916:-
ssc_circ_0007496	2	39.1589	9	169.151	0.231503	-2.1109	0.0330586	0.0142083	down	yes	NC_010457.5:48192255..48192770:+
ssc_circ_0001035	28	548.224	15	281.918	1.94462	0.959491	0.033206	0.014256	up	yes	NC_010444.4:141219340..141223721:+
ssc_circ_0002393	28	548.224	15	281.918	1.94462	0.959491	0.033206	0.014256	up	yes	NC_010446.5:80973985..80978012:+
ssc_circ_0006011	28	548.224	15	281.918	1.94462	0.959491	0.033206	0.014256	up	yes	NC_010455.5:108816286..108829633:-
ssc_circ_0002693	12	234.953	4	75.1781	3.12529	1.64399	0.0338998	0.0144514	up	yes	NC_010447.5:48889600..48911418:+
ssc_circ_0003384	12	234.953	4	75.1781	3.12529	1.64399	0.0338998	0.0144514	up	yes	NC_010448.4:69071403..69080408:-
ssc_circ_0006535	9	176.215	21	394.685	0.44647	-1.16337	0.0344572	0.0144514	down	yes	NC_010455.5:38541875..38545830:-
ssc_circ_0008163	9	176.215	21	394.685	0.44647	-1.16337	0.0344572	0.0144514	down	yes	NC_010460.4:1611977..1619339:-
ssc_circ_0004145	38	744.018	23	432.274	1.72117	0.783393	0.0367519	0.0144514	up	yes	NC_010450.4:135780981..135786172:-
ssc_circ_0000814	18	352.43	8	150.356	2.34397	1.22895	0.0368842	0.0144514	up	yes	NC_010443.5:77215898..77241817:-
ssc_circ_0002385	18	352.43	8	150.356	2.34397	1.22895	0.0368842	0.0144514	up	yes	NC_010446.5:79822366..79825948:+
ssc_circ_0006410	25	489.486	13	244.329	2.00339	1.00244	0.0369145	0.0144514	up	yes	NC_010455.5:26160701..26169083:+
ssc_circ_0002517	15	293.692	6	112.767	2.60441	1.38096	0.0370564	0.0144514	up	yes	NC_010447.5:103157325..103170388:-
ssc_circ_0003171	15	293.692	6	112.767	2.60441	1.38096	0.0370564	0.0144514	up	yes	NC_010448.4:169018075..169073044:+
ssc_circ_0004942	15	293.692	6	112.767	2.60441	1.38096	0.0370564	0.0144514	up	yes	NC_010452.4:13491755..13584348:-
ssc_circ_0000432	5	97.8972	0	18.7945	5.20881	3.38096	0.0371649	0.0144514	up	yes	NC_010443.5:202536297..202536998:+
ssc_circ_0000904	5	97.8972	0	18.7945	5.20881	3.38096	0.0371649	0.0144514	up	yes	NC_010443.5:98354267..98358280:+
ssc_circ_0001797	5	97.8972	0	18.7945	5.20881	3.38096	0.0371649	0.0144514	up	yes	NC_010445.4:41997364..42001550:-
ssc_circ_0001818	5	97.8972	0	18.7945	5.20881	3.38096	0.0371649	0.0144514	up	yes	NC_010445.4:42881922..42902838:+
ssc_circ_0001897	5	97.8972	0	18.7945	5.20881	3.38096	0.0371649	0.0144514	up	yes	NC_010445.4:60162503..60174324:+
ssc_circ_0004294	5	97.8972	0	18.7945	5.20881	3.38096	0.0371649	0.0144514	up	yes	NC_010450.4:55733734..55755369:+
ssc_circ_0004333	5	97.8972	0	18.7945	5.20881	3.38096	0.0371649	0.0144514	up	yes	NC_010450.4:74626204..74627248:+
ssc_circ_0006700	5	97.8972	0	18.7945	5.20881	3.38096	0.0371649	0.0144514	up	yes	NC_010455.5:86452535..86459135:-
ssc_circ_0006844	5	97.8972	0	18.7945	5.20881	3.38096	0.0371649	0.0144514	up	yes	NC_010456.5:129769785..129775865:+
ssc_circ_0006879	5	97.8972	0	18.7945	5.20881	3.38096	0.0371649	0.0144514	up	yes	NC_010456.5:136258011..136271400:+
ssc_circ_0007011	5	97.8972	0	18.7945	5.20881	3.38096	0.0371649	0.0144514	up	yes	NC_010456.5:40966694..40972298:-
ssc_circ_0007173	5	97.8972	0	18.7945	5.20881	3.38096	0.0371649	0.0144514	up	yes	NC_010456.5:7473479..7483479:-
ssc_circ_0007912	5	97.8972	0	18.7945	5.20881	3.38096	0.0371649	0.0144514	up	yes	NC_010459.5:11844341..11850285:+
ssc_circ_0008431	5	97.8972	0	18.7945	5.20881	3.38096	0.0371649	0.0144514	up	yes	NC_010461.5:46314295..46315147:-
ssc_circ_0008551	5	97.8972	0	18.7945	5.20881	3.38096	0.0371649	0.0144514	up	yes	NW_018084833.1:262604..267811:-
ssc_circ_0008578	5	97.8972	0	18.7945	5.20881	3.38096	0.0371649	0.0144514	up	yes	NW_018084979.1:1574289..1601363:+
ssc_circ_0008616	5	97.8972	0	18.7945	5.20881	3.38096	0.0371649	0.0144514	up	yes	NW_018085108.1:49009..49336:+
ssc_circ_0000327	6	117.477	16	300.712	0.390661	-1.35601	0.0374534	0.0145588	down	yes	NC_010443.5:169678853..169685830:+
ssc_circ_0007530	30	587.383	50	939.726	0.625058	-0.677939	0.0385595	0.0149838	down	yes	NC_010457.5:59562524..59570339:+
ssc_circ_0005046	34	665.701	20	375.89	1.771	0.824562	0.0389703	0.0151384	up	yes	NC_010452.4:32817449..32827084:+
ssc_circ_0000119	10	195.794	3	56.3836	3.47254	1.79599	0.0393549	0.0152676	up	yes	NC_010443.5:122494128..122514658:-
ssc_circ_0006808	10	195.794	3	56.3836	3.47254	1.79599	0.0393549	0.0152676	up	yes	NC_010456.5:120993720..120996812:+
ssc_circ_0007068	10	195.794	3	56.3836	3.47254	1.79599	0.0393549	0.0152676	up	yes	NC_010456.5:56054324..56068594:+
ssc_circ_0005012	37	724.439	59	1108.88	0.653309	-0.614163	0.039521	0.0153253	down	yes	NC_010452.4:25205440..25206443:+
ssc_circ_0004356	8	156.635	19	357.096	0.438637	-1.1889	0.0407063	0.0157659	down	yes	NC_010450.4:82698451..82719341:+
ssc_circ_0005889	8	156.635	19	357.096	0.438637	-1.1889	0.0407063	0.0157659	down	yes	NC_010454.4:51636713..51642686:-
ssc_circ_0003307	57	1116.03	39	732.986	1.52258	0.606515	0.0411175	0.0159199	up	yes	NC_010448.4:43867657..43870512:+
ssc_circ_0006857	12	234.953	25	469.863	0.500046	-0.999867	0.0413408	0.0159464	down	yes	NC_010456.5:131560094..131576631:-
ssc_circ_0008090	12	234.953	25	469.863	0.500046	-0.999867	0.0413408	0.0159464	down	yes	NC_010459.5:58635283..58643708:+
ssc_circ_0003404	5	97.8972	14	263.123	0.372058	-1.4264	0.0431161	0.0159464	down	yes	NC_010448.4:70578482..70586855:+
ssc_circ_0006633	5	97.8972	14	263.123	0.372058	-1.4264	0.0431161	0.0159464	down	yes	NC_010455.5:73093379..73094623:-
ssc_circ_0001210	46	900.654	30	563.836	1.59737	0.675698	0.0434404	0.0159464	up	yes	NC_010444.4:50831116..50831660:+
ssc_circ_0003344	8	156.635	2	37.589	4.16705	2.05903	0.0435219	0.0159464	up	yes	NC_010448.4:52754997..52758867:+
ssc_circ_0004543	8	156.635	2	37.589	4.16705	2.05903	0.0435219	0.0159464	up	yes	NC_010451.4:121616521..121622956:+
ssc_circ_0007328	8	156.635	2	37.589	4.16705	2.05903	0.0435219	0.0159464	up	yes	NC_010457.5:112869863..112896614:-
ssc_circ_0000756	19	372.009	9	169.151	2.19928	1.13703	0.0438288	0.0159464	up	yes	NC_010443.5:593018..598149:+
ssc_circ_0007568	19	372.009	9	169.151	2.19928	1.13703	0.0438288	0.0159464	up	yes	NC_010457.5:68182402..68194828:+
ssc_circ_0000377	0	19.5794	5	93.9726	0.208353	-3.2629	0.0443062	0.0159464	down	yes	NC_010443.5:182688834..182720865:-
ssc_circ_0000698	0	19.5794	5	93.9726	0.208353	-3.2629	0.0443062	0.0159464	down	yes	NC_010443.5:29027848..29042644:+
ssc_circ_0002999	0	19.5794	5	93.9726	0.208353	-3.2629	0.0443062	0.0159464	down	yes	NC_010448.4:119398688..119425363:+
ssc_circ_0003411	0	19.5794	5	93.9726	0.208353	-3.2629	0.0443062	0.0159464	down	yes	NC_010448.4:71295602..71299202:-
ssc_circ_0003795	0	19.5794	5	93.9726	0.208353	-3.2629	0.0443062	0.0159464	down	yes	NC_010449.5:56259271..56261229:-
ssc_circ_0003853	0	19.5794	5	93.9726	0.208353	-3.2629	0.0443062	0.0159464	down	yes	NC_010449.5:64302845..64327181:+
ssc_circ_0003962	0	19.5794	5	93.9726	0.208353	-3.2629	0.0443062	0.0159464	down	yes	NC_010449.5:88553632..88564078:-
ssc_circ_0004188	0	19.5794	5	93.9726	0.208353	-3.2629	0.0443062	0.0159464	down	yes	NC_010450.4:20285480..20362374:+
ssc_circ_0004835	0	19.5794	5	93.9726	0.208353	-3.2629	0.0443062	0.0159464	down	yes	NC_010451.4:73718..77619:-
ssc_circ_0005028	0	19.5794	5	93.9726	0.208353	-3.2629	0.0443062	0.0159464	down	yes	NC_010452.4:29137698..29140685:+
ssc_circ_0005814	0	19.5794	5	93.9726	0.208353	-3.2629	0.0443062	0.0159464	down	yes	NC_010454.4:42949250..42949457:+
ssc_circ_0006854	0	19.5794	5	93.9726	0.208353	-3.2629	0.0443062	0.0159464	down	yes	NC_010456.5:131495285..131576631:-
ssc_circ_0006967	0	19.5794	5	93.9726	0.208353	-3.2629	0.0443062	0.0159464	down	yes	NC_010456.5:30426235..30453912:+
ssc_circ_0007547	0	19.5794	5	93.9726	0.208353	-3.2629	0.0443062	0.0159464	down	yes	NC_010457.5:64759481..64777189:-
ssc_circ_0008389	0	19.5794	5	93.9726	0.208353	-3.2629	0.0443062	0.0159464	down	yes	NC_010461.5:13266919..13270698:+
ssc_circ_0006111	27	528.645	15	281.918	1.87517	0.907024	0.0460532	0.0165549	up	yes	NC_010455.5:132321056..132337788:-
ssc_circ_0008581	27	528.645	15	281.918	1.87517	0.907024	0.0460532	0.0165549	up	yes	NW_018084979.1:1677528..1679425:-
ssc_circ_0002022	13	254.533	26	488.658	0.520881	-0.940973	0.0479223	0.0172163	down	yes	NC_010445.4:92779851..92782233:+
ssc_circ_0002038	7	137.056	17	319.507	0.428961	-1.22108	0.0480283	0.0172385	down	yes	NC_010445.4:96116880..96124120:+
ssc_circ_0006119	7	137.056	17	319.507	0.428961	-1.22108	0.0480283	0.0172385	down	yes	NC_010455.5:132986164..132991254:+
ssc_circ_0008330	7	137.056	17	319.507	0.428961	-1.22108	0.0480283	0.0172385	down	yes	NC_010460.4:612442..618436:+
ssc_circ_0002329	4	78.3177	12	225.534	0.347254	-1.52594	0.0489606	0.0175517	down	yes	NC_010446.5:56162673..56163561:-
ssc_circ_0006833	4	78.3177	12	225.534	0.347254	-1.52594	0.0489606	0.0175517	down	yes	NC_010456.5:128984923..128988536:-
ssc_circ_0008154	4	78.3177	12	225.534	0.347254	-1.52594	0.0489606	0.0175517	down	yes	NC_010460.4:15347146..15347365:-
ssc_circ_0001842	11	215.374	23	432.274	0.498234	-1.0051	0.0493878	0.0176995	down	yes	NC_010445.4:47004817..47007823:+
ssc_circ_0001842	11	215.374	23	432.274	0.498234	-1.0051	0.0493878	0.0176995	down	yes	NC_010445.4:47004817..47007823:+
ssc_circ_0000890	9	176.215	20	375.89	0.468793	-1.09298	0.0496881	0.0177908	down	yes	NC_010443.5:94314527..94315177:+
ssc_circ_0001251	9	176.215	20	375.89	0.468793	-1.09298	0.0496881	0.0177908	down	yes	NC_010444.4:65141048..65141379:-
ssc_circ_0004355	9	176.215	20	375.89	0.468793	-1.09298	0.0496881	0.0177908	down	yes	NC_010450.4:82698451..82703106:+
