# Supplementary material for: A genome-wide landscape of mRNAs, lncRNAs, and circRNAs during subcutaneous adipogenesis in pigs
Source: J Anim Sci Biotechnol. 2018 Nov 1;9:76. doi: 10.1186/s40104-018-0292-7 (PMC6211446; doi:10.1186/s40104-018-0292-7)
Supplement: Supplementary file 13 — List of common differentially expressed (DE) genes for three differentiation stages (D2, D4, and D8) vs D0. Gene ID, fold change, gene name, biotype, and position of common differentially expressed (DE) mRNAs, lncRNAs, and circRNAs. (XLSX 5248 kb) [file 40104_2018_292_MOESM13_ESM.xlsx]

## Sheet: D248_D0 DE mRNAs
Additional file 13 List of common differentially expressed (DE) genes for three differentiation stages (D2, D4, and D8) versus D0. List of common differentially expressed (DE) mRNAs for three differentiation stages (D2, D4, and D8) versus D0.
name	D0	D2	D4	D8	GeneName	Biotype	Position
gene10154	0.74018	1.52216	2.96218	1.65485	DYNLRB2	protein_coding	chrNC_010448.4:7650444-7661380:-
gene10167	0.19573	3.06816	11.8106	3.43218	ADAMTS18	protein_coding	chrNC_010448.4:10488504-10652508:+
gene10220	3.19743	1.10058	1.33985	1.54019	MTSS1L	protein_coding	chrNC_010448.4:13660388-13682311:-
gene10296	0.526018	22.0425	5.19382	2.2297	LOC102166944	protein_coding	chrNC_010448.4:18660665-18662000:+
gene10297	0.458624	11.3178	6.00881	2.55501	MT1A	protein_coding	chrNC_010448.4:18672016-18673673:+
gene10326	13.3409	1.41531	1.30826	4	KIFC3	protein_coding	chrNC_010448.4:19659987-19696104:-
gene10497	7.44851	2.03043	2.69218	3.01757	ADCY7	protein_coding	chrNC_010448.4:34521503-34586384:-
gene10518	0.471722	3.52852	2.53279	2.29685	NETO2	protein_coding	chrNC_010448.4:37443534-37506589:+
gene10563	15.3595	95.3386	162.056	37.1145	CEBPA	protein_coding	chrNC_010448.4:43083200-43085884:-
gene10597	0.590463	1.22369	1.80981	1.37699	FXYD3	protein_coding	chrNC_010448.4:44647771-44654377:+
gene10600	10.093	1.33372	1.09929	3.57074	FXYD5	protein_coding	chrNC_010448.4:44682245-44696088:+
gene10652	15.5295	45.7419	39.6888	37.3436	COX7A1	protein_coding	chrNC_010448.4:45519225-45520721:-
gene10714	11.6685	32.2812	37.9943	30.6764	ECH1	protein_coding	chrNC_010448.4:47627056-47638961:-
gene1073	10.0971	2.27141	2.44832	4.53745	C1H15orf52	protein_coding	chrNC_010443.5:130974635-130983973:+
gene10774	6.25043	1.47899	2.22965	2.85019	NUMBL	protein_coding	chrNC_010448.4:48890056-48918195:-
gene10804	0.109717	1.92037	13.7152	1.53828	CEACAM1	protein_coding	chrNC_010448.4:49437308-49460614:+
gene10806	0.807759	7.15493	31.9419	10.3257	LIPE	protein_coding	chrNC_010448.4:49543671-49560126:+
gene10813	18.2532	5.72034	5.09697	7.46472	ERF	protein_coding	chrNC_010448.4:49678858-49686422:+
gene10848	60.6365	15.9237	15.5978	24.971	PLAUR	protein_coding	chrNC_010448.4:50489773-50505453:-
gene1086	1689.18	191.249	212.059	620.717	THBS1	protein_coding	chrNC_010443.5:131728781-131746098:-
gene10885	33.337	147.555	735.581	718.546	APOE	protein_coding	chrNC_010448.4:51373113-51375333:+
gene10911	7.61084	3.01943	1.55933	3.77137	RTN2	protein_coding	chrNC_010448.4:51855844-51864753:-
gene10914	34.9574	6.62598	7.66969	17.2786	VASP	protein_coding	chrNC_010448.4:51872810-51886729:+
gene10925	7.46772	1.03985	1.09416	3.30404	DMPK	protein_coding	chrNC_010448.4:52100259-52110822:-
gene10976	0.0523783	4.52402	6.69095	1.73257	SULT2A1	protein_coding	chrNC_010448.4:53525496-53536723:-
gene11146	4.8884	1.16511	2.06032	2.18197	MYADM	protein_coding	chrNC_010448.4:56236306-56278577:-
gene11298	26.0512	1.25549	0.678996	1.11362	IL11	protein_coding	chrNC_010448.4:59540482-59544909:-
gene11460	29.6661	92.9897	77.0903	154.684	ISG15	protein_coding	chrNC_010448.4:63363201-63364211:+
gene11550	3.42966	1.13773	1.59723	1.39057	ACOT7	protein_coding	chrNC_010448.4:67152428-67254097:-
gene11640	0.396715	1.63167	3.00802	1.05836	DHRS3	protein_coding	chrNC_010448.4:72556234-72599233:-
gene11739	2.59027	0.919848	1.02591	1.11063	CAMK2N1	protein_coding	chrNC_010448.4:78730204-78734232:-
gene1179	9.92685	4.32915	2.16786	2.74869	PCSK6	protein_coding	chrNC_010443.5:145508658-145697017:+
gene11824	64.4579	17.3109	30.0007	28.6346	STMN1	protein_coding	chrNC_010448.4:83356404-83362546:-
gene11872	118.341	250.477	303.47	498.34	IFI6	protein_coding	chrNC_010448.4:84852782-84858072:-
gene11917	152.649	638.132	3254.15	3804.87	FABP3	protein_coding	chrNC_010448.4:87943003-87950708:-
gene11922	27.3556	5.09555	2.85135	13.3974	TINAGL1	protein_coding	chrNC_010448.4:88095650-88106092:+
gene12090	2.75363	9.74242	40.1748	54.3106	CIDEA	protein_coding	chrNC_010448.4:97253074-97268355:-
gene12102	0.243232	1.19095	2.7654	1.79665	APCDD1	protein_coding	chrNC_010448.4:97991418-98026590:-
gene12136	5.58014	2.3942	1.64678	2.32258	EPB41L3	protein_coding	chrNC_010448.4:101420376-101671177:+
gene12223	9.83776	1.47685	1.89978	3.54839	DSC2	protein_coding	chrNC_010448.4:114982259-115021332:-
gene12290	4.1878	0.254545	1.1294	1.86758	HSBP1L1	protein_coding	chrNC_010448.4:127960330-127972241:+
gene12330	10.0879	25.596	30.3162	33.5302	IFI44	protein_coding	chrNC_010448.4:134634679-134649857:-
gene12332	11.4024	40.0678	65.0442	30.2066	PTGFR	protein_coding	chrNC_010448.4:134727334-134777067:-
gene12339	17.7678	2.21136	2.3382	7.4399	NEXN	protein_coding	chrNC_010448.4:135315000-135382911:-
gene1236	14.7119	3.27808	2.36074	6.48616	LOC100156248	protein_coding	chrNC_010443.5:157820641-157836922:-
gene12377	88.6392	24.2736	15.438	34.157	CTH	protein_coding	chrNC_010448.4:142454922-142486352:-
gene12417	0.454495	2.25455	2.15758	1.12058	ROR1	protein_coding	chrNC_010448.4:148314575-148834659:-
gene12429	23.531	5.93146	6.504	11.2136	DOCK7	protein_coding	chrNC_010448.4:149745375-149971853:+
gene12443	0.756279	4.92689	4.95347	1.93613	NFIA	protein_coding	chrNC_010448.4:150834002-151229773:-
gene1248	0.751019	1.79038	3.35116	4.40381	SERPINB5	protein_coding	chrNC_010443.5:158167756-158195896:-
gene12662	4.13858	1.53331	1.36364	1.99225	PTPRF	protein_coding	chrNC_010448.4:167656674-167743750:-
gene12740	14.4611	5.71588	6.86757	5.89938	SMAP2	protein_coding	chrNC_010448.4:170715106-170763818:-
gene12773	12.1411	1.41134	1.22692	5.08929	TUBB2B	protein_coding	chrNC_010449.5:1952705-1955780:-
gene1286	32.0467	4.25469	6.4838	10.0778	RASL12	protein_coding	chrNC_010443.5:163089440-163104027:-
gene12908	19.5628	5.50247	6.38506	6.46877	TPMT	protein_coding	chrNC_010449.5:13821656-13846107:-
gene13164	0.392828	2.05405	2.16729	1.98488	ZNF389	protein_coding	chrNC_010449.5:22007384-22011998:+
gene13238	4.53288	0.977941	1.46417	2.26101	PPP1R18	protein_coding	chrNC_010449.5:23211806-23222295:-
gene13243	26.5827	6.16864	4.13131	7.13861	IER3	protein_coding	chrNC_010449.5:23265560-23266905:-
gene13291	65.1957	3.73846	2.59433	19.2324	DDAH2	protein_coding	chrNC_010449.5:23838993-23842514:-
gene13292	226.69	24.4144	29.0113	101.785	CLIC1	protein_coding	chrNC_010449.5:23842829-23851162:-
gene13304	0.6854	2.68478	3.1766	2.74895	C2	protein_coding	chrNC_010449.5:24020590-24034042:+
gene13305	0.327091	2.32497	2.22948	2.57917	CFB	protein_coding	chrNC_010449.5:24034077-24040523:+
gene13317	0.33116	1.27797	2.09527	1.34951	EGFL8	protein_coding	chrNC_010449.5:24201129-24205133:+
gene13358	0.518682	1.25102	1.75285	1.25751	SLA-DMB	protein_coding	chrNC_010449.5:25119278-25125089:-
gene13389	24.0387	9.89055	10.9258	11.5162	RAB23	protein_coding	chrNC_010449.5:28632065-28658958:+
gene13390	6.85863	1.56483	1.4595	3.37986	BAG2	protein_coding	chrNC_010449.5:28668587-28680497:-
gene13447	4.88307	61.182	77.3747	38.6111	FKBP5	protein_coding	chrNC_010449.5:31441764-31550704:-
gene136	4.00248	1.32427	0.931446	1.24092	RGS17	protein_coding	chrNC_010443.5:13340253-13442058:+
gene13680	0.0862151	1.08068	1.27365	1.52669	LOC100510917	protein_coding	chrNC_010449.5:46610466-46631202:-
gene13697	0.501505	1.68451	3.43198	1.04771	CRABP1	protein_coding	chrNC_010449.5:47602316-47608865:-
gene13730	56.0757	26.5525	16.6634	11.1425	CEMIP	protein_coding	chrNC_010449.5:49622534-49792547:+
gene13745	3.77555	1.12138	1.29195	1.33731	SH3GL3	protein_coding	chrNC_010449.5:51381091-51514253:-
gene13828	2.2795	36.0603	214.729	90.3115	PLIN1	protein_coding	chrNC_010449.5:55237517-55250797:-
gene13830	0.915147	2.16593	7.42244	7.08397	PEX11A	protein_coding	chrNC_010449.5:55256239-55264253:-
gene13989	0.617926	1.55879	1.43253	3.13266	EGLN3	protein_coding	chrNC_010449.5:65805513-65833536:+
gene14104	10.4955	1.96484	2.0156	4.05963	AJUBA	protein_coding	chrNC_010449.5:76063009-76072884:+
gene14433	127.463	35.6787	54.504	63.6678	ACTN1	protein_coding	chrNC_010449.5:92550132-92644842:-
gene1446	24.9029	7.1614	8.04658	8.19388	GNG2	protein_coding	chrNC_010443.5:181485257-181651972:+
gene14480	13.7159	39.3479	47.9408	29.744	LOC110255331	protein_coding	chrNC_010449.5:96868109-96873604:+
gene14503	15.6563	5.88453	2.08653	3.41714	LTBP2	protein_coding	chrNC_010449.5:97744974-97852848:-
gene14516	1.48547	9.83277	9.6597	4.46108	FOS	protein_coding	chrNC_010449.5:98449508-98451971:+
gene14521	0.334507	1.69247	5.95503	1.30892	FLVCR2	protein_coding	chrNC_010449.5:98718319-98772196:+
gene14532	2.78807	1.03794	1.26202	0.80501	VASH1	protein_coding	chrNC_010449.5:99910644-99933633:+
gene14607	11.5958	2.02872	1.69974	3.0308	GPR68	protein_coding	chrNC_010449.5:112885160-112904214:-
gene14856	2.87091	0.794848	1.00579	1.39938	CPEB2	protein_coding	chrNC_010450.4:10401350-10472141:+
gene1489	10.0486	1.60256	2.03027	4.78443	PELI2	protein_coding	chrNC_010443.5:185397807-185604160:+
gene14968	1.5394	4.0431	19.7867	11.5881	KLB	protein_coding	chrNC_010450.4:30653434-30696123:+
gene14988	161.004	51.7611	22.112	50.9121	UCHL1	protein_coding	chrNC_010450.4:32353766-32367288:+
gene15045	30.0242	4.61732	4.66532	10.1894	RASL11B	protein_coding	chrNC_010450.4:39703399-39708174:+
gene15306	1.06211	2.62737	3.15432	2.43596	NAAA	protein_coding	chrNC_010450.4:71573783-71603256:-
gene15348	273.331	57.0023	52.3818	96.9528	SFRP2	protein_coding	chrNC_010450.4:75337311-75345926:+
gene15665	0.0264415	2.81548	19.1761	27.6936	ADH1C	protein_coding	chrNC_010450.4:121089355-121105010:+
gene15686	25.4794	5.97742	5.55941	11.0567	PDLIM5	protein_coding	chrNC_010450.4:125044027-125259969:-
gene15833	9.50493	2.69045	3.16023	3.72742	ST5	protein_coding	chrNC_010451.4:653814-703383:+
gene16244	0.152366	10.1374	57.7368	47.073	DGAT2	protein_coding	chrNC_010451.4:10032163-10066082:+
gene16256	6.43137	1.93637	1.73852	2.04131	LRRC32	protein_coding	chrNC_010451.4:10802228-10815892:-
gene16272	14.3912	4.51147	5.57183	6.27513	PAK1	protein_coding	chrNC_010451.4:11830095-11973074:-
gene16275	0.498794	1.66686	2.33883	1.04205	AQP11	protein_coding	chrNC_010451.4:12065550-12076339:+
gene16281	0.908366	54.9788	181.681	138.179	THRSP	protein_coding	chrNC_010451.4:12479913-12484323:+
gene16287	0.607601	3.11677	3.97289	1.53084	GAB2	protein_coding	chrNC_010451.4:12663658-12851423:-
gene16339	2.18185	33.5225	60.4261	9.96945	FZD4	protein_coding	chrNC_010451.4:20714995-20721460:-
gene16341	5.40971	18.3818	28.5977	11.2042	TMEM135	protein_coding	chrNC_010451.4:20741085-21020899:+
gene16449	64.1586	3.99779	6.37733	19.7513	MMP1	protein_coding	chrNC_010451.4:33411738-33420205:-
gene16546	0.198841	4.60279	6.86409	2.59314	ZBTB16	protein_coding	chrNC_010451.4:41639536-41839254:+
gene1656	0.205045	1.10283	3.8378	1.02149	ACER2	protein_coding	chrNC_010443.5:203387669-203415018:-
gene16859	1.0333	3.50389	5.79587	2.48657	FMO4	protein_coding	chrNC_010451.4:63908846-63934985:+
gene16865	10.0315	2.08268	3.00519	3.827	ATP2B4	protein_coding	chrNC_010451.4:64336354-64445669:+
gene1691	1.68199	7.46266	14.9051	4.76689	NFIB	protein_coding	chrNC_010443.5:208182397-208427504:+
gene16999	85.0329	34.0513	30.3654	34.0028	PEG10	protein_coding	chrNC_010451.4:74474121-74486983:+
gene17008	0.153286	1.61971	1.96721	1.90579	PDK4	protein_coding	chrNC_010451.4:75246956-75260134:-
gene17009	0.477379	1.50626	3.91812	3.87191	DYNC1I1	protein_coding	chrNC_010451.4:75414663-75760527:+
gene17047	0.904824	1.92491	2.03803	3.32743	ARL4A	protein_coding	chrNC_010451.4:82224985-82228951:+
gene17118	5.46102	12.212	23.2901	18.0347	GPNMB	protein_coding	chrNC_010451.4:92037428-92071501:+
gene17146	76.502	6.96753	5.50148	35.2084	SEMA3D	protein_coding	chrNC_010451.4:95280637-95486109:+
gene17147	0.738565	2.76599	1.89381	2.82909	SEMA3A	protein_coding	chrNC_010451.4:95934937-96387950:+
gene17160	3.90115	20.4657	63.0573	54.703	CD36	protein_coding	chrNC_010451.4:99685748-99782296:-
gene17214	1.58039	11.0974	34.8102	7.83232	PRKAR2B	protein_coding	chrNC_010451.4:106851044-106957519:+
gene17237	26.1361	3.63929	1.03268	7.05025	SFRP4	protein_coding	chrNC_010451.4:108404314-108414335:-
gene17365	2.411	0.890687	1.1124	1.13808	KIAA1614	protein_coding	chrNC_010451.4:122484049-122523072:+
gene17376	35.494	288.326	411.95	126.747	GLUL	protein_coding	chrNC_010451.4:123751551-123762575:-
gene17447	7.65164	3.28074	2.20145	3.27113	BATF3	protein_coding	chrNC_010451.4:130699092-130711719:+
gene17449	9.57947	3.01177	1.86816	4.33026	ATF3	protein_coding	chrNC_010451.4:130772259-130829678:-
gene17484	1.007	4.22118	3.58425	2.96644	HSD11B1	protein_coding	chrNC_010451.4:133231451-133278396:-
gene17557	56.7181	26.6943	18.4636	22.6536	KCTD3	protein_coding	chrNC_010452.4:5754180-5815126:+
gene17636	69.1613	33.5731	33.8579	25.6215	ENAH	protein_coding	chrNC_010452.4:13439772-13609347:-
gene17641	8.97207	45.0064	49.7431	19.3384	EPHX1	protein_coding	chrNC_010452.4:13757489-13773071:+
gene17659	1.15423	17.6077	15.7077	4.64958	COQ8A	protein_coding	chrNC_010452.4:14597237-14643394:+
gene1770	8.67454	55.4	74.845	28.1651	KLF9	protein_coding	chrNC_010443.5:223723613-223747661:-
gene1785	0.675436	36.9462	34.4228	13.7101	ALDH1A1	protein_coding	chrNC_010443.5:226163347-226217342:-
gene17851	2.36403	151.249	40.5668	19.7551	CCL19	protein_coding	chrNC_010452.4:32110366-32112529:+
gene17875	0.327159	2.12032	13.0563	8.47101	AQP3	protein_coding	chrNC_010452.4:33045374-33050285:+
gene18001	21.4602	47.9594	66.8418	66.1105	PHYH	protein_coding	chrNC_010452.4:48404298-48423978:+
gene18486	3.37739	22.2626	33.1059	8.12102	RGCC	protein_coding	chrNC_010453.5:25481845-25496548:-
gene18512	5.42873	0.580554	1.35019	2.27653	DIAPH3	protein_coding	chrNC_010453.5:32492735-32994854:-
gene18539	1.88868	6.50245	11.9336	4.22058	TBC1D4	protein_coding	chrNC_010453.5:47543808-47760928:-
gene18627	18.4094	7.1765	6.90188	8.18072	RAP2A	protein_coding	chrNC_010453.5:66679162-66718565:+
gene18766	0.647771	4.22834	2.9798	1.99289	FN3K	protein_coding	chrNC_010454.4:450427-463756:-
gene18825	493.222	105.819	162.635	219.449	ACTG1	protein_coding	chrNC_010454.4:1320355-1323219:+
gene18863	2.14067	9.4232	10.9874	6.3366	LGALS3BP	protein_coding	chrNC_010454.4:3212435-3222651:+
gene18913	3.46213	11.8684	18.6397	8.05659	CYGB	protein_coding	chrNC_010454.4:4977245-4988283:+
gene19058	6.03075	2.16298	2.98372	1.90377	PRKCA	protein_coding	chrNC_010454.4:12882287-13268647:+
gene19266	1.40315	4.45722	4.31533	4.08478	TTC25	protein_coding	chrNC_010454.4:20766088-20791527:-
gene19278	5.19354	10.7854	29.3653	41.6925	LOC100737113	protein_coding	chrNC_010454.4:21024395-21029875:+
gene19279	6.70574	20.4758	36.2228	58.9533	LOC110255272	protein_coding	chrNC_010454.4:21037349-21041743:+
gene19281	6.15981	13.4527	25.8733	43.9554	LOC110255312	protein_coding	chrNC_010454.4:21074965-21079393:+
gene19352	8.59279	21.4186	36.6534	20.9186	ORMDL3	protein_coding	chrNC_010454.4:22411130-22417744:+
gene19363	0.0791714	1.35185	4.90355	1.85448	PPP1R1B	protein_coding	chrNC_010454.4:22681244-22690978:-
gene19378	87.1693	22.8297	27.3825	43.5015	LASP1	protein_coding	chrNC_010454.4:23222706-23267209:-
gene19526	22.0982	5.58942	2.47101	10.1837	C12H17orf67	protein_coding	chrNC_010454.4:33104570-33125799:-
gene19572	2.90581	0.0129345	1.41561	1.37969	PRR11	protein_coding	chrNC_010454.4:35433694-35462958:+
gene19619	7.153	18.6566	51.7489	24.1449	ACACA	protein_coding	chrNC_010454.4:38580916-38875067:-
gene19622	7.76805	1.62121	1.56438	3.48137	DUSP14	protein_coding	chrNC_010454.4:38941052-38978568:+
gene19630	1.57775	6.52928	20.3502	42.1988	LOC110256045	protein_coding	chrNC_010454.4:39351029-39355689:-
gene19632	2.05925	21.691	41.3209	57.4428	LOC110256043	protein_coding	chrNC_010454.4:39364414-39433654:-
gene19669	54.7352	6.50193	6.65184	21.38	CCL2	protein_coding	chrNC_010454.4:40798109-40800013:-
gene19734	2.63805	9.80221	33.0111	10.2695	UNC119	protein_coding	chrNC_010454.4:44801265-44807334:-
gene19774	0.83447	4.13962	11.2691	5.24086	SSH2	protein_coding	chrNC_010454.4:45818103-46085720:-
gene19787	0.209555	1.75251	7.0322	2.80185	TUSC5	protein_coding	chrNC_010454.4:46623712-46634115:-
gene19800	4.60825	56.646	40.4154	11.7174	RFLNB	protein_coding	chrNC_010454.4:47307657-47316652:+
gene19881	0.535099	1.54445	4.73974	5.64831	ASPA	protein_coding	chrNC_010454.4:49612845-49630303:+
gene19887	99.1286	39.5297	47.0187	48.6343	TAX1BP3	protein_coding	chrNC_010454.4:49754162-49759026:-
gene1990	7.68533	24.5699	44.9973	29.6117	ABCA1	protein_coding	chrNC_010443.5:246144277-246278492:-
gene19935	80.0926	30.1342	26.6772	38.7213	KIF1C	protein_coding	chrNC_010454.4:51899762-51924465:-
gene19939	15.9067	0.734526	1.01143	2.54734	ENO3	protein_coding	chrNC_010454.4:51954614-51959991:-
gene19955	15.4653	5.53621	3.57734	6.63497	CXCL16	protein_coding	chrNC_010454.4:52145100-52150267:+
gene19957	2.71954	1.283	1.30535	1.32962	ARRB2	protein_coding	chrNC_010454.4:52161776-52170362:-
gene19984	0.0923809	1.52728	8.79841	7.57605	SLC2A4	protein_coding	chrNC_010454.4:52628746-52634965:+
gene20285	0.319728	1.14931	2.45682	1.29382	THRB	protein_coding	chrNC_010455.5:10900716-11360587:-
gene20364	8.59424	28.1451	71.689	41.4045	ACAA1	protein_coding	chrNC_010455.5:22964844-23020138:-
gene20429	19.9472	94.0789	157.339	68.5288	ABHD5	protein_coding	chrNC_010455.5:27006331-27053760:+
gene2050	26.8832	9.33977	8.7686	9.96228	UGCG	protein_coding	chrNC_010443.5:252651850-252690817:+
gene20518	0.547836	1.10814	1.93029	1.78242	TREX1	protein_coding	chrNC_010455.5:31177604-31180764:+
gene20598	0.225415	3.49454	8.13929	3.09119	CISH	protein_coding	chrNC_010455.5:33086280-33090540:-
gene20623	16.4442	3.00892	3.78457	6.77674	PCBP4	protein_coding	chrNC_010455.5:34090015-34099959:-
gene20640	0.772819	4.0167	6.45518	2.25712	PHF7	protein_coding	chrNC_010455.5:34553818-34565647:+
gene20681	0.265887	1.80643	3.24077	1.10272	ARHGEF3	protein_coding	chrNC_010455.5:38582618-38925599:-
gene20682	0.236635	9.00326	16.5433	2.90477	IL17RD	protein_coding	chrNC_010455.5:38935631-39006721:-
gene20693	21.1861	5.08046	7.01786	8.12549	FLNB	protein_coding	chrNC_010455.5:39789259-39938751:+
gene20791	1.609	4.28028	6.78658	3.5447	ITPR1	protein_coding	chrNC_010455.5:61068131-61398918:+
gene20841	1.38838	3.14115	4.72891	3.4006	HRH1	protein_coding	chrNC_010455.5:67209261-67411172:+
gene20852	2.9549	26.4458	51.88	25.7633	PPARG	protein_coding	chrNC_010455.5:68301566-68433951:+
gene20932	4.69154	69.6903	92.853	69.608	ACKR4	protein_coding	chrNC_010455.5:73773862-73777770:+
gene2096	295.511	80.6821	80.7298	93.2239	TNC	protein_coding	chrNC_010443.5:255533235-255630381:-
gene21041	3.46412	28.538	27.5836	20.5588	PLSCR4	protein_coding	chrNC_010455.5:86542279-86573665:-
gene2110	3.90745	1.50657	1.78301	1.63295	CDK5RAP2	protein_coding	chrNC_010443.5:260465809-260648070:-
gene21146	11.3116	171.947	395.77	93.2932	PTX3	protein_coding	chrNC_010455.5:97273594-97279570:+
gene21287	2.53633	5.76795	12.735	5.74997	MCCC1	protein_coding	chrNC_010455.5:120983226-121070695:-
gene21354	3.79764	29.6143	178.678	158.207	ADIPOQ	protein_coding	chrNC_010455.5:124633906-124646237:+
gene21374	17.0338	5.35583	6.24569	8.50076	LPP	protein_coding	chrNC_010455.5:125782373-126478927:+
gene21381	13.6723	1.10262	0.70666	2.5539	CLDN1	protein_coding	chrNC_010455.5:127714857-127730628:-
gene21638	0.5952	2.35661	2.73673	2.54194	ALCAM	protein_coding	chrNC_010455.5:153794991-153998241:-
gene21766	63.8941	13.6523	19.221	30.4477	VGLL3	protein_coding	chrNC_010455.5:168790024-168839962:+
gene21905	2.1769	14.3585	31.4485	7.72296	SLC5A3	protein_coding	chrNC_010455.5:197688632-197723323:+
gene21981	12.5013	25.4295	32.6144	36.1766	MX1	protein_coding	chrNC_010455.5:204843049-204868927:+
gene22100	19.2119	94.7119	249.766	142.397	LPL	protein_coding	chrNC_010456.5:4104761-4134964:+
gene22130	8.13148	1.95763	1.82197	4.06418	SORBS3	protein_coding	chrNC_010456.5:6802944-6831152:+
gene22273	63.6715	8.45686	13.6957	28.4003	PALLD	protein_coding	chrNC_010456.5:20678456-21020125:-
gene22390	0.420558	1.93532	2.09693	1.21468	MLXIP	protein_coding	chrNC_010456.5:30575098-30646275:-
gene22504	4.39747	1.21275	1.71625	1.93251	PXN	protein_coding	chrNC_010456.5:40227894-40278785:-
gene22644	13.374	2.33977	4.752	6.11129	SMTN	protein_coding	chrNC_010456.5:47879317-47902700:+
gene22810	0.86806	2.41071	3.17896	2.28366	LYST	protein_coding	chrNC_010456.5:55433163-55633804:+
gene22827	3.8055	9.10632	13.8106	8.3799	IRF2BP2	protein_coding	chrNC_010456.5:56545792-56551131:+
gene22856	2.5817	6.80668	19.2457	8.03742	AGT	protein_coding	chrNC_010456.5:59643030-59656835:+
gene22867	3.08414	1.03861	1.34483	1.53052	CCSAP	protein_coding	chrNC_010456.5:60445052-60465761:+
gene22914	26.5731	12.4008	11.6407	12.189	ARID5B	protein_coding	chrNC_010456.5:65408603-65598485:+
gene22919	0.573153	1.3862	1.99057	1.39594	ZNF365	protein_coding	chrNC_010456.5:65861398-65888341:+
gene22955	1.55335	4.91775	6.94379	4.79943	TET1	protein_coding	chrNC_010456.5:71675671-71812732:+
gene23045	84.4256	28.4159	32.7515	35.4558	PLAU	protein_coding	chrNC_010456.5:76629313-76635173:+
gene23089	5.01046	0.90646	1.05785	2.40286	DYDC1	protein_coding	chrNC_010456.5:82177004-82197160:-
gene231	0.895238	1.90091	4.13964	4.33357	PERP	protein_coding	chrNC_010443.5:26301254-26317046:+
gene23124	0.976483	4.87363	17.475	43.8411	SNCG	protein_coding	chrNC_010456.5:87916353-87922111:+
gene23241	1.71291	5.46617	7.19534	8.76102	IFIT3	protein_coding	chrNC_010456.5:101214730-101225169:+
gene23242	0.657864	6.7991	8.60639	15.9462	IFIT1	protein_coding	chrNC_010456.5:101237403-101249486:+
gene23261	4.0053	9.03567	14.5008	13.5222	PPP1R3C	protein_coding	chrNC_010456.5:103273401-103278757:-
gene23276	40.4701	7.81274	8.72862	19.8269	MYOF	protein_coding	chrNC_010456.5:104770514-104941212:-
gene23349	88.7499	21.7102	20.4425	44.2012	AVPI1	protein_coding	chrNC_010456.5:109044500-109052228:-
gene23352	0.306111	4.8651	10.2989	4.37392	SFRP5	protein_coding	chrNC_010456.5:109120382-109125655:-
gene23360	46.2634	14.8843	4.01386	16.7041	LOXL4	protein_coding	chrNC_010456.5:109571942-109593408:-
gene23386	31.5253	249.464	1052.68	771.966	SCD	protein_coding	chrNC_010456.5:111461560-111478033:+
gene23402	14.3002	3.29156	5.38033	7.11261	SFXN3	protein_coding	chrNC_010456.5:112111483-112119166:+
gene23404	0.596849	1.53541	7.13208	4.25908	KAZALD1	protein_coding	chrNC_010456.5:112142746-112146538:+
gene2341	4.73481	1.88662	2.2243	1.43024	NCS1	protein_coding	chrNC_010443.5:270274504-270334908:+
gene23465	1.16272	2.38035	6.3755	6.84571	COL17A1	protein_coding	chrNC_010456.5:114959404-115007734:-
gene23603	11.8303	3.14166	0.982178	2.43907	AWN	protein_coding	chrNC_010456.5:132240887-132248034:+
gene23634	8.75152	3.28239	3.19164	3.33452	EEF1AKMT2	protein_coding	chrNC_010456.5:134134899-134154666:-
gene23878	0.549534	1.19422	2.08036	1.22947	TMEM177	protein_coding	chrNC_010457.5:31578049-31582472:-
gene23975	10.7484	57.7679	219.354	128.151	ACSL1	protein_coding	chrNC_010457.5:45866858-45936327:-
gene24056	0.445145	1.06715	5.48369	3.71295	DUSP4	protein_coding	chrNC_010457.5:55491084-55508460:+
gene24072	133.96	53.4333	38.9751	64.3922	PLEKHB2	protein_coding	chrNC_010457.5:57428259-57489051:+
gene2417	5.72646	11.6843	65.6199	68.1663	FCN2	protein_coding	chrNC_010443.5:274106276-274111970:+
gene24286	9.33277	3.51572	4.41974	4.51315	PRKRA	protein_coding	chrNC_010457.5:84134273-84156596:-
gene24330	0.313795	2.0249	4.52218	4.86922	CALCRL	protein_coding	chrNC_010457.5:92233264-92332459:-
gene24334	10.4296	1.81271	1.51422	4.99565	GULP1	protein_coding	chrNC_010457.5:92988094-93252188:+
gene24339	490.664	1285.68	2058.35	1624.48	COL3A1	protein_coding	chrNC_010457.5:93556914-93595678:+
gene24369	1.87389	5.49792	23.3131	16.099	CAVIN2	protein_coding	chrNC_010457.5:96476675-96490231:-
gene24419	10.7297	2.65663	5.13065	5.22993	CASP10	protein_coding	chrNC_010457.5:104858082-104895941:+
gene24531	16.7311	77.4208	94.56	65.1175	PECR	protein_coding	chrNC_010457.5:118296359-118335886:-
gene24567	0.297013	1.4761	2.25841	5.79873	CYP27A1	protein_coding	chrNC_010457.5:120809886-120852196:+
gene24587	0.384363	1.08904	3.5764	2.09372	TUBA4A	protein_coding	chrNC_010457.5:121290149-121294048:-
gene24596	435.782	37.6755	4.04936	35.693	DES	protein_coding	chrNC_010457.5:121428539-121435426:+
gene24632	36.4065	7.69762	4.50815	4.71856	SERPINE2	protein_coding	chrNC_010457.5:125748383-125777788:-
gene2470	2.70106	8.95342	17.931	7.13736	PNPLA2	protein_coding	chrNC_010444.4:513065-517962:+
gene24736	29.3736	4.26063	5.27525	4.33822	ARL4C	protein_coding	chrNC_010457.5:134618490-134622211:-
gene24807	28.102	13.0782	8.83353	10.266	CAPN10	protein_coding	chrNC_010457.5:139557643-139568764:+
gene24825	3.99404	0.948171	1.23735	1.40985	BOK	protein_coding	chrNC_010457.5:140171134-140184126:+
gene24839	3.43674	1.13071	1.46103	1.62339	ANKRD33B	protein_coding	chrNC_010458.4:149486-233815:+
gene24906	42.1185	8.35576	10.3448	18.8692	RAI14	protein_coding	chrNC_010458.4:20268728-20435846:+
gene24942	1.56228	7.09785	12.8975	6.22572	LOC102167255	protein_coding	chrNC_010458.4:23627700-23672724:-
gene24963	0.656414	6.61631	18.5007	10.9561	C7	protein_coding	chrNC_010458.4:25846860-25902707:+
gene24974	0.299364	1.88171	4.68746	2.43338	GHR	protein_coding	chrNC_010458.4:27126300-27422618:+
gene24976	40.7455	354.363	583.348	232.638	SELENOP	protein_coding	chrNC_010458.4:27537885-27547863:-
gene25006	0.179394	3.85032	4.60331	1.74896	FGF10	protein_coding	chrNC_010458.4:28695465-28779953:-
gene25013	8.83133	2.40291	2.07108	4.40481	PARP8	protein_coding	chrNC_010458.4:30304800-30486416:+
gene25026	0.829849	2.27542	5.0609	2.57828	FST	protein_coding	chrNC_010458.4:32806341-32811382:+
gene25091	0.956131	3.44718	11.393	4.73245	ELOVL7	protein_coding	chrNC_010458.4:39588122-39680273:-
gene251	1.54262	7.27375	3.80516	0.648574	PDE7B	protein_coding	chrNC_010443.5:27958261-28425754:-
gene25119	7.05059	1.44811	1.3042	2.77621	ADAMTS6	protein_coding	chrNC_010458.4:43702519-44010820:-
gene25134	2.91361	7.90248	14.7949	8.61312	PIK3R1	protein_coding	chrNC_010458.4:46434757-46523626:+
gene2515	20.7745	3.96913	3.98468	8.72415	PHLDA2	protein_coding	chrNC_010444.4:2057679-2058675:-
gene25350	3.17847	27.7843	70.8334	20.635	GPX3	protein_coding	chrNC_010458.4:71980467-71989011:-
gene25407	27.0251	11.9918	8.73032	10.9829	NKD2	protein_coding	chrNC_010458.4:79400323-79419779:-
gene25454	25.5814	2.90861	2.45866	6.6792	ZDHHC2	protein_coding	chrNC_010459.5:4855129-4928109:+
gene25460	0.481082	1.04411	1.82033	1.27647	SLC7A2	protein_coding	chrNC_010459.5:5191973-5271849:+
gene25462	0.444801	1.01497	2.24859	2.12157	MTUS1	protein_coding	chrNC_010459.5:5331668-5507212:-
gene2550	3.43601	1.25541	0.954394	1.51969	LOC110259229	protein_coding	chrNC_010444.4:4123786-4132938:+
gene25535	3.28771	11.2006	22.4594	6.81624	CDS2	protein_coding	chrNC_010459.5:14151810-14220841:+
gene25666	6.46746	2.66536	2.98871	3.15733	RNF24	protein_coding	chrNC_010459.5:31705355-31799490:+
gene25865	18.7022	2.71858	2.51825	7.93641	MYL9	protein_coding	chrNC_010459.5:39788165-39795240:+
gene25901	0.54825	1.17139	2.87301	4.42282	ADIG	protein_coding	chrNC_010459.5:41609367-41631142:+
gene25934	7.06868	0.981203	3.50868	2.92891	MYBL2	protein_coding	chrNC_010459.5:46256245-46287929:+
gene25966	0.222191	2.95482	6.75793	1.82581	SLPI	protein_coding	chrNC_010459.5:47595804-47598364:-
gene26055	3.64426	17.2151	23.6258	10.2891	PTGIS	protein_coding	chrNC_010459.5:51153151-51200515:-
gene2606	2.17327	9.17012	30.3519	15.4269	PC	protein_coding	chrNC_010444.4:5566608-5587797:+
gene262	9.64102	57.1891	47.4848	26.0172	SGK1	protein_coding	chrNC_010443.5:29625786-29753619:+
gene2631	7.79572	2.27841	2.20564	1.43785	CD248	protein_coding	chrNC_010444.4:6070885-6073518:+
gene26338	9.5528	1.81859	2.49986	2.97234	ZYX	protein_coding	chrNC_010460.4:6861072-6870256:-
gene26492	0.464777	1.60117	1.5135	1.17956	PLXNA4	protein_coding	chrNC_010460.4:16475250-16977821:+
gene26541	34.4696	6.92207	3.69169	9.62944	FLNC	protein_coding	chrNC_010460.4:19759734-19787616:-
gene26662	0.40169	5.25342	14.9583	2.89786	EEPD1	protein_coding	chrNC_010460.4:37824450-37948855:-
gene26674	0.181968	4.92597	11.9602	2.0801	BMPER	protein_coding	chrNC_010460.4:39417830-39664010:-
gene26691	7.62827	2.0172	1.50206	2.62966	PDE1C	protein_coding	chrNC_010460.4:40818316-41410555:+
gene26759	0.837474	2.50088	4.11842	4.17624	SNX10	protein_coding	chrNC_010460.4:46064575-46142983:-
gene26869	21.6595	10.6643	10.5042	10.4236	YAE1D1	protein_coding	chrNC_010460.4:54656517-54663207:-
gene26913	7.50477	3.64312	2.62936	2.41044	LOC100519997	protein_coding	chrNC_010461.5:486396-517329:-
gene27059	55.1844	221.944	221.423	158.596	SAT1	protein_coding	chrNC_010461.5:19908037-19910553:+
gene27162	16.7005	61.4779	127.516	34.2191	SRPX	protein_coding	chrNC_010461.5:34075577-34198462:-
gene27204	53.7782	170.119	167.736	131.623	MAOA	protein_coding	chrNC_010461.5:38930452-39006220:+
gene27471	0.490699	2.43323	6.40595	1.21153	SLC16A2	protein_coding	chrNC_010461.5:59748685-59861018:+
gene27581	4.26866	10.6561	11.9822	78.314	TNMD	protein_coding	chrNC_010461.5:82269323-82292083:+
gene27605	4.99767	1.62892	1.76896	2.48219	ARMCX2	protein_coding	chrNC_010461.5:83213939-83218601:-
gene27637	8.20266	3.08618	1.94822	3.70105	TCEAL1	protein_coding	chrNC_010461.5:84518999-84521020:+
gene27670	3.26427	33.5075	23.6172	31.7087	TSC22D3	protein_coding	chrNC_010461.5:88171325-88233583:-
gene27880	14.9243	7.04133	7.17087	7.1691	SLC9A6	protein_coding	chrNC_010461.5:111176461-111233108:+
gene28112	6.53754	2.46831	2.31418	2.24052	LOC110257935	protein_coding	chrNC_010462.3:6511350-6524989:-
gene2814	13.8848	1.17756	1.16543	6.44005	FADS3	protein_coding	chrNC_010444.4:9607627-9627352:+
gene28390	2.18328	4.82944	5.17099	4.42063	PTGDS	protein_coding	chrNW_018084833.1:888420-891225:-
gene28420	2.4704	1.09168	0.988439	1.20099	GPSM1	protein_coding	chrNW_018084833.1:1356024-1383224:-
gene29445	1.84757	6.14802	7.7289	4.93407	LOC110258721	protein_coding	chrNW_018085187.1:11736-20590:+
gene30259	0.0996673	6.69547	41.7228	33.0374	LOC110259135	protein_coding	chrNW_018085343.1:26620-60650:+
gene309	4.42281	12.4629	27.9518	15.4812	LAMA2	protein_coding	chrNC_010443.5:33765412-34359741:-
gene3113	63.5012	148.578	292.868	227.657	HSD17B12	protein_coding	chrNC_010444.4:18461487-18611761:-
gene3148	37.0485	10.6375	14.7432	18.3869	CD44	protein_coding	chrNC_010444.4:25788699-25884209:-
gene3156	39.0275	338.741	547.486	136.77	CAT	protein_coding	chrNC_010444.4:26493664-26533881:-
gene3172	0.948024	2.62008	2.86053	1.91768	DEPDC7	protein_coding	chrNC_010444.4:27909282-27928859:-
gene3209	0.817927	4.62563	5.12901	2.16232	FIBIN	protein_coding	chrNC_010444.4:33328250-33331752:-
gene3257	5.86565	17.0821	14.2645	25.069	SAA3	protein_coding	chrNC_010444.4:41021349-41025950:+
gene3286	0.501244	1.60678	4.12679	2.03363	PDE3B	protein_coding	chrNC_010444.4:44416934-44614075:-
gene3291	45.8156	15.7249	12.4347	17.9177	RRAS2	protein_coding	chrNC_010444.4:44890129-44961003:+
gene3292	1.51053	84.053	110.052	23.8227	SPON1	protein_coding	chrNC_010444.4:44967982-45299677:-
gene3613	39.9088	10.112	9.38337	14.3935	JUND	protein_coding	chrNC_010444.4:59530991-59532846:+
gene3645	5.26618	13.8948	18.9132	25.4286	BST2	protein_coding	chrNC_010444.4:60305306-60308295:+
gene3699	0.792536	4.06065	4.50165	4.66997	LOC110255237	protein_coding	chrNC_010444.4:61893963-61917944:-
gene3702	0.354319	1.09731	2.60114	2.16779	CYP4F55	protein_coding	chrNC_010444.4:62051989-62071003:-
gene3704	1.52704	0.607803	6.04994	24.9139	PGLYRP2	protein_coding	chrNC_010444.4:62135578-62140180:+
gene3976	1.22521	7.41863	37.1378	11.7209	COL5A3	protein_coding	chrNC_010444.4:68828197-68869914:-
gene4035	94.3175	4.21668	2.39284	24.2473	CNN1	protein_coding	chrNC_010444.4:70183370-70190756:+
gene4062	19.1676	72.2432	57.0997	8.58696	ANGPTL4	protein_coding	chrNC_010444.4:70905767-70912892:-
gene433	3.216	1.09898	0.731415	1.14769	NT5E	protein_coding	chrNC_010443.5:54400786-54450743:+
gene4345	8.43965	40.9182	46.7666	17.9432	GFPT2	protein_coding	chrNC_010444.4:78285208-78328288:+
gene4472	0.126784	1.03671	1.95332	2.00229	IQGAP2	protein_coding	chrNC_010444.4:85294423-85633645:+
gene4474	8.5493	65.2119	77.079	31.4112	F2RL2	protein_coding	chrNC_010444.4:85534188-85542062:-
gene4765	8.5316	50.5262	42.3243	17.148	ISOC1	protein_coding	chrNC_010444.4:131857126-131877873:+
gene4895	0.528759	3.19449	2.94483	1.15375	EGR1	protein_coding	chrNC_010444.4:140440829-140445302:+
gene5184	560.725	116.695	174.051	266.664	ACTB	protein_coding	chrNC_010445.4:4084275-4090383:-
gene5364	1951.17	219.6	213.178	527.14	SERPINE1	protein_coding	chrNC_010445.4:8863738-8871572:+
gene5430	0.341133	1.52898	2.28794	1.90046	METTL27	protein_coding	chrNC_010445.4:11054822-11057734:-
gene5441	4.51968	1.84504	2.08082	2.08932	CLIP2	protein_coding	chrNC_010445.4:11419446-11505417:+
gene567	4.86679	30.7491	31.7811	11.3604	SESN1	protein_coding	chrNC_010443.5:75056731-75170374:-
gene5853	149.902	28.749	36.9932	73.1947	TNFRSF12A	protein_coding	chrNC_010445.4:39166288-39168294:-
gene5891	12.0607	48.465	57.6397	31.745	ECI1	protein_coding	chrNC_010445.4:39750742-39758516:+
gene6122	11.5318	1.44396	1.51453	4.98446	FHL2	protein_coding	chrNC_010445.4:49389900-49448459:+
gene6143	0.223167	3.94761	2.79782	1.81184	IL1R2	protein_coding	chrNC_010445.4:52367434-52406393:-
gene62	0.268579	1.95701	2.23382	1.06678	PRKN	protein_coding	chrNC_010443.5:5698508-6731132:+
gene6253	11.3027	26.5344	60.0971	34.4616	RETSAT	protein_coding	chrNC_010445.4:59401161-59416829:+
gene6288	3.42546	1.34005	0.520926	1.24206	LOXL3	protein_coding	chrNC_010445.4:68498114-68516829:+
gene6395	7.83283	2.49998	2.80965	3.65875	MEIS1	protein_coding	chrNC_010445.4:75485024-75625855:-
gene6496	0.962855	3.29646	2.92307	1.99281	CHAC2	protein_coding	chrNC_010445.4:87405937-87417268:-
gene6631	25.4231	3.91794	5.16354	10.5889	CRIM1	protein_coding	chrNC_010445.4:103612231-103815493:-
gene6668	117.367	14.1415	16.04	58.0746	LBH	protein_coding	chrNC_010445.4:109078285-109113536:-
gene6716	7.15771	20.1063	58.5537	19.1217	SLC5A6	protein_coding	chrNC_010445.4:111919298-111930944:+
gene6767	0.567549	1.75525	1.7262	1.40628	LOC100738909	protein_coding	chrNC_010445.4:114537223-114577993:-
gene6834	1.1049	3.12761	4.94271	3.09017	TRIB2	protein_coding	chrNC_010445.4:124170677-124196253:-
gene7137	0.238039	2.49961	5.32521	2.55388	SNTB1	protein_coding	chrNC_010446.5:18288756-18524362:+
gene7182	0.435722	1.09004	2.95106	2.87787	SYBU	protein_coding	chrNC_010446.5:27899264-27975389:+
gene7272	163.646	58.5187	49.2629	67.6101	RIDA	protein_coding	chrNC_010446.5:38656270-38665863:+
gene734	7.91753	3.02553	3.3338	3.90961	SMAD2	protein_coding	chrNC_010443.5:97415360-97511388:-
gene7379	77.5177	200.65	853.294	1557.32	FABP4	protein_coding	chrNC_010446.5:55096400-55101209:+
gene7382	63.1148	140.527	589.023	554.863	FABP5	protein_coding	chrNC_010446.5:55277831-55282585:-
gene7414	0.0338388	6.45947	3.61433	2.25943	PI15	protein_coding	chrNC_010446.5:61114490-61142869:-
gene7491	0.356204	2.57949	2.27173	1.09822	TTPA	protein_coding	chrNC_010446.5:70960580-70980883:+
gene7525	5.57196	17.0508	21.9171	12.8649	PENK	protein_coding	chrNC_010446.5:75525497-75530403:+
gene7596	23.0281	7.12709	7.49184	8.94563	ATP1B1	protein_coding	chrNC_010446.5:81912543-81937015:-
gene7601	16.201	7.28857	4.08936	2.66432	DPT	protein_coding	chrNC_010446.5:82287657-82319380:+
gene7766	97.2861	32.9452	25.0023	42.7846	PEA15	protein_coding	chrNC_010446.5:90263600-90276142:-
gene7875	17.7498	0.983547	1.86889	4.27789	NES	protein_coding	chrNC_010446.5:93412660-93421899:+
gene7989	8.07874	3.93421	3.07289	26.8212	S100A1	protein_coding	chrNC_010446.5:96007026-96012305:-
gene8001	3.7114	132.154	122.01	99.6962	S100A8	protein_coding	chrNC_010446.5:96209670-96210603:+
gene8002	13.961	172.263	183.372	175.867	S100A12	protein_coding	chrNC_010446.5:96225691-96227030:+
gene8003	4.96138	126.994	103.814	67.7085	S100A9	protein_coding	chrNC_010446.5:96236114-96238989:-
gene8056	0.273321	2.049	10.0051	5.82345	SELENBP1	protein_coding	chrNC_010446.5:97860925-97894007:+
gene8069	6.46031	1.11317	1.36004	2.05274	MLLT11	protein_coding	chrNC_010446.5:98165990-98171674:-
gene8097	17.1332	5.1562	5.64683	7.63265	PLEKHO1	protein_coding	chrNC_010446.5:98924115-98934610:-
gene8135	155.021	568.607	435.981	547.504	TXNIP	protein_coding	chrNC_010446.5:99348589-99351760:+
gene8330	10.0434	3.26276	3.89322	4.51776	CSF1	protein_coding	chrNC_010446.5:110178466-110198232:-
gene8401	6.64852	2.46204	0.528703	44.1491	COL11A1	protein_coding	chrNC_010446.5:115638381-115841679:+
gene8407	1.9109	15.2181	11.0627	4.91052	S1PR1	protein_coding	chrNC_010446.5:117064632-117069724:-
gene8415	8.28317	17.9665	44.2328	28.4586	VCAM1	protein_coding	chrNC_010446.5:117496914-117511211:-
gene8552	34.5361	8.10074	4.03077	14.0559	DDAH1	protein_coding	chrNC_010446.5:130485305-130617534:+
gene8764	10.2806	2.26386	1.91614	4.46108	MAFF	protein_coding	chrNC_010447.5:9683651-9696128:-
gene8778	1.52964	7.0122	8.47282	3.89466	GCAT	protein_coding	chrNC_010447.5:10027133-10038494:-
gene8802	5.87399	15.9126	24.3109	16.3725	TST	protein_coding	chrNC_010447.5:10749264-10759623:+
gene8814	75.3254	18.6737	23.3559	36.9202	MYH9	protein_coding	chrNC_010447.5:11365603-11456475:+
gene8874	256.709	24.8029	40.7663	119.561	TUBA1A	protein_coding	chrNC_010447.5:15186059-15190211:-
gene8900	0.787273	5.08444	15.3809	15.8955	GPD1	protein_coding	chrNC_010447.5:16008179-16021676:+
gene8940	0.639228	1.34861	5.29201	6.53648	KRT6A	protein_coding	chrNC_010447.5:17830147-17851113:-
gene8941	44.4285	107.462	179.543	275.425	KRT5	protein_coding	chrNC_010447.5:17862047-17868397:-
gene9102	2.22999	10.6382	48.9151	21.6902	ITGA7	protein_coding	chrNC_010447.5:21126565-21150875:-
gene9161	0.0907983	1.55038	6.94591	3.1845	RDH16	protein_coding	chrNC_010447.5:22251751-22266801:-
gene9220	2.33419	10.1328	14.5136	8.47738	SLC16A7	protein_coding	chrNC_010447.5:24713009-24871891:+
gene9232	0.446794	1.12709	2.84266	1.13669	PPM1H	protein_coding	chrNC_010447.5:27299777-27572303:-
gene927	0.620697	1.63986	1.65832	1.2849	FAM227B	protein_coding	chrNC_010443.5:122139343-122373488:+
gene9444	32.4703	237.904	389.835	226.079	MGST1	protein_coding	chrNC_010447.5:56259566-56283823:-
gene9448	17.8106	3.14362	3.73693	6.24738	EPS8	protein_coding	chrNC_010447.5:56817445-57005117:+
gene9456	0.360947	8.13415	19.6464	53.0676	MGP	protein_coding	chrNC_010447.5:57665272-57669360:+
gene9464	0.665338	1.49563	2.57055	4.7752	PLBD1	protein_coding	chrNC_010447.5:57950872-58022059:+
gene9571	0.269804	1.41872	1.00758	1.38417	CD163	protein_coding	chrNC_010447.5:63300200-63334497:+
gene9581	44.7492	115.511	178.478	119.666	C1S	protein_coding	chrNC_010447.5:63670309-63681466:-
gene9582	1.76374	7.29737	13.6292	8.69999	LPCAT3	protein_coding	chrNC_010447.5:63707674-63746369:+
gene9760	20.886	1.02644	1.05194	8.17193	AMIGO2	protein_coding	chrNC_010447.5:77642144-77645748:-
gene993	6.40049	2.17712	1.64778	2.81268	MAP1A	protein_coding	chrNC_010443.5:127916639-127936952:-
gene9948	32.6318	128.267	186.396	76.9667	LUM	protein_coding	chrNC_010447.5:91748871-91756381:+
gene9966	3.36331	14.931	15.8552	6.94112	DUSP6	protein_coding	chrNC_010447.5:93303058-93307510:+
gene9996	0.189328	1.65473	3.02971	1.70948	ACSS3	protein_coding	chrNC_010447.5:100272255-100429229:-
rna78612	0.803928	4.40869	7.53919	5.03855	rna78612	protein_coding	chrNC_000845.1:6444-6509:-

## Sheet: D248_D0 DE lncRNAs
Additional file 13 List of common differentially expressed (DE) genes for three differentiation stages (D2, D4, and D8) versus D0. List of common differentially expressed (DE) lncRNAs for three differentiation stages (D2, D4, and D8) versus D0.
name	D0	D2	D4	D8	GeneName	Biotype	Position
MSTRG.146410	52.0065	3.5217	3.0312	12.6683	--	linc	chrNC_010459.5:54491694-54533892:+
MSTRG.142096	5.97851	1.70759	1.89412	1.04083	--	linc	chrNC_010458.4:71846149-71849160:+
MSTRG.67937	22.8308	3.49728	1.2931	8.82284	--	linc	chrNC_010449.5:5669670-5734016:-
MSTRG.131380	15.0495	1.91778	2.73856	3.56057	--	antisense	chrNC_010457.5:33326717-33328324:+
MSTRG.83843	11.054	3.16875	3.53187	3.63895	--	linc	chrNC_010451.4:613688-623901:+
MSTRG.18804	1.23066	4.25023	3.41922	3.27101	--	linc	chrNC_010444.4:15927825-15929970:+
MSTRG.97367	57.073	11.8107	7.54295	13.3618	--	antisense	chrNC_010453.5:1139288-1187871:+
MSTRG.143415	16.8499	1.1059	1.0904	2.99589	--	linc	chrNC_010459.5:14845490-14845865:-
MSTRG.47163	3.53118	1.1664	1.24281	1.3633	--	linc	chrNC_010446.5:129358210-129360362:-
MSTRG.35547	45.963	15.0065	12.743	19.379	--	linc	chrNC_010445.4:93248861-93258223:-
MSTRG.22314	48.7661	1.81104	1.78566	17.2481	--	antisense	chrNC_010444.4:69273046-69313225:+
MSTRG.49742	1.78072	9.36705	14.9002	7.2404	--	linc	chrNC_010447.5:24874032-24878228:+
MSTRG.65804	111.886	20.3602	8.7219	9.90671	--	antisense	chrNC_010448.4:145422196-145427430:-
MSTRG.88924	161.431	78.2225	31.9828	62.6481	--	antisense	chrNC_010451.4:70354635-70399503:-
gene684	1.90469	6.57488	5.34483	4.45287	LOC106506626	lncRNA	chrNC_010443.5:92272630-92286786:-
gene20646	5.94505	13.2977	17.1649	15.4963	SMIM4	lncRNA	chrNC_010455.5:34679623-34687171:+
gene13595	3.3051	1.25078	1.07316	1.6521	LOC106504420	lncRNA	chrNC_010449.5:38717189-38746368:+
gene20904	32.4221	14.8726	7.66704	15.6571	LOC110256294	lncRNA	chrNC_010455.5:71762284-71779903:+
gene2412	1.03725	4.64901	2.77055	0.444503	LOC110256538	lncRNA	chrNC_010443.5:273581438-273582827:+
MSTRG.98462	8.0871	1.2169	0.999873	3.36528	--	antisense	chrNC_010453.5:19056294-19061089:+
MSTRG.124323	2.41714	1.0238	0.876629	1.0948	--	linc	chrNC_010456.5:61719432-61793309:+
gene7524	39.5488	1.01033	0.0889437	8.6264	LOC100514834	lncRNA	chrNC_010446.5:75294209-75296319:-
MSTRG.58078	0.0574234	1.1809	1.28079	2.15938	--	linc	chrNC_010448.4:43527546-43528055:+
MSTRG.143373	0.693901	3.47345	2.42135	1.79802	--	antisense	chrNC_010459.5:14899010-14900132:+
MSTRG.144551	0.372906	2.11803	2.45742	2.07747	--	antisense	chrNC_010459.5:32965509-32984406:+
MSTRG.100469	0.418371	2.83416	1.27247	1.02828	--	linc	chrNC_010453.5:70939841-70943021:-
MSTRG.62128	0.364355	3.05959	4.00563	1.18936	--	linc	chrNC_010448.4:79810276-79811573:+
MSTRG.6375	0.437702	1.13349	1.88596	1.47323	--	linc	chrNC_010443.5:112942445-112944976:+
MSTRG.42239	0.396368	3.03818	3.37006	1.21073	--	linc	chrNC_010446.5:70928839-70933680:+
MSTRG.156300	0.255093	1.47663	2.47127	1.18427	--	antisense	chrNW_018084787.1:26594-27178:-
MSTRG.5521	0.756548	2.9042	3.8862	2.24787	--	linc	chrNC_010443.5:99227861-99246997:+
gene16545	0.00962613	1.31533	1.60703	1.08596	LOC106504875	lncRNA	chrNC_010451.4:41631006-41639471:-
gene10577	0.616928	1.61536	2.71679	1.36751	LOC110260979	lncRNA	chrNC_010448.4:44052952-44060764:+
gene13392	0.479189	1.79171	1.81077	2.09319	LOC100522935	lncRNA	chrNC_010449.5:28765547-28766251:+
gene24260	0.409314	1.14311	1.50621	2.51256	LOC102158914	lncRNA	chrNC_010457.5:81804907-81806589:+
gene10862	0.446217	1.1679	1.85068	1.14878	LOC102167899	lncRNA	chrNC_010448.4:50766518-50770096:+
gene16329	0.887519	2.23623	2.77234	4.9444	LOC102168178	lncRNA	chrNC_010451.4:20034334-20036505:+

## Sheet: D248_D0 DE circRNAs
Additional file 13 List of common differentially expressed (DE) genes for three differentiation stages (D2, D4, and D8) versus D0. List of common differentially expressed (DE) circRNAs for three differentiation stages (D2, D4, and D8) versus D0.
circRNA_ID	D0	D2	D4	D8	Location
ssc_circ_0000065	96.2559	239.766	273.089	277.224	NC_010443.5:113128000..113128579:+
ssc_circ_0000157	44.9194	123.516	112.797	0	NC_010443.5:130233523..130242062:+
ssc_circ_0000288	38.5024	217.969	106.861	126.011	NC_010443.5:163743155..163758473:-
ssc_circ_0000292	166.844	50.8594	35.6203	58.8052	NC_010443.5:16406041..16415727:+
ssc_circ_0000367	192.512	43.5937	53.4304	84.0074	NC_010443.5:182340847..182341782:+
ssc_circ_0000412	166.844	29.0625	53.4304	0	NC_010443.5:190648253..190649258:+
ssc_circ_0000450	179.678	87.1875	47.4937	0	NC_010443.5:206097434..206114157:+
ssc_circ_0000677	359.356	123.516	59.3671	151.213	NC_010443.5:270874729..270884307:+
ssc_circ_0000692	545.45	261.562	243.405	218.419	NC_010443.5:273972338..273979720:+
ssc_circ_0000810	250.265	50.8594	11.8734	92.4082	NC_010443.5:77086749..77087208:+
ssc_circ_0000815	32.0853	239.766	338.392	84.0074	NC_010443.5:77215898..77279692:-
ssc_circ_0001014	346.521	188.906	130.608	117.61	NC_010444.4:138308109..138308679:+
ssc_circ_0001193	12.8341	72.6562	65.3038	109.21	NC_010444.4:47486153..47489786:-
ssc_circ_0001226	147.592	50.8594	23.7468	58.8052	NC_010444.4:59261733..59262716:+
ssc_circ_0001278	96.2559	29.0625	23.7468	0	NC_010444.4:70827334..70836232:-
ssc_circ_0001292	160.427	50.8594	53.4304	58.8052	NC_010444.4:76582777..76583208:-
ssc_circ_0001450	314.436	29.0625	94.9874	75.6067	NC_010445.4:103690300..103773127:-
ssc_circ_0001613	12.8341	101.719	106.861	67.2059	NC_010445.4:131272241..131272989:+
ssc_circ_0001636	205.346	43.5937	47.4937	58.8052	NC_010445.4:16850859..16851571:-
ssc_circ_0001713	134.758	36.3281	23.7468	42.0037	NC_010445.4:28645515..28659610:+
ssc_circ_0001725	301.602	159.844	59.3671	109.21	NC_010445.4:31250808..31253767:+
ssc_circ_0001727	147.592	65.3906	41.557	0	NC_010445.4:31250811..31253767:+
ssc_circ_0001808	12.8341	79.9219	83.114	126.011	NC_010445.4:4257857..4279580:-
ssc_circ_0002169	275.934	65.3906	112.797	117.61	NC_010446.5:125831440..125835266:+
ssc_circ_0002193	314.436	79.9219	100.924	142.813	NC_010446.5:15288794..15303961:+
ssc_circ_0002280	109.09	29.0625	23.7468	0	NC_010446.5:39934333..39947397:-
ssc_circ_0002385	51.3365	152.578	106.861	126.011	NC_010446.5:79822366..79825948:+
ssc_circ_0002387	64.1706	247.031	314.646	184.816	NC_010446.5:79987800..79990116:-
ssc_circ_0002666	173.261	50.8594	41.557	42.0037	NC_010447.5:3717600..3739361:-
ssc_circ_0002700	282.351	123.516	17.8101	109.21	NC_010447.5:51444401..51448377:-
ssc_circ_0002701	12.8341	101.719	71.2405	159.614	NC_010447.5:51558424..51561815:+
ssc_circ_0002908	154.01	36.3281	35.6203	0	NC_010448.4:101570971..101577333:+
ssc_circ_0002919	417.109	174.375	166.228	218.419	NC_010448.4:103910117..103911289:-
ssc_circ_0002931	571.119	290.625	243.405	344.43	NC_010448.4:1051422..1057079:-
ssc_circ_0003160	121.924	494.062	528.367	226.82	NC_010448.4:166989367..167024441:+
ssc_circ_0003171	38.5024	108.984	89.0507	0	NC_010448.4:169018075..169073044:+
ssc_circ_0003233	320.853	566.719	546.177	924.082	NC_010448.4:29344146..29357287:+
ssc_circ_0003255	70.5877	239.766	166.228	319.228	NC_010448.4:34714334..34725179:-
ssc_circ_0003362	19.2512	65.3906	89.0507	92.4082	NC_010448.4:54722894..54723246:+
ssc_circ_0003465	19.2512	123.516	89.0507	67.2059	NC_010448.4:84934413..84951139:+
ssc_circ_0003674	141.175	14.5312	23.7468	50.4045	NC_010449.5:2397188..2401736:+
ssc_circ_0003738	224.597	87.1875	89.0507	75.6067	NC_010449.5:4574943..4584896:+
ssc_circ_0003905	295.185	116.25	124.671	100.809	NC_010449.5:68514625..68521235:+
ssc_circ_0003984	38.5024	290.625	279.025	134.412	NC_010449.5:93773489..93775334:-
ssc_circ_0004064	12.8341	87.1875	77.1772	58.8052	NC_010450.4:113967111..113982056:-
ssc_circ_0004093	205.346	72.6562	94.9874	75.6067	NC_010450.4:125092162..125121806:-
ssc_circ_0004145	147.592	297.891	225.595	252.022	NC_010450.4:135780981..135786172:-
ssc_circ_0004172	51.3365	188.906	136.544	168.015	NC_010450.4:167697..171693:+
ssc_circ_0004349	32.0853	87.1875	154.355	109.21	NC_010450.4:80787216..80815987:-
ssc_circ_0004373	109.09	21.7969	17.8101	0	NC_010450.4:87641604..87664522:-
ssc_circ_0004395	256.683	123.516	100.924	109.21	NC_010450.4:964857..968127:+
ssc_circ_0004586	147.592	348.75	29.6836	0	NC_010451.4:127566656..127577646:+
ssc_circ_0004619	109.09	29.0625	29.6836	16.8015	NC_010451.4:131873041..131880686:-
ssc_circ_0004645	109.09	210.703	225.595	243.621	NC_010451.4:19885865..19913189:-
ssc_circ_0004648	378.607	138.047	77.1772	176.416	NC_010451.4:19905675..19913189:-
ssc_circ_0004661	115.507	232.5	391.823	344.43	NC_010451.4:20809498..20833620:+
ssc_circ_0004700	19.2512	167.109	207.785	117.61	NC_010451.4:33731308..33732436:+
ssc_circ_0004753	147.592	36.3281	59.3671	33.603	NC_010451.4:44717823..44718203:+
ssc_circ_0004779	211.763	43.5937	35.6203	42.0037	NC_010451.4:56972613..56973685:-
ssc_circ_0004814	186.095	72.6562	59.3671	25.2022	NC_010451.4:70821197..70835752:+
ssc_circ_0004824	57.7536	123.516	154.355	285.625	NC_010451.4:72153385..72160471:-
ssc_circ_0004986	32.0853	116.25	118.734	126.011	NC_010452.4:20438111..20481282:-
ssc_circ_0005041	275.934	138.047	118.734	117.61	NC_010452.4:32800584..32819154:+
ssc_circ_0005074	3516.55	1889.06	1436.68	1604.54	NC_010452.4:42061873..42079536:+
ssc_circ_0005085	205.346	72.6562	47.4937	16.8015	NC_010452.4:42063616..42147610:+
ssc_circ_0005093	44.9194	167.109	154.355	134.412	NC_010452.4:42468077..42479927:-
ssc_circ_0005195	282.351	130.781	136.544	117.61	NC_010452.4:5761746..5772004:+
ssc_circ_0005386	166.844	58.125	41.557	58.8052	NC_010453.5:33391961..33392814:+
ssc_circ_0005423	70.5877	167.109	201.848	184.816	NC_010453.5:51540591..51551593:+
ssc_circ_0005489	12.8341	58.125	53.4304	100.809	NC_010453.5:71125629..71135931:+
ssc_circ_0005504	327.27	43.5937	83.114	142.813	NC_010453.5:77484689..77489240:+
ssc_circ_0005517	64.1706	290.625	148.418	142.813	NC_010453.5:78382356..78383968:+
ssc_circ_0005623	25.6682	101.719	83.114	84.0074	NC_010454.4:20118352..20123255:+
ssc_circ_0005650	275.934	58.125	65.3038	50.4045	NC_010454.4:2306701..2308584:+
ssc_circ_0005773	179.678	276.094	397.76	697.262	NC_010454.4:38796303..38800438:-
ssc_circ_0005779	141.175	1990.78	5384.6	6594.58	NC_010454.4:39366927..39391822:-
ssc_circ_0005874	173.261	36.3281	23.7468	33.603	NC_010454.4:50206420..50209164:-
ssc_circ_0005920	179.678	21.7969	47.4937	67.2059	NC_010454.4:56438413..56473522:+
ssc_circ_0005925	115.507	43.5937	35.6203	0	NC_010454.4:57219146..57220106:-
ssc_circ_0005951	12.8341	50.8594	154.355	92.4082	NC_010454.4:59821853..59822490:+
ssc_circ_0005978	442.777	762.89	872.697	873.677	NC_010454.4:60373334..60376920:-
ssc_circ_0005979	121.924	406.875	326.519	277.224	NC_010454.4:60375325..60376920:-
ssc_circ_0006111	96.2559	203.438	160.291	210.019	NC_010455.5:132321056..132337788:-
ssc_circ_0006165	231.014	65.3906	53.4304	84.0074	NC_010455.5:137373443..137376721:-
ssc_circ_0006210	583.953	225.234	267.152	319.228	NC_010455.5:148517273..148534946:-
ssc_circ_0006369	12.8341	58.125	124.671	67.2059	NC_010455.5:206595223..206626785:-
ssc_circ_0006396	25.6682	123.516	267.152	84.0074	NC_010455.5:23319029..23322097:+
ssc_circ_0006409	77.0047	21.7969	17.8101	0	NC_010455.5:26086741..26109530:-
ssc_circ_0006411	19.2512	65.3906	118.734	67.2059	NC_010455.5:26682837..26686462:+
ssc_circ_0006652	154.01	43.5937	41.557	50.4045	NC_010455.5:77068767..77075075:+
ssc_circ_0006671	19.2512	65.3906	142.481	100.809	NC_010455.5:79323253..79342130:-
ssc_circ_0006674	314.436	159.844	160.291	92.4082	NC_010455.5:82256891..82274534:+
ssc_circ_0006702	173.261	50.8594	29.6836	75.6067	NC_010455.5:86452535..86474319:-
ssc_circ_0006795	38.5024	203.438	243.405	210.019	NC_010456.5:112705127..112714985:-
ssc_circ_0006808	19.2512	65.3906	59.3671	67.2059	NC_010456.5:120993720..120996812:+
ssc_circ_0006813	141.175	21.7969	11.8734	0	NC_010456.5:121395348..121396290:+
ssc_circ_0006850	115.507	225.234	243.405	210.019	NC_010456.5:131238819..131262177:-
ssc_circ_0006857	160.427	36.3281	71.2405	0	NC_010456.5:131560094..131576631:-
ssc_circ_0006896	147.592	29.0625	11.8734	0	NC_010456.5:136410332..136412160:+
ssc_circ_0006939	83.4218	319.688	427.443	554.449	NC_010456.5:2843131..2861536:-
ssc_circ_0007137	397.858	850.078	1870.06	621.655	NC_010456.5:71765050..71773116:+
ssc_circ_0007148	77.0047	14.5312	11.8734	0	NC_010456.5:71999543..72004798:+
ssc_circ_0007328	12.8341	116.25	47.4937	67.2059	NC_010457.5:112869863..112896614:-
ssc_circ_0007334	205.346	29.0625	11.8734	0	NC_010457.5:117071799..117095608:-
ssc_circ_0007471	64.1706	421.406	195.911	252.022	NC_010457.5:4207163..4211249:-
ssc_circ_0007544	121.924	43.5937	17.8101	0	NC_010457.5:63645207..63661287:+
ssc_circ_0007589	160.427	36.3281	65.3038	0	NC_010457.5:75966720..75970294:+
ssc_circ_0007642	121.924	36.3281	23.7468	25.2022	NC_010457.5:84220498..84225453:+
ssc_circ_0007798	224.597	334.219	83.114	58.8052	NC_010458.4:43984409..44011065:-
ssc_circ_0007988	198.929	72.6562	59.3671	0	NC_010459.5:34795182..34795577:-
ssc_circ_0008081	166.844	21.7969	47.4937	0	NC_010459.5:52987380..52998000:-
ssc_circ_0008088	128.341	43.5937	29.6836	50.4045	NC_010459.5:58621631..58643708:+
ssc_circ_0008178	198.929	370.547	344.329	403.236	NC_010460.4:17598680..17629822:-
ssc_circ_0008183	128.341	465	623.355	537.648	NC_010460.4:17859078..17947161:+
ssc_circ_0008214	205.346	87.1875	59.3671	25.2022	NC_010460.4:24985702..25003037:+
ssc_circ_0008250	38.5024	203.438	296.836	142.813	NC_010460.4:40161261..40184681:-
ssc_circ_0008251	147.592	29.0625	53.4304	16.8015	NC_010460.4:40175333..40184681:-
ssc_circ_0008266	295.185	145.312	136.544	100.809	NC_010460.4:42329914..42330668:-
ssc_circ_0008330	109.09	29.0625	41.557	0	NC_010460.4:612442..618436:+
ssc_circ_0008557	141.175	29.0625	53.4304	0	NW_018084833.1:304068..318832:-
ssc_circ_0008559	359.356	174.375	130.608	201.618	NW_018084833.1:315438..318832:-
ssc_circ_0000820	391.441	704.765	0	562.85	NC_010443.5:77263699..77270404:-
ssc_circ_0001539	102.673	203.438	0	25.2022	NC_010445.4:114743498..114755035:+
ssc_circ_0002458	154.01	14.5312	0	33.603	NC_010446.5:94391005..94391746:+
ssc_circ_0002503	115.507	29.0625	0	42.0037	NC_010447.5:101579751..101587848:+
ssc_circ_0003347	44.9194	188.906	0	126.011	NC_010448.4:52971038..52992912:+
ssc_circ_0003712	166.844	65.3906	0	58.8052	NC_010449.5:31677976..31681220:-
ssc_circ_0004147	1020.31	573.984	0	352.831	NC_010450.4:137747353..137749645:+
ssc_circ_0004336	186.095	29.0625	0	42.0037	NC_010450.4:74913874..74915277:+
ssc_circ_0004830	205.346	65.3906	0	25.2022	NC_010451.4:73094595..73102060:+
ssc_circ_0004875	141.175	29.0625	0	58.8052	NC_010451.4:8646177..8646907:-
ssc_circ_0005084	1469.51	646.64	0	403.236	NC_010452.4:42063616..42079536:+
ssc_circ_0005121	134.758	43.5937	0	25.2022	NC_010452.4:46240171..46251083:+
ssc_circ_0005720	38.5024	123.516	0	134.412	NC_010454.4:3589853..3599602:-
ssc_circ_0007434	147.592	50.8594	0	50.4045	NC_010457.5:16790296..16796655:-
ssc_circ_0007494	295.185	36.3281	0	58.8052	NC_010457.5:48094739..48096210:+
ssc_circ_0008568	83.4218	21.7969	0	16.8015	NW_018084874.1:655379..663972:-
ssc_circ_0000844	128.341	0	581.798	1050.09	NC_010443.5:82875117..82891579:+
ssc_circ_0000938	211.763	0	47.4937	92.4082	NC_010444.4:115894554..115897120:+
ssc_circ_0001650	115.507	0	17.8101	25.2022	NC_010445.4:18045916..18046140:+
ssc_circ_0001842	147.592	0	65.3038	25.2022	NC_010445.4:47004817..47007823:+
ssc_circ_0002022	166.844	0	77.1772	42.0037	NC_010445.4:92779851..92782233:+
ssc_circ_0002129	288.768	0	29.6836	84.0074	NC_010446.5:123140335..123146129:+
ssc_circ_0002398	121.924	0	11.8734	16.8015	NC_010446.5:82779059..82785563:-
ssc_circ_0002615	115.507	0	35.6203	42.0037	NC_010447.5:28843589..28844046:+
ssc_circ_0002970	57.7536	0	142.481	134.412	NC_010448.4:109117107..109141734:-
ssc_circ_0003228	147.592	0	23.7468	33.603	NC_010448.4:28736919..28754026:+
ssc_circ_0003301	109.09	0	23.7468	25.2022	NC_010448.4:42537042..42539106:-
ssc_circ_0003378	70.5877	0	17.8101	16.8015	NC_010448.4:63879633..63893464:-
ssc_circ_0003623	102.673	0	17.8101	25.2022	NC_010449.5:117718801..117735703:+
ssc_circ_0003825	699.46	0	290.899	420.037	NC_010449.5:58850363..58868520:+
ssc_circ_0004515	109.09	0	35.6203	16.8015	NC_010451.4:118068519..118074614:-
ssc_circ_0005723	141.175	0	47.4937	50.4045	NC_010454.4:35952997..35960199:+
ssc_circ_0005982	83.4218	0	23.7468	25.2022	NC_010454.4:6073486..6074110:-
ssc_circ_0006535	134.758	0	53.4304	33.603	NC_010455.5:38541875..38545830:-
ssc_circ_0006727	641.706	0	231.532	336.03	NC_010455.5:97912254..97995384:+
ssc_circ_0006868	731.545	0	391.823	445.239	NC_010456.5:134281823..134282673:+
ssc_circ_0007487	186.095	0	11.8734	42.0037	NC_010457.5:46425015..46429747:-
ssc_circ_0007760	70.5877	0	11.8734	159.614	NC_010458.4:34633974..34639666:-
ssc_circ_0008617	346.521	0	148.418	109.21	NW_018085128.1:27615..36179:+
ssc_circ_0000021	0	116.25	77.1772	176.416	NC_010443.5:106150521..106171073:+
ssc_circ_0000030	0	58.125	89.0507	67.2059	NC_010443.5:107535162..107553238:-
ssc_circ_0000210	0	50.8594	53.4304	67.2059	NC_010443.5:139791489..139791984:-
ssc_circ_0000432	0	36.3281	29.6836	67.2059	NC_010443.5:202536297..202536998:+
ssc_circ_0000647	0	210.703	89.0507	75.6067	NC_010443.5:264644525..264782210:-
ssc_circ_0000757	0	94.4531	89.0507	84.0074	NC_010443.5:593018..611340:+
ssc_circ_0000762	0	58.125	362.139	201.618	NC_010443.5:641934..653683:+
ssc_circ_0000819	0	58.125	47.4937	42.0037	NC_010443.5:77254058..77279692:-
ssc_circ_0000842	0	43.5937	65.3038	75.6067	NC_010443.5:82022945..82023413:+
ssc_circ_0000899	0	58.125	47.4937	50.4045	NC_010443.5:96493194..96516009:-
ssc_circ_0001033	0	116.25	65.3038	75.6067	NC_010444.4:141219340..141220554:+
ssc_circ_0001048	0	152.578	142.481	100.809	NC_010444.4:142406868..142407330:+
ssc_circ_0001059	0	65.3906	53.4304	100.809	NC_010444.4:147515855..147525270:-
ssc_circ_0001091	0	58.125	83.114	50.4045	NC_010444.4:15967840..16021491:+
ssc_circ_0001113	0	58.125	112.797	50.4045	NC_010444.4:2079637..2085863:-
ssc_circ_0001219	0	65.3906	35.6203	75.6067	NC_010444.4:58270838..58271233:+
ssc_circ_0001241	0	58.125	59.3671	84.0074	NC_010444.4:621540..627163:+
ssc_circ_0001245	0	181.641	184.038	235.221	NC_010444.4:62307779..62313757:+
ssc_circ_0001271	0	43.5937	59.3671	42.0037	NC_010444.4:69564515..69565336:+
ssc_circ_0001337	0	43.5937	47.4937	100.809	NC_010444.4:82200380..82200981:+
ssc_circ_0001361	0	130.781	106.861	50.4045	NC_010444.4:87254645..87264182:+
ssc_circ_0001383	0	50.8594	59.3671	50.4045	NC_010444.4:8990325..8991248:-
ssc_circ_0001461	0	196.172	189.975	184.816	NC_010445.4:106380539..106443851:-
ssc_circ_0001545	0	188.906	225.595	201.618	NC_010445.4:115218429..115219189:+
ssc_circ_0001588	0	50.8594	89.0507	58.8052	NC_010445.4:125886851..125900323:+
ssc_circ_0001710	0	43.5937	77.1772	67.2059	NC_010445.4:28638834..28692651:+
ssc_circ_0001731	0	43.5937	77.1772	109.21	NC_010445.4:31255432..31258924:+
ssc_circ_0001893	0	392.344	350.266	344.43	NC_010445.4:59424959..59425872:-
ssc_circ_0002176	0	65.3906	65.3038	84.0074	NC_010446.5:129116233..129134916:-
ssc_circ_0002243	0	108.984	47.4937	42.0037	NC_010446.5:31972148..31996226:-
ssc_circ_0002459	0	65.3906	53.4304	50.4045	NC_010446.5:94405984..94418263:+
ssc_circ_0002465	0	94.4531	77.1772	142.813	NC_010446.5:94601795..94602258:+
ssc_circ_0002600	0	72.6562	47.4937	92.4082	NC_010447.5:27173898..27175753:+
ssc_circ_0002628	0	36.3281	83.114	67.2059	NC_010447.5:30653358..30654236:+
ssc_circ_0002654	0	65.3906	94.9874	42.0037	NC_010447.5:34492206..34513084:+
ssc_circ_0002710	0	50.8594	77.1772	58.8052	NC_010447.5:53623267..53659626:-
ssc_circ_0002742	0	181.641	94.9874	75.6067	NC_010447.5:6565453..6566862:+
ssc_circ_0002778	0	50.8594	53.4304	50.4045	NC_010447.5:69698164..69699221:+
ssc_circ_0002891	0	72.6562	47.4937	92.4082	NC_010447.5:92992680..92993106:+
ssc_circ_0002954	0	43.5937	35.6203	42.0037	NC_010448.4:106936502..106994788:+
ssc_circ_0003181	0	87.1875	94.9874	67.2059	NC_010448.4:17193646..17201280:-
ssc_circ_0003183	0	87.1875	53.4304	50.4045	NC_010448.4:17352018..17356850:-
ssc_circ_0003244	0	58.125	53.4304	126.011	NC_010448.4:31388854..31404916:-
ssc_circ_0003259	0	36.3281	160.291	134.412	NC_010448.4:34743079..34747797:-
ssc_circ_0003604	0	58.125	94.9874	84.0074	NC_010449.5:114594354..114596124:+
ssc_circ_0003630	0	159.844	178.101	126.011	NC_010449.5:120464280..120473807:-
ssc_circ_0003688	0	94.4531	195.911	92.4082	NC_010449.5:28639544..28653086:+
ssc_circ_0003699	0	123.516	118.734	100.809	NC_010449.5:30441064..30441599:-
ssc_circ_0003747	0	65.3906	41.557	42.0037	NC_010449.5:47969622..47971049:-
ssc_circ_0003768	0	174.375	148.418	117.61	NC_010449.5:51782208..51792316:+
ssc_circ_0003802	0	36.3281	77.1772	100.809	NC_010449.5:56524083..56526919:-
ssc_circ_0003909	0	50.8594	47.4937	42.0037	NC_010449.5:68514625..68539413:+
ssc_circ_0003929	0	254.297	118.734	134.412	NC_010449.5:77950751..77956163:+
ssc_circ_0004000	0	65.3906	53.4304	42.0037	NC_010449.5:96543074..96555754:+
ssc_circ_0004065	0	101.719	154.355	100.809	NC_010450.4:114266870..114285079:+
ssc_circ_0004220	0	130.781	172.165	168.015	NC_010450.4:31993513..31997428:-
ssc_circ_0004362	0	50.8594	77.1772	142.813	NC_010450.4:83267616..83268011:+
ssc_circ_0004393	0	101.719	112.797	109.21	NC_010450.4:96061920..96073073:+
ssc_circ_0004417	0	36.3281	35.6203	50.4045	NC_010451.4:102492067..102493049:-
ssc_circ_0004466	0	43.5937	53.4304	67.2059	NC_010451.4:11061550..11108098:+
ssc_circ_0004504	0	58.125	41.557	84.0074	NC_010451.4:118014576..118018949:-
ssc_circ_0004563	0	43.5937	65.3038	42.0037	NC_010451.4:124746022..124747461:+
ssc_circ_0004662	0	116.25	213.722	75.6067	NC_010451.4:20809498..20879578:+
ssc_circ_0004696	0	65.3906	47.4937	42.0037	NC_010451.4:33043520..33061432:+
ssc_circ_0004735	0	72.6562	94.9874	176.416	NC_010451.4:41643139..41644483:+
ssc_circ_0004883	0	130.781	112.797	100.809	NC_010451.4:89383377..89400450:+
ssc_circ_0004925	0	87.1875	65.3038	58.8052	NC_010452.4:12624649..12652349:-
ssc_circ_0004949	0	43.5937	35.6203	226.82	NC_010452.4:14217434..14218735:-
ssc_circ_0005080	0	893.672	558.051	873.677	NC_010452.4:42063516..42147610:+
ssc_circ_0005173	0	50.8594	65.3038	50.4045	NC_010452.4:53158220..53202893:-
ssc_circ_0005224	0	43.5937	41.557	58.8052	NC_010452.4:63899363..63912175:+
ssc_circ_0005299	0	79.9219	112.797	58.8052	NC_010453.5:1355228..1376231:-
ssc_circ_0005424	0	79.9219	65.3038	58.8052	NC_010453.5:51540591..51554792:+
ssc_circ_0005618	0	50.8594	41.557	67.2059	NC_010454.4:18552929..18555766:+
ssc_circ_0005678	0	50.8594	35.6203	75.6067	NC_010454.4:27249779..27250993:-
ssc_circ_0005821	0	138.047	53.4304	100.809	NC_010454.4:43096806..43097800:+
ssc_circ_0005909	0	116.25	71.2405	75.6067	NC_010454.4:54396785..54492240:-
ssc_circ_0006051	0	87.1875	71.2405	58.8052	NC_010455.5:120778216..120795359:+
ssc_circ_0006070	0	72.6562	100.924	92.4082	NC_010455.5:121802237..121802974:-
ssc_circ_0006146	0	87.1875	83.114	100.809	NC_010455.5:134624946..134633963:+
ssc_circ_0006159	0	43.5937	53.4304	67.2059	NC_010455.5:135019965..135062178:+
ssc_circ_0006184	0	94.4531	41.557	42.0037	NC_010455.5:140731010..140750477:-
ssc_circ_0006217	0	58.125	118.734	117.61	NC_010455.5:157429171..157436827:+
ssc_circ_0006266	0	36.3281	35.6203	42.0037	NC_010455.5:17582876..17602712:+
ssc_circ_0006320	0	36.3281	47.4937	50.4045	NC_010455.5:197360626..197370804:+
ssc_circ_0006401	0	261.562	516.494	436.839	NC_010455.5:24074311..24075912:+
ssc_circ_0006496	0	36.3281	100.924	92.4082	NC_010455.5:32466924..32541480:+
ssc_circ_0006613	0	50.8594	89.0507	42.0037	NC_010455.5:69223492..69228869:-
ssc_circ_0006623	0	50.8594	53.4304	42.0037	NC_010455.5:71719658..71720414:+
ssc_circ_0006700	0	58.125	29.6836	176.416	NC_010455.5:86452535..86459135:-
ssc_circ_0006812	0	145.312	154.355	92.4082	NC_010456.5:121316588..121320413:+
ssc_circ_0006844	0	36.3281	29.6836	100.809	NC_010456.5:129769785..129775865:+
ssc_circ_0006879	0	87.1875	29.6836	42.0037	NC_010456.5:136258011..136271400:+
ssc_circ_0006913	0	247.031	172.165	117.61	NC_010456.5:14989270..14992789:+
ssc_circ_0006956	0	94.4531	65.3038	100.809	NC_010456.5:29689597..29696108:+
ssc_circ_0007011	0	101.719	29.6836	42.0037	NC_010456.5:40966694..40972298:-
ssc_circ_0007023	0	217.969	231.532	243.621	NC_010456.5:45490289..45490796:-
ssc_circ_0007053	0	130.781	65.3038	50.4045	NC_010456.5:55274140..55277629:+
ssc_circ_0007054	0	130.781	178.101	75.6067	NC_010456.5:55301204..55308756:+
ssc_circ_0007057	0	50.8594	130.608	42.0037	NC_010456.5:55341575..55343743:+
ssc_circ_0007085	0	72.6562	83.114	151.213	NC_010456.5:60813334..60813820:-
ssc_circ_0007122	0	43.5937	89.0507	92.4082	NC_010456.5:71491530..71493586:+
ssc_circ_0007134	0	87.1875	41.557	67.2059	NC_010456.5:71615773..71625769:-
ssc_circ_0007169	0	79.9219	77.1772	84.0074	NC_010456.5:73752038..73759656:+
ssc_circ_0007173	0	50.8594	29.6836	100.809	NC_010456.5:7473479..7483479:-
ssc_circ_0007246	0	196.172	71.2405	226.82	NC_010456.5:9478895..9480356:-
ssc_circ_0007248	0	65.3906	71.2405	134.412	NC_010456.5:9478895..9505715:-
ssc_circ_0007326	0	79.9219	65.3038	58.8052	NC_010457.5:112808098..112896614:-
ssc_circ_0007398	0	123.516	47.4937	67.2059	NC_010457.5:135924097..135931508:+
ssc_circ_0007402	0	159.844	77.1772	58.8052	NC_010457.5:137883502..137889389:+
ssc_circ_0007420	0	188.906	71.2405	50.4045	NC_010457.5:151025..154802:+
ssc_circ_0007453	0	50.8594	65.3038	67.2059	NC_010457.5:29932361..29939777:+
ssc_circ_0007462	0	283.359	166.228	193.217	NC_010457.5:33441214..33441613:+
ssc_circ_0007466	0	247.031	77.1772	58.8052	NC_010457.5:3913056..3943647:-
ssc_circ_0007536	0	94.4531	53.4304	168.015	NC_010457.5:60397513..60403463:-
ssc_circ_0007554	0	108.984	71.2405	100.809	NC_010457.5:66000520..66027687:+
ssc_circ_0007587	0	108.984	231.532	277.224	NC_010457.5:75944605..75953955:+
ssc_circ_0007707	0	43.5937	118.734	92.4082	NC_010458.4:19906267..19906628:-
ssc_circ_0007835	0	43.5937	89.0507	134.412	NC_010458.4:50437615..50446698:-
ssc_circ_0007837	0	36.3281	41.557	92.4082	NC_010458.4:50437615..50478728:-
ssc_circ_0007873	0	36.3281	77.1772	168.015	NC_010458.4:64650290..64669823:+
ssc_circ_0007909	0	43.5937	35.6203	42.0037	NC_010459.5:1179581..1182709:-
ssc_circ_0007999	0	36.3281	35.6203	50.4045	NC_010459.5:37831734..37854328:+
ssc_circ_0008002	0	254.297	41.557	67.2059	NC_010459.5:37852424..37854328:+
ssc_circ_0008083	0	94.4531	65.3038	67.2059	NC_010459.5:53037004..53043217:-
ssc_circ_0008165	0	65.3906	112.797	168.015	NC_010460.4:16583749..16605796:+
ssc_circ_0008182	0	108.984	225.595	151.213	NC_010460.4:17859078..17912006:+
ssc_circ_0008244	0	43.5937	142.481	75.6067	NC_010460.4:39594413..39630407:-
ssc_circ_0008255	0	65.3906	59.3671	67.2059	NC_010460.4:40367081..40381716:-
ssc_circ_0008271	0	79.9219	71.2405	42.0037	NC_010460.4:44837492..44838430:-
ssc_circ_0008298	0	65.3906	47.4937	58.8052	NC_010460.4:52417988..52495626:+
ssc_circ_0008342	0	65.3906	178.101	75.6067	NC_010460.4:9133515..9140672:-
ssc_circ_0008431	0	43.5937	29.6836	42.0037	NC_010461.5:46314295..46315147:-
ssc_circ_0008448	0	43.5937	47.4937	67.2059	NC_010461.5:54286536..54293347:-
ssc_circ_0008551	0	36.3281	29.6836	50.4045	NW_018084833.1:262604..267811:-
ssc_circ_0008561	0	94.4531	89.0507	126.011	NW_018084833.1:315438..329028:-
ssc_circ_0008572	0	58.125	94.9874	42.0037	NW_018084979.1:1174519..1174823:+
